# Supplementary material for: Cell aging preserves cellular immortality in the presence of lethal levels of damage
Source: PLoS Biol. 2019 May 23;17(5):e3000266. doi: 10.1371/journal.pbio.3000266 (PMC6532838; doi:10.1371/journal.pbio.3000266)
Supplement: S7 Data — Raw data used for Figs 1E, 2E, 3B, 4C, 4C, 4J, 5B and 5E, S1D, S1E, S2A and S2B Figs. (XLSX) [file pbio.3000266.s014.xlsx]

## Sheet: Fig 1E
Fig 1E Data
k0	k1	k2	d0	d1	d2
0.108896	0.0296363	0.0970162	0.17289	0.0880521	0.160105
0.12577	0.0183986	0.108896	0.191099	0.0761036	0.17289
0.222612	0.124871	0.12577	0.296882	0.190127	0.191099
0.117922	0.0584396	0.222612	0.182623	0.118763	0.296882
0.194763	0.101611	0.117922	0.266208	0.165047	0.182623
0.169473	0.0558654	0.194763	0.238542	0.116013	0.266208
0.103403	0.00881497	0.169473	0.166975	0.0659277	0.238542
0.162896	0.0290526	0.103403	0.231373	0.087431	0.166975
0.127728	-0.00033923	0.162896	0.193215	0.0562193	0.231373
0.139362	0.0889262	0.127728	0.205808	0.151414	0.193215
0.137095	0.036135	0.139362	0.203352	0.0949701	0.205808
0.143639	0.0520711	0.137095	0.210444	0.111961	0.203352
0.0675311	0.0480841	0.143639	0.128483	0.107707	0.210444
0.188047	-0.0133331	0.0675311	0.258845	0.0424577	0.128483
0.118441	0.132404	0.188047	0.183183	0.198273	0.258845
0.098933	0.00415855	0.118441	0.162166	0.060988	0.183183
0.0429099	0.0743156	0.098933	0.102189	0.135746	0.162166
0.118712	0.0468794	0.0429099	0.183476	0.106422	0.102189
0.152057	0.0733254	0.124401	0.219583	0.134686	0.189619
0.12851	-0.0403787	0.152057	0.19406	0.0138808	0.219583
0.150036	0.053033	0.12851	0.217387	0.112988	0.19406
0.107126	0.0412787	0.150036	0.170984	0.10045	0.217387
0.0962267	0.0840504	0.107126	0.159257	0.146181	0.170984
0.162088	0.0415318	0.0962267	0.230494	0.10072	0.159257
0.0954164	0.102657	0.162088	0.158386	0.166173	0.230494
0.0524045	-0.00423314	0.0954164	0.112317	0.0520931	0.158386
0.0932754	0.0551013	0.0524045	0.156085	0.115197	0.112317
0.127314	0.0286452	0.0932754	0.192768	0.0869976	0.156085
0.117351	0.0726065	0.127314	0.182007	0.133916	0.192768
0.0847441	0.0757976	0.117351	0.146925	0.137333	0.182007
0.103294	0.0452159	0.0847441	0.166858	0.104648	0.146925
0.0874525	0.0403158	0.103294	0.149832	0.099424	0.166858
0.0877065	0.0363017	0.0874525	0.150104	0.0951477	0.149832
0.0354101	0.0561736	0.0877065	0.0941981	0.116342	0.150104
0.107918	0.00892797	0.0354101	0.171838	0.0660476	0.0941981
0.164148	0.0570851	0.107918	0.232737	0.117316	0.171838
0.159351	0.113468	0.164148	0.227514	0.177819	0.232737
0.123142	0.194106	0.159351	0.188259	0.265488	0.227514
0.212372	0.115047	0.123142	0.285576	0.179522	0.188259
0.151302	0.0642983	0.212372	0.218763	0.125025	0.285576
0.0593374	0.00798493	0.151302	0.119722	0.0650469	0.218763
0.0893183	0.0457743	0.0593374	0.151835	0.105243	0.119722
0.0932729	0.124632	0.0893183	0.156082	0.189869	0.151835
0.116222	0.0612201	0.0932729	0.180789	0.121734	0.156082
0.0441145	0.12417	0.116222	0.103473	0.18937	0.180789
0.112661	0.0153144	0.0441145	0.176949	0.0728274	0.103473
0.0947273	0.0335119	0.112661	0.157645	0.092177	0.176949
0.116976	-0.017945	0.0947273	0.181602	0.0375784	0.157645
0.0884873	0.015144	0.116976	0.150942	0.0726464	0.181602
0.0956237	0.054125	0.0884873	0.158608	0.114154	0.150942
0.046911	0.069878	0.0956237	0.106455	0.130995	0.158608
0.0820346	0.00528473	0.046911	0.144019	0.0621824	0.106455
0.0943224	0.00226649	0.0820346	0.15721	0.0589817	0.144019
0.146392	0.00644726	0.0943224	0.213432	0.0634156	0.15721
0.109029	-0.00115486	0.146392	0.173034	0.0553549	0.213432
0.126914	0.0542224	0.109029	0.192335	0.114258	0.173034
0.106912	0.050681	0.126914	0.170753	0.110478	0.192335
0.113469	0.0410258	0.129203	0.177819	0.100181	0.194811
0.0941875	0.0720528	0.113469	0.157065	0.133323	0.177819
0.0253219	0.0650322	0.0941875	0.0834626	0.12581	0.157065
0.130927	0.084244	0.0253219	0.196675	0.146389	0.0834626
0.0929698	0.109843	0.130927	0.155756	0.173911	0.196675
0.0723301	0.029937	0.0929698	0.13362	0.0883721	0.155756
0.0639532	-0.00116913	0.0723301	0.124656	0.0553398	0.13362
0.0226387	-0.00156484	0.0639532	0.0806098	0.0549204	0.124656
0.0193884	0.00861593	0.0226387	0.0771553	0.0657165	0.0806098
0.0697153	0.0154862	0.0193884	0.130821	0.0730098	0.0771553
0.125489	0.0702665	0.0697153	0.190795	0.131411	0.130821
0.12583	0.0724775	0.125489	0.191163	0.133778	0.190795
0.181614	0.0251976	0.12583	0.251803	0.0833304	0.191163
0.0959085	0.0126768	0.181614	0.158914	0.0700267	0.251803
0.148917	0.0671402	0.0959085	0.216172	0.128065	0.158914
0.0680616	0.0512019	0.148917	0.129051	0.111034	0.216172
0.129389	0.138329	0.0680616	0.195012	0.204688	0.129051
0.0747125	-0.00861341	0.129389	0.136171	0.0474538	0.195012
0.0741616	0.16834	0.0747125	0.135581	0.237306	0.136171
0.0642309	0.0261221	0.0741616	0.124953	0.0843136	0.135581
0.0840708	0.12899	0.0642309	0.146203	0.19458	0.124953
0.0508679	0.131651	0.0840708	0.110677	0.197458	0.146203
0.0788819	0.107822	0.0508679	0.140639	0.171733	0.110677
0.105838	0.0838492	0.0788819	0.169597	0.145965	0.140639
0.0357922	0.12914	0.105838	0.0946051	0.194742	0.169597
0.203272	0.101508	0.0357922	0.275556	0.164937	0.0946051
0.138778	0.0667006	0.203272	0.205175	0.127595	0.275556
0.145366	0.11393	0.138778	0.212319	0.178317	0.205175
0.0756655	0.10941	0.145366	0.137192	0.173444	0.212319
0.0642139	0.0196008	0.0756655	0.124935	0.077381	0.137192
0.0885608	0.00320687	0.0642139	0.151021	0.0599788	0.124935
0.0839962	0.0485668	0.0885608	0.146123	0.108222	0.151021
0.109577	-0.0105056	0.0839962	0.173624	0.0454504	0.146123
0.087489	0.107142	0.109577	0.149871	0.171002	0.173624
-0.04203	0.0597471	0.087489	0.0121387	0.12016	0.149871
0.0310289	0.0402981	-0.04203	0.089534	0.0994052	0.0121387
0.0656243	0.0588498	0.0310289	0.126443	0.119201	0.089534
0.128231	0.114947	0.0656243	0.193759	0.179414	0.126443
0.0408907	0.0425084	0.128231	0.100037	0.101761	0.193759
0.099166	-0.023302	0.0408907	0.162417	0.0319141	0.100037
0.131498	0.0524853	0.099166	0.197293	0.112404	0.162417
0.0942456	0.120909	0.131498	0.157127	0.185848	0.197293
0.0774906	0.0762718	0.0942456	0.139148	0.137842	0.157127
0.0865266	-0.0480664	0.0774906	0.148838	0.00577344	0.139148
0.0752452	0.0872602	0.0865266	0.136742	0.149625	0.148838
0.149182	0.0916483	0.0752452	0.216461	0.154337	0.136742
0.127882	0.138622	0.149182	0.193382	0.205007	0.216461
0.148845	0.120177	0.127882	0.216094	0.185057	0.193382
0.080024	0.0889663	0.148845	0.141863	0.151457	0.216094
0.130122	-0.000397132	0.080024	0.195804	0.056158	0.141863
0.130833	-0.0178249	0.130122	0.196573	0.0377054	0.195804
0.113484	0.00122816	0.130833	0.177836	0.0578808	0.196573
0.11752	0.0810297	0.113484	0.182189	0.142941	0.177836
0.0242084	0.0543975	0.11752	0.0822786	0.114445	0.182189
0.0726656	-0.0319542	0.0242084	0.133979	0.0227729	0.0822786
0.0496967	-0.0523981	0.0726656	0.109427	0.00120814	0.133979
0.139397	0.0532802	0.0496967	0.205846	0.113252	0.109427
0.110489	0.0951509	0.139397	0.174607	0.1581	0.205846
0.0312131	0.064697	0.0917144	0.08973	0.125451	0.154408
0.0917144	0.0596512	0.0380206	0.154408	0.120057	0.0969786
0.0380206	-0.0169321	0.0399281	0.0969786	0.0386498	0.0990109
0.0399281	0.0868478	0.0584247	0.0990109	0.149183	0.118747
0.0584247	0.0469477	0.167786	0.118747	0.106494	0.236702
0.167786	0.0211427	0.0649367	0.236702	0.0790195	0.125708
0.0649367	0.00526064	0.061853	0.125708	0.0621569	0.122411
0.061853	-0.0743124	0.156768	0.122411	-0.0218563	0.224704
0.156768	-0.0168359	0.0432728	0.224704	0.0387516	0.102576
0.0432728	0.0633751	0.126448	0.102576	0.124038	0.191831
0.126448	0.026247	0.160114	0.191831	0.0844465	0.228345
0.160114	0.0868689	0.151548	0.228345	0.149205	0.21903
0.151548	0.0187163	0.132488	0.21903	0.0764411	0.198364
0.132488	-0.00349533	0.0929235	0.198364	0.0528748	0.155707
0.0929235	-0.00782572	0.141199	0.155707	0.0482878	0.207799
0.141199	0.0163196	0.208656	0.207799	0.073895	0.281482
0.208656	0.104209	0.212792	0.281482	0.167843	0.286039
0.212792	0.0542046	0.211343	0.286039	0.114239	0.284442
0.211343	0.0610512	-0.0343417	0.284442	0.121554	0.020252
-0.0343417	-0.0241454	0.0060983	0.020252	0.0310226	0.0630454
0.0060983	0.0735078	0.144784	0.0630454	0.134881	0.211686
0.144784	0.0236404	0.019356	0.211686	0.0816747	0.0771208
0.019356	0.0697246	0.131809	0.0771208	0.13083	0.197629
0.131809	-0.0448577	0.0412111	0.197629	0.00915643	0.100378
0.0412111	0.0189117	0.089656	0.100378	0.0766487	0.152197
0.089656	0.0309473	0.0764051	0.152197	0.0894472	0.137984
0.0764051	0.0404671	0.0811969	0.137984	0.0995853	0.143121
0.0811969	0.057237	0.0710774	0.143121	0.117478	0.132278
0.0710774	0.0568465	0.0741649	0.132278	0.117061	0.135585
0.0741649	0.0842535	0.061919	0.135585	0.146399	0.122481
0.061919	0.0549386	0.0744288	0.122481	0.115023	0.135867
0.0744288	-0.0403634	0.0404905	0.135867	0.0138968	0.0996102
0.0404905	0.0564736	0.0522997	0.0996102	0.116662	0.112205
0.0522997	0.0484566	0.0857816	0.112205	0.108104	0.148038
0.0857816	-0.00670638	0.114748	0.148038	0.0494733	0.179199
0.114748	0.0802677	0.0406244	0.179199	0.142124	0.0997529
0.0406244	0.0692451	0.0678811	0.0997529	0.130317	0.128858
0.0678811	0.115876	0.138288	0.128858	0.180416	0.204644
0.138288	0.113521	0.152565	0.204644	0.177875	0.220135
0.152565	-0.0242493	0.0217706	0.220135	0.0309128	0.079687
0.0217706	0.01811	0.133354	0.079687	0.0757969	0.199301
0.133354	-0.0683018	0.0431208	0.199301	-0.0155354	0.102414
0.0431208	0.00619274	0.074231	0.102414	0.0631456	0.135655
0.074231	0.0410879	0.0200386	0.135655	0.100247	0.0778462
0.0200386	0.00924628	-0.0532605	0.0778462	0.0663854	0.000299513
-0.0532605	0.0268525	-0.0497787	0.000299513	0.0850905	0.00396855
-0.0497787	0.0450078	0.0339661	0.00396855	0.104426	0.0926606
0.0339661	0.000197673	0.107348	0.0926606	0.0567884	0.171223
0.107348	0.00161416	0.0599519	0.171223	0.05829	0.120379
0.0599519	0.0134261	0.136226	0.120379	0.0708221	0.202411
0.136226	0.0393413	0.182196	0.202411	0.0983857	0.25244
0.182196	-0.0167969	0.130278	0.25244	0.0387928	0.195973
0.130278	0.122282	0.125258	0.195973	0.18733	0.190545
0.125258	0.0449622	0.0757331	0.190545	0.104377	0.137264
0.0757331	0.0255901	0.090828	0.137264	0.0837478	0.153456
0.090828	0.0458184	0.108967	0.153456	0.10529	0.172968
0.153922	0.000408133	0.0722587	0.221609	0.0570115	0.133543
0.0856762	0.0567285	0.153922	0.147925	0.116935	0.221609
0.0404551	0.0917968	0.0856762	0.0995724	0.154496	0.147925
0.118069	0.0203217	0.0404551	0.182782	0.078147	0.0995724
0.114438	0.0620253	0.118069	0.178864	0.122595	0.182782
0.129477	0.105496	0.114438	0.195107	0.169229	0.178864
0.154745	0.0428016	0.129477	0.222504	0.102073	0.195107
0.171541	0.0459079	0.154745	0.240798	0.105386	0.222504
0.0925759	0.0651758	0.171541	0.155333	0.125964	0.240798
0.187113	0.0661379	0.0925759	0.257822	0.126993	0.155333
0.153106	0.117732	0.187113	0.220723	0.182419	0.257822
0.100896	0.114952	0.153106	0.164278	0.179419	0.220723
0.148902	0.0396993	0.100896	0.216156	0.0987671	0.164278
0.128389	0.00504941	0.148902	0.19393	0.0619328	0.216156
0.134892	0.0996391	0.128389	0.200966	0.162926	0.19393
0.152057	0.076519	0.134892	0.219583	0.138106	0.200966
0.211284	0.0538054	0.152057	0.284377	0.113813	0.219583
0.0981249	0.0344007	0.211284	0.161297	0.0931233	0.284377
0.10527	-0.0205439	0.0981249	0.168986	0.03483	0.161297
0.0657965	-0.00217734	0.10527	0.126628	0.0542713	0.168986
0.0338012	0.0992171	0.0657965	0.092485	0.162472	0.126628
0.126781	0.084033	0.0338012	0.192191	0.146162	0.092485
0.0314154	0.13601	0.126781	0.0899454	0.202177	0.192191
0.113322	0.0631079	0.0314154	0.177661	0.123752	0.0899454
0.111907	0.0412355	0.113322	0.176136	0.100404	0.177661
0.143324	0.0061005	0.111907	0.210103	0.0630477	0.176136
0.101478	0.0788281	0.143324	0.164904	0.140581	0.210103
0.105426	0.0314434	0.101478	0.169153	0.0899752	0.164904
0.117779	0.0621472	0.105426	0.182469	0.122725	0.169153
0.0826407	0.138476	0.117779	0.144669	0.204848	0.182469
0.108022	0.0384832	0.0826407	0.17195	0.0974714	0.144669
0.120822	0.0888952	0.108022	0.185754	0.15138	0.17195
0.0756949	-0.0310374	0.120822	0.137224	0.0237411	0.185754
0.118102	0.0727422	0.0756949	0.182818	0.134061	0.137224
0.0891525	0.0550673	0.118102	0.151657	0.11516	0.182818
0.0511394	0.115066	0.0891525	0.110967	0.179542	0.151657
0.0688832	0.00536629	0.0511394	0.12993	0.0622689	0.110967
0.197288	0.0664456	0.0688832	0.26898	0.127322	0.12993
0.119394	0.086258	0.197288	0.184212	0.14855	0.26898
0.164861	0.0269111	0.119394	0.233514	0.0851528	0.184212
0.141575	0.0955476	0.164861	0.208207	0.158527	0.233514
0.123856	0.107027	0.141575	0.189031	0.170878	0.208207
0.140158	0.0710022	0.123856	0.206671	0.132198	0.189031
0.125816	0.0231864	0.140158	0.191149	0.0811919	0.206671
0.090951	0.0930631	0.125816	0.153588	0.155857	0.191149
0.0396599	0.0874348	0.090951	0.0987251	0.149813	0.153588
0.146811	0.0414955	0.0396599	0.213886	0.100681	0.0987251
0.137961	-0.032781	0.146811	0.204289	0.0218999	0.213886
0.0812598	0.0711586	0.137961	0.143188	0.132365	0.204289
-0.00868398	0.0166909	0.0812598	0.047379	0.0742893	0.143188
0.0934082	0.0501204	-0.00868398	0.156227	0.109879	0.047379
0.124898	0.101986	0.0934082	0.190156	0.165451	0.156227
0.20948	0.128592	0.124898	0.282389	0.194149	0.190156
0.130319	0.0922743	0.20948	0.196017	0.155009	0.282389
0.0716299	0.118264	0.130319	0.13287	0.182993	0.196017
0.11356	0.0178255	0.0716299	0.177918	0.0754946	0.13287
0.0791632	0.0421107	0.11356	0.14094	0.101337	0.177918
0.150791	0.0677399	0.0791632	0.218208	0.128707	0.14094
0.099142	-0.0383658	0.150791	0.162391	0.0160046	0.218208
0.120275	0.102291	0.099142	0.185163	0.165779	0.162391
0.201037	-0.0364618	0.0541874	0.273099	0.018014	0.114221
0.130059	0.0204614	0.201037	0.195736	0.0782955	0.273099
0.123353	-0.0142887	0.130059	0.188487	0.0414465	0.195736
0.0190064	0.0246009	0.123353	0.0767494	0.082696	0.188487
0.0916389	0.0805921	0.0190064	0.154327	0.142472	0.0767494
0.0190345	-0.00699167	0.0916389	0.0767792	0.0491711	0.154327
-0.0292666	0.0578401	0.0190345	0.0256115	0.118122	0.0767792
0.203622	0.104689	-0.0292666	0.275941	0.16836	0.0256115
0.176874	0.163394	0.203622	0.246622	0.231916	0.275941
0.0893462	0.0613078	0.176874	0.151865	0.121828	0.246622
0.0641874	0.0411863	0.0893462	0.124907	0.100352	0.151865
0.103614	0.0142686	0.0641874	0.167203	0.0717168	0.124907
0.148072	0.107978	0.103614	0.215256	0.171901	0.167203
0.121835	0.0827328	0.148072	0.186847	0.144768	0.215256
0.0395623	0.101076	0.121835	0.0986211	0.164472	0.186847
0.129302	0.0789659	0.0395623	0.194918	0.140729	0.0986211
0.0728884	0.227791	0.129302	0.134218	0.302612	0.194918
0.116848	0.0736861	0.0728884	0.181464	0.135072	0.134218
0.170201	0.0926236	0.116848	0.239336	0.155385	0.181464
0.215242	0.147154	0.170201	0.288742	0.214258	0.239336
0.0801009	0.0603486	0.215242	0.141945	0.120803	0.288742
0.119571	-0.00441999	0.0801009	0.184403	0.0518951	0.141945
0.155291	0.0270649	0.119571	0.223098	0.0853164	0.184403
0.0923506	0.0555685	0.155291	0.155091	0.115696	0.223098
0.049188	0.0894399	0.0923506	0.108885	0.151965	0.155091
0.169299	0.111052	0.049188	0.238352	0.175214	0.108885
0.205617	0.159038	0.169299	0.278136	0.227174	0.238352
0.208124	0.150664	0.205617	0.280896	0.21807	0.278136
0.14187	0.193633	0.208124	0.208526	0.264969	0.280896
0.0877429	-0.0242998	0.149071	0.150143	0.0308595	0.21634
0.0706133	-0.0275756	0.0877429	0.131782	0.0273979	0.150143
0.0746524	0.0183005	0.0706133	0.136107	0.0759994	0.131782
0.137755	0.0965142	0.0746524	0.204066	0.159566	0.136107
0.207524	0.0530985	0.137755	0.280235	0.113058	0.204066
0.168103	0.0342135	0.207524	0.237048	0.092924	0.280235
0.151618	0.0294745	0.168103	0.219106	0.0878799	0.237048
0.128129	0.0941509	0.151618	0.193648	0.157026	0.219106
0.0917499	0.0386609	0.128129	0.154446	0.0976607	0.193648
0.12217	0.0254634	0.0917499	0.187209	0.0836131	0.154446
0.115324	-0.0561676	0.12217	0.17982	-0.00276284	0.187209
0.0539551	-0.00853767	0.115324	0.113973	0.047534	0.17982
-0.0107736	0.0299474	0.0539551	0.0451667	0.0883831	0.113973
-0.0244916	0.00606677	-0.0107736	0.0306567	0.0630119	0.0451667
0.112789	0.0446496	-0.0244916	0.177086	0.104044	0.0306567
0.0716674	0.0923288	0.112789	0.13291	0.155068	0.177086
0.207092	0.0776897	0.0716674	0.279759	0.139361	0.13291
0.0683525	0.0974723	0.207092	0.129362	0.160596	0.279759
0.151037	0.0346272	0.0683525	0.218475	0.0933645	0.129362
0.0707376	0.060122	0.151037	0.131915	0.12056	0.218475
0.00723304	0.101281	0.0707376	0.0642492	0.164692	0.131915
0.0762312	-0.0111891	0.00723304	0.137798	0.0447269	0.0642492
0.122219	0.0812533	0.0762312	0.187262	0.143181	0.137798
0.138714	0.147007	0.122219	0.205106	0.214099	0.187262
0.187036	0.0660876	0.138714	0.257737	0.126939	0.205106
0.156585	0.0225987	0.187036	0.224505	0.0805672	0.257737
0.118762	0.0190136	0.160074	0.18353	0.076757	0.228302
0.144963	-0.0114362	0.118762	0.211881	0.0444654	0.18353
0.0686534	0.0130948	0.144963	0.129684	0.0704704	0.211881
0.190938	0.125336	0.0686534	0.262014	0.19063	0.129684
0.215739	0.11956	0.190938	0.28929	0.184391	0.262014
0.116696	0.0183082	0.215739	0.181301	0.0760075	0.28929
0.151546	0.0513624	0.116696	0.219028	0.111205	0.181301
0.174803	0.0629521	0.151546	0.244359	0.123586	0.219028
0.123585	0.0823056	0.174803	0.188738	0.144309	0.244359
0.0622692	0.0413296	0.123585	0.122856	0.100504	0.188738
0.0861828	0.0654851	0.0622692	0.148469	0.126294	0.122856
0.104214	0.0796625	0.0861828	0.167849	0.141475	0.148469
0.15957	0.0139693	0.104214	0.227753	0.071399	0.167849
0.140361	0.147935	0.15957	0.20689	0.215106	0.227753
0.105464	0.0182736	0.140361	0.169194	0.0759707	0.20689
0.177059	0.045781	0.105464	0.246823	0.10525	0.169194
0.120892	0.0281772	0.177059	0.18583	0.0864996	0.246823
0.129554	0.0224096	0.120892	0.19519	0.0803662	0.18583
0.149961	0.0160806	0.129554	0.217306	0.0736412	0.19519
0.150331	0.129482	0.149961	0.217708	0.195112	0.217306
0.15241	0.115079	0.150331	0.219967	0.179556	0.217708
0.0987177	0.108972	0.15241	0.161935	0.172973	0.219967
0.1601	0.0284299	0.0987177	0.22833	0.0867685	0.161935
0.0132475	0.0595831	0.1601	0.0706325	0.119985	0.22833
0.0399124	0.0836084	0.0132475	0.0989941	0.145707	0.0706325
0.231046	0.0120457	0.0399124	0.306218	0.0693566	0.0989941
0.0879288	0.0945993	0.231046	0.150343	0.157507	0.306218
0.169444	-0.00904151	0.0879288	0.23851	0.0470005	0.150343
0.216959	0.00339598	0.169444	0.290636	0.0601793	0.23851
0.106473	0.0910123	0.216959	0.170281	0.153654	0.290636
0.146861	0.165385	0.106473	0.21394	0.234085	0.170281
0.176418	0.10962	0.146861	0.246123	0.173671	0.21394
0.213511	0.19621	0.176418	0.286832	0.267797	0.246123
0.202527	0.0452427	0.213511	0.274737	0.104676	0.286832
0.183157	0.121376	0.202527	0.253491	0.186351	0.274737
0.0289473	0.0531135	0.183157	0.087319	0.113074	0.253491
0.0752004	0.0100556	0.0289473	0.136694	0.0672443	0.087319
0.134021	-0.00360797	0.0752004	0.200024	0.0527554	0.136694
0.120964	0.021879	0.134021	0.185907	0.0798022	0.200024
0.0483403	0.0817666	0.120964	0.10798	0.143731	0.185907
0.145918	0.10016	0.0483403	0.212917	0.163487	0.10798
0.176734	0.0284786	0.145918	0.246468	0.0868202	0.212917
0.193645	0.0162228	0.176734	0.264981	0.0737922	0.246468
0.134538	-0.0150948	0.193645	0.200583	0.0405935	0.264981
0.18624	0.0320558	0.134538	0.256866	0.0906269	0.200583
0.138567	0.0470472	0.18624	0.204946	0.106601	0.256866
0.0953557	-0.0394116	0.138567	0.15832	0.0149011	0.204946
0.122089	0.0614365	0.0953557	0.187122	0.121965	0.15832
0.144403	-0.0164485	0.122089	0.211274	0.0391614	0.187122
0.143378	0.0738646	0.144403	0.210162	0.135263	0.211274
0.174163	0.15602	0.143378	0.24366	0.22389	0.210162
0.127068	0.0730688	0.174163	0.192501	0.134411	0.24366
0.244158	-0.0200785	0.127068	0.32078	0.0353221	0.192501
0.189857	0.0132104	0.244158	0.260828	0.0705931	0.32078
0.138337	0.0275261	0.189857	0.204697	0.085807	0.260828
0.1623	0.0315203	0.138337	0.230724	0.090057	0.204697
0.175124	0.013771	0.1623	0.24471	0.0711884	0.230724
0.179394	0.0744587	0.175124	0.249376	0.135899	0.24471
0.267072	0.0431082	0.179394	0.346374	0.1024	0.249376
0.155742	0.0891023	0.267072	0.223589	0.151603	0.346374
0.116688	0.0288056	0.158932	0.181291	0.0871681	0.227059
0.153325	0.0761073	0.116688	0.220961	0.137665	0.181291
-0.0301192	0.11189	0.00727571	0.0247108	0.176117	0.0642945
0.13532	0.0515927	-0.0301192	0.201429	0.111451	0.0247108
-0.0119263	0.0344748	0.13532	0.0439466	0.0932022	0.201429
0.0285349	0.0744526	-0.0119263	0.0868802	0.135893	0.0439466
0.0354497	-0.00934124	0.0285349	0.0942404	0.0466831	0.0868802
0.107253	-0.00627979	0.0354497	0.171121	0.0499251	0.0942404
0.109949	0.140286	0.107253	0.174025	0.20681	0.171121
0.0955521	0.0381307	0.109949	0.158531	0.0970958	0.174025
0.135688	0.0914774	0.0955521	0.201828	0.154153	0.158531
0.0376676	0.119773	0.135688	0.0966025	0.184622	0.201828
0.114934	0.0520787	0.0376676	0.1794	0.11197	0.0966025
0.147951	0.027536	0.114934	0.215124	0.0858175	0.1794
0.0916698	0.0848663	0.147951	0.15436	0.147056	0.215124
-0.00872796	0.0598543	0.0916698	0.0473325	0.120274	0.15436
0.1607	0.0478273	-0.00872796	0.228983	0.107433	0.0473325
0.142995	0.06718	0.1607	0.209746	0.128107	0.228983
0.0758768	0.0829419	0.142995	0.137418	0.144992	0.209746
0.133309	-0.0228023	0.0758768	0.199252	0.0324424	0.137418
0.075198	0.0412356	0.17805	0.136691	0.100404	0.247907
0.0420045	0.0658732	0.075198	0.101224	0.12671	0.136691
0.114137	0.0717357	0.0420045	0.17854	0.132983	0.101224
0.0894205	0.116046	0.114137	0.151944	0.180599	0.17854
0.0713079	-0.0377929	0.0894205	0.132525	0.0166092	0.151944
0.0991696	0.0599797	0.0713079	0.162421	0.120408	0.132525
0.0475448	0.0278185	0.0991696	0.107131	0.086118	0.162421
0.121843	0.0821994	0.0475448	0.186856	0.144196	0.107131
0.0955735	0.00258308	0.121843	0.158554	0.0593173	0.186856
0.0385312	0.0353276	0.0955735	0.0975225	0.0941103	0.158554
0.157428	0.0618781	0.0385312	0.225422	0.122437	0.0975225
0.12989	0.0746699	0.157428	0.195554	0.136125	0.225422
0.130463	0.119654	0.12989	0.196173	0.184493	0.195554
0.0671355	0.106524	0.130463	0.12806	0.170335	0.196173
0.156962	0.0990416	0.0671355	0.224916	0.162283	0.12806
0.152898	0.00972428	0.156962	0.220497	0.0668926	0.224916
0.13937	0.0216504	0.152898	0.205816	0.0795592	0.220497
0.0725132	-0.0539801	0.13937	0.133816	-0.00045862	0.205816
0.104339	0.002813	0.0725132	0.167983	0.0595611	0.133816
0.0966658	0.0751969	0.104339	0.159729	0.13669	0.167983
0.0460602	0.0344066	0.0966658	0.105548	0.0931295	0.159729
0.0869538	0.123941	0.0460602	0.149296	0.189122	0.105548
0.143244	0.122551	0.0869538	0.210017	0.18762	0.149296
0.0613606	0.0785025	0.143244	0.121884	0.140232	0.210017
0.0824637	0.0231879	0.0613606	0.144479	0.0811936	0.121884
0.0613564	0.0729439	0.0824637	0.12188	0.134277	0.144479
0.0665262	0.0396304	0.0613564	0.127408	0.0986937	0.12188
0.147311	0.0277806	0.0665262	0.214429	0.0860777	0.127408
0.139373	0.0826149	0.147311	0.20582	0.144641	0.214429
0.170895	0.0472368	0.139373	0.240093	0.106803	0.20582
0.127552	0.0933169	0.170895	0.193024	0.156129	0.240093
0.0397516	0.0964235	0.127552	0.0988228	0.159468	0.193024
0.131038	0.0652081	0.0397516	0.196795	0.125998	0.0988228
0.0256279	0.0701812	0.131038	0.083788	0.131319	0.196795
0.152228	0.0068417	0.0256279	0.219769	0.063834	0.083788
0.0828677	0.0704674	0.152228	0.144912	0.131626	0.219769
0.144067	0.093546	0.0828677	0.210909	0.156376	0.144912
-0.00998393	0.0827152	0.144067	0.0460027	0.144749	0.210909
0.140906	0.0159783	-0.00998393	0.207481	0.0735325	0.0460027
0.0500762	0.0357072	0.140906	0.109832	0.0945145	0.207481
0.104694	0.0951497	0.0500762	0.168365	0.158099	0.109832
0.0836464	0.089798	0.104694	0.145748	0.15235	0.168365
0.100636	0.0987887	0.0836464	0.163998	0.162011	0.145748
0.0632558	0.0561389	0.100636	0.12391	0.116305	0.163998
0.173146	0.0761522	0.0632558	0.24255	0.137713	0.12391
0.167331	0.066596	0.173146	0.236206	0.127483	0.24255
0.181049	0.10021	0.167331	0.251185	0.16354	0.236206
0.0138172	-0.0349741	0.00819792	0.0712374	0.0195844	0.0652729
0.00819792	0.0929942	0.155078	0.0652729	0.155783	0.222866
0.155078	0.0404958	0.125896	0.222866	0.0996159	0.191234
0.125896	0.00223214	0.0460197	0.191234	0.0589452	0.105505
0.0460197	0.105217	0.0943906	0.105505	0.168929	0.157283
0.0943906	0.0299265	0.126636	0.157283	0.0883609	0.192034
0.126636	0.059427	0.0520278	0.192034	0.119818	0.111915
0.0520278	0.0601652	0.159701	0.111915	0.120607	0.227896
0.159701	0.0108681	0.11926	0.227896	0.0681067	0.184068
0.11926	0.0866764	0.0968568	0.184068	0.148999	0.159934
0.0968568	0.105515	0.103685	0.159934	0.169249	0.167279
0.103685	0.0712941	0.104511	0.167279	0.13251	0.168169
0.104511	0.0932067	0.164142	0.168169	0.156011	0.232731
0.164142	-0.00387215	0.0789114	0.232731	0.0524755	0.14067
0.0789114	0.0172575	0.0486135	0.14067	0.0748913	0.108272
0.0486135	0.0382328	0.17047	0.108272	0.0972046	0.23963
0.17047	0.0233989	0.113841	0.23963	0.0814179	0.178221
0.113841	0.0889864	0.106591	0.178221	0.151478	0.170408
0.106591	0.0704589	0.0945651	0.170408	0.131616	0.157471
0.0945651	0.035039	0.0770697	0.157471	0.093803	0.138697
0.0770697	0.0300618	0.0917815	0.138697	0.0885049	0.15448
0.0917815	0.0341075	0.0611384	0.15448	0.0928111	0.121647
0.0611384	-0.010056	0.0684127	0.121647	0.0459264	0.129427
0.0684127	0.0292461	0.0615663	0.129427	0.0876369	0.122104
0.0615663	0.0907761	0.0914011	0.122104	0.1534	0.154071
0.0914011	0.0936263	0.123426	0.154071	0.156462	0.188566
0.123426	0.0502373	0.127344	0.188566	0.110004	0.192799
0.127344	0.0480435	0.139855	0.192799	0.107663	0.206342
0.139855	0.0651332	0.112788	0.206342	0.125918	0.177085
0.112788	0.0929622	0.145243	0.177085	0.155748	0.212185
0.145243	0.0271966	0.0802645	0.212185	0.0854565	0.142121
0.0802645	-0.00134481	0.0220704	0.142121	0.0551536	0.0800056
0.0220704	-0.0117358	0.111166	0.0800056	0.0441482	0.175336
0.111166	0.0590067	0.132928	0.175336	0.119369	0.198841
0.132928	0.112292	0.03988	0.198841	0.17655	0.0989597
0.03988	0.0187939	0.122306	0.0989597	0.0765235	0.187356
0.122306	0.00938204	0.0915723	0.187356	0.0665294	0.154255
0.0915723	0.15238	0.181013	0.154255	0.219934	0.251146
0.181013	0.100832	0.119699	0.251146	0.164209	0.184541
0.119699	-0.0405881	0.026279	0.184541	0.0136598	0.0844805
0.026279	0.00794989	0.0748668	0.0844805	0.0650097	0.136336
0.0748668	0.040197	0.141911	0.136336	0.0992974	0.208571
0.141911	-0.0139054	0.117555	0.208571	0.041852	0.182227
0.117555	0.0696969	0.073269	0.182227	0.130801	0.134625
0.073269	-0.00133497	0.132579	0.134625	0.055164	0.198463
0.132579	0.0411733	-0.00543049	0.198463	0.100338	0.0508247
-0.00543049	-0.0294593	0.0635204	0.0508247	0.0254079	0.124193
0.0635204	-0.0283242	0.0306732	0.124193	0.0266069	0.0891554
0.0306732	-0.010944	0.0574074	0.0891554	0.0449863	0.11766
0.0574074	-0.00736501	0.0346555	0.11766	0.0487757	0.0933946
0.0346555	0.0983972	0.0919863	0.0933946	0.16159	0.1547
0.0919863	0.0674846	0.096681	0.1547	0.128433	0.159745
0.096681	-0.0382915	0.119477	0.159745	0.0160831	0.184302
0.119477	0.0270627	0.0273392	0.184302	0.0853141	0.0856082
0.0273392	0.0539397	0.109499	0.0856082	0.113956	0.17354
0.109499	0.0755915	0.114396	0.17354	0.137113	0.178819
0.114396	0.0209486	0.0734765	0.178819	0.0788133	0.134847
0.0734765	0.0803987	0.216358	0.134847	0.142265	0.289973
0.216358	0.204749	0.207889	0.289973	0.277181	0.280637
0.207889	0.0836233	0.119166	0.280637	0.145723	0.183966
0.119166	0.00173192	0.126471	0.183966	0.0584149	0.191856
0.126471	-0.0422053	0.0705019	0.191856	0.0119538	0.131662
0.0705019	0.100093	0.152413	0.131662	0.163414	0.21997
0.152413	0.00410188	0.020611	0.21997	0.0609279	0.0784545
0.0617757	0.0243613	0.108275	0.122328	0.0824412	0.172222
0.0985644	0.13721	0.0617757	0.16177	0.203477	0.122328
0.0812428	0.0475172	0.0985644	0.14317	0.107102	0.16177
0.135671	0.0303882	0.0812428	0.20181	0.0888521	0.14317
0.086039	0.0328582	0.135671	0.148315	0.0914811	0.20181
0.126239	0.0602454	0.086039	0.191606	0.120692	0.148315
0.188545	0.125338	0.126239	0.25939	0.190631	0.191606
0.164977	0.133038	0.188545	0.23364	0.198959	0.25939
0.139377	0.191172	0.164977	0.205824	0.262269	0.23364
0.00425834	0.0074666	0.139377	0.0610938	0.064497	0.205824
0.145062	0.084536	0.00425834	0.211989	0.146702	0.0610938
0.187999	0.008628	0.145062	0.258792	0.0657293	0.211989
0.0930232	0.127689	0.187999	0.155814	0.193173	0.258792
0.111473	0.114019	0.0930232	0.175668	0.178412	0.155814
0.102181	0.125957	0.111473	0.165661	0.191301	0.175668
0.0761008	0.103342	0.102181	0.137658	0.16691	0.165661
0.0225634	0.0659387	0.0761008	0.0805297	0.12678	0.137658
0.0528225	0.0626047	0.0225634	0.112763	0.123214	0.0805297
0.124996	0.0707333	0.0528225	0.190263	0.13191	0.112763
0.164548	0.101314	0.124996	0.233174	0.164728	0.190263
0.100111	0.0264687	0.164548	0.163434	0.0846823	0.233174
0.134986	0.0393965	0.100111	0.201067	0.0984445	0.163434
0.049449	0.0952517	0.134986	0.109163	0.158209	0.201067
0.122948	-0.0141301	0.049449	0.18805	0.0416143	0.109163
0.118098	0.138535	0.122948	0.182813	0.204912	0.18805
0.12571	0.186693	0.118098	0.191034	0.257362	0.182813
0.241447	0.101026	0.12571	0.317763	0.164418	0.191034
0.146623	0.00802048	0.184158	0.213682	0.0650846	0.254587
0.217694	0.113482	0.146623	0.291448	0.177833	0.213682
0.207187	0.146271	0.217694	0.279864	0.2133	0.291448
0.133256	0.0717093	0.207187	0.199195	0.132955	0.279864
0.11692	0.0778272	0.133256	0.181542	0.139508	0.199195
0.0551062	0.0312158	0.11692	0.115202	0.0897329	0.181542
0.114435	-0.0162492	0.0551062	0.178861	0.0393722	0.115202
0.139964	0.122969	0.114435	0.20646	0.188072	0.178861
0.130249	0.057011	0.139964	0.195942	0.117236	0.20646
0.0428871	0.0977079	0.130249	0.102165	0.160849	0.195942
0.0796396	-0.0299691	0.0428871	0.141451	0.0248693	0.102165
0.219729	-0.0114161	0.0796396	0.293695	0.0444866	0.141451
0.224946	0.137156	0.219729	0.299463	0.203418	0.293695
0.168744	0.133893	0.224946	0.237747	0.199885	0.299463
0.177337	0.114796	0.168744	0.247127	0.17925	0.237747
0.12562	0.0267307	0.177337	0.190936	0.0849609	0.247127
0.0659274	-0.0261403	0.12562	0.126768	0.0289144	0.190936
0.137038	-0.103211	0.0659274	0.20329	-0.0521972	0.126768
-0.0156328	0.0220303	0.137038	0.0400243	0.079963	0.20329
-0.0557677	-0.0560825	0.0348582	-0.00234165	-0.00267319	0.0936104
-0.0739248	0.0240383	-0.0557677	-0.0214489	0.0820977	-0.00234165
0.042104	2.0836e-05	-0.0739248	0.10133	0.056601	-0.0214489
0.115108	0.0549302	0.042104	0.179587	0.115014	0.10133
0.0400306	0.0531146	0.115108	0.0991201	0.113075	0.179587
0.130905	0.083009	0.0400306	0.196651	0.145064	0.0991201
0.163669	0.0426141	0.130905	0.232215	0.101874	0.196651
0.0995474	0.0762592	0.163669	0.162827	0.137828	0.232215
0.122736	0.122453	0.0995474	0.187821	0.187514	0.162827
0.104857	-0.100097	0.122736	0.168541	-0.0489311	0.187821
0.0638362	0.103208	0.104857	0.124531	0.166765	0.168541
0.0887911	0.0564824	0.0638362	0.151269	0.116672	0.124531
0.138112	0.0581269	0.0887911	0.204453	0.118428	0.151269
0.192358	0.0646749	0.138112	0.263571	0.125428	0.204453
0.0509105	0.134948	0.192358	0.110723	0.201026	0.263571
0.14017	0.0452572	0.112837	0.206683	0.104692	0.177138
-0.000623693	0.0962007	0.14017	0.0559178	0.159229	0.206683
0.135048	0.03736	-0.000623693	0.201135	0.0962749	0.0559178
0.167299	0.1325	0.135048	0.236171	0.198377	0.201135
0.168714	0.0671846	0.167299	0.237714	0.128112	0.236171
0.0323425	0.0851797	0.168714	0.0909322	0.147392	0.237714
0.0174404	-0.00205129	0.0323425	0.0750856	0.0544049	0.0909322
0.119318	0.0245842	0.0174404	0.18413	0.0826781	0.0750856
0.150238	0.0337757	0.119318	0.217607	0.0924579	0.18413
0.100931	0.108836	0.150238	0.164316	0.172826	0.217607
0.0460121	0.0720902	0.100931	0.105497	0.133363	0.164316
0.0939071	0.108394	0.0460121	0.156764	0.17235	0.105497
0.0649728	0.0289315	0.0939071	0.125747	0.0873021	0.156764
0.11427	0.0699446	0.0649728	0.178683	0.131066	0.125747
0.0933268	0.0245228	0.11427	0.15614	0.0826128	0.178683
0.0970015	0.00158748	0.0933268	0.16009	0.0582618	0.15614
0.14766	0.0449944	0.0970015	0.214808	0.104411	0.16009
0.0110145	0.0243041	0.14766	0.068262	0.0823804	0.214808
0.0175056	-0.0267354	0.0110145	0.0751548	0.0282856	0.068262
0.0253363	0.0563832	0.0175056	0.083478	0.116566	0.0751548
0.105724	0.0435955	0.0253363	0.169474	0.10292	0.083478
0.161317	0.0327277	0.0313789	0.229654	0.0913421	0.0899064
0.0571166	0.0642029	0.161317	0.117349	0.124923	0.229654
0.16638	0.0547456	0.0571166	0.23517	0.114817	0.117349
0.150922	0.113581	0.16638	0.21835	0.17794	0.23517
0.134812	0.126403	0.150922	0.20088	0.191783	0.21835
0.14339	0.0188133	0.134812	0.210175	0.0765442	0.20088
0.168103	0.136652	0.14339	0.237048	0.202872	0.210175
0.0853363	0.0236026	0.168103	0.147561	0.0816344	0.237048
-0.0429951	0.0816992	0.0853363	0.0111208	0.143659	0.147561
0.0111015	-0.0435918	-0.0429951	0.0683544	0.0104914	0.0111208
0.0215358	0.0727569	0.0111015	0.0794374	0.134077	0.0683544
0.00745619	0.0437061	0.0215358	0.0644859	0.103038	0.0794374
0.0756903	0.0242051	0.00745619	0.137219	0.0822751	0.0644859
0.0462552	0.0452876	0.0756903	0.105756	0.104724	0.137219
0.0649664	0.127855	0.0462552	0.12574	0.193353	0.105756
0.132074	0.0284073	0.0649664	0.197916	0.0867444	0.12574
0.151265	0.0385159	0.132074	0.218722	0.0975062	0.197916
0.0776638	0.143028	0.151265	0.139333	0.209782	0.218722
0.0685277	0.0533479	0.0776638	0.12955	0.113324	0.139333
-0.0284679	-0.00167463	0.0685277	0.0264551	0.054804	0.12955
0.100308	-0.015289	-0.0284679	0.163645	0.0403881	0.0264551
0.139624	0.0479774	0.100308	0.206092	0.107593	0.163645
0.100822	0.0414314	0.139624	0.164198	0.100613	0.206092
0.173431	0.0567237	0.100822	0.24286	0.11693	0.164198
0.215299	0.0537401	0.173431	0.288804	0.113743	0.24286
0.239739	0.131078	0.215299	0.315865	0.196838	0.288804
0.116824	0.159159	0.239739	0.181438	0.227305	0.315865
0.181762	0.129201	0.116824	0.251965	0.194808	0.181438
0.174065	0.160567	0.181762	0.243554	0.228838	0.251965
0.163802	0.0703724	0.174065	0.232361	0.131524	0.243554
0.0562136	0.0285912	0.163802	0.116385	0.0869401	0.232361
-0.0156517	0.072737	0.0562136	0.0400043	0.134055	0.116385
0.0763253	0.0391988	-0.0156517	0.137899	0.0982338	0.0400043
0.131087	0.0987135	0.0763253	0.196848	0.16193	0.137899
0.129194	0.0946581	0.131087	0.194801	0.157571	0.196848
-0.012181	0.116404	0.129194	0.0436769	0.180985	0.194801
0.129431	0.0555764	0.127963	0.195057	0.115704	0.19347
0.13966	0.0352564	0.129431	0.20613	0.0940345	0.195057
0.0847927	0.0730628	0.13966	0.146977	0.134404	0.20613
0.163765	0.0659385	0.0847927	0.23232	0.126779	0.146977
0.208299	0.0647715	0.163765	0.281089	0.125531	0.23232
0.158438	0.158951	0.167136	0.226521	0.227079	0.235994
0.217957	0.136793	0.158438	0.291738	0.203024	0.226521
0.105589	0.12662	0.217957	0.169328	0.192017	0.291738
0.252124	0.192581	0.105589	0.329656	0.263815	0.169328
0.16639	0.120436	0.252124	0.23518	0.185337	0.329656
0.183942	0.111601	0.16639	0.25435	0.175806	0.23518
0.158576	0.0645127	0.183942	0.226671	0.125254	0.25435
0.199428	0.042217	0.158576	0.271331	0.10145	0.226671
0.165152	0.128561	0.199428	0.233831	0.194116	0.271331
0.106465	0.123136	0.165152	0.170272	0.188252	0.233831
-0.00212612	0.0893035	0.106465	0.0543256	0.151819	0.170272
0.0725153	0.103257	-0.00212612	0.133818	0.166818	0.0543256
0.130751	-0.0527707	0.0725153	0.196485	0.000815559	0.133818
0.0882024	0.0959637	0.130751	0.150637	0.158974	0.196485
0.17118	0.132854	0.0882024	0.240405	0.19876	0.150637
0.176382	0.0674009	0.17118	0.246083	0.128344	0.240405
0.173928	0.0807141	0.176382	0.243403	0.142603	0.246083
0.137767	0.126258	0.173928	0.20408	0.191626	0.243403
0.240978	0.140251	0.13568	0.317243	0.206772	0.20182
0.228802	0.0607272	0.240978	0.303731	0.121207	0.317243
0.210788	0.120426	0.228802	0.283831	0.185326	0.303731
0.179847	0.123111	0.210788	0.24987	0.188226	0.283831
0.111812	0.186531	0.179847	0.176034	0.257184	0.24987
0.153865	-0.000626916	0.111812	0.221548	0.0559144	0.176034
0.119645	-0.0374216	0.153865	0.184482	0.0170011	0.221548
0.21933	0.027038	0.119645	0.293255	0.0852878	0.184482
0.0271807	0.08417	0.21933	0.0854396	0.146309	0.293255
0.181047	-0.0145633	0.0271807	0.251183	0.0411559	0.0854396
0.111287	0.0123284	0.181047	0.175467	0.0696567	0.251183
0.0803967	0.0146388	0.111287	0.142263	0.0721099	0.175467
0.207999	0.0961005	0.0803967	0.280758	0.159121	0.142263
0.0515531	0.196396	0.207999	0.111409	0.268001	0.280758
0.0623593	0.141642	0.0515531	0.122952	0.20828	0.111409
0.139323	0.0676742	0.0623593	0.205765	0.128636	0.122952
0.137452	0.118583	0.139323	0.203739	0.183336	0.205765
0.165066	0.0720644	0.137452	0.233738	0.133335	0.203739
0.134869	0.146393	0.165066	0.200941	0.213433	0.233738
0.176712	0.160914	0.134869	0.246444	0.229216	0.200941
0.171695	0.15376	0.176712	0.240966	0.221433	0.246444
0.149721	0.163391	0.171695	0.217045	0.231913	0.240966
0.250763	0.0790155	0.149721	0.328137	0.140782	0.217045
0.116461	0.153974	0.250763	0.181046	0.221666	0.328137
0.280382	0.19704	0.116461	0.361334	0.268708	0.181046
0.108584	0.153907	0.280382	0.172555	0.221594	0.361334
0.173389	0.168424	0.108584	0.242815	0.237398	0.172555
0.203296	0.163596	0.173389	0.275582	0.232136	0.242815
0.115526	0.0947213	0.203296	0.180038	0.157639	0.275582
0.0530945	0.12726	0.115526	0.113054	0.192709	0.180038
0.0566344	0.109861	0.0530945	0.116834	0.173931	0.113054
0.111368	0.048385	0.0566344	0.175555	0.108028	0.116834
0.033268	0.093925	0.111368	0.0919173	0.156783	0.175555
0.161444	0.0503915	0.033268	0.229792	0.110169	0.0919173
0.0658421	0.178043	0.161444	0.126676	0.247898	0.229792
-0.0270284	0.119742	0.0658421	0.027976	0.184587	0.126676
0.166496	0.119092	-0.0270284	0.235296	0.183886	0.027976
0.171971	-0.100979	0.166496	0.241268	-0.0498563	0.235296
0.144345	0.143969	0.171971	0.21121	0.210802	0.241268
0.0906462	0.123409	0.144345	0.153261	0.188548	0.21121
0.11237	0.0833725	0.0906462	0.176634	0.145454	0.153261
0.0713026	0.102689	0.11237	0.13252	0.166207	0.176634
0.0659567	0.0579525	0.0713026	0.126799	0.118242	0.13252
0.158673	0.132224	0.573983	0.226776	0.198078	0.732541
0.230858	0.0682322	0.157371	0.306009	0.129233	0.22536
0.125325	0.0880091	0.230858	0.190618	0.150429	0.306009
0.138224	0.0959728	0.125325	0.204575	0.158984	0.190618
0.223402	0.106857	0.138224	0.297755	0.170694	0.204575
0.0562826	0.1134	0.223402	0.116458	0.177745	0.297755
0.192588	0.0548127	0.0562826	0.263822	0.114889	0.116458
0.169365	0.0924241	0.192588	0.238424	0.15517	0.263822
-0.0122232	0.156484	0.169365	0.0436323	0.224396	0.238424
0.142212	0.0554538	0.0932559	0.208897	0.115573	0.156064
0.158812	0.130736	0.142212	0.226928	0.196469	0.208897
0.129216	0.123831	0.158812	0.194825	0.189003	0.226928
0.241835	0.131788	0.129216	0.318195	0.197607	0.194825
0.0120581	0.128287	0.241835	0.0693698	0.19382	0.318195
0.126167	0.10285	0.0120581	0.191527	0.16638	0.0693698
0.0878653	0.0522373	0.126167	0.150275	0.112139	0.191527
0.04249	0.0628413	0.0878653	0.101741	0.123467	0.150275
0.00119599	0.0422414	0.04249	0.0578467	0.101476	0.101741
0.0397255	0.0315959	0.00119599	0.098795	0.0901375	0.0578467
0.151845	0.0809127	0.0397255	0.219352	0.142816	0.098795
0.138388	0.0991199	0.151845	0.204753	0.162367	0.219352
0.0582176	0.0826639	0.138388	0.118525	0.144694	0.204753
0.0321719	0.0964867	0.0582176	0.0907505	0.159536	0.118525
0.177374	0.0940667	0.0321719	0.247167	0.156935	0.0907505
0.0232284	0.160314	0.177374	0.0812366	0.228563	0.247167
0.175554	0.114346	0.0232284	0.245179	0.178765	0.0812366
0.164367	0.105213	0.175554	0.232976	0.168924	0.245179
0.15439	0.193637	0.164367	0.222118	0.264973	0.232976
0.119311	0.0895565	0.15439	0.184122	0.15209	0.222118
0.155127	0.0749132	0.119311	0.22292	0.136386	0.184122
0.191888	0.0947889	0.155127	0.263054	0.157711	0.22292
0.0989454	0.103654	0.191888	0.16218	0.167246	0.263054
0.0972219	0.0833818	0.0989454	0.160326	0.145464	0.16218
0.116671	0.115849	0.0972219	0.181274	0.180386	0.160326
0.095739	0.141369	0.116671	0.158732	0.207983	0.181274
0.121281	0.0993307	0.095739	0.186249	0.162594	0.158732
0.216483	0.126873	0.121281	0.290111	0.192291	0.186249
0.149636	0.161501	0.216483	0.216954	0.229854	0.290111
0.121354	0.173191	0.149636	0.186328	0.242599	0.216954
0.13762	0.156072	0.121354	0.203921	0.223948	0.186328
0.175552	0.183177	0.13762	0.245177	0.253513	0.203921
0.252486	0.130094	0.175552	0.33006	0.195774	0.245177
0.157004	0.163303	0.252486	0.224961	0.231817	0.33006
0.193699	0.0463558	0.30231	0.265041	0.105863	0.386147
0.136281	0.102768	0.193699	0.20247	0.166293	0.265041
0.166745	0.200731	0.136281	0.235567	0.272763	0.20247
0.191311	0.128871	0.166745	0.262422	0.194451	0.235567
0.214608	0.210968	0.191311	0.288042	0.284029	0.262422
0.220166	0.105146	0.214608	0.294179	0.168852	0.288042
0.0994925	0.0577759	0.220166	0.162768	0.118053	0.294179
0.247648	0.159454	0.0994925	0.324666	0.227627	0.162768
0.0127057	0.0751196	0.247648	0.0700574	0.136607	0.324666
0.273714	0.0990124	0.0127057	0.353831	0.162252	0.0700574
0.0406651	0.121764	0.273714	0.0997963	0.186771	0.353831
0.158993	-0.0872627	0.0406651	0.227125	-0.0354629	0.0997963
0.099364	0.072645	0.158993	0.16263	0.133957	0.227125
0.116118	0.068581	0.099364	0.180677	0.129607	0.16263
0.216855	0.0729093	0.116118	0.290522	0.13424	0.180677
0.15128	0.095121	0.270803	0.218738	0.158068	0.35056
0.134387	0.0623452	0.15128	0.200419	0.122937	0.218738
0.167519	0.103965	0.134387	0.236411	0.167581	0.200419
0.234862	0.130611	0.167519	0.310449	0.196333	0.236411
-0.0337194	0.0179792	0.234862	0.020909	0.0756579	0.310449
0.141395	0.0947332	-0.0337194	0.208011	0.157651	0.020909
0.166839	0.0341486	0.141395	0.23567	0.0928549	0.208011
0.136495	0.0728567	0.166839	0.202701	0.134184	0.23567
0.0986644	0.103206	0.136495	0.161878	0.166763	0.202701
0.12587	0.117727	0.0986644	0.191206	0.182413	0.161878
0.197845	0.0750732	0.12587	0.269592	0.136558	0.191206
0.198101	0.0342835	0.197845	0.269873	0.0929985	0.269592
0.148866	0.109461	0.198101	0.216117	0.1735	0.269873
0.109819	0.216792	0.148866	0.173885	0.290452	0.216117
0.12986	0.0326794	0.109819	0.19552	0.0912907	0.173885
0.253616	0.194328	0.12986	0.33132	0.265731	0.19552
0.104636	0.100439	0.253616	0.168303	0.163787	0.33132
0.140458	0.0601301	0.104636	0.206995	0.120569	0.168303
0.156113	0.162575	0.140458	0.223991	0.231024	0.206995
0.120666	0.0735314	0.156113	0.185585	0.134906	0.223991
0.165628	0.0702198	0.120666	0.23435	0.13136	0.185585
0.0996362	0.126633	0.165628	0.162923	0.192032	0.23435
0.20223	0.111037	0.0996362	0.27441	0.175198	0.162923
0.0397001	0.0860533	0.20223	0.098768	0.14833	0.27441
0.190816	0.0502006	0.0397001	0.26188	0.109965	0.098768
0.122881	0.038732	0.190816	0.187977	0.0977364	0.26188
0.108333	0.078261	0.122881	0.172284	0.139973	0.187977
0.0794767	0.100787	0.108333	0.141276	0.16416	0.172284
0.180638	0.0783095	0.0794767	0.250735	0.140025	0.141276
0.218975	0.145248	0.180638	0.292863	0.21219	0.250735
0.139987	0.112423	0.218975	0.206485	0.176692	0.292863
0.247544	-0.0399781	0.139987	0.324549	0.0143034	0.206485
0.0802223	0.0847562	0.247544	0.142076	0.146938	0.324549
0.0915875	0.0117175	0.0802223	0.154272	0.0690083	0.142076
0.206764	0.109629	0.0915875	0.279398	0.17368	0.154272
0.038516	0.126237	0.206764	0.0975064	0.191603	0.279398
0.104843	0.188397	0.038516	0.168526	0.259228	0.0975064
0.057168	0.161651	0.104843	0.117404	0.230018	0.168526
0.0542029	0.141474	0.057168	0.114237	0.208097	0.117404
0.134649	0.152881	0.0542029	0.200703	0.220478	0.114237
0.114835	0.143795	0.134649	0.179293	0.210614	0.200703
0.182179	0.177829	0.114835	0.25242	0.247665	0.179293
0.0904701	0.0229429	0.182179	0.153071	0.0809331	0.25242
0.183721	0.117341	0.0904701	0.254108	0.181996	0.153071
0.154367	0.00831028	0.183721	0.222094	0.0653921	0.254108
0.126897	0.113278	0.154367	0.192316	0.177614	0.222094
0.0992033	0.12233	0.126897	0.162457	0.187382	0.192316
0.06497	0.0441645	0.0992033	0.125744	0.103526	0.162457
0.0962021	0.113716	0.204228	0.15923	0.178086	0.276607
0.204228	0.0572169	0.0642895	0.276607	0.117456	0.125016
0.0642895	0.035633	0.0223694	0.125016	0.0944355	0.0803235
0.0223694	0.170141	0.163471	0.0803235	0.23927	0.232
0.163471	0.0203777	0.0157681	0.232	0.0782066	0.0733093
0.0157681	0.0572503	0.190316	0.0733093	0.117492	0.261331
0.190316	0.0321559	0.12531	0.261331	0.0907335	0.190601
0.12531	0.126273	0.0702459	0.190601	0.191643	0.131388
0.0702459	0.0931382	0.216413	0.131388	0.155937	0.290034
0.216413	0.0982581	0.142504	0.290034	0.161441	0.209213
0.142504	0.110023	0.0263351	0.209213	0.174106	0.0845402
0.0263351	0.109049	0.179826	0.0845402	0.173056	0.249848
0.179826	0.157365	0.141436	0.249848	0.225354	0.208056
0.141436	0.0902834	0.148262	0.208056	0.152871	0.215461
0.148262	0.0860017	0.134617	0.215461	0.148275	0.200669
0.134617	0.103154	0.189056	0.200669	0.166708	0.259951
0.189056	0.0686047	-0.00129341	0.259951	0.129632	0.055208
-0.00129341	0.0800226	0.204465	0.055208	0.141861	0.276869
0.204465	0.0683491	0.116528	0.276869	0.129358	0.181119
0.116528	0.0807872	0.136538	0.181119	0.142681	0.202748
0.136538	0.11895	0.141098	0.202748	0.183733	0.207689
0.141098	0.00615847	0.0676132	0.207689	0.0631092	0.128571
0.0676132	0.0453329	0.0763886	0.128571	0.104772	0.137967
0.0763886	-0.0240157	0.113135	0.137967	0.0311598	0.17746
0.113135	-0.0290662	0.0755511	0.17746	0.0258232	0.137069
0.0755511	0.0484695	0.22677	0.137069	0.108118	0.301481
0.22677	0.0348753	0.0840869	0.301481	0.0936287	0.14622
0.0840869	0.0771527	0.132959	0.14622	0.138785	0.198873
0.132959	0.0479902	0.0665831	0.198873	0.107607	0.127469
0.0665831	0.114822	0.18538	0.127469	0.179278	0.255924
0.18538	0.160857	0.180054	0.255924	0.229154	0.250097
0.180054	0.107943	0.216748	0.250097	0.171864	0.290404
0.216748	0.0197451	0.182627	0.290404	0.0775343	0.252911
0.182627	0.080153	0.179733	0.252911	0.142001	0.249745
0.179733	0.107139	0.174997	0.249745	0.170999	0.244571
0.174997	0.0751892	0.129974	0.244571	0.136682	0.195644
0.129974	0.122471	0.183689	0.195644	0.187534	0.254073
0.183689	0.200073	0.215693	0.254073	0.272039	0.289239
0.215693	-0.0105946	0.221888	0.289239	0.0453562	0.296081
0.221888	0.114398	0.199033	0.296081	0.178822	0.270897
0.199033	0.131802	0.16989	0.270897	0.197621	0.238997
0.16989	0.183603	0.106887	0.238997	0.253979	0.170726
0.106887	0.076574	0.24675	0.170726	0.138165	0.323665
0.24675	-0.000119598	0.145057	0.323665	0.0564521	0.211983
0.145057	0.101295	0.149339	0.211983	0.164707	0.216631
0.149339	0.118848	0.113429	0.216631	0.183622	0.177776
0.113429	0.110091	0.116117	0.177776	0.174178	0.180675
0.116117	0.158841	0.202358	0.180675	0.22696	0.274552
0.202358	0.126071	0.164781	0.274552	0.191424	0.233427
0.164781	0.124712	0.168226	0.233427	0.189956	0.237182
0.168226	0.144524	0.196488	0.237182	0.211405	0.268102
0.196488	0.0296292	0.0808832	0.268102	0.0880445	0.142784
0.0808832	0.12114	0.090451	0.142784	0.186097	0.153051
0.090451	0.0316511	0.182426	0.153051	0.0901962	0.252691
0.159502	0.146437	0.188824	0.227678	0.21348	0.259696
0.188824	0.0449595	0.11905	0.259696	0.104374	0.18384
0.140373	0.0524154	0.0896945	0.206904	0.112329	0.152239
0.0896945	0.0226465	0.287934	0.152239	0.080618	0.369856
0.287934	0.179147	0.145607	0.369856	0.249105	0.212579
0.145607	-0.0729143	0.209878	0.212579	-0.0203864	0.282828
0.209878	-0.0244121	0.163593	0.282828	0.0307408	0.232133
0.163593	0.168147	0.094492	0.232133	0.237095	0.157392
0.094492	0.171117	0.24428	0.157392	0.240336	0.320915
0.24428	0.137229	0.234479	0.320915	0.203497	0.310025
0.234479	0.0209645	0.167879	0.310025	0.0788302	0.236803
0.167879	0.0614571	0.181907	0.236803	0.121987	0.252123
0.181907	0.0315125	0.19321	0.252123	0.0900487	0.264505
0.19321	0.108328	0.113141	0.264505	0.172279	0.177466
0.113141	0.206649	0.214974	0.177466	0.279272	0.288445
0.214974	0.147595	0.154024	0.288445	0.214737	0.221721
0.154024	0.094653	0.112638	0.221721	0.157565	0.176924
0.112638	0.145022	0.105417	0.176924	0.211945	0.169144
0.105417	0.168271	0.272161	0.169144	0.237231	0.352086
0.272161	0.192982	0.128158	0.352086	0.264254	0.19368
0.128158	0.171698	0.174812	0.19368	0.24097	0.244369
0.174812	0.061889	0.03111	0.244369	0.122449	0.0896203
0.03111	0.0300945	0.0772475	0.0896203	0.0885396	0.138887
0.0772475	0.015229	0.080208	0.138887	0.0727367	0.14206
0.080208	0.0707713	0.118658	0.14206	0.131951	0.183417
0.118658	0.00323159	0.0943908	0.183417	0.060005	0.157283
0.0943908	0.0798002	0.188984	0.157283	0.141623	0.259872
0.188984	0.0553599	0.0107681	0.259872	0.115473	0.0680004
0.0107681	0.0964059	0.108686	0.0680004	0.159449	0.172665
0.108686	0.11573	0.108643	0.172665	0.180258	0.172618
0.108643	0.08497	0.146539	0.172618	0.147168	0.213591
0.146539	0.0598277	0.0480784	0.213591	0.120246	0.107701
0.0480784	0.0871739	0.131504	0.107701	0.149533	0.197299
0.131504	0.0407326	0.187946	0.197299	0.0998682	0.258734
0.187946	0.0544735	0.188822	0.258734	0.114526	0.259694
0.188822	0.0966052	0.125091	0.259694	0.159663	0.190365
0.125091	0.223862	0.194964	0.190365	0.298264	0.266429
0.194964	0.0923102	0.22113	0.266429	0.155048	0.295243
0.22113	0.0392857	0.191939	0.295243	0.0983263	0.263111
0.191939	0.0706838	0.167435	0.263111	0.131857	0.23632
0.167435	-0.017046	0.0638136	0.23632	0.0385293	0.124507
0.0638136	0.0853405	0.0771155	0.124507	0.147565	0.138746
0.0771155	0.0828257	0.217684	0.138746	0.144867	0.291437
0.217684	0.188352	0.18571	0.291437	0.259179	0.256286
0.18571	-0.0610696	0.104987	0.256286	-0.0079246	0.168681
0.104987	0.0363154	0.0886229	0.168681	0.0951622	0.151088
0.0886229	-0.000661317	0.0379448	0.151088	0.055878	0.0968978
0.0379448	0.00300213	0.123612	0.0968978	0.0597617	0.188767
0.123612	0.1615	0.187573	0.188767	0.229854	0.258325
0.187573	0.116081	0.121883	0.258325	0.180637	0.186899
0.121883	0.173318	0.137525	0.186899	0.242738	0.203818
0.137525	0.0694732	0.107984	0.203818	0.130561	0.171908
0.107984	0.0302518	0.120507	0.171908	0.0887071	0.185414
0.120507	0.153852	0.208762	0.185414	0.221533	0.281598
0.208762	0.15142	0.203371	0.281598	0.218891	0.275665
0.203371	0.0843638	0.144849	0.275665	0.146517	0.211758
0.144849	0.0855385	0.192823	0.211758	0.147778	0.26408
0.192823	0.0687201	0.117891	0.26408	0.129755	0.18259
0.117891	0.090433	0.16158	0.18259	0.153032	0.22994
0.16158	0.0934961	0.138757	0.22994	0.156322	0.205152
0.138757	0.105528	0.159535	0.205152	0.169263	0.227714
0.159535	0.104039	0.115256	0.227714	0.16766	0.179747
0.115256	0.0894381	0.0987757	0.179747	0.151963	0.161997
0.0987757	0.21007	0.0997926	0.161997	0.283039	0.163091
0.0997926	0.0899516	0.0965581	0.163091	0.152515	0.159613
0.0965581	-0.0226655	0.119558	0.159613	0.032587	0.184389
0.119558	0.0617262	0.100237	0.184389	0.122275	0.163569
0.100237	0.0489303	0.223606	0.163569	0.10861	0.297981
0.223606	0.0649648	0.0664457	0.297981	0.125738	0.127322
0.0664457	0.0886331	0.122959	0.127322	0.151099	0.188061
0.122959	0.10898	0.197603	0.188061	0.172981	0.269326
0.197603	0.165539	0.129868	0.269326	0.234253	0.195529
0.129868	0.137849	0.0838922	0.195529	0.204169	0.146011
0.0838922	0.170296	0.0848057	0.146011	0.239439	0.146991
0.0848057	0.0951655	0.129846	0.146991	0.158116	0.195505
0.129846	0.129155	0.19671	0.195505	0.194758	0.268345
0.19671	0.143764	0.236695	0.268345	0.21058	0.312485
0.236695	0.124103	0.149745	0.312485	0.189297	0.217072
0.149745	0.108852	0.113715	0.217072	0.172843	0.178085
0.113715	0.117477	0.0920468	0.178085	0.182143	0.154765
0.171059	0.00415339	0.20751	0.240272	0.0609825	0.28022
0.20751	-0.00823401	0.10275	0.28022	0.0478555	0.166273
0.10275	0.0883364	0.241751	0.166273	0.15078	0.318102
0.241751	0.122214	0.295505	0.318102	0.187257	0.378424
0.295505	0.1636	0.278829	0.378424	0.232141	0.359586
0.278829	-0.00221667	0.275997	0.359586	0.0542296	0.356398
0.275997	0.0406921	0.161231	0.356398	0.099825	0.229561
0.161231	0.142214	0.250717	0.229561	0.208899	0.328086
0.250717	0.194233	0.243553	0.328086	0.265627	0.320106
0.243553	-0.0484391	0.0809434	0.320106	0.00538048	0.142849
0.0809434	0.0310733	0.156021	0.142849	0.0895812	0.223891
0.156021	0.114391	0.17012	0.223891	0.178814	0.239247
0.17012	-0.0215779	0.15155	0.239247	0.0337367	0.219033
0.15155	0.0970709	0.0773836	0.219033	0.160164	0.139033
0.0773836	0.140449	0.270498	0.139033	0.206986	0.350218
0.270498	0.178653	0.189673	0.350218	0.248565	0.260626
0.189673	0.0921327	0.152976	0.260626	0.154857	0.220581
0.152976	0.078837	0.114716	0.220581	0.140591	0.179164
0.114716	0.0516058	0.0709545	0.179164	0.111465	0.132147
0.0709545	0.108797	0.125488	0.132147	0.172784	0.190794
0.125488	0.0623348	0.0762931	0.190794	0.122926	0.137864
0.0762931	0.0528603	0.116454	0.137864	0.112804	0.181039
0.116454	0.155238	0.10223	0.181039	0.223041	0.165714
0.10223	0.130514	0.188183	0.165714	0.196228	0.258993
0.188183	0.14741	0.16829	0.258993	0.214537	0.237252
0.16829	0.188375	0.128759	0.237252	0.259204	0.19433
0.128759	0.0941048	0.156179	0.19433	0.156976	0.224063
0.156179	0.112094	0.0738838	0.224063	0.176337	0.135284
0.0738838	0.0465269	0.0659979	0.135284	0.106046	0.126843
0.0659979	0.016368	0.0663382	0.126843	0.0739464	0.127207
0.0663382	0.0197807	0.0912269	0.127207	0.0775721	0.153884
0.0912269	0.0581752	0.0175383	0.153884	0.11848	0.0751895
0.0175383	-0.131762	0.0184656	0.0751895	-0.0820941	0.0761748
0.0184656	0.00789666	0.0224455	0.0761748	0.0649533	0.0804044
0.0224455	0.0805568	0.104798	0.0804044	0.142434	0.168477
0.104798	0.0485604	0.111342	0.168477	0.108215	0.175527
0.111342	0.000644478	0.118917	0.175527	0.0572621	0.183696
0.118917	0.158185	0.113209	0.183696	0.226246	0.177539
0.113209	0.0632106	0.126235	0.177539	0.123862	0.191601
0.126235	0.0499302	0.141207	0.191601	0.109677	0.207808
0.141207	0.0885914	0.0907464	0.207808	0.151054	0.153368
0.0907464	-0.0273242	0.10134	0.153368	0.0276635	0.164755
0.10134	-0.029389	0.136124	0.164755	0.0254821	0.2023
0.136124	-0.0370034	0.0962455	0.2023	0.0174424	0.159277
0.0962455	0.0498829	-0.104816	0.159277	0.109626	-0.0538798
-0.104816	-0.0117428	0.133205	-0.0538798	0.0441407	0.19914
0.133205	-0.166339	0.0277911	0.19914	-0.118208	0.0860889
0.0277911	0.0490279	0.128115	0.0860889	0.108714	0.193633
0.128115	0.179049	0.227104	0.193633	0.248998	0.301852
0.227104	0.198155	0.196742	0.301852	0.269932	0.26838
0.196742	0.167756	0.248104	0.26838	0.236669	0.325173
0.248104	0.14634	0.1556	0.325173	0.213375	0.223434
0.1556	0.0998341	0.179546	0.223434	0.163136	0.249541
0.179546	0.0940454	0.0830853	0.249541	0.156912	0.145146
0.0830853	0.0835958	0.196075	0.145146	0.145693	0.267649
0.196075	0.0839447	0.151829	0.267649	0.146068	0.219336
0.151829	0.0970662	0.10214	0.219336	0.160159	0.165617
0.10214	0.10647	0.156653	0.165617	0.170278	0.22458
0.156653	0.104461	0.158579	0.22458	0.168115	0.226674
0.158579	0.0767993	0.149923	0.226674	0.138407	0.217264
0.149923	0.123145	0.203987	0.217264	0.188262	0.276342
0.203987	0.172235	0.174176	0.276342	0.241555	0.243674
0.174176	0.109733	0.140916	0.243674	0.173792	0.207492
0.140916	0.0266464	0.12879	0.207492	0.0848713	0.194364
0.12879	0.0599714	0.0266623	0.194364	0.120399	0.0848882
0.0266623	0.0698133	0.105526	0.0848882	0.130925	0.169261
0.105526	0.0566042	0.0741586	0.169261	0.116802	0.135578
0.0741586	0.171511	0.050724	0.135578	0.240765	0.110524
0.050724	0.0873414	0.0557948	0.110524	0.149712	0.115937
0.0557948	0.0805555	0.185921	0.115937	0.142433	0.256516
0.185921	0.0763034	0.142396	0.256516	0.137875	0.209097
0.142396	0.0757672	0.174844	0.209097	0.137301	0.244404
0.174844	0.0786326	0.0998949	0.244404	0.140371	0.163201
0.0998949	0.10766	0.13793	0.163201	0.171559	0.204257
0.13793	0.0295308	0.0726501	0.204257	0.0879398	0.133962
0.0726501	0.153341	0.070376	0.133962	0.220979	0.131528
0.070376	0.0545348	0.128998	0.131528	0.114592	0.194588
0.128998	0.0921707	0.149505	0.194588	0.154898	0.216811
0.144299	-0.0260021	0.0953902	0.211161	0.0290605	0.158357
0.0811654	0.179773	0.144299	0.143087	0.24979	0.211161
0.175129	0.0547211	0.0811654	0.244715	0.114791	0.143087
0.0968287	0.148408	0.175129	0.159904	0.21562	0.244715
0.0999098	0.151963	0.0968287	0.163217	0.219481	0.159904
0.235484	0.173596	0.0999098	0.31114	0.243041	0.163217
0.285278	0.117162	0.235484	0.366856	0.181804	0.31114
0.0994667	0.202788	0.285278	0.16274	0.275024	0.366856
0.0865382	0.0998119	0.0994667	0.14885	0.163112	0.16274
0.160087	0.165313	0.0865382	0.228315	0.234007	0.14885
0.0424409	0.0558964	0.160087	0.101689	0.116046	0.228315
0.184369	0.0554063	0.0424409	0.254817	0.115522	0.101689
0.143777	0.0461327	0.184369	0.210594	0.105625	0.254817
0.188176	0.129518	0.143777	0.258987	0.195151	0.210594
0.0505922	0.144618	0.188176	0.110383	0.211506	0.258987
0.280889	0.0313812	0.0505922	0.361906	0.089909	0.110383
0.311908	0.203651	0.280889	0.397079	0.275973	0.361906
0.308033	0.27702	0.311908	0.39266	0.357549	0.397079
0.236059	0.217106	0.308033	0.311778	0.290799	0.39266
0.073327	-0.012664	0.236059	0.134687	0.0431658	0.311778
0.18874	0.0155026	0.073327	0.259604	0.0730272	0.134687
0.105703	0.0654796	0.18874	0.169452	0.126288	0.259604
0.123667	0.151783	0.105703	0.188826	0.219286	0.169452
0.152203	-0.0251187	0.123667	0.219741	0.0299939	0.188826
0.0870268	0.18209	0.152203	0.149375	0.252324	0.219741
0.123502	0.109731	0.0870268	0.188648	0.173791	0.149375
0.0998377	0.0278776	0.123502	0.163139	0.0861809	0.188648
0.177752	0.0968327	0.0998377	0.247581	0.159908	0.163139
0.193855	0.127054	0.177752	0.265212	0.192486	0.247581
0.14971	0.0137222	0.193855	0.217034	0.0711366	0.265212
0.15554	0.166633	0.14971	0.223368	0.235445	0.217034
0.272181	0.091337	0.15554	0.352108	0.154002	0.223368
0.0970935	0.120617	0.272181	0.160188	0.185532	0.352108
0.159784	0.0783254	0.0970935	0.227985	0.140042	0.160188
0.136702	0.142651	0.159784	0.202926	0.209373	0.227985
0.229478	0.181346	0.136702	0.30448	0.25151	0.202926
0.105408	0.0664847	0.229478	0.169134	0.127364	0.30448
0.284029	0.182483	0.105408	0.365446	0.252754	0.169134
0.208499	0.157882	0.284029	0.281309	0.225916	0.365446
0.245616	0.124526	0.208499	0.322403	0.189754	0.281309
0.130018	0.0529858	0.245616	0.195692	0.112938	0.322403
0.196287	0.00027694	0.130018	0.267881	0.0568725	0.195692
0.163087	0.0867788	0.196287	0.231582	0.149109	0.267881
0.171206	0.12114	0.163087	0.240433	0.186097	0.231582
0.250673	0.0689317	0.171206	0.328037	0.129982	0.240433
0.173546	0.120869	0.250673	0.242987	0.185804	0.328037
0.159292	0.159788	0.173546	0.22745	0.22799	0.242987
0.160145	0.0262313	0.159292	0.228378	0.0844298	0.22745
0.144411	0.166242	0.160145	0.211282	0.235019	0.228378
0.136759	0.173601	0.144411	0.202988	0.243047	0.211282
0.218061	0.0936572	0.136759	0.291853	0.156495	0.202988
0.160962	0.0987718	0.218061	0.229268	0.161993	0.291853
0.182419	0.0860548	0.160962	0.252684	0.148332	0.229268
0.216952	0.203756	0.182419	0.290629	0.276089	0.252684
0.143025	0.0698176	0.216952	0.209779	0.13093	0.290629
0.0530144	0.0978104	0.143025	0.112968	0.160959	0.209779
0.19049	0.105685	0.0530144	0.261522	0.169433	0.112968
0.0695488	0.102432	0.19049	0.130642	0.165931	0.261522
0.161522	0.2152	0.0695488	0.229877	0.288695	0.130642
0.162613	0.10835	0.161522	0.231066	0.172303	0.229877
0.0761464	0.0990897	0.162613	0.137707	0.162335	0.231066
0.160219	0.0525385	0.0761464	0.228459	0.11246	0.137707
0.234768	0.188186	0.160219	0.310345	0.258997	0.228459
0.284459	0.13137	0.234768	0.365932	0.197155	0.310345
0.168442	0.176815	0.284459	0.237417	0.246557	0.365932
0.107197	0.0523819	0.168442	0.171061	0.112293	0.237417
0.1004	0.0909482	0.107197	0.163744	0.153585	0.171061
0.128474	0.050166	0.1004	0.194021	0.109928	0.163744
0.157265	-0.00596069	0.128474	0.225245	0.0502631	0.194021
0.247567	0.0392659	0.157265	0.324575	0.0983053	0.225245
0.124515	0.121729	0.247567	0.189743	0.186733	0.324575
0.10408	0.0635233	0.124515	0.167705	0.124196	0.189743
0.173164	0.119789	0.10408	0.242569	0.184638	0.167705
0.147836	0.0901969	0.173164	0.214999	0.152778	0.242569
0.202953	0.0977387	0.147836	0.275205	0.160882	0.214999
0.128776	0.135415	0.202953	0.194349	0.201532	0.275205
0.207562	0.0864206	0.128776	0.280276	0.148724	0.194349
0.0335447	-0.0112453	0.207562	0.092212	0.0446674	0.280276
0.280673	-0.0330088	0.0335447	0.361662	0.0216593	0.092212
0.0718825	0.095799	0.280673	0.13314	0.158797	0.361662
0.192765	0.219977	0.0718825	0.264017	0.29397	0.13314
0.0811654	0.0803849	0.192765	0.143087	0.14225	0.264017
0.0504786	0.171882	0.0811654	0.110262	0.24117	0.143087
0.137846	-0.0197159	0.0504786	0.204165	0.0357055	0.110262
0.07723	0.131845	0.137846	0.138868	0.197668	0.204165
0.171197	0.0965753	0.07723	0.240423	0.159631	0.138868
0.0914228	0.102125	0.171197	0.154095	0.1656	0.240423
0.143181	0.121422	0.0914228	0.209948	0.186401	0.154095
0.114286	0.00886308	0.143181	0.1787	0.0659787	0.209948
0.150263	0.00169946	0.114286	0.217634	0.0583805	0.1787
0.164526	0.0166492	0.150263	0.233149	0.0742451	0.217634
0.12155	0.139658	0.164526	0.18654	0.206128	0.233149
0.254333	-0.0298563	0.12155	0.332121	0.0249886	0.18654
0.174617	0.0548241	0.254333	0.244155	0.114901	0.332121
0.141775	0.0927595	0.174617	0.208423	0.15553	0.244155
0.0408892	0.0462515	0.141775	0.100035	0.105752	0.208423
0.0866281	0.186188	0.0408892	0.148947	0.256808	0.100035
0.112545	0.104968	0.0866281	0.176823	0.168661	0.148947
0.181562	0.116023	0.112545	0.251746	0.180574	0.176823
0.00822125	0.0733054	0.181562	0.0652977	0.134664	0.251746
0.132178	0.00409302	0.00822125	0.198029	0.0609185	0.0652977
0.227205	0.0350316	0.132178	0.301963	0.0937951	0.198029
0.259529	0.0957539	0.227205	0.337928	0.158748	0.301963
0.0613256	0.0965355	0.259529	0.121847	0.159588	0.337928
0.164865	0.0817691	0.0613256	0.233518	0.143734	0.121847
0.112933	0.0129619	0.164865	0.177241	0.0703293	0.233518
0.0846736	0.154717	0.112933	0.146849	0.222474	0.177241
0.136499	0.0776511	0.0846736	0.202706	0.13932	0.146849
0.255769	0.0858114	0.136499	0.333725	0.14807	0.202706
0.237616	0.114234	0.255769	0.313507	0.178645	0.333725
0.167993	0.0607265	0.237616	0.236928	0.121206	0.313507
0.207741	0.0695323	0.167993	0.280474	0.130625	0.236928
0.0345808	0.107986	0.207741	0.0933151	0.171911	0.280474
0.0530984	-0.0390076	0.00563627	0.113058	0.0153274	0.0625553
0.114099	-0.0171976	0.0530984	0.178498	0.0383689	0.113058
0.0576451	0.0325593	0.114099	0.117914	0.0911629	0.178498
0.101463	0.00233047	0.0576451	0.164888	0.0590495	0.117914
0.0663742	-0.0882705	0.101463	0.127245	-0.0365211	0.164888
0.024904	-0.0243092	0.0663742	0.0830183	0.0308495	0.127245
0.0668217	0.00695165	0.024904	0.127724	0.0639507	0.0830183
0.143048	0.00795767	0.0668217	0.209804	0.065018	0.127724
0.195038	-0.00512245	0.143048	0.26651	0.051151	0.209804
0.0798489	0.029835	0.195038	0.141675	0.0882635	0.26651
0.0859317	0.030287	0.0798489	0.148199	0.0887444	0.141675
0.126968	0.00926815	0.0859317	0.192393	0.0664086	0.148199
0.0595751	-0.0161878	0.126968	0.119976	0.0394371	0.192393
0.0640318	0.0199357	0.0595751	0.12474	0.0777368	0.119976
0.120749	-0.123975	0.0640318	0.185675	-0.073947	0.12474
0.0590883	0.0200649	0.120749	0.119456	0.0778741	0.185675
0.0877912	-0.0448708	0.0590883	0.150195	0.00914261	0.119456
0.125021	-0.0222311	0.0877912	0.19029	0.0330462	0.150195
0.228378	0.127698	0.125021	0.303262	0.193182	0.19029
0.140608	0.0838367	0.228378	0.207158	0.145952	0.303262
0.169284	-0.00414514	0.00336376	0.238336	0.0521863	0.0601451
0.226032	0.0830596	0.164464	0.300665	0.145118	0.233081
-0.0314811	0.0251973	0.226032	0.0232725	0.0833302	0.300665
0.0761843	0.0482204	0.0998654	0.137748	0.107852	0.163169
0.0782676	-0.0120295	0.0761843	0.13998	0.0438373	0.137748
0.0552261	-0.0353002	0.0782676	0.11533	0.0192402	0.13998
0.0300435	-0.0411487	0.0552261	0.0884853	0.0130685	0.11533
0.0826814	-0.0429044	0.0300435	0.144712	0.0112165	0.0884853
0.111507	-0.0131105	0.0826814	0.175704	0.0426933	0.144712
0.0115005	0.0487666	0.111507	0.0687779	0.108435	0.175704
0.121037	0.0189728	0.0115005	0.185986	0.0767136	0.0687779
0.11414	0.091947	0.121037	0.178544	0.154658	0.185986
0.00215309	0.0185352	0.11414	0.0588614	0.0762487	0.178544
0.0903745	-0.0344285	0.0379313	0.152969	0.0201604	0.0968835
0.0301056	0.0360685	0.0936269	0.0885514	0.0948993	0.156462
0.0842133	-0.0493061	0.0301056	0.146356	0.00446666	0.0885514
0.0310684	-0.00970102	0.0842133	0.0895761	0.0463022	0.146356
0.156336	-0.0508428	0.0310684	0.224235	0.00284708	0.0895761
0.130508	0.0621278	0.156336	0.196222	0.122704	0.224235
0.139909	0.035256	0.130508	0.206401	0.0940341	0.196222
0.135085	0.0203042	0.139909	0.201175	0.0781284	0.206401
0.0939073	0.0984069	0.135085	0.156764	0.161601	0.201175
0.0343871	0.1008	0.0939073	0.0931089	0.164175	0.156764
0.0750657	-0.0908541	0.0343871	0.136549	-0.0392334	0.0931089
0.0538595	-0.00496646	0.0750657	0.113871	0.0513162	0.136549
0.0888997	-0.13045	0.0538595	0.151385	-0.0807226	0.113871
0.0958874	-0.0213097	0.0888997	0.158892	0.0340203	0.151385
0.10304	-0.0487365	0.0958874	0.166585	0.005067	0.158892
0.193578	0.0364032	0.10304	0.264909	0.0952558	0.166585
0.117326	0.000305401	0.193578	0.18198	0.0569026	0.264909
0.0906639	-0.00477355	0.117326	0.15328	0.0515206	0.18198
0.0332883	0.0599217	0.0906639	0.091939	0.120346	0.15328
0.0910138	-0.0594907	0.0332883	0.153655	-0.00626238	0.091939
0.0573218	-0.0915889	0.120582	0.117568	-0.0400046	0.185495
0.0992311	-0.0649963	0.0573218	0.162487	-0.0120575	0.117568
0.0634446	-0.118186	0.0992311	0.124112	-0.0678874	0.162487
0.0271957	0.0338613	0.0634446	0.0854556	0.092549	0.124112
0.0212849	-0.0356318	0.0271957	0.0791707	0.0188901	0.0854556
0.0518463	-0.0134953	0.0212849	0.111721	0.042286	0.0791707
0.0526986	-0.00304103	0.0518463	0.112631	0.0533561	0.111721
0.0147753	-0.090766	0.0526986	0.0722548	-0.0391409	0.112631
0.0383295	-0.0826379	0.0147753	0.0973076	-0.0306057	0.0722548
-0.0454749	0.0180218	0.0383295	0.00850558	0.0757032	0.0973076
0.0496398	-0.00613151	-0.0454749	0.109367	0.0500821	0.00850558
0.0679567	0.0655219	0.0496398	0.128938	0.126334	0.109367
0.138997	-0.0111458	0.0679567	0.205412	0.0447727	0.128938
0.137118	0.0407453	0.138997	0.203377	0.0998817	0.205412
0.154524	0.0592121	0.137118	0.222265	0.119588	0.203377
0.115914	0.0124749	0.154524	0.180456	0.0698123	0.222265
0.00707319	-0.0138431	0.115914	0.0640796	0.0419179	0.180456
0.0654897	-0.0128695	0.00707319	0.126299	0.0429482	0.0640796
0.068638	-0.0587601	0.0654897	0.129668	-0.00549301	0.126299
0.0425421	-0.0301033	0.068638	0.101797	0.0247277	0.129668
-0.00093513	-0.0695872	0.0425421	0.0555878	-0.0168875	0.101797
0.0374806	0.00467699	-0.00093513	0.0964033	0.0615378	0.0555878
0.0891909	-0.00600657	0.109739	0.151698	0.0502145	0.173799
0.162659	-0.0309403	0.0891909	0.231116	0.0238436	0.151698
0.142138	0.00535358	0.162659	0.208817	0.0622554	0.231116
0.0793736	0.0887402	0.142138	0.141166	0.151214	0.208817
0.118612	0.0418935	0.0793736	0.183368	0.101105	0.141166
0.0911002	0.0261869	0.118612	0.153748	0.0843825	0.183368
0.0385283	0.0598922	0.0911002	0.0975194	0.120315	0.153748
0.112849	0.0269743	0.0385283	0.177152	0.0852201	0.0975194
0.0961846	-0.0173254	0.112849	0.159211	0.0382338	0.177152
0.0911443	0.0540281	0.0961846	0.153796	0.114051	0.159211
0.159332	0.0488109	0.0911443	0.227494	0.108482	0.153796
0.216515	0.114868	0.159332	0.290147	0.179328	0.227494
0.202822	0.105012	0.216515	0.275061	0.168707	0.290147
0.248539	-0.0173577	0.202822	0.325658	0.0381996	0.275061
0.183838	-0.0303496	0.248539	0.254236	0.0244675	0.325658
0.0699811	-0.0253544	0.183838	0.131105	0.0297448	0.254236
-0.0265656	-0.0555562	0.0699811	0.028465	-0.0021189	0.131105
0.00323951	-0.0423634	-0.0265656	0.0600134	0.0117871	0.028465
0.054968	-0.00352928	0.00323951	0.115054	0.0528388	0.0600134
-0.023951	-0.0605284	0.118291	0.0312281	-0.00735491	0.183022
0.118291	0.0872155	-0.0674122	0.183022	0.149577	-0.0145995
-0.0674122	-0.0157637	0.171455	-0.0145995	0.0398858	0.240704
0.171455	0.12591	0.202969	0.240704	0.19125	0.275223
0.202969	0.193383	0.211921	0.275223	0.264694	0.285079
0.211921	0.161905	0.13717	0.285079	0.230295	0.203433
0.13717	0.0488556	0.190283	0.203433	0.10853	0.261296
0.190283	0.0727801	0.172409	0.261296	0.134102	0.241745
0.172409	-0.111454	-0.0153264	0.241745	-0.0608358	0.0403485
-0.0153264	-0.0950038	0.0252848	0.0403485	-0.0435883	0.0834232
0.0252848	0.0270419	0.1341	0.0834232	0.085292	0.200109
0.1341	0.023158	0.0783226	0.200109	0.0811618	0.140039
0.133623	-0.0320651	0.139005	0.199592	0.0226558	0.205421
0.139005	0.00634986	0.187894	0.205421	0.0633122	0.258678
0.187894	0.111541	0.0444298	0.258678	0.175741	0.103809
0.0444298	-0.154077	0.117573	0.103809	-0.105412	0.182247
0.117573	-0.0246857	-0.0280812	0.182247	0.0304516	0.0268636
0.0161164	-0.0327833	0.160659	0.0736792	0.0218974	0.228938
0.122216	0.0443101	0.0161164	0.187259	0.103682	0.0736792
0.129974	0.0842513	0.122216	0.195644	0.146396	0.187259
0.0595395	-0.0574269	0.129974	0.119938	-0.00408918	0.195644
0.0934124	-0.0489696	0.0595395	0.156232	0.00482131	0.119938
0.0625986	0.0299546	0.108616	0.123208	0.0883908	0.172589
0.0224464	0.0247584	0.0712565	0.0804053	0.0828634	0.13247
0.0771242	-0.0288779	0.0965766	0.138755	0.0260221	0.159633
-0.0458706	-0.0160446	0.0771242	0.00808837	0.0395887	0.138755
0.090497	-0.0159111	-0.0458706	0.1531	0.0397299	0.00808837
0.0861388	-0.00473144	0.0734669	0.148422	0.0515652	0.134837
0.0894139	0.0454604	0.0861388	0.151937	0.104908	0.148422
0.115266	0.0493439	0.0894139	0.179758	0.109051	0.151937
0.148937	0.122997	0.115266	0.216195	0.188102	0.179758
0.150715	0.0992809	0.0921329	0.218125	0.162541	0.154857
0.135453	0.0756242	0.114741	0.201573	0.137148	0.179192
0.146917	0.0606078	0.135453	0.214002	0.12108	0.201573
0.0888389	-0.0256737	0.146917	0.15132	0.0294075	0.214002
0.130327	0.00637956	0.0888389	0.196025	0.0633438	0.15132
0.0219308	0.0640646	0.130327	0.0798572	0.124775	0.196025
0.0496785	0.034024	0.0219308	0.109408	0.0927222	0.0798572
0.278256	0.121757	0.223776	0.35894	0.186763	0.298169
0.202034	0.111335	0.278256	0.274195	0.175519	0.35894
0.278238	0.0978006	0.185942	0.35892	0.160949	0.25654
0.194245	0.0519409	0.118853	0.26564	0.111822	0.183628
0.200208	0.109979	0.194245	0.272188	0.174058	0.26564
0.103919	0.0490263	0.200208	0.167531	0.108712	0.272188
0.102634	0.0121189	0.103919	0.166148	0.0694343	0.167531
0.103649	-0.0329535	0.102634	0.16724	0.0217177	0.166148
0.153336	0.0549659	0.103649	0.220973	0.115052	0.16724
0.094239	-0.0013458	0.153336	0.15712	0.0551525	0.220973
0.0584059	0.0703932	0.094239	0.118727	0.131546	0.15712
0.0504332	0.0678893	0.0584059	0.110213	0.128866	0.118727
0.11971	0.0462599	0.183676	0.184553	0.105761	0.254059
0.118666	0.0785522	0.11971	0.183426	0.140285	0.184553
0.141522	0.0559121	0.151278	0.208149	0.116063	0.218737
0.183313	0.0336355	0.141522	0.253661	0.0923086	0.208149
0.136787	0.082909	0.183313	0.203018	0.144957	0.253661
0.085876	-0.0445389	0.136787	0.14814	0.00949262	0.203018
0.1575	-0.00228868	0.085876	0.2255	0.0541533	0.14814
0.176687	0.0164295	0.1575	0.246417	0.0740117	0.2255
0.1477	0.0941261	0.176687	0.214851	0.156999	0.246417

## Sheet: Fig 2E
Fig 2E Bootstrap data
ClpB deletion mutants						DnaK deletion mutants
New lineages			Old lineages			New lineages			Old lineages
a	σ1	a^2 + σ1^2	a	σ1	a^2 + σ1^2	a	σ1	a^2 + σ1^2	a	σ1	a^2 + σ1^2
0.138296	0.0662412	0.0235136	0.286609	0.0806525	0.0886496	0.0758074	0.111355	0.0181467	0.245274	0.239705	0.117618
0.193816	0.0659794	0.0419181	0.419475	0.0902665	0.184108	0.212065	0.135778	0.0634072	0.553947	0.236715	0.362892
0.224688	0.0686227	0.0551936	0.315483	0.0706583	0.104522	0.579255	0.301337	0.426341	0.729342	0.289483	0.61574
0.166536	0.0700145	0.0326364	0.255019	0.0724328	0.0702813	0.496886	0.233869	0.30159	0.707475	0.234368	0.555449
0.214994	0.0680378	0.0508516	0.320073	0.0707766	0.107456	0.561277	0.305135	0.408139	0.699146	0.29666	0.576812
0.202503	0.0679928	0.0456305	0.348652	0.0813438	0.128175	0.428898	0.255495	0.249231	0.489024	0.276837	0.315783
0.197774	0.0688474	0.0438545	0.241558	0.068498	0.0630425	0.462765	0.248769	0.276038	0.7628	0.27721	0.658709
0.126005	0.0650473	0.0201084	0.247302	0.071226	0.0662314	0.249411	0.131334	0.0794547	0.54861	0.279653	0.379179
0.197208	0.0683346	0.0435606	0.26438	0.0682167	0.0745503	0.354065	0.293524	0.211519	0.546032	0.298994	0.387548
0.194826	0.066701	0.0424063	0.367692	0.0905119	0.14339	0.384312	0.279381	0.225749	0.630536	0.279462	0.475674
0.143094	0.0663594	0.0248796	0.334613	0.0770654	0.117905	0.385221	0.285992	0.230186	0.448345	0.30696	0.295238
0.116311	0.0657152	0.0178468	0.442176	0.100306	0.205581	0.614155	0.290763	0.46173	0.918571	0.276051	0.919977
0.199948	0.0640062	0.044076	0.338162	0.0684891	0.119044	0.421518	0.27458	0.253072	0.706114	0.304012	0.59102
0.151534	0.0673402	0.0274974	0.307343	0.0930016	0.103109	0.63699	0.326052	0.512066	0.891263	0.27283	0.868786
0.195071	0.0673198	0.0425845	0.236648	0.0664078	0.0604124	0.602773	0.290194	0.447547	0.880771	0.307575	0.87036
0.170949	0.0701318	0.034142	0.366366	0.0909644	0.142499	0.274891	0.297719	0.164202	0.436545	0.305946	0.284175
0.166841	0.0676606	0.0324139	0.346751	0.079426	0.126545	0.306612	0.287472	0.176651	0.592178	0.284678	0.431717
0.147701	0.067618	0.0263877	0.296714	0.0784659	0.0941958	0.415487	0.285228	0.253984	0.50915	0.268597	0.331378
0.142735	0.0714933	0.0254845	0.295812	0.0691109	0.0922812	0.304711	0.170985	0.122085	0.611469	0.259926	0.441456
0.104357	0.0696369	0.0157396	0.369376	0.0983143	0.146104	0.302996	0.0978596	0.101383	0.513175	0.185567	0.297783
0.161831	0.0679899	0.0308121	0.307523	0.070399	0.0995267	0.432975	0.259882	0.255006	0.691296	0.283706	0.558379
0.149006	0.068905	0.0269508	0.303994	0.083296	0.0993508	0.166891	0.149155	0.0500996	0.639173	0.234804	0.463675
0.204806	0.0692501	0.046741	0.289449	0.0704102	0.0887381	0.572227	0.300893	0.417981	0.703292	0.297879	0.583351
0.146253	0.0668503	0.025859	0.214765	0.0688149	0.0508596	0.214194	0.130977	0.063034	0.415502	0.233347	0.227092
0.153792	0.0675265	0.0282119	0.31733	0.082995	0.107587	0.494953	0.263503	0.314412	0.599252	0.29091	0.443731
0.12411	0.0680418	0.020033	0.303193	0.0672658	0.096451	0.643691	0.317513	0.515153	0.702475	0.318376	0.594834
0.165575	0.0635078	0.0314484	0.307985	0.0809553	0.101409	0.196931	0.151192	0.0616408	0.396219	0.231485	0.210575
0.236349	0.0653515	0.0601315	0.384718	0.0806725	0.154516	0.27155	0.162316	0.100086	0.434259	0.252902	0.25254
0.199653	0.0674487	0.0444107	0.281787	0.0699412	0.0842955	0.242143	0.121204	0.0733238	0.79326	0.232901	0.683504
0.1986	0.0700199	0.0443447	0.42426	0.106095	0.191253	0.524639	0.240906	0.333282	0.797093	0.278779	0.713075
0.209997	0.0702142	0.0490286	0.317204	0.0686432	0.10533	0.142693	0.121755	0.0351855	0.35888	0.211061	0.173341
0.156214	0.0657104	0.0287206	0.318425	0.0932192	0.110084	0.224693	0.15128	0.0733727	0.548161	0.246867	0.361424
0.121732	0.0682791	0.0194807	0.216244	0.0681064	0.0513998	0.367564	0.271773	0.208964	0.498015	0.293116	0.333936
0.162188	0.0695756	0.0311459	0.249636	0.0673042	0.0668478	0.403482	0.275182	0.238523	0.61313	0.284466	0.456849
0.218241	0.0691323	0.0524083	0.294273	0.0692401	0.0913909	0.737129	0.300641	0.633744	0.849744	0.281773	0.801461
0.235414	0.0662643	0.0598108	0.490745	0.106087	0.252085	0.411346	0.254168	0.233807	0.713369	0.237701	0.565397
0.178574	0.0683797	0.0365643	0.33094	0.0926294	0.118101	0.205799	0.152135	0.0654984	0.388118	0.215189	0.196942
0.1629	0.0649194	0.0307509	0.322998	0.0809667	0.110883	0.460877	0.320307	0.315004	0.544537	0.296466	0.384413
0.174394	0.066384	0.0348201	0.355812	0.0817677	0.133288	0.540586	0.306311	0.38606	0.656631	0.297203	0.519493
0.197524	0.0680752	0.0436499	0.507591	0.10643	0.268976	0.537747	0.297273	0.377543	0.867168	0.273125	0.826577
0.142574	0.0695649	0.0251665	0.238693	0.06965	0.0618255	0.451161	0.252975	0.267543	0.80398	0.279374	0.724435
0.162059	0.0642832	0.0303955	0.314171	0.0820586	0.105437	0.350717	0.260802	0.19102	0.549563	0.287595	0.384731
0.17494	0.0657337	0.0349248	0.31841	0.0824757	0.108187	0.135014	0.0904453	0.0264092	0.349844	0.207049	0.16526
0.166974	0.0688965	0.0326271	0.319139	0.0784537	0.108005	0.477512	0.259253	0.29523	0.546574	0.276884	0.375408
0.155081	0.0672283	0.0285698	0.346888	0.0795489	0.126659	0.257222	0.114645	0.0793067	0.574215	0.232302	0.383687
0.243054	0.0665828	0.0635087	0.329495	0.0783695	0.114709	0.369159	0.267891	0.208044	0.557091	0.274354	0.38562
0.203986	0.06651	0.0460339	0.251755	0.0705884	0.0683635	0.212111	0.115652	0.0583663	0.748588	0.262995	0.629551
0.143618	0.067794	0.0252222	0.295854	0.0828117	0.0943874	0.456568	0.271536	0.282186	0.693382	0.299596	0.570537
0.14443	0.0683461	0.0255311	0.233144	0.0676934	0.0589386	0.402565	0.26094	0.230148	0.757697	0.27116	0.647633
0.156666	0.0666369	0.0289848	0.280012	0.0828789	0.0852756	0.545964	0.31656	0.398287	0.689803	0.289217	0.559474
0.182913	0.0686373	0.0381683	0.357072	0.0799221	0.133888	0.343688	0.151207	0.140985	0.973836	0.304967	1.04136
0.161391	0.0659318	0.030394	0.288135	0.0786396	0.0892057	0.348794	0.139616	0.14115	0.615844	0.260501	0.447124
0.155903	0.0672076	0.0288225	0.312653	0.0810136	0.104315	0.682908	0.268599	0.538509	0.881664	0.265427	0.847782
0.143853	0.0679711	0.0253136	0.286379	0.0686389	0.0867242	0.169604	0.135192	0.0470422	0.740805	0.258281	0.615501
0.149452	0.0661526	0.0267121	0.250325	0.0822827	0.0694331	0.207662	0.131899	0.0605208	0.388097	0.224292	0.200926
0.13398	0.0677505	0.0225407	0.215412	0.0658168	0.0507341	0.217696	0.132169	0.0648603	0.760874	0.273584	0.653777
0.166587	0.0663405	0.0321524	0.288899	0.0882543	0.0912515	0.469531	0.254374	0.285165	0.531128	0.302	0.3733
0.20441	0.0707127	0.0467838	0.348973	0.0819416	0.128497	0.183163	0.171307	0.0628949	0.220509	0.241923	0.107151
0.169095	0.0663864	0.0330004	0.344064	0.0906328	0.126594	0.244035	0.144465	0.0804231	0.45271	0.242298	0.263655
0.137431	0.0675398	0.023449	0.266913	0.0677161	0.075828	0.569298	0.301094	0.414757	0.652952	0.295465	0.513646
0.136547	0.0661624	0.0230225	0.329648	0.0798411	0.115042	0.447323	0.261871	0.268674	0.820833	0.279127	0.751678
0.150741	0.0660953	0.0270914	0.258949	0.0715017	0.0721673	0.456738	0.250668	0.271444	0.756084	0.255293	0.636838
0.199564	0.0702878	0.0447663	0.375821	0.0873754	0.148876	0.55685	0.294643	0.396896	0.78032	0.270292	0.681957
0.208962	0.06794	0.048281	0.318523	0.0716936	0.106597	0.664216	0.305502	0.534514	0.807583	0.288637	0.735501
0.182943	0.0665488	0.037897	0.303002	0.080006	0.0982113	0.224117	0.121755	0.0650526	0.665842	0.247867	0.504784
0.183475	0.0675357	0.038224	0.318143	0.0687755	0.105945	0.205004	0.12413	0.0574351	0.560314	0.229842	0.366779
0.180928	0.0707253	0.0377369	0.346432	0.0904955	0.128204	0.138873	0.0898723	0.0273629	0.315404	0.211766	0.144325
0.215212	0.0672566	0.0508398	0.375562	0.0905742	0.149251	0.105015	0.113234	0.0238501	0.376003	0.243265	0.200556
0.14491	0.0650353	0.0252284	0.254065	0.0685931	0.069254	0.420946	0.250993	0.240193	0.75961	0.274478	0.652346
0.179017	0.0698058	0.03692	0.391583	0.114682	0.16649	0.163671	0.147206	0.0484579	0.481255	0.249015	0.293615
0.170762	0.068954	0.0339142	0.28672	0.0816522	0.0888756	0.638531	0.272397	0.481922	0.707696	0.300256	0.590987
0.225458	0.0681727	0.0554787	0.349833	0.0801698	0.12881	0.0805508	0.140099	0.026116	0.119407	0.221355	0.0632561
0.0908845	0.0690401	0.0130265	0.343716	0.101513	0.128446	0.545467	0.258043	0.36412	0.846392	0.281831	0.795808
0.190587	0.0641567	0.0404394	0.355592	0.0804241	0.132914	0.402187	0.274726	0.237229	0.604762	0.297647	0.45433
0.190612	0.0688136	0.0410684	0.298002	0.0811312	0.0953875	0.43957	0.25999	0.260816	0.705293	0.284443	0.578346
0.180393	0.0700019	0.0374417	0.423503	0.0917754	0.187778	0.207681	0.14586	0.0644066	0.337295	0.250843	0.17669
0.220149	0.0687318	0.0531898	0.287495	0.0796513	0.0889975	0.503367	0.239863	0.310912	0.737655	0.266056	0.61492
0.178814	0.0667405	0.0364287	0.346305	0.0792867	0.126213	0.516077	0.319572	0.368462	0.66827	0.305143	0.539697
0.137103	0.068509	0.0234907	0.230355	0.0669378	0.0575443	0.518585	0.317883	0.369981	0.804147	0.285255	0.728023
0.212512	0.0690998	0.0499363	0.328181	0.0642023	0.111825	0.368467	0.26881	0.208026	0.586004	0.245459	0.403651
0.214973	0.0668407	0.0506813	0.31842	0.0696787	0.106246	0.214684	0.134551	0.0641933	0.554219	0.234617	0.362204
0.136629	0.06831	0.0233337	0.354953	0.0900394	0.134098	0.246027	0.137839	0.0795289	0.292793	0.222929	0.135425
0.106514	0.0672447	0.0158672	0.391769	0.0994182	0.163367	0.443071	0.255297	0.261488	0.621276	0.269885	0.458822
0.167982	0.0656419	0.0325268	0.295765	0.0843583	0.0945932	0.121491	0.115092	0.0280064	0.369607	0.247021	0.197629
0.211738	0.0706897	0.0498301	0.36158	0.0932881	0.139443	0.470417	0.265504	0.291785	0.71367	0.27677	0.585927
0.150835	0.0700703	0.0276612	0.265135	0.0813344	0.076912	0.23665	0.177484	0.0875039	0.376532	0.216456	0.188629
0.197233	0.0698318	0.0437773	0.274604	0.0682713	0.0800685	0.422211	0.253972	0.242764	0.779336	0.255966	0.672883
0.175014	0.0691324	0.0354093	0.340687	0.093615	0.124831	0.577403	0.307264	0.427805	0.702405	0.303906	0.585731
0.195333	0.068503	0.0428478	0.353268	0.0786268	0.13098	0.165499	0.116084	0.0408656	0.478595	0.247996	0.290555
0.155849	0.0664954	0.0287104	0.285416	0.0909126	0.0897277	0.394752	0.263155	0.22508	0.603356	0.259801	0.431535
0.181556	0.0647768	0.0371585	0.321418	0.0879125	0.111038	0.367118	0.267683	0.20643	0.473156	0.344747	0.342727
0.159125	0.0663505	0.029723	0.290172	0.0693402	0.0890078	0.550765	0.285718	0.384976	0.77103	0.267769	0.666187
0.132077	0.0671832	0.0219578	0.215126	0.068769	0.0510082	0.2085	0.147841	0.0653291	0.37316	0.240466	0.197072
0.165184	0.0687655	0.0320144	0.265072	0.0698627	0.0751437	0.402973	0.143722	0.183043	0.51067	0.239077	0.317941
0.101969	0.0667458	0.0148527	0.171998	0.0688185	0.0343194	0.811315	0.280136	0.736708	0.852881	0.29138	0.812308
0.135351	0.0682003	0.0229713	0.280875	0.079579	0.0852234	0.766104	0.330543	0.696175	0.639213	0.378769	0.552059
0.128078	0.0666523	0.0208464	0.31784	0.0941088	0.109879	0.251499	0.164245	0.0902282	0.329713	0.248176	0.170302
0.145591	0.0675914	0.0257653	0.385864	0.088981	0.156809	0.346286	0.147814	0.141763	0.420881	0.242397	0.235897
0.163429	0.0681193	0.0313494	0.380648	0.0919247	0.153343	0.454071	0.245318	0.266362	0.605719	0.276097	0.443125
0.212216	0.0655234	0.0493288	0.326186	0.0820859	0.113136	0.815533	0.280431	0.743736	0.865934	0.281805	0.829256
0.147904	0.0654819	0.0261634	0.29244	0.0802064	0.0919542	0.380308	0.264277	0.214477	0.626176	0.259528	0.459452
0.149079	0.0679095	0.0268361	0.260469	0.0821281	0.0745891	0.437373	0.245503	0.251566	1.02424	0.27747	1.12605
0.189474	0.0688814	0.0406451	0.376237	0.0817833	0.148242	0.404016	0.355957	0.289934	0.679991	0.30722	0.556771
0.183013	0.0696167	0.0383403	0.36506	0.0915777	0.141656	0.251263	0.138945	0.0824387	0.767312	0.226544	0.64009
0.162434	0.0699914	0.0312838	0.327438	0.0808111	0.113746	0.329328	0.298623	0.197633	0.434997	0.305817	0.282746
0.103612	0.0664727	0.0151541	0.374589	0.0916436	0.148716	0.424107	0.256306	0.245559	0.646026	0.261267	0.48561
0.186832	0.0685649	0.0396075	0.294686	0.0706762	0.0918348	0.501756	0.234823	0.306902	0.705008	0.269474	0.569652
0.188382	0.066497	0.0399095	0.39826	0.0906756	0.166833	0.403799	0.271874	0.236969	0.566005	0.281527	0.399619
0.163827	0.0707967	0.0318514	0.268079	0.0819505	0.0785824	0.264747	0.150697	0.0928006	0.749574	0.281276	0.640978
0.190107	0.0664931	0.0405621	0.409035	0.089753	0.175365	0.517314	0.29835	0.356627	0.901017	0.284508	0.892776
0.114534	0.0701173	0.0180345	0.303619	0.0929109	0.100817	0.162007	0.12572	0.0420519	0.70174	0.250581	0.55523
0.219157	0.0655054	0.0523209	0.330408	0.0810467	0.115738	0.594321	0.286408	0.435247	0.719816	0.285293	0.599527
0.121017	0.0672847	0.0191724	0.205398	0.0712807	0.0472694	0.362885	0.26	0.199286	0.597065	0.282612	0.436356
0.180735	0.0681884	0.0373149	0.335954	0.0799318	0.119254	0.275493	0.1205	0.0904167	0.483691	0.260067	0.301592
0.191413	0.0667391	0.0410931	0.296171	0.0704599	0.0926822	0.535111	0.247787	0.347742	0.792158	0.278097	0.704852
0.168291	0.0671953	0.0328372	0.276545	0.0728591	0.0817858	0.444108	0.246171	0.257832	0.532997	0.259091	0.351214
0.205075	0.0668719	0.0465277	0.352811	0.0800198	0.130879	0.351692	0.147877	0.145555	0.465465	0.244451	0.276414
0.109845	0.0674685	0.0166179	0.224441	0.0697345	0.0552368	0.421331	0.275178	0.253243	0.630408	0.253469	0.46166
0.152731	0.0684124	0.0280069	0.270866	0.0695095	0.0781998	0.388886	0.262343	0.220056	0.557678	0.274871	0.386559
0.159671	0.0702586	0.030431	0.400905	0.0885658	0.168569	0.589822	0.288229	0.430966	0.635442	0.283343	0.48407
0.11516	0.0693548	0.0180719	0.291506	0.0808768	0.091517	0.380574	0.262426	0.213704	0.754069	0.264485	0.638572
0.185663	0.0652644	0.0387302	0.282567	0.0661899	0.0842251	0.0813625	0.132659	0.0242182	0.400347	0.233898	0.214986
0.220904	0.0694922	0.0536278	0.347032	0.0704398	0.125393	0.305936	0.284772	0.174692	0.435618	0.287373	0.272346
0.165213	0.0691123	0.032072	0.4073	0.100811	0.176056	0.305059	0.117128	0.10678	0.499568	0.258726	0.316507
0.24118	0.067521	0.0627269	0.423148	0.100863	0.189228	0.463131	0.274119	0.289632	0.742508	0.285797	0.632998
0.135093	0.0678358	0.0228519	0.235434	0.0678874	0.0600378	0.384144	0.289462	0.231355	0.534703	0.266059	0.356695
0.239081	0.067396	0.0617021	0.270886	0.0825367	0.0801917	0.734522	0.288308	0.622644	0.770572	0.300655	0.684174
0.14056	0.0684932	0.0244483	0.273157	0.0679252	0.0792284	0.513889	0.324953	0.369677	0.611363	0.303351	0.465787
0.104446	0.0681417	0.0155522	0.217371	0.0668432	0.0517181	0.650099	0.313871	0.521144	0.862842	0.266116	0.815314
0.195361	0.0678612	0.042771	0.385729	0.0828397	0.155649	0.653979	0.321238	0.530883	0.845378	0.279232	0.792634
0.177682	0.0710018	0.036612	0.26607	0.0711449	0.0758548	0.0874825	0.0955468	0.0167824	0.301009	0.252667	0.154447
0.148602	0.0681758	0.0267305	0.3935	0.0912221	0.163164	0.642371	0.289147	0.496247	0.840951	0.296052	0.794845
0.199453	0.0680296	0.0444093	0.340621	0.0816502	0.122689	0.395719	0.257398	0.222847	0.696212	0.261351	0.553016
0.12695	0.0683733	0.0207912	0.529704	0.115106	0.293835	0.464741	0.25719	0.282131	0.603639	0.245266	0.424535
0.122657	0.066997	0.0195334	0.307245	0.0687012	0.0991195	0.497735	0.310402	0.34409	0.702481	0.293999	0.579915
0.206754	0.0703719	0.0476992	0.300508	0.0705369	0.0952802	0.458485	0.251066	0.273243	0.770871	0.262491	0.663144
0.18367	0.0691886	0.0385217	0.377804	0.0809548	0.14929	0.497005	0.302782	0.338691	0.691527	0.296457	0.566097
0.157023	0.0651438	0.0289	0.347235	0.0901886	0.128706	0.472876	0.271368	0.297253	0.779765	0.293421	0.694129
0.157495	0.0687788	0.0295351	0.295372	0.0816446	0.0939105	0.230537	0.119475	0.0674214	0.533062	0.215986	0.330805
0.253451	0.066996	0.068726	0.306868	0.0683538	0.0988403	0.20446	0.116789	0.0554435	0.6533	0.276131	0.503049
0.162237	0.0696596	0.0311734	0.386281	0.0921314	0.157701	0.436516	0.263384	0.259917	0.603674	0.267329	0.435887
0.193822	0.070245	0.0425014	0.372523	0.0800006	0.145173	0.0953005	0.115705	0.0224699	0.430125	0.246538	0.245789
0.153425	0.0712939	0.028622	0.413504	0.0889349	0.178895	0.225496	0.14753	0.0726135	0.514399	0.191907	0.301434
0.159995	0.0686932	0.0303171	0.345805	0.0906511	0.127799	0.0921669	0.0948288	0.0174872	0.363033	0.220932	0.180604
0.199176	0.0710669	0.0447216	0.384279	0.0894341	0.155669	0.508135	0.305175	0.351333	0.533933	0.301049	0.375714
0.215789	0.0683927	0.0512425	0.33479	0.0826638	0.118918	0.680017	0.294455	0.549126	0.750583	0.311836	0.660616
0.178847	0.0703484	0.0369351	0.259297	0.0703664	0.0721862	0.402891	0.270503	0.235493	0.43434	0.280984	0.267603
0.19585	0.0707704	0.0433659	0.3282	0.0840758	0.114784	0.174512	0.130023	0.0473604	0.182445	0.25305	0.0973204
0.151056	0.0647991	0.0270169	0.354455	0.0798794	0.132019	0.548739	0.310934	0.397795	0.720448	0.274364	0.594321
0.161646	0.066675	0.030575	0.32926	0.0837052	0.115419	0.40485	0.273144	0.238511	0.539056	0.278987	0.368416
0.140043	0.0686879	0.02433	0.317336	0.091416	0.109059	0.68481	0.331612	0.578931	0.715274	0.314096	0.610273
0.216715	0.0672692	0.0514906	0.38968	0.0823504	0.158632	0.240806	0.155907	0.0822946	0.571416	0.251711	0.389874
0.208769	0.0721581	0.0487913	0.194839	0.0685394	0.04266	0.421548	0.269315	0.250234	0.585209	0.277523	0.419489
0.198196	0.0679219	0.0438949	0.309573	0.0800418	0.102242	0.275566	0.137901	0.0949532	1.09569	0.281323	1.27968
0.161878	0.0675977	0.0307739	0.215084	0.0706454	0.0512519	0.32047	0.286466	0.184764	0.62963	0.288683	0.479772
0.182666	0.0675635	0.0379315	0.253818	0.0809117	0.0709705	0.230594	0.117568	0.0669957	0.656393	0.213049	0.476241
0.187927	0.0687194	0.0400389	0.288796	0.0707377	0.0884068	0.531765	0.24728	0.343921	0.945326	0.29137	0.978538
0.215382	0.0679822	0.0510108	0.442236	0.099856	0.205544	0.516035	0.243348	0.325511	0.884987	0.2819	0.862669
0.165244	0.0660066	0.0316624	0.259271	0.0806679	0.0737285	0.239931	0.148696	0.0796775	0.44121	0.235077	0.249928
0.231825	0.0677343	0.0583309	0.263932	0.0710203	0.0747042	0.501612	0.235128	0.3069	0.722282	0.277021	0.598432
0.214556	0.0660392	0.0503955	0.351616	0.0832124	0.130558	0.574166	0.294119	0.416173	0.850899	0.280813	0.802886
0.165902	0.0680128	0.0321492	0.286497	0.0709071	0.0871084	0.467205	0.24198	0.276835	0.733402	0.235361	0.593274
0.242437	0.0681749	0.0634234	0.262021	0.0747844	0.0742476	0.526012	0.312271	0.374202	0.678372	0.274694	0.535645
0.199102	0.0671709	0.0441535	0.264426	0.0813836	0.0765443	0.491519	0.234671	0.296662	0.602269	0.271072	0.436208
0.161057	0.0674234	0.0304852	0.313889	0.0725885	0.103795	0.398222	0.273636	0.233457	0.584943	0.264084	0.411899
0.180668	0.0680997	0.0372786	0.413804	0.0983078	0.180898	0.393925	0.250467	0.21791	0.669769	0.250235	0.511208
0.186441	0.069483	0.0395882	0.396578	0.0916243	0.165669	0.140048	0.154504	0.043485	0.385176	0.246048	0.2089
0.197061	0.0658896	0.0431743	0.416389	0.0993855	0.183258	0.182196	0.133553	0.051032	0.360623	0.218974	0.177998
0.152918	0.068328	0.0280526	0.248725	0.0682202	0.0665182	0.423224	0.276303	0.255462	0.563797	0.294375	0.404524
0.170594	0.0711623	0.0341662	0.351485	0.0934296	0.132271	0.576561	0.342934	0.450026	0.707792	0.285828	0.582668
0.158647	0.0688202	0.0299051	0.388062	0.0910102	0.158875	0.653414	0.299428	0.516608	0.722547	0.289049	0.605624
0.182408	0.067496	0.0378284	0.332182	0.0898209	0.118413	0.427245	0.271182	0.256078	0.717651	0.297063	0.603269
0.19391	0.0670778	0.0421006	0.344188	0.089135	0.126411	0.159502	0.113598	0.0383453	0.414885	0.261493	0.240508
0.20415	0.0649971	0.0459018	0.351441	0.0793334	0.129805	0.512438	0.281769	0.341986	0.880428	0.292178	0.860521
0.144735	0.0703255	0.0258939	0.407452	0.109352	0.177975	0.427148	0.272698	0.25682	0.708698	0.273465	0.577036
0.116653	0.0652968	0.0178715	0.30007	0.0807204	0.0965575	0.44258	0.340564	0.311861	0.762253	0.290732	0.665556
0.145021	0.0685039	0.0257238	0.40107	0.101342	0.171127	0.110713	0.116113	0.0257395	0.37185	0.218225	0.185894
0.243906	0.0635325	0.0635264	0.325624	0.0788964	0.112255	0.559161	0.29694	0.400835	0.604321	0.301924	0.456361
0.19965	0.06926	0.0446571	0.18586	0.0731166	0.0398899	0.602282	0.288501	0.445976	0.679466	0.319124	0.563513
0.20032	0.0670003	0.0446171	0.297954	0.0686597	0.0934905	0.26282	0.125255	0.0847631	0.712139	0.226003	0.558219
0.175931	0.0681766	0.0355998	0.350897	0.0711147	0.128186	0.563598	0.295435	0.404924	0.567133	0.30791	0.416448
0.144457	0.0663191	0.025266	0.337967	0.0812513	0.120823	0.268223	0.175244	0.102654	0.700526	0.286313	0.572712
0.134056	0.0702184	0.0229017	0.282637	0.0825842	0.0867036	0.42367	0.268144	0.251398	0.558037	0.289551	0.395245
0.155736	0.068447	0.0289388	0.304769	0.0684051	0.0975635	0.428961	0.246908	0.244971	0.519008	0.276776	0.345974
0.149209	0.0663291	0.0266629	0.269122	0.0665119	0.0768507	0.131864	0.126098	0.033289	0.696927	0.269499	0.558337
0.152932	0.0669955	0.0278766	0.324306	0.0994006	0.115055	0.318224	0.28215	0.180875	0.525689	0.268664	0.348529
0.175492	0.0683451	0.0354685	0.396552	0.0826639	0.164087	0.517696	0.310882	0.364656	0.714518	0.294903	0.597503
0.186773	0.069639	0.0397338	0.223237	0.0671344	0.054342	0.414609	0.266999	0.243189	0.582663	0.319869	0.441812
0.190368	0.0663673	0.0406446	0.273739	0.069989	0.0798317	0.353066	0.136424	0.143267	0.694921	0.236871	0.539023
0.129769	0.0689909	0.0215998	0.266234	0.0914338	0.0792404	0.368481	0.148542	0.157843	0.736504	0.277771	0.619594
0.121019	0.0653783	0.0189199	0.238303	0.0716236	0.0619184	0.139094	0.111959	0.0318818	0.477619	0.230479	0.281241
0.18127	0.0694936	0.0376882	0.308629	0.0706001	0.100236	0.467837	0.277163	0.295691	0.775871	0.297007	0.690189
0.201399	0.0678575	0.0451663	0.244218	0.0693287	0.0644487	0.199186	0.114837	0.0528625	0.52645	0.244321	0.336842
0.179106	0.0702114	0.0370086	0.282893	0.0799	0.0864123	0.367922	0.257701	0.201777	0.541067	0.269471	0.365369
0.125757	0.0656106	0.0201195	0.253679	0.0796781	0.0707015	0.56639	0.304757	0.413674	0.820029	0.295242	0.759616
0.261911	0.0683812	0.0732735	0.34413	0.0822719	0.125194	0.152415	0.150897	0.0460001	0.550722	0.238472	0.360163
0.244959	0.064919	0.0642192	0.320302	0.0771149	0.10854	0.2673	0.126755	0.0875161	0.517942	0.246994	0.32927
0.193831	0.0691622	0.0423539	0.316966	0.0780815	0.106564	0.442274	0.265234	0.265955	0.613779	0.279414	0.454797
0.242338	0.0660329	0.0630879	0.339007	0.0922641	0.123438	0.385136	0.267728	0.220008	0.677654	0.263634	0.528717
0.200802	0.0684553	0.0450075	0.307294	0.0672049	0.098946	0.353561	0.261883	0.193588	0.551437	0.266707	0.375216
0.193946	0.0687767	0.0423453	0.420841	0.0899101	0.185191	0.427948	0.265181	0.25346	0.705817	0.279664	0.57639
0.210887	0.0664004	0.0488824	0.350454	0.0817729	0.129505	0.459798	0.251078	0.274454	0.727182	0.274962	0.604397
0.225534	0.0686397	0.0555769	0.439533	0.105341	0.204286	0.234802	0.109708	0.0671679	0.388212	0.268172	0.222625
0.205405	0.069343	0.0469995	0.249514	0.0697818	0.0671266	0.450315	0.334809	0.314881	0.49103	0.327628	0.34845
0.153353	0.063168	0.0275073	0.287411	0.0803273	0.0890576	0.334383	0.281015	0.190782	0.437301	0.303498	0.283343
0.17943	0.0675414	0.0367568	0.362702	0.0899841	0.13965	0.3399	0.266997	0.18682	0.574327	0.282899	0.409884
0.068547	0.0669229	0.00917737	0.295021	0.0913711	0.095386	0.605416	0.288594	0.449816	0.89432	0.262514	0.868723
0.145737	0.0656018	0.0255428	0.287019	0.0837359	0.0893917	0.383345	0.27319	0.221586	0.460675	0.290854	0.296817
0.20171	0.067719	0.0452726	0.297743	0.0709957	0.0936913	0.348425	0.279131	0.199314	0.691782	0.274637	0.553988
0.180101	0.0634851	0.0364668	0.275708	0.0680827	0.08065	0.443026	0.253964	0.260769	0.939071	0.300783	0.972325
0.244541	0.0669315	0.0642804	0.266142	0.0679098	0.0754433	0.508772	0.313746	0.357285	0.568038	0.311981	0.419999
0.141245	0.0675414	0.0245119	0.267991	0.069885	0.0767029	0.612756	0.297729	0.464113	0.850859	0.290474	0.808336
0.212211	0.0689021	0.0497812	0.525044	0.114921	0.288878	0.263286	0.118785	0.0834292	0.732397	0.28162	0.615715
0.20708	0.0635917	0.0469259	0.256734	0.0679815	0.070534	0.534677	0.247506	0.347139	0.87409	0.282427	0.843798
0.140533	0.0655661	0.0240485	0.274589	0.0676749	0.079979	0.439536	0.25746	0.259477	0.71179	0.267624	0.578268
0.15334	0.0698166	0.0283875	0.229042	0.0726144	0.0577331	0.608806	0.280812	0.4495	0.822486	0.279065	0.754361
0.149015	0.0664063	0.0266152	0.254954	0.0693776	0.069815	0.464273	0.23676	0.271605	0.65195	0.252537	0.488813
0.199752	0.0669255	0.04438	0.320079	0.0820378	0.109181	0.148869	0.170567	0.0512551	0.34344	0.22759	0.169748
0.177688	0.0682952	0.0362371	0.418028	0.0912527	0.183075	0.384686	0.277488	0.224983	0.673948	0.283826	0.534763
0.176854	0.068101	0.035915	0.312087	0.0819168	0.104109	0.120636	0.136284	0.0331264	0.538275	0.224497	0.340139
0.161662	0.0682162	0.0307881	0.335549	0.0916869	0.121	0.223067	0.138261	0.0688751	0.616049	0.272227	0.453624
0.188003	0.0691087	0.0401211	0.351983	0.0902372	0.132035	0.625706	0.283731	0.472011	0.631944	0.28744	0.481975
0.154201	0.0672697	0.0283031	0.261605	0.0714198	0.0735381	0.191207	0.0944587	0.0454824	0.572453	0.241885	0.386211
0.234796	0.0678742	0.0597361	0.480619	0.0906667	0.239215	0.634843	0.317198	0.50364	0.784067	0.308436	0.709894
0.210938	0.0670656	0.0489926	0.40419	0.0973485	0.172846	0.253883	0.177106	0.0958232	0.400628	0.216587	0.207412
0.159851	0.0656036	0.0298562	0.246913	0.0835577	0.0679479	0.372499	0.275937	0.214897	0.513054	0.283243	0.343451
0.166863	0.0670971	0.0323452	0.236	0.0687414	0.0604213	0.250682	0.133413	0.0806403	0.443381	0.250973	0.259574
0.209504	0.070334	0.0488388	0.386639	0.0917774	0.157913	0.311752	0.14347	0.117773	0.618808	0.255348	0.448126
0.199875	0.068421	0.0446314	0.321827	0.069242	0.108367	0.45666	0.259488	0.275872	0.772576	0.264828	0.667008
0.188825	0.0692094	0.0404447	0.379735	0.0823091	0.150973	0.289409	0.138431	0.102921	0.948098	0.253689	0.963249
0.187921	0.0678635	0.0399197	0.263335	0.0713094	0.0744305	0.556724	0.298906	0.399286	0.792409	0.253756	0.692305
0.154232	0.0677976	0.0283842	0.331969	0.0926989	0.118796	0.496484	0.255919	0.311991	0.645482	0.276616	0.493164
0.156983	0.0696781	0.0294986	0.248865	0.0664036	0.0663431	0.227498	0.161056	0.0776944	0.471172	0.285711	0.303634
0.19052	0.0680907	0.0409341	0.358075	0.0829267	0.135094	0.268334	0.134399	0.0900662	0.348095	0.225121	0.17185
0.15265	0.0676192	0.0278744	0.231654	0.0679529	0.0582811	0.442381	0.255967	0.26122	0.689433	0.293009	0.561173
0.154854	0.0656066	0.0282841	0.277679	0.0935807	0.0858631	0.266692	0.144785	0.0920871	0.352707	0.206532	0.167058
0.196063	0.0656251	0.0427474	0.199053	0.0663955	0.0440305	0.166837	0.148478	0.0498804	0.614846	0.274995	0.453657
0.17923	0.0689851	0.0368824	0.324349	0.0908869	0.113463	0.5722	0.300013	0.417421	0.794654	0.27815	0.708843
0.117642	0.0643564	0.0179813	0.287407	0.069892	0.0874875	0.596371	0.285957	0.43743	0.801175	0.285633	0.723467
0.180667	0.0690648	0.0374107	0.32661	0.0813154	0.113287	0.541444	0.242751	0.35209	0.717047	0.282937	0.59421
0.158068	0.0656253	0.0292921	0.343835	0.0926046	0.126798	0.262554	0.152592	0.0922188	0.486388	0.265415	0.307018
0.188853	0.0687557	0.0403928	0.274913	0.0702801	0.0805167	0.391512	0.157748	0.178166	0.511696	0.254552	0.32663
0.202846	0.0708669	0.0461686	0.389591	0.0824331	0.158576	0.178346	0.127233	0.0479955	0.403895	0.236933	0.219268
0.156176	0.0677921	0.0289867	0.210029	0.0690631	0.048882	0.338773	0.157097	0.139447	0.643873	0.251588	0.477869
0.185922	0.0694466	0.0393899	0.333465	0.0815294	0.117846	0.524106	0.26231	0.343493	0.692568	0.294892	0.566612
0.186913	0.0681162	0.0395764	0.273948	0.0824927	0.0818526	0.592536	0.311567	0.448173	0.67424	0.314241	0.553348
0.170975	0.0666397	0.0336732	0.300986	0.0804189	0.0970598	0.13034	0.0938803	0.0258019	0.331203	0.200796	0.150015
0.137245	0.0704362	0.0237975	0.310712	0.0921341	0.105031	0.557882	0.308197	0.406218	0.675455	0.302397	0.547683
0.181864	0.0699485	0.0379674	0.303875	0.068897	0.0970865	0.582546	0.285299	0.420756	0.701445	0.307564	0.586621
0.115731	0.0708171	0.0184087	0.301855	0.0809093	0.0976626	0.328615	0.135407	0.126323	0.776295	0.250657	0.665464
0.172193	0.0645441	0.0338164	0.318101	0.0915216	0.109565	0.363565	0.263031	0.201364	0.42778	0.273412	0.25775
0.23693	0.0666985	0.0605844	0.416391	0.0813317	0.179996	0.41246	0.264347	0.240002	0.506759	0.326134	0.363168
0.154354	0.0677938	0.0284211	0.325602	0.091183	0.114331	0.446486	0.265575	0.26988	0.698033	0.247971	0.54874
0.135955	0.0691136	0.0232605	0.262515	0.0686505	0.073627	0.534411	0.315367	0.385051	0.589834	0.320688	0.450745
0.164329	0.0672539	0.031527	0.282751	0.0888532	0.0878432	0.36389	0.269376	0.204979	0.549072	0.282559	0.381319
0.171344	0.0682641	0.0340188	0.234768	0.0686031	0.0598223	0.0578009	0.123322	0.0185492	0.258877	0.184728	0.101142
0.156009	0.0669794	0.0288251	0.210962	0.0710721	0.0495564	0.355088	0.274366	0.201364	0.66658	0.29657	0.532283
0.124101	0.0666859	0.019848	0.29911	0.0805455	0.0959544	0.398269	0.268341	0.230625	0.473264	0.309467	0.319749
0.208874	0.0660459	0.0479903	0.282412	0.0833748	0.086708	0.293548	0.1522	0.109335	0.571522	0.233848	0.381322
0.177467	0.0695465	0.0363313	0.280304	0.0804963	0.0850501	0.143934	0.168129	0.0489843	0.420536	0.223383	0.22675
0.162778	0.0688561	0.0312378	0.361174	0.0815931	0.137104	0.448359	0.273839	0.276014	0.654223	0.281853	0.507449
0.193213	0.0680058	0.0419562	0.303551	0.0900203	0.100247	0.46078	0.274911	0.287894	0.522444	0.323484	0.37759
0.168724	0.0665411	0.0328956	0.370152	0.0909577	0.145286	0.399133	0.269997	0.232205	0.708713	0.286478	0.584343
0.226559	0.0680901	0.0559651	0.382763	0.0884947	0.154339	0.411655	0.284587	0.250449	0.693286	0.288308	0.563767
0.140944	0.0706335	0.0248543	0.259267	0.0669026	0.0716954	0.281678	0.300675	0.169748	0.500396	0.29505	0.337451
0.178835	0.065904	0.0363252	0.276852	0.0830623	0.0835461	0.447195	0.252804	0.263893	0.56059	0.2833	0.39452
0.26033	0.0669957	0.07226	0.401731	0.099025	0.171194	0.487069	0.3289	0.345412	0.623878	0.30739	0.483713
0.147867	0.0694346	0.0266857	0.306078	0.0927112	0.102279	0.242137	0.0919374	0.0670829	0.632046	0.189508	0.435396
0.130649	0.0664077	0.0214792	0.382674	0.0907892	0.154682	0.322483	0.145725	0.125231	0.608804	0.284388	0.451518
0.136979	0.0664909	0.0231843	0.325465	0.0922824	0.114443	0.205806	0.0861618	0.0497802	0.789181	0.244499	0.682586
0.181238	0.0691776	0.0376326	0.22558	0.0706471	0.0558772	0.603386	0.285987	0.445863	0.574126	0.323271	0.434124
0.162599	0.0642732	0.0305694	0.309926	0.0806634	0.102561	0.421726	0.247973	0.239343	0.627929	0.264042	0.464012
0.222602	0.0648292	0.0537545	0.378259	0.0810102	0.149642	0.300301	0.272777	0.164588	0.568232	0.296648	0.410888
0.152236	0.0674462	0.0277247	0.270491	0.0696861	0.0780213	0.619438	0.262553	0.452637	0.762322	0.281375	0.660306
0.18282	0.0699579	0.0383174	0.328457	0.0819094	0.114593	0.250798	0.291616	0.14794	0.496548	0.282644	0.326447
0.131278	0.0676766	0.0218141	0.405904	0.0994771	0.174653	0.280273	0.158332	0.103622	0.620846	0.227489	0.437202
0.198708	0.065953	0.0438346	0.306878	0.0836711	0.101175	0.427798	0.271485	0.256715	0.67638	0.266775	0.528659
0.193761	0.0696516	0.0423946	0.351148	0.0912143	0.131625	0.745889	0.28568	0.637964	0.835907	0.285113	0.78003
0.216314	0.064502	0.0509524	0.289698	0.0688972	0.0886717	0.386527	0.265331	0.219804	0.694935	0.245842	0.543373
0.189794	0.0693677	0.0408336	0.26752	0.0687471	0.0762933	0.241823	0.136862	0.0772097	0.686787	0.251004	0.53468
0.165736	0.0663098	0.0318653	0.400136	0.0899652	0.168202	0.333067	0.177112	0.142302	0.632093	0.292254	0.484955
0.15095	0.0670016	0.0272751	0.272501	0.0672328	0.0787769	0.358222	0.271981	0.202296	0.52137	0.304873	0.364774
0.186388	0.0665408	0.0391681	0.401602	0.102576	0.171806	0.426898	0.25987	0.249775	0.700567	0.262104	0.559493
0.129703	0.0669674	0.0213075	0.304705	0.0895856	0.100871	0.496346	0.243364	0.305586	0.841661	0.263264	0.777701
0.142998	0.0695214	0.0252815	0.36933	0.0806103	0.142902	0.560062	0.252627	0.37749	0.718425	0.278671	0.593792
0.120868	0.0689215	0.0193592	0.262167	0.0725495	0.073995	0.616246	0.289436	0.463533	0.69285	0.320917	0.583029
0.180694	0.0647797	0.0368468	0.232468	0.0687379	0.0587664	0.732312	0.286038	0.618099	0.759759	0.33076	0.686635
0.170166	0.0695125	0.0337884	0.265158	0.06768	0.0748891	0.0969499	0.112301	0.0220107	0.326546	0.20317	0.147911
0.194183	0.0667723	0.0421656	0.272805	0.0691691	0.079207	0.56504	0.353774	0.444426	0.869293	0.289217	0.839318
0.203183	0.0657025	0.0456	0.397269	0.0733714	0.163206	0.605151	0.283372	0.446507	0.773407	0.273876	0.673166
0.194182	0.0710271	0.0427516	0.376212	0.0906222	0.149748	0.452228	0.342625	0.321902	0.712555	0.299954	0.597707
0.19995	0.0664882	0.0444008	0.372672	0.0809104	0.145431	0.150686	0.137502	0.0416133	0.277133	0.235191	0.132118
0.116523	0.0709282	0.0186085	0.214238	0.0673386	0.0504323	0.371752	0.1372	0.157023	0.892094	0.250702	0.858683
0.180126	0.066843	0.0369134	0.439651	0.106627	0.204663	0.546098	0.32029	0.400809	0.869563	0.268601	0.828287
0.198295	0.0674449	0.0438697	0.325036	0.0710204	0.110693	0.424673	0.250875	0.243285	0.586497	0.257346	0.410206
0.235071	0.0659247	0.0596043	0.356	0.0821233	0.13348	0.354988	0.174662	0.156524	0.468713	0.272893	0.294163
0.124699	0.067601	0.0201198	0.313707	0.0688889	0.103158	0.229615	0.120652	0.06728	0.50716	0.217922	0.304702
0.162424	0.0670225	0.0308737	0.251418	0.0659802	0.0675646	0.586806	0.289456	0.428126	0.716963	0.281021	0.593009
0.188056	0.0685863	0.040069	0.36374	0.0811247	0.138888	0.246576	0.151135	0.0836415	0.568905	0.285662	0.405256
0.181876	0.065126	0.0373202	0.288879	0.06927	0.0882492	0.669699	0.306385	0.542369	0.926735	0.250184	0.921431
0.194977	0.0683334	0.0426856	0.234786	0.0664783	0.059544	0.237077	0.133802	0.0741087	0.447887	0.237832	0.257167
0.176579	0.0674141	0.0357249	0.390761	0.100722	0.162839	0.461686	0.327949	0.320705	0.597455	0.313243	0.455074
0.158005	0.0665139	0.0293898	0.325524	0.081115	0.112546	0.309751	0.133136	0.113671	0.342599	0.247418	0.17859
0.183361	0.0687071	0.038342	0.247257	0.0684961	0.0658279	0.0936363	0.088353	0.016574	0.220019	0.180325	0.0809254
0.222315	0.069283	0.0542242	0.344686	0.0720812	0.124004	0.196397	0.151397	0.061493	0.558561	0.242713	0.3709
0.156442	0.0682332	0.0291298	0.351296	0.0916846	0.131815	0.604265	0.287571	0.447833	0.867374	0.264656	0.822381
0.223908	0.0693862	0.0549493	0.26579	0.0655557	0.0749419	0.51222	0.322204	0.366185	0.634664	0.302212	0.494131
0.224513	0.0663332	0.054806	0.30176	0.0690279	0.0958239	0.3403	0.274649	0.191236	0.464905	0.279836	0.294445
0.207047	0.068282	0.0475309	0.374152	0.0845086	0.147132	0.531382	0.313783	0.380827	0.649495	0.292539	0.507422
0.192845	0.0682037	0.0418409	0.305349	0.0683352	0.0979077	0.202084	0.13873	0.060084	0.523964	0.255553	0.339845
0.171764	0.0676544	0.0340799	0.248788	0.0816221	0.0685578	0.326647	0.152838	0.130058	0.757657	0.248374	0.635734
0.16233	0.0700485	0.0312579	0.273649	0.0717831	0.0800364	0.330824	0.269507	0.182079	0.768066	0.296568	0.677878
0.217702	0.0711794	0.0524608	0.409447	0.0901478	0.175774	0.186462	0.123807	0.0500965	0.804532	0.267538	0.718849
0.151264	0.0666739	0.0273262	0.346177	0.0840916	0.12691	0.619066	0.316117	0.483173	0.68943	0.288334	0.55845
0.170458	0.0722501	0.0342761	0.279867	0.0678152	0.0829242	0.366801	0.152393	0.157767	0.713335	0.276979	0.585564
0.225236	0.0680534	0.0553625	0.373872	0.0835393	0.146759	0.538566	0.304906	0.383021	0.773857	0.266164	0.669698
0.198333	0.0668816	0.0438091	0.243699	0.0711958	0.0644579	0.575509	0.301701	0.422234	0.66283	0.286827	0.521613
0.20221	0.0656662	0.0452009	0.362743	0.0906355	0.139798	0.460538	0.264193	0.281893	0.536204	0.282351	0.367237
0.174863	0.0695371	0.0354123	0.309177	0.0828041	0.102447	0.452167	0.25548	0.269725	0.69935	0.264323	0.558957
0.183203	0.0660976	0.0379321	0.192994	0.0684495	0.041932	0.506401	0.255308	0.321624	0.9908	0.280996	1.06064
0.178968	0.0670836	0.0365298	0.365985	0.08003	0.14035	0.355127	0.273343	0.200831	0.77538	0.256985	0.667256
0.20355	0.0639392	0.045521	0.295086	0.0669822	0.0915623	0.554985	0.30121	0.398736	0.590559	0.329214	0.457142
0.150167	0.0663557	0.0269532	0.320353	0.0805971	0.109122	0.532374	0.309543	0.379239	0.510023	0.335749	0.37285
0.189522	0.0661461	0.0402938	0.335447	0.0934044	0.121249	0.615249	0.332209	0.488894	0.83127	0.300184	0.781121
0.225599	0.0677697	0.0554877	0.310017	0.0715519	0.10123	0.267094	0.111478	0.0837667	0.311176	0.252744	0.16071
0.202096	0.0634362	0.0448668	0.281821	0.0710334	0.0844688	0.301572	0.285899	0.172684	0.447694	0.303683	0.292654
0.131587	0.0692474	0.0221103	0.314771	0.0809625	0.105636	0.389879	0.274077	0.227124	0.587676	0.281133	0.424399
0.155657	0.0686566	0.0289428	0.250018	0.0703755	0.0674618	0.296053	0.295202	0.174792	0.343439	0.305296	0.211156
0.234717	0.0656749	0.0594055	0.463767	0.0922981	0.223599	0.514393	0.312592	0.362314	0.670103	0.317355	0.549753
0.228788	0.0689399	0.0570968	0.327357	0.0853578	0.114449	0.534961	0.243998	0.345719	0.758871	0.253437	0.640116
0.149316	0.0700956	0.0272087	0.321728	0.081296	0.110118	0.254456	0.0991831	0.0745853	0.672726	0.26109	0.520728
0.241188	0.0649719	0.0623931	0.385183	0.0921466	0.156857	0.135316	0.135054	0.0365499	0.658977	0.251455	0.497481
0.207138	0.0683793	0.0475819	0.295826	0.0825894	0.0943341	0.640552	0.324844	0.515831	1.05722	0.287012	1.20008
0.172648	0.0677868	0.0344024	0.305735	0.0710047	0.0985156	0.384506	0.265947	0.218572	0.467015	0.262667	0.287097
0.19981	0.0672053	0.0444404	0.427599	0.100494	0.19294	0.595885	0.33457	0.467016	0.705012	0.315201	0.596393
0.167102	0.0693693	0.0327352	0.239637	0.0690594	0.062195	0.202912	0.0925214	0.0497334	0.461436	0.224293	0.263231
0.179643	0.0687375	0.0369966	0.289668	0.0715168	0.0890222	0.535219	0.321599	0.389885	0.625654	0.314925	0.490621
0.188334	0.0698608	0.0403502	0.374633	0.0931074	0.149019	0.223528	0.131652	0.0672972	0.314992	0.215973	0.145864
0.0988375	0.0685903	0.0144735	0.271284	0.0805662	0.0800858	0.600029	0.29297	0.445867	0.795677	0.295256	0.720277
0.189267	0.0677264	0.0404088	0.398012	0.0921455	0.166904	0.355185	0.273645	0.201038	0.608675	0.246558	0.431277
0.144293	0.0696128	0.0256665	0.356299	0.0908044	0.135195	0.484039	0.253617	0.298615	0.697051	0.26457	0.555877
0.151777	0.0680969	0.0276734	0.3093	0.0825962	0.102489	0.571786	0.290564	0.411367	1.01933	0.282566	1.11889
0.205649	0.0684452	0.0469764	0.391084	0.0898878	0.161027	0.153843	0.113866	0.036633	0.260781	0.187822	0.103284
0.200094	0.0685687	0.0447393	0.387067	0.0824953	0.156627	0.179945	0.129849	0.0492411	0.438757	0.241483	0.250822
0.259839	0.0705927	0.0724998	0.317985	0.0682653	0.105775	0.512891	0.252698	0.326913	0.596669	0.292642	0.441653
0.164282	0.0668527	0.031458	0.346017	0.0806586	0.126233	0.382355	0.29485	0.233132	0.599202	0.299991	0.449037
0.203493	0.0693774	0.0462227	0.292756	0.0688243	0.090443	0.472667	0.245507	0.283687	0.709348	0.259592	0.570562
0.18656	0.0654666	0.0390904	0.354272	0.0777702	0.131557	0.511474	0.240482	0.319437	0.672907	0.243048	0.511877
0.147556	0.0656746	0.0260859	0.381513	0.0902796	0.153702	0.191293	0.160703	0.0624183	0.802964	0.246707	0.705616
0.196325	0.0663323	0.0429436	0.361836	0.0833396	0.137871	0.193939	0.152739	0.0609413	0.494113	0.224773	0.294671
0.16826	0.0663692	0.0327164	0.332904	0.0709312	0.115856	0.111836	0.113106	0.0253002	0.325511	0.230814	0.159233
0.0893135	0.0674113	0.0125212	0.295141	0.0819884	0.0938305	0.276537	0.139686	0.0959845	0.745312	0.274053	0.630595
0.210727	0.0667642	0.0488634	0.327835	0.0803232	0.113927	0.42482	0.25865	0.247372	0.569752	0.296563	0.412567
0.155669	0.0652696	0.028493	0.317465	0.0893676	0.108771	0.258036	0.175899	0.0975231	0.660169	0.286707	0.518024
0.195545	0.0687036	0.042958	0.429148	0.0983585	0.193843	0.333224	0.136733	0.129734	0.823666	0.298582	0.767577
0.11265	0.0681707	0.0173372	0.204279	0.066797	0.0461917	0.62588	0.272439	0.465949	0.658932	0.309732	0.530125
0.201808	0.0670349	0.04522	0.304695	0.0717252	0.0979837	0.622296	0.276368	0.463632	0.783613	0.270358	0.687143
0.152124	0.0658845	0.0274825	0.406261	0.107555	0.176616	0.380473	0.280848	0.223635	0.547192	0.292612	0.385041
0.130223	0.0664316	0.0213713	0.341618	0.10033	0.126769	0.428207	0.243496	0.242652	0.575973	0.257578	0.398091
0.181373	0.0690104	0.0376585	0.469021	0.0999145	0.229963	0.354238	0.283225	0.205701	0.739688	0.274906	0.622712
0.168413	0.0675311	0.0329232	0.431766	0.116749	0.200052	0.685847	0.300373	0.56061	0.881716	0.291471	0.862377
0.138537	0.0696587	0.0240449	0.330462	0.0811173	0.115785	0.395925	0.260474	0.224603	0.639333	0.262099	0.477443
0.22593	0.0662591	0.0554346	0.327498	0.080274	0.113699	0.488576	0.314865	0.337847	0.585209	0.314447	0.441346
0.153875	0.0667625	0.0281347	0.352312	0.0813894	0.130748	0.429863	0.345925	0.304446	0.571403	0.314496	0.425409
0.0869059	0.0685473	0.0122514	0.361138	0.0897184	0.13847	0.424751	0.261592	0.248844	0.635618	0.274937	0.4796
0.191474	0.0676599	0.0412401	0.401917	0.0902313	0.169679	0.500627	0.305426	0.343912	0.662212	0.321606	0.541956
0.24204	0.0659934	0.0629386	0.417095	0.0997616	0.183921	0.230902	0.165181	0.0806004	0.439177	0.250222	0.255487
0.21472	0.0645555	0.0502722	0.359213	0.0677489	0.133624	0.286761	0.129609	0.0990305	0.531674	0.218477	0.330409
0.230076	0.0676117	0.0575063	0.285822	0.0817923	0.0883842	0.52971	0.303848	0.372916	0.684271	0.285311	0.54963
0.194243	0.0649557	0.0419494	0.487657	0.0967455	0.247169	0.365058	0.282918	0.21331	0.526288	0.28773	0.359768
0.190865	0.0688593	0.0411712	0.304654	0.0782336	0.0989347	0.184958	0.0960916	0.0434429	0.457003	0.250032	0.271368
0.176657	0.0674399	0.0357559	0.288176	0.078626	0.0892276	0.500377	0.315468	0.349897	0.69097	0.312748	0.575251
0.157181	0.0652831	0.0289677	0.260954	0.0805732	0.0745891	0.105608	0.117306	0.0249137	0.449845	0.239691	0.259812
0.16411	0.0679101	0.0315439	0.269513	0.0712273	0.0777108	0.229157	0.174813	0.0830725	0.459849	0.245652	0.271806
0.119423	0.0658421	0.0185971	0.292963	0.0807005	0.0923397	0.497459	0.329465	0.356013	0.717013	0.293356	0.600165
0.19739	0.069501	0.0437932	0.266304	0.0699338	0.0758085	0.349196	0.262008	0.190586	0.359392	0.280917	0.208077
0.121832	0.0696515	0.0196945	0.376693	0.0904994	0.150088	0.685033	0.327576	0.576577	0.753354	0.332982	0.678419
0.184099	0.064445	0.0380456	0.410075	0.101833	0.178531	0.632217	0.321401	0.502997	0.728836	0.285866	0.612921
0.181579	0.0675701	0.0375366	0.324751	0.0667537	0.109919	0.421705	0.263714	0.24738	0.805115	0.278574	0.725814
0.131349	0.0653237	0.0215197	0.390286	0.100231	0.16237	0.447708	0.251202	0.263545	0.861783	0.279735	0.820921
0.225909	0.0670905	0.0555359	0.330409	0.0733983	0.114558	0.470588	0.244515	0.281241	0.72189	0.285496	0.602633
0.102318	0.0653228	0.0147361	0.232789	0.0672107	0.0587082	0.200879	0.163548	0.0671003	0.199124	0.230904	0.0929671
0.150194	0.0658639	0.0268963	0.270753	0.0698747	0.0781897	0.118536	0.115793	0.0274588	0.375687	0.241143	0.199291
0.183238	0.0669235	0.0380548	0.366708	0.0821911	0.14123	0.688718	0.300891	0.564868	0.906201	0.283895	0.901797
0.195407	0.0682597	0.0428434	0.262434	0.0683264	0.0735403	0.233516	0.137183	0.0733489	0.467689	0.231822	0.272475
0.173101	0.0710009	0.035005	0.297402	0.0838573	0.0954799	0.674472	0.259346	0.522173	0.968651	0.274659	1.01372
0.164214	0.0679549	0.031584	0.278834	0.0773966	0.0837384	0.367787	0.267215	0.206671	0.727672	0.261178	0.59772
0.220952	0.0690782	0.0535915	0.308314	0.0829585	0.10194	0.310478	0.1136	0.109301	0.687257	0.226377	0.523569
0.220584	0.0663845	0.0530641	0.355024	0.0835243	0.133019	0.480168	0.253667	0.294909	0.659131	0.279819	0.512752
0.190863	0.0677164	0.041014	0.446623	0.0994719	0.209367	0.147149	0.102863	0.0322336	0.46218	0.245739	0.273998
0.206605	0.0711571	0.0477489	0.268017	0.0746456	0.0774051	0.310224	0.287815	0.179077	0.384029	0.334789	0.259562
0.17156	0.0681137	0.0340724	0.334829	0.0781076	0.118211	0.349882	0.159136	0.147742	0.707577	0.27382	0.575643
0.186273	0.0663657	0.0391021	0.29346	0.0818592	0.0928196	0.224398	0.138972	0.0696677	0.530912	0.256982	0.347907
0.170496	0.0686866	0.0337866	0.419838	0.089545	0.184283	0.674433	0.265433	0.525315	0.769649	0.282451	0.672138
0.178904	0.0674747	0.0365593	0.266419	0.0830786	0.077881	0.145677	0.110642	0.0334634	0.492931	0.237851	0.299554
0.187364	0.0686725	0.0398212	0.240512	0.0696028	0.0626905	0.432001	0.262702	0.255637	0.661692	0.282765	0.517792
0.199384	0.0682421	0.0444111	0.307581	0.0670836	0.0991063	0.38134	0.267267	0.216852	0.608604	0.272595	0.444707
0.228172	0.0665336	0.0564891	0.277156	0.0691057	0.0815912	0.152175	0.149327	0.0454558	0.495361	0.264235	0.315203
0.209753	0.0672901	0.0485242	0.328566	0.0795496	0.114284	0.127861	0.12126	0.0310525	0.705699	0.231139	0.551436
0.214562	0.0705701	0.0510169	0.29834	0.0818166	0.0957005	0.110586	0.114901	0.0254315	0.313219	0.246961	0.159096
0.188177	0.0683873	0.0400873	0.280383	0.0739601	0.0840846	0.586425	0.291623	0.428938	0.71973	0.277992	0.59529
0.154107	0.0672426	0.0282706	0.24353	0.0671571	0.0638168	0.508061	0.329568	0.366741	0.612042	0.307775	0.469321
0.196468	0.0653635	0.0428719	0.26621	0.0719808	0.0760492	0.631124	0.331081	0.507932	0.757812	0.297418	0.662737
0.137584	0.0722589	0.0241508	0.306562	0.0910939	0.102278	0.270615	0.149285	0.0955183	0.982532	0.291433	1.0503
0.201341	0.0670189	0.0450299	0.230532	0.0678126	0.0577436	0.415413	0.27559	0.248518	0.816042	0.303729	0.758176
0.193426	0.0668929	0.0418883	0.290831	0.0800301	0.0909878	0.41839	0.27954	0.253193	0.62005	0.279969	0.462845
0.163406	0.0672299	0.0312214	0.203497	0.0669514	0.0458935	0.150813	0.137245	0.0415806	0.481946	0.259147	0.299429
0.191599	0.0673358	0.0412444	0.339276	0.0930151	0.12376	0.292025	0.137507	0.104187	0.614207	0.245024	0.437287
0.18803	0.0672642	0.0398797	0.318433	0.0777015	0.107437	0.465406	0.325287	0.322414	0.626777	0.303521	0.484974
0.198036	0.0696674	0.0440718	0.372886	0.0923177	0.147566	0.357878	0.289961	0.212155	0.609142	0.284106	0.45177
0.207914	0.0694433	0.0480508	0.307933	0.0716107	0.099951	0.396555	0.262546	0.226186	0.459801	0.306442	0.305324
0.206687	0.0635874	0.046763	0.277471	0.0698831	0.0818737	0.221653	0.164479	0.0761835	0.588988	0.242895	0.405905
0.131829	0.0641672	0.0214964	0.375098	0.090798	0.148943	0.238392	0.166392	0.084517	0.407304	0.227408	0.21761
0.130518	0.0686825	0.0217521	0.304469	0.0788917	0.0989253	0.451811	0.256545	0.269948	0.667178	0.282534	0.524952
0.196633	0.0664783	0.0430838	0.273775	0.0660402	0.0793143	0.47355	0.323966	0.329204	0.596471	0.312313	0.453317
0.152948	0.0673011	0.0279224	0.331205	0.0777512	0.115742	0.375157	0.259033	0.207841	0.598981	0.25184	0.422202
0.226559	0.0681843	0.055978	0.264714	0.0672991	0.0746024	0.376361	0.255331	0.206841	0.573728	0.25473	0.394052
0.177731	0.0664193	0.036	0.295956	0.0794248	0.0938984	0.566517	0.303496	0.413051	0.7974	0.302424	0.727308
0.196367	0.0686126	0.0432676	0.293615	0.08172	0.0928877	0.460432	0.25469	0.276865	0.707012	0.250862	0.562797
0.189731	0.0675487	0.0405609	0.331915	0.0803954	0.116631	0.454	0.255154	0.271219	0.692039	0.27372	0.553841
0.170258	0.0679123	0.0335997	0.337931	0.0904505	0.122378	0.580501	0.282873	0.416999	0.72423	0.289491	0.608314
0.156353	0.0671013	0.0289489	0.272659	0.0706077	0.0793284	0.343379	0.288588	0.201192	0.665797	0.278682	0.520949
0.135475	0.0662293	0.0227397	0.235787	0.068877	0.0603398	0.64855	0.317166	0.521212	0.718792	0.327123	0.623671
0.201108	0.0669228	0.044923	0.322489	0.0715619	0.10912	0.361409	0.29398	0.217041	0.508143	0.291519	0.343193
0.134247	0.066111	0.022393	0.259953	0.0793466	0.0738714	0.0962315	0.120326	0.0237389	0.550916	0.241844	0.361997
0.230276	0.0654207	0.0573068	0.325537	0.0663393	0.110375	0.498894	0.259223	0.316092	0.817282	0.280022	0.746361
0.185356	0.0693413	0.0391651	0.311012	0.068489	0.101419	0.579773	0.285215	0.417485	0.800669	0.24724	0.702198
0.163136	0.0672799	0.0311399	0.269428	0.0837261	0.0796017	0.250377	0.0959291	0.0718911	0.549216	0.2489	0.363589
0.193031	0.0627776	0.0412018	0.260721	0.0683705	0.0726498	0.204343	0.151296	0.0646464	0.483916	0.24225	0.292859
0.221442	0.0683475	0.0537077	0.334256	0.0791077	0.117985	0.500882	0.32472	0.356325	0.684689	0.288201	0.55186
0.158128	0.0690784	0.0297764	0.301922	0.081266	0.0977611	0.556668	0.29994	0.399844	0.886633	0.25719	0.852265
0.198298	0.0685932	0.0440272	0.363429	0.0790884	0.138336	0.590945	0.342576	0.466574	0.71424	0.307985	0.604993
0.181918	0.0680563	0.0377256	0.257921	0.06948	0.0713505	0.459018	0.287299	0.293238	0.717651	0.285774	0.596689
0.21007	0.0699714	0.0490253	0.2801	0.0685035	0.0831489	0.662398	0.290248	0.523014	0.877103	0.295784	0.856798
0.181479	0.0688603	0.0376763	0.369757	0.0807162	0.143235	0.483202	0.254742	0.298377	0.815571	0.301324	0.755952
0.170696	0.0675251	0.0336969	0.349741	0.0814336	0.12895	0.413923	0.26894	0.243661	0.69863	0.272063	0.562103
0.126709	0.0688258	0.0207921	0.261922	0.0706936	0.0736009	0.306192	0.284244	0.174548	0.554981	0.246745	0.368887
0.12812	0.0687086	0.0211356	0.229762	0.0705192	0.0577636	0.445283	0.257836	0.264756	0.671066	0.257675	0.516726
0.252392	0.0672088	0.0682188	0.322992	0.0802205	0.110759	0.491482	0.251471	0.304792	0.659597	0.272665	0.509415
0.129779	0.0701782	0.0217675	0.23601	0.0715761	0.060824	0.563601	0.304861	0.410587	0.746853	0.29617	0.645506
0.129471	0.0673557	0.0212995	0.256253	0.0817779	0.0723532	0.162297	0.145593	0.0475377	0.521146	0.261482	0.339966
0.199867	0.0670394	0.0444412	0.293178	0.0696447	0.0908039	0.488353	0.242253	0.297175	0.759209	0.214727	0.622507
0.155368	0.0680191	0.0287658	0.274859	0.0727006	0.0808329	0.2573	0.127544	0.0824706	0.657661	0.219018	0.480487
0.180604	0.0665923	0.0370524	0.307622	0.081358	0.10125	0.553357	0.308299	0.401252	0.803012	0.296735	0.732879
0.202802	0.0644856	0.0452871	0.350975	0.0799468	0.129575	0.469971	0.251494	0.284122	0.838562	0.274773	0.778686
0.228022	0.0673647	0.056532	0.286762	0.0674823	0.0867861	0.392603	0.259267	0.221356	0.627516	0.281409	0.472967
0.144354	0.064883	0.025048	0.391404	0.0803665	0.159656	0.417761	0.293315	0.260558	0.676507	0.28887	0.541107
0.19456	0.0673923	0.0423953	0.299201	0.0808025	0.0960503	0.405374	0.259751	0.231799	0.36987	0.280604	0.215542
0.177564	0.0677539	0.0361196	0.304502	0.0786536	0.0989081	0.260481	0.151357	0.0907594	0.317913	0.223746	0.151131
0.139527	0.0680494	0.0240986	0.271296	0.0687735	0.0783314	0.255827	0.137685	0.0844046	0.700106	0.268345	0.562157
0.146145	0.0704264	0.0263183	0.329044	0.0807499	0.114791	0.0439854	0.0955973	0.0110736	0.134175	0.142088	0.0381921
0.21521	0.0669218	0.0507937	0.461452	0.0891512	0.220886	0.432915	0.256765	0.253344	0.553739	0.291279	0.391471
0.183861	0.0693982	0.038621	0.326829	0.0795905	0.113152	0.306627	0.287016	0.176398	0.763222	0.264867	0.652662
0.215087	0.07041	0.0512199	0.23088	0.0722547	0.0585263	0.368172	0.270887	0.20893	0.593813	0.257172	0.418751
0.189724	0.0695875	0.0408375	0.358627	0.0878581	0.136333	0.138412	0.149283	0.0414434	0.640955	0.264011	0.480525
0.200728	0.0660962	0.0446605	0.30721	0.0713523	0.0994689	0.244592	0.115817	0.0732388	0.49439	0.227942	0.296379
0.199567	0.0672037	0.0443432	0.492811	0.106472	0.254199	0.415675	0.277818	0.249969	0.75298	0.294396	0.653648
0.219012	0.0652857	0.0522286	0.337102	0.0799126	0.120024	0.405481	0.257495	0.230718	0.486375	0.29304	0.322433
0.229106	0.0663234	0.0568882	0.433442	0.0908185	0.19612	0.391087	0.263775	0.222526	0.679372	0.275424	0.537404
0.215447	0.0644484	0.0505712	0.322376	0.0664801	0.108346	0.596196	0.324264	0.460597	0.63651	0.295389	0.4924
0.176094	0.0694153	0.0358278	0.216331	0.0708889	0.0518242	0.160342	0.119043	0.0398807	0.356127	0.230375	0.179899
0.18553	0.0713537	0.0395128	0.287738	0.0826836	0.08963	0.23022	0.162302	0.079343	0.432205	0.260645	0.254737
0.160833	0.0660265	0.0302268	0.259965	0.0689493	0.0723357	0.518622	0.318151	0.370189	0.773172	0.294655	0.684616
0.153483	0.0705022	0.0285277	0.421039	0.108075	0.188954	0.362693	0.136716	0.150238	0.936037	0.250373	0.938853
0.217142	0.0677415	0.0517397	0.306935	0.0705944	0.0991927	0.453799	0.255758	0.271345	0.555524	0.26277	0.377655
0.175968	0.06894	0.0357176	0.249164	0.0672656	0.0666072	0.324482	0.288439	0.188486	0.627172	0.265519	0.463845
0.145339	0.0671308	0.02563	0.213194	0.0681166	0.0500916	0.404147	0.268392	0.235369	0.438332	0.311157	0.288954
0.168009	0.0676318	0.0328012	0.377123	0.0797477	0.148581	0.182888	0.131922	0.0508515	0.352184	0.230672	0.177243
0.214672	0.0669967	0.0505726	0.272028	0.0700524	0.0789065	0.259748	0.123091	0.0826202	0.605973	0.23126	0.420685
0.224677	0.0664496	0.0548951	0.412192	0.0889004	0.177806	0.340782	0.289406	0.199888	0.589744	0.295203	0.434943
0.131703	0.0660258	0.021705	0.299952	0.0784637	0.0961277	0.139897	0.11183	0.0320772	0.383578	0.175034	0.177769
0.182358	0.0702297	0.0381866	0.339027	0.0913316	0.12328	0.378096	0.274475	0.218293	0.401789	0.297814	0.250127
0.129435	0.0663726	0.0211588	0.316724	0.0827504	0.107162	0.629861	0.290381	0.481046	0.746704	0.283526	0.637953
0.214755	0.0642466	0.0502475	0.280089	0.0827751	0.0853018	0.642591	0.367956	0.548315	0.77008	0.328322	0.700819
0.166989	0.0673323	0.032419	0.269805	0.0813689	0.0794157	0.266652	0.128083	0.0875083	0.512014	0.279955	0.340533
0.160776	0.0701384	0.0307684	0.320196	0.0810307	0.109091	0.277782	0.148525	0.0992224	0.326323	0.246741	0.167368
0.153998	0.0657929	0.028044	0.307478	0.0666843	0.0989898	0.461739	0.273575	0.288047	0.624636	0.298799	0.479451
0.208511	0.068334	0.0481465	0.279736	0.0813542	0.0848705	0.33649	0.266698	0.184353	0.459017	0.26233	0.279514
0.153318	0.0638685	0.0275855	0.300222	0.0683788	0.094809	0.390962	0.266102	0.223662	0.516545	0.293124	0.352741
0.16395	0.066935	0.0313599	0.285276	0.0802768	0.087827	0.167186	0.148985	0.0501478	0.195872	0.245972	0.0988681
0.195336	0.0684577	0.0428424	0.211942	0.0704733	0.0498858	0.654947	0.261626	0.497404	0.84081	0.297009	0.795176
0.174631	0.0675343	0.0350567	0.292058	0.0669826	0.0897844	0.208477	0.123308	0.0586674	0.547294	0.231795	0.35326
0.179426	0.067655	0.036771	0.256821	0.0682403	0.0706138	0.256466	0.131291	0.0830119	0.810148	0.263328	0.725681
0.14482	0.0657603	0.0252971	0.288843	0.0898391	0.0915015	0.222711	0.138049	0.0686578	0.452738	0.256641	0.270837
0.120751	0.0674684	0.0191327	0.340089	0.0799071	0.122046	0.61605	0.289496	0.463326	0.713155	0.287022	0.590972
0.165241	0.0693591	0.0321153	0.249321	0.0658706	0.0664998	0.48953	0.253536	0.30392	0.732088	0.254892	0.600922
0.233426	0.068019	0.0591145	0.484593	0.100598	0.24495	0.14999	0.116583	0.0360886	0.570436	0.236565	0.38136
0.145239	0.0701216	0.0260114	0.276564	0.0787346	0.0826865	0.368014	0.274402	0.210731	0.643592	0.287983	0.497145
0.200174	0.0699671	0.044965	0.331438	0.0828372	0.116713	0.564348	0.289921	0.402543	0.809357	0.250381	0.71775
0.195521	0.0651566	0.0424737	0.448561	0.0994353	0.211094	0.572883	0.285971	0.409975	0.598115	0.304092	0.450214
0.111834	0.0678103	0.0171051	0.449919	0.108304	0.214157	0.383971	0.25534	0.212632	0.518	0.259327	0.335574
0.156787	0.0683325	0.0292515	0.27957	0.0689929	0.0829196	0.483468	0.25794	0.300274	0.645603	0.271949	0.49076
0.154028	0.0661371	0.0280987	0.2997	0.0803292	0.0962726	0.326664	0.269	0.17907	0.450405	0.254589	0.267681
0.193749	0.0673251	0.0420713	0.355142	0.0910739	0.13442	0.192426	0.119946	0.0514148	0.612413	0.265674	0.445632
0.236332	0.066235	0.0602399	0.332868	0.0832391	0.11773	0.319675	0.294879	0.189146	0.542088	0.288938	0.377344
0.163975	0.0704001	0.0318439	0.413506	0.101755	0.181341	0.293426	0.300238	0.176242	0.465345	0.282566	0.296389
0.0925842	0.0672519	0.0130946	0.203473	0.070802	0.0464144	0.630371	0.324726	0.502815	0.73009	0.302603	0.6246
0.139158	0.0696638	0.0242179	0.396223	0.0901083	0.165112	0.381254	0.145793	0.16661	0.786687	0.28156	0.698152
0.163256	0.0665349	0.0310794	0.295461	0.0693555	0.0921075	0.359982	0.145535	0.150767	0.52298	0.231704	0.327194
0.183131	0.0689245	0.0382874	0.345112	0.0921106	0.127587	0.765876	0.305529	0.679914	0.833665	0.272517	0.769263
0.114433	0.0683189	0.0177624	0.255848	0.0820468	0.07219	0.261637	0.153991	0.0921674	0.815173	0.2667	0.735636
0.167867	0.0685437	0.0328775	0.301432	0.0683714	0.095536	0.478834	0.231157	0.282715	0.617291	0.253481	0.4453
0.0819831	0.0669058	0.0111976	0.34114	0.090249	0.124521	0.137515	0.112343	0.0315313	0.270595	0.204421	0.11501
0.220016	0.0672129	0.0529246	0.315608	0.067061	0.104105	0.631878	0.285034	0.480514	0.684955	0.27182	0.54305
0.138153	0.0686306	0.0237965	0.260332	0.0689169	0.0725221	0.440681	0.25183	0.257618	0.607659	0.288252	0.452339
0.204053	0.0681286	0.0462791	0.338665	0.0929343	0.123331	0.292035	0.135579	0.103666	0.883504	0.265467	0.851052
0.225478	0.0659803	0.0551935	0.298751	0.0809452	0.0958041	0.116287	0.138259	0.0326382	0.30815	0.211577	0.139721
0.134151	0.0683345	0.0226662	0.300536	0.0818047	0.0970137	0.858878	0.289814	0.821663	0.972405	0.281847	1.02501
0.228742	0.067616	0.0568949	0.366693	0.0720682	0.139658	0.187929	0.122784	0.0503932	0.615544	0.268795	0.451145
0.189434	0.0722017	0.0410982	0.340481	0.0888379	0.123819	0.188535	0.0917597	0.0439652	0.330189	0.189893	0.145084
0.192888	0.0648468	0.041411	0.285408	0.0817909	0.0881474	0.561305	0.341837	0.431915	0.730832	0.320211	0.63665
0.202764	0.0695489	0.0459501	0.285093	0.0689656	0.0860344	0.128981	0.118749	0.0307374	0.557065	0.230839	0.363608
0.176802	0.064411	0.0354076	0.250684	0.0803004	0.0692906	0.0645236	0.13391	0.0220953	0.399421	0.279066	0.237415
0.156079	0.0663033	0.0287567	0.218687	0.0712825	0.0529053	0.435421	0.254107	0.254161	0.661462	0.288614	0.520831
0.219932	0.0683455	0.0530413	0.297765	0.0714942	0.0937754	0.491776	0.230852	0.295136	0.714303	0.24743	0.57145
0.225803	0.067305	0.0555168	0.567788	0.114594	0.335515	0.355792	0.283781	0.20712	0.559536	0.291998	0.398343
0.151264	0.0652798	0.0271421	0.331114	0.0907389	0.11787	0.39682	0.258255	0.224162	0.761916	0.27485	0.656059
0.217936	0.0664873	0.0519168	0.289397	0.0655775	0.0880511	0.312114	0.152072	0.120541	0.645787	0.259148	0.484198
0.181697	0.0677074	0.0375981	0.407986	0.0992521	0.176304	0.30912	0.274237	0.170761	0.460046	0.287887	0.294521
0.188766	0.0653378	0.0399018	0.370639	0.0910586	0.145665	0.233354	0.145036	0.0754896	0.490732	0.270267	0.313862
0.189271	0.0678431	0.0404263	0.425681	0.106248	0.192493	0.543927	0.301049	0.386487	0.706787	0.296713	0.587587
0.154717	0.0692718	0.0287358	0.252852	0.0693615	0.0687454	0.270424	0.120154	0.0875661	0.592581	0.221645	0.400279
0.101906	0.0679836	0.0150066	0.258118	0.0804406	0.0730957	0.190934	0.132559	0.0540277	0.602206	0.247608	0.423962
0.172991	0.0687791	0.0346564	0.332274	0.0709095	0.115434	0.310272	0.118302	0.110264	0.46194	0.253991	0.2779
0.222552	0.0671088	0.0540331	0.224932	0.0718516	0.0557571	0.513423	0.223899	0.313734	0.749262	0.274041	0.636492
0.145046	0.0688469	0.0257783	0.246523	0.0725795	0.0660412	0.405648	0.150624	0.187238	0.523447	0.225295	0.324755
0.282367	0.0687561	0.0844585	0.289177	0.0677849	0.0882183	0.513549	0.233551	0.318279	0.617247	0.25285	0.444927
0.167949	0.0669946	0.032695	0.363956	0.0808812	0.139005	0.352101	0.27104	0.197438	0.440704	0.291665	0.279289
0.13581	0.0682518	0.0231026	0.27232	0.0671636	0.0786689	0.421292	0.262791	0.246546	0.760824	0.280678	0.657633
0.187088	0.0662992	0.0393974	0.391143	0.0881274	0.160759	0.240538	0.145468	0.0790195	0.729759	0.271177	0.606085
0.112885	0.0657693	0.0170686	0.226138	0.0675134	0.0556966	0.467651	0.281313	0.297835	0.700568	0.305356	0.584038
0.1421	0.0677136	0.0247775	0.292266	0.0821429	0.0921669	0.41108	0.274409	0.244287	0.496085	0.332403	0.356592
0.19298	0.0681455	0.0418851	0.490345	0.112665	0.253132	0.0445034	0.115508	0.0153226	0.291783	0.217107	0.132273
0.213754	0.0693054	0.0504939	0.274608	0.0697142	0.0802695	0.599463	0.275508	0.43526	0.754378	0.264244	0.638911
0.169665	0.0670289	0.0332792	0.270738	0.0701016	0.0782136	0.429502	0.265094	0.254747	0.661113	0.290075	0.521214
0.222709	0.0657645	0.0539245	0.352225	0.0810513	0.130632	0.439276	0.260777	0.260968	0.484587	0.291585	0.319846
0.1848	0.0664048	0.0385605	0.409961	0.105915	0.179286	0.602518	0.28633	0.445012	0.775403	0.285784	0.682922
0.193389	0.0686943	0.0421183	0.2976	0.0709612	0.0936014	0.51432	0.323999	0.3695	0.583022	0.32323	0.444392
0.164178	0.0639496	0.031044	0.329522	0.0795261	0.114909	0.413351	0.262142	0.239577	0.538297	0.269065	0.36216
0.172364	0.0672761	0.0342353	0.373528	0.0893377	0.147504	0.238473	0.131631	0.0741964	0.450515	0.23483	0.258109
0.189723	0.0667731	0.0404534	0.299686	0.0938589	0.098621	0.284313	0.133531	0.0986642	0.603343	0.277901	0.441252
0.152779	0.0666258	0.0277803	0.277576	0.0805118	0.0835307	0.467877	0.250958	0.281889	0.542027	0.315779	0.39351
0.114155	0.066225	0.0174171	0.253429	0.0821825	0.0709802	0.120082	0.0985721	0.0241361	0.432744	0.255998	0.252802
0.183886	0.0678651	0.0384196	0.389336	0.0830447	0.158479	0.542759	0.299163	0.384086	0.688616	0.283016	0.55429
0.189097	0.0671152	0.0402622	0.316311	0.0807029	0.106566	0.287201	0.163313	0.109156	0.622895	0.222072	0.437315
0.144002	0.0673468	0.025272	0.249282	0.0730811	0.0674821	0.309757	0.284197	0.176717	0.351364	0.298967	0.212838
0.158452	0.067785	0.0297019	0.274688	0.0702357	0.0803864	0.0434216	0.120693	0.0164523	0.426249	0.244657	0.241545
0.193737	0.0668475	0.0420026	0.465727	0.105097	0.227947	0.414551	0.256613	0.237703	0.702789	0.294671	0.580744
0.183253	0.0664499	0.0379972	0.354928	0.0796237	0.132314	0.295654	0.134333	0.105457	1.11035	0.29812	1.32176
0.188848	0.0666386	0.0401042	0.324595	0.0821792	0.112115	0.588428	0.281691	0.425597	0.677234	0.313029	0.556633
0.20099	0.0669807	0.0448833	0.34658	0.0809667	0.126673	0.324	0.115269	0.118263	0.428173	0.214224	0.229224
0.217996	0.0669768	0.0520082	0.378568	0.0830848	0.150217	0.506466	0.314246	0.355259	0.706798	0.298353	0.588578
0.116552	0.0686505	0.0182973	0.431381	0.0975975	0.195615	0.246615	0.122228	0.0757585	0.724339	0.234979	0.579883
0.151615	0.0671291	0.0274936	0.302426	0.0792023	0.0977346	0.430458	0.258909	0.252328	0.660075	0.269335	0.50824
0.19837	0.0674239	0.0438968	0.449594	0.0999343	0.212122	0.588352	0.278627	0.423792	0.775488	0.286899	0.683693
0.129307	0.0669985	0.0212091	0.257367	0.0679166	0.0708503	0.443713	0.270296	0.269941	0.474139	0.2899	0.30885
0.255924	0.0707602	0.070504	0.41439	0.0838253	0.178746	0.287781	0.286765	0.165052	0.53561	0.247326	0.348048
0.146432	0.0659224	0.0257881	0.235711	0.0693171	0.0603646	0.0703304	0.116925	0.0186179	0.320427	0.218573	0.150448
0.14653	0.0669475	0.0259529	0.456344	0.0990373	0.218058	0.274127	0.180213	0.107622	0.592102	0.240166	0.408265
0.167159	0.0656149	0.0322473	0.372259	0.0905236	0.146771	0.391742	0.270498	0.226631	0.635272	0.258641	0.470466
0.218461	0.0661393	0.0520995	0.286234	0.0787598	0.0881333	0.51105	0.311513	0.358212	0.724246	0.316741	0.624857
0.14549	0.0668333	0.0256341	0.261752	0.0652578	0.0727729	0.233009	0.13078	0.0713965	0.504029	0.248044	0.315571
0.182181	0.0686505	0.037903	0.273733	0.0836101	0.0819206	0.305441	0.280878	0.172187	0.590898	0.284075	0.429859
0.177206	0.0667486	0.0358574	0.30934	0.0785547	0.101862	0.520805	0.23829	0.328019	0.836772	0.260901	0.768257
0.128043	0.0694411	0.021217	0.323302	0.0924765	0.113076	0.409983	0.268732	0.240303	0.657926	0.299993	0.522862
0.174095	0.0673878	0.0348503	0.313306	0.079747	0.10452	0.388615	0.273102	0.225606	0.731766	0.264519	0.605451
0.205662	0.0714001	0.0473949	0.284014	0.0819694	0.087383	0.705853	0.29195	0.583464	0.808639	0.290062	0.738033
0.213227	0.0664476	0.0498811	0.361277	0.0833496	0.137468	0.20413	0.161456	0.0677369	0.336443	0.241427	0.171481
0.148378	0.0667311	0.0264691	0.346642	0.0936196	0.128925	0.356614	0.276651	0.20371	0.537561	0.273342	0.363687
0.198447	0.0690077	0.0441432	0.410274	0.0901099	0.176444	0.162688	0.112474	0.0391178	0.365115	0.261116	0.201491
0.165204	0.0707833	0.0323025	0.381175	0.0994844	0.155192	0.137838	0.122553	0.0340184	0.292525	0.21941	0.133711
0.132576	0.0656777	0.0218898	0.266844	0.0820629	0.0779401	0.585286	0.288378	0.425722	0.672477	0.285206	0.533568
0.234208	0.0666033	0.0592895	0.3687	0.0832015	0.142862	0.475194	0.327797	0.33326	0.782892	0.294575	0.699695
0.260782	0.0647972	0.0722061	0.435529	0.089387	0.197675	0.21328	0.174647	0.0759902	0.446887	0.269762	0.27248
0.181104	0.0675427	0.0373608	0.350783	0.0891362	0.130994	0.389278	0.271637	0.225324	0.537849	0.288335	0.372418
0.181204	0.0678578	0.0374395	0.227709	0.0692893	0.0566525	0.461557	0.346531	0.333118	0.595944	0.314953	0.454345
0.183783	0.0699171	0.0386647	0.227186	0.0711382	0.0566739	0.40968	0.26771	0.239507	0.411234	0.326723	0.275862
0.169916	0.0709999	0.0339125	0.340944	0.0834582	0.123208	0.262378	0.160416	0.0945755	0.594291	0.273536	0.428004
0.152432	0.0654341	0.0275171	0.312481	0.0904329	0.105822	0.364605	0.145244	0.154033	0.765435	0.254917	0.650873
0.204453	0.0711162	0.0468587	0.359445	0.0920518	0.137675	0.485766	0.24706	0.297007	0.578126	0.254169	0.398832
0.103297	0.0671365	0.0151775	0.216282	0.0704523	0.0517416	0.511684	0.320926	0.364814	0.691632	0.297598	0.56692
0.207254	0.0687891	0.0476863	0.28023	0.0720949	0.0837264	0.202786	0.0930731	0.0497846	0.58832	0.249086	0.408165
0.197884	0.0659176	0.0435031	0.402833	0.0907508	0.17051	0.22703	0.155296	0.0756594	0.713843	0.257224	0.575736
0.137349	0.0686569	0.0235786	0.318641	0.0813369	0.108148	0.166934	0.164626	0.0549687	0.30869	0.252599	0.159096
0.150339	0.0697432	0.0274659	0.31305	0.0825858	0.104821	0.188105	0.120247	0.0498426	0.548708	0.253482	0.365334
0.187192	0.0705099	0.0400124	0.325068	0.0806528	0.112174	0.271772	0.286895	0.156169	0.291438	0.287882	0.167812
0.165537	0.0687196	0.0321248	0.298098	0.0817224	0.095541	0.341675	0.116071	0.130214	0.93961	0.260488	0.950722
0.139143	0.0650217	0.0235887	0.214283	0.0678128	0.0505158	0.817142	0.306551	0.761695	0.841345	0.306485	0.801794
0.160112	0.0712173	0.0307078	0.269349	0.0721272	0.0777513	0.54395	0.295524	0.383216	0.585767	0.323558	0.447813
0.164535	0.0660166	0.0314299	0.280722	0.0798158	0.0851755	0.228052	0.140623	0.0717825	0.466883	0.236329	0.273831
0.107601	0.0652908	0.0158409	0.228432	0.0815884	0.0588377	0.368936	0.264783	0.206224	0.539824	0.268201	0.363341
0.13179	0.06912	0.0221463	0.208435	0.0669758	0.0479307	0.582269	0.28844	0.422235	0.77237	0.262683	0.665558
0.18525	0.067014	0.0388085	0.440249	0.101666	0.204155	0.302988	0.292359	0.177275	0.40914	0.291694	0.252481
0.149385	0.0677292	0.026903	0.394336	0.0999533	0.165491	0.281699	0.179334	0.111515	0.688296	0.284502	0.554692
0.211656	0.0700675	0.0497078	0.397574	0.0920177	0.166533	0.529339	0.312948	0.378136	0.595912	0.318749	0.456713
0.12368	0.0694962	0.0201264	0.245291	0.071199	0.0652369	0.304635	0.0949498	0.101818	0.706077	0.229082	0.551023
0.11515	0.06715	0.0177687	0.3473	0.0904888	0.128805	0.448392	0.337987	0.31529	0.520543	0.335275	0.383374
0.182861	0.0680785	0.038073	0.466742	0.0992435	0.227697	0.568409	0.263068	0.392293	0.753691	0.28148	0.647281
0.205111	0.070025	0.0469742	0.280645	0.0678772	0.0833687	0.25885	0.117098	0.0807152	0.904824	0.25347	0.882953
0.165547	0.0673549	0.0319425	0.232233	0.0674848	0.0584864	0.780254	0.273026	0.68334	0.72606	0.286442	0.609212
0.137073	0.0673215	0.0233213	0.364044	0.090301	0.140682	0.320032	0.187386	0.137534	0.680812	0.261014	0.531633
0.133206	0.0661419	0.0221186	0.242621	0.0695658	0.0637045	0.605019	0.271908	0.439982	0.826473	0.26781	0.75478
0.249158	0.0701789	0.0670048	0.300097	0.0710235	0.0951025	0.428366	0.255428	0.248741	0.739189	0.241295	0.604623
0.193086	0.068939	0.0420348	0.381741	0.0828884	0.152596	0.599148	0.276229	0.435281	0.656678	0.286843	0.513505
0.118925	0.06668	0.0185894	0.371903	0.0889829	0.14623	0.212595	0.135953	0.0636798	0.616604	0.260051	0.447827
0.186828	0.0643107	0.0390405	0.372778	0.0998123	0.148926	0.400551	0.269335	0.232983	0.512333	0.277	0.339213
0.160602	0.0678026	0.0303901	0.251792	0.0658547	0.0677362	0.600881	0.283916	0.441667	0.809334	0.304674	0.747848
0.205761	0.0676872	0.046919	0.326148	0.0894069	0.114366	0.300988	0.279128	0.168506	0.430345	0.308771	0.280536
0.131969	0.0676842	0.0219969	0.312334	0.082593	0.104374	0.237357	0.112092	0.0689028	0.555541	0.225934	0.359672
0.185934	0.0658795	0.0389114	0.296517	0.0688363	0.0926609	0.155415	0.114809	0.0373349	0.647791	0.24983	0.482048
0.16663	0.0663078	0.0321623	0.28195	0.069744	0.0843602	0.270979	0.150202	0.0959903	0.536949	0.263937	0.357977
0.169486	0.0694469	0.0335482	0.209827	0.0739959	0.0495027	0.440333	0.267412	0.265403	0.731458	0.27055	0.608228
0.2219	0.0682032	0.0538915	0.273203	0.0745931	0.0802042	0.497648	0.315862	0.347422	0.609485	0.305162	0.464595
0.142267	0.0680172	0.0248663	0.315116	0.0812027	0.105892	0.146864	0.146691	0.0430872	0.666948	0.271966	0.518785
0.222742	0.0667335	0.0540676	0.290113	0.0673536	0.0887023	0.476145	0.263647	0.296224	0.491004	0.278833	0.318833
0.222974	0.0628886	0.0536723	0.375228	0.0907685	0.149035	0.653269	0.327596	0.53408	0.838807	0.288661	0.786923
0.22006	0.0665366	0.0528534	0.375128	0.0918195	0.149152	0.198605	0.12305	0.0545851	0.707642	0.223601	0.550755
0.166869	0.0661174	0.0322167	0.265237	0.0679361	0.0749658	0.356138	0.272184	0.200918	0.664243	0.305512	0.534556
0.177899	0.0668426	0.0361159	0.270199	0.0809338	0.079558	0.242194	0.16585	0.086164	0.467846	0.238798	0.275904
0.152845	0.0685892	0.0280661	0.261625	0.0696793	0.0733031	0.309333	0.174586	0.126167	0.649552	0.252283	0.485565
0.153259	0.0660514	0.027851	0.277294	0.0788825	0.0831145	0.423916	0.276954	0.256408	0.5141	0.289813	0.348291
0.137959	0.0658698	0.0233716	0.337186	0.0817629	0.120379	0.754964	0.266666	0.641081	0.803109	0.266172	0.715832
0.20635	0.066671	0.0470253	0.343164	0.0781947	0.123876	0.209863	0.113161	0.0568479	0.235414	0.208989	0.0990961
0.160755	0.0691949	0.03063	0.354982	0.0901761	0.134144	0.175186	0.118138	0.0446468	0.457041	0.237895	0.26548
0.136529	0.0679553	0.023258	0.234493	0.0701091	0.0599023	0.377822	0.281884	0.222208	0.477662	0.29071	0.312673
0.195895	0.0687424	0.0431004	0.249879	0.0695975	0.0672834	0.204678	0.140921	0.0617519	0.420564	0.213817	0.222592
0.161874	0.0678988	0.0308133	0.410893	0.0908498	0.177087	0.602792	0.287748	0.446157	0.641448	0.308549	0.506658
0.197479	0.0672371	0.0435187	0.280859	0.067641	0.0834568	0.471322	0.272053	0.296157	0.546448	0.315709	0.398278
0.200293	0.0673198	0.0446491	0.282146	0.0700022	0.0845067	0.559838	0.346268	0.43332	0.660878	0.322281	0.540625
0.197762	0.0685707	0.0438116	0.285525	0.0800908	0.0879391	0.407973	0.252494	0.230195	0.57692	0.2564	0.398577
0.18753	0.0683929	0.039845	0.341879	0.0817388	0.123562	0.195274	0.136738	0.0568292	0.423558	0.233072	0.233724
0.25775	0.0691579	0.0712177	0.375005	0.0818749	0.147333	0.220552	0.147944	0.0705306	0.441538	0.225791	0.245937
0.163993	0.0689512	0.031648	0.344387	0.0916536	0.127003	0.107515	0.0938923	0.0203753	0.345779	0.216558	0.16646
0.168063	0.0710144	0.0332882	0.287518	0.0812758	0.0892722	0.370189	0.264217	0.206851	0.446571	0.266113	0.270242
0.160421	0.0692777	0.0305344	0.244086	0.0678201	0.0641773	0.311452	0.28209	0.176577	0.578888	0.286422	0.417149
0.214786	0.0638406	0.0502088	0.29466	0.0658518	0.0911609	0.175025	0.155234	0.0547315	0.509485	0.252261	0.32321
0.155253	0.0677786	0.0286976	0.244591	0.0692135	0.0646152	0.368685	0.268861	0.208215	0.531409	0.260248	0.350124
0.163818	0.0697271	0.0316981	0.369226	0.0822026	0.143085	0.725679	0.293729	0.612886	0.77703	0.258517	0.670606
0.114628	0.0665749	0.0175718	0.419186	0.10441	0.186619	0.374672	0.272562	0.214669	0.71221	0.283769	0.587769
0.170359	0.0669006	0.0334979	0.256179	0.0681079	0.0702663	0.530101	0.246432	0.341736	0.778444	0.330569	0.715251
0.132834	0.0642507	0.021773	0.292206	0.0798609	0.0917619	0.563604	0.297639	0.406239	0.796825	0.272192	0.709019
0.18977	0.0696654	0.0408658	0.306513	0.0812052	0.100544	0.508804	0.323153	0.363309	0.774473	0.279717	0.67805
0.190883	0.0664751	0.0408551	0.276868	0.0691849	0.0814424	0.249079	0.133996	0.0799951	0.773417	0.267594	0.66978
0.16794	0.0704097	0.0331612	0.352032	0.0799397	0.130317	0.356006	0.274196	0.201923	0.506582	0.281808	0.336041
0.123307	0.0663387	0.0196054	0.264294	0.0813413	0.0764678	0.479175	0.277767	0.306763	0.67045	0.269103	0.52192
0.158461	0.0678233	0.02971	0.26442	0.0667922	0.074379	0.122666	0.112575	0.02772	0.0798909	0.222539	0.0559061
0.119356	0.070201	0.0191739	0.309777	0.0806093	0.10246	0.643278	0.282863	0.493818	0.696932	0.284641	0.566735
0.158811	0.0686637	0.0299356	0.342062	0.0804202	0.123474	0.465411	0.250971	0.279594	0.616051	0.300433	0.469778
0.110863	0.0651552	0.0165358	0.205217	0.0681083	0.0467528	0.496722	0.247589	0.308033	0.787004	0.260673	0.687326
0.109522	0.0700393	0.0169007	0.242427	0.0834328	0.065732	0.509249	0.244659	0.319192	0.687439	0.271808	0.546452
0.171109	0.0674356	0.0338259	0.339419	0.0819894	0.121928	0.378838	0.267132	0.214878	0.588265	0.252921	0.410025
0.16332	0.0661883	0.0310544	0.348494	0.0905303	0.129644	0.291649	0.125502	0.10081	0.330789	0.232745	0.163592
0.236709	0.0645174	0.0601935	0.383833	0.0897027	0.155374	0.528027	0.305929	0.372405	0.668833	0.306938	0.541549
0.190121	0.0693139	0.0409505	0.333126	0.0834693	0.11794	0.480442	0.25336	0.295016	0.664407	0.288825	0.524857
0.17096	0.0657554	0.0335512	0.310938	0.0664281	0.101095	0.176477	0.114288	0.0442058	0.413163	0.210029	0.214816
0.1605	0.068351	0.0304321	0.295386	0.0820688	0.0939882	0.256148	0.134379	0.0836694	0.54706	0.256073	0.364848
0.161629	0.0668811	0.0305971	0.248255	0.0701805	0.0665559	0.630774	0.273338	0.47259	0.923517	0.279741	0.931139
0.106722	0.0689405	0.0161423	0.293517	0.0781619	0.0922616	0.455037	0.26786	0.278808	0.64017	0.291786	0.494957
0.174368	0.0686893	0.0351224	0.257074	0.0705521	0.0710647	0.56052	0.300809	0.404669	0.684507	0.318296	0.569862
0.196795	0.0694007	0.0435446	0.30756	0.0805155	0.101076	0.415964	0.264254	0.242856	0.601178	0.282025	0.440953
0.19167	0.067439	0.0412854	0.280074	0.07034	0.0833892	0.183634	0.0983686	0.0433977	0.563077	0.249702	0.379407
0.220819	0.0681291	0.0534024	0.363969	0.0793331	0.138767	0.253566	0.116474	0.0778619	0.55881	0.250825	0.375182
0.187926	0.0675735	0.0398825	0.284859	0.0810506	0.0877141	0.440383	0.246141	0.254523	0.849568	0.256481	0.787548
0.121902	0.0673537	0.0193965	0.317604	0.0903777	0.10904	0.657423	0.273867	0.507208	0.657923	0.307142	0.527199
0.22573	0.0697665	0.0558214	0.397951	0.0909525	0.166638	0.65665	0.308601	0.526423	0.719146	0.26912	0.589596
0.187102	0.0683212	0.039675	0.346107	0.0887394	0.127665	0.252594	0.13537	0.0821288	0.515605	0.22751	0.31761
0.180476	0.06812	0.0372118	0.270636	0.0679569	0.077862	0.484254	0.251037	0.297522	1.14661	0.281493	1.39396
0.13504	0.06455	0.0224026	0.259171	0.0659469	0.0715185	0.316735	0.111126	0.11267	0.344584	0.174393	0.149151
0.188946	0.0724087	0.0409434	0.335162	0.0849487	0.11955	0.338811	0.293987	0.201221	0.51655	0.289215	0.350469
0.222654	0.0682398	0.0542316	0.347683	0.0829181	0.127759	0.11545	0.11299	0.0260953	0.410284	0.1951	0.206397
0.164786	0.0678556	0.0317589	0.341422	0.0806174	0.123068	0.415465	0.274741	0.248094	0.746342	0.278565	0.634626
0.18613	0.0690509	0.0394125	0.353184	0.0900433	0.132847	0.753631	0.309419	0.6637	0.875026	0.306021	0.859319
0.146348	0.0664259	0.0258301	0.258955	0.0697925	0.0719285	0.445112	0.271942	0.272077	0.621348	0.283653	0.466533
0.120642	0.0651361	0.0187973	0.376113	0.0914504	0.149824	0.451796	0.338986	0.319032	0.629444	0.291214	0.481006
0.1608	0.0681152	0.0304962	0.376568	0.100654	0.151935	0.707736	0.28735	0.583461	0.913521	0.279696	0.91275
0.170585	0.0659446	0.0334478	0.306943	0.0693152	0.0990188	0.117332	0.115713	0.0271561	0.384088	0.242412	0.206287
0.225761	0.0678409	0.0555706	0.364749	0.0827784	0.139894	0.514571	0.243681	0.324164	0.819352	0.278578	0.748944
0.178885	0.0667256	0.0364521	0.371316	0.0806306	0.144377	0.24478	0.130626	0.0769804	0.467588	0.259487	0.285972
0.242639	0.0663287	0.0632734	0.277375	0.0738248	0.0823872	0.576857	0.298506	0.42187	0.826411	0.270331	0.756034
0.184022	0.0659683	0.0382159	0.518111	0.107669	0.280032	0.383113	0.264642	0.216811	0.492139	0.280646	0.320963
0.142635	0.0672401	0.0248661	0.324628	0.0791333	0.111645	0.670272	0.264587	0.519271	0.857212	0.271845	0.808712
0.225892	0.0656007	0.0553309	0.377596	0.0898296	0.150648	0.735121	0.31734	0.641108	0.848213	0.302683	0.811082
0.152185	0.0689798	0.0279186	0.320122	0.0803162	0.108929	0.424718	0.261475	0.248754	0.749663	0.284016	0.642659
0.169947	0.0695288	0.0337162	0.355871	0.0914491	0.135007	0.316638	0.137442	0.11915	0.735035	0.258779	0.607243
0.183237	0.0688118	0.0383108	0.331438	0.0829352	0.116729	0.500398	0.256506	0.316194	0.806011	0.283399	0.729969
0.170591	0.06496	0.0333212	0.347937	0.0805218	0.127544	0.606969	0.295694	0.455847	0.646574	0.295274	0.505245
0.180807	0.0656549	0.0370016	0.409858	0.0893276	0.175963	0.247983	0.116268	0.0750138	0.483732	0.28346	0.314346
0.170916	0.0724678	0.0344638	0.311365	0.0714624	0.102055	0.264148	0.120487	0.084291	0.874585	0.218737	0.812745
0.162725	0.0687021	0.0311995	0.36859	0.099876	0.145834	0.195196	0.15289	0.0614771	0.579989	0.240016	0.393995
0.159497	0.0708801	0.0304633	0.270889	0.069167	0.0781652	0.262562	0.114893	0.0821393	0.509086	0.247238	0.320295
0.187161	0.0677602	0.0396208	0.372556	0.0998007	0.148758	0.118683	0.0967326	0.0234429	0.446324	0.238853	0.256256
0.129996	0.0649614	0.0211189	0.304633	0.0914225	0.101159	0.307063	0.118528	0.108336	0.784758	0.257674	0.682241
0.237573	0.0674892	0.0609957	0.363346	0.0807154	0.138535	0.329636	0.117795	0.122535	0.798022	0.271888	0.710763
0.158295	0.0647216	0.0292462	0.292219	0.0814026	0.0920183	0.349991	0.172939	0.152402	0.355003	0.2346	0.181064
0.131441	0.0690969	0.022051	0.286205	0.0702118	0.0868429	0.615018	0.274917	0.453826	0.819892	0.260636	0.740154
0.176038	0.0675503	0.0355524	0.36	0.0908433	0.137852	0.173856	0.115241	0.0435063	0.458861	0.250299	0.273203
0.190117	0.0698554	0.0410241	0.362335	0.081611	0.137947	0.506225	0.297509	0.344776	0.554348	0.321123	0.410422
0.130526	0.066725	0.0214893	0.341979	0.0901241	0.125072	0.31103	0.135585	0.115123	0.835368	0.255	0.762865
0.211983	0.0665445	0.0493649	0.361087	0.0798085	0.136753	0.556281	0.308784	0.404796	0.689447	0.286792	0.557588
0.127718	0.0670785	0.0208113	0.253681	0.068381	0.0690302	0.474253	0.330759	0.334317	0.715773	0.291812	0.597485
0.222158	0.0669884	0.0538417	0.323894	0.0674784	0.10946	0.357591	0.270954	0.201288	0.523638	0.280156	0.352684
0.194472	0.0668933	0.0422941	0.480327	0.0988224	0.24048	0.525109	0.306554	0.369715	0.641523	0.297004	0.499764
0.221119	0.0656785	0.0532073	0.377056	0.0925608	0.150739	0.301408	0.283229	0.171066	0.562377	0.269182	0.388726
0.246046	0.0684217	0.0652202	0.441358	0.101319	0.205063	0.0854459	0.113825	0.0202572	0.720732	0.264923	0.589638
0.215758	0.0687487	0.051278	0.217919	0.0702378	0.0524219	0.458789	0.245281	0.27065	0.510873	0.297052	0.349232
0.144223	0.0682313	0.0254557	0.213055	0.0695323	0.0502273	0.147098	0.0979	0.0312222	0.446381	0.202053	0.240082
0.191361	0.0679186	0.041232	0.431491	0.101292	0.196445	0.244446	0.150666	0.082454	0.745644	0.24586	0.616432
0.172729	0.0715814	0.0349592	0.319251	0.0832963	0.10886	0.647619	0.274232	0.494614	0.943137	0.284912	0.970682
0.223328	0.0662325	0.054262	0.324137	0.079059	0.111315	0.332205	0.27974	0.188615	0.367432	0.303773	0.227284
0.165352	0.0681231	0.0319819	0.333885	0.0910783	0.119774	0.441448	0.257133	0.260994	0.398529	0.308342	0.2539
0.137842	0.0681242	0.0236413	0.267864	0.0696537	0.0766029	0.556205	0.293396	0.395445	0.644866	0.292706	0.501528
0.173964	0.0661111	0.034634	0.348713	0.0890518	0.129531	0.450255	0.237533	0.259152	0.687159	0.269053	0.544578
0.210718	0.0685514	0.0491013	0.253086	0.0847042	0.0712273	0.528038	0.305496	0.372152	0.716392	0.308733	0.608533
0.172086	0.0666065	0.0340501	0.275315	0.0704159	0.0807568	0.384674	0.260226	0.215691	0.571776	0.284681	0.407971
0.153462	0.0700993	0.0284647	0.306531	0.0716637	0.0990969	0.538488	0.249855	0.352397	0.600729	0.271337	0.4345
0.215739	0.0662476	0.0509321	0.293265	0.0659697	0.0903564	0.497141	0.313582	0.345483	0.620649	0.307018	0.479465
0.226598	0.0697394	0.05621	0.24515	0.0679116	0.0647104	0.772224	0.314291	0.695108	0.708759	0.350569	0.625238
0.186991	0.0684217	0.039647	0.408604	0.0814171	0.173586	0.445066	0.273461	0.272864	0.615762	0.312029	0.476525
0.16541	0.0687612	0.0320886	0.271333	0.0698386	0.078499	0.406788	0.285114	0.246767	0.605872	0.291553	0.452084
0.212141	0.066056	0.0493672	0.418396	0.0790172	0.181299	0.283026	0.149925	0.102581	0.364669	0.232562	0.187069
0.161847	0.0677314	0.0307819	0.315578	0.0724716	0.104841	0.229957	0.0978526	0.0624555	0.387946	0.218087	0.198064
0.16862	0.068667	0.0331479	0.322246	0.080816	0.110374	0.537972	0.30458	0.382183	0.691773	0.291667	0.56362
0.195073	0.0663159	0.0424513	0.403164	0.0925654	0.171109	0.178686	0.121708	0.0467416	0.531539	0.235008	0.337762
0.256839	0.0661685	0.0703448	0.388129	0.109154	0.162559	0.441758	0.269155	0.267595	0.540604	0.280603	0.370991
0.158427	0.0653562	0.0293706	0.326424	0.0801023	0.112969	0.26212	0.109274	0.0806478	0.398665	0.190515	0.19523
0.193412	0.0695567	0.0422463	0.325001	0.0838714	0.11266	0.475022	0.321042	0.328714	0.911916	0.253269	0.895735
0.184794	0.0675339	0.0387096	0.319227	0.0704134	0.106864	0.717631	0.252404	0.578702	0.902295	0.268094	0.886011
0.238732	0.0675256	0.0615528	0.380654	0.0908114	0.153144	0.632079	0.330836	0.508977	0.648632	0.334556	0.532651
0.17529	0.0690623	0.0354962	0.299229	0.0841243	0.0966148	0.163037	0.116548	0.0401644	0.596613	0.229495	0.408615
0.191738	0.0651338	0.0410059	0.305891	0.0716908	0.0987089	0.504224	0.253763	0.318637	0.827936	0.280448	0.76413
0.173786	0.0699067	0.0350884	0.273226	0.0674598	0.0792034	0.56045	0.318468	0.415526	0.742181	0.318679	0.65239
0.103213	0.0698346	0.0155298	0.25527	0.0685614	0.0698634	0.0932744	0.138455	0.0278699	0.523806	0.215342	0.320745
0.267125	0.0673731	0.0758952	0.417591	0.0928599	0.183005	0.111616	0.134678	0.0305963	0.312271	0.195701	0.135812
0.166228	0.0680412	0.0322613	0.229294	0.0812759	0.0591817	0.310261	0.133878	0.114186	0.487731	0.258307	0.304604
0.174268	0.0671822	0.0348828	0.368899	0.0841015	0.143159	0.559084	0.313087	0.410599	0.710745	0.293442	0.591266
0.196452	0.0697944	0.0434647	0.40042	0.101393	0.170616	0.276848	0.114757	0.089814	0.620733	0.232595	0.43941
0.134039	0.068025	0.0225938	0.251592	0.0827962	0.0701536	0.55252	0.293133	0.391205	0.722228	0.292955	0.607435
0.200612	0.0677374	0.0448336	0.335051	0.0703046	0.117202	0.849313	0.295128	0.808432	0.99488	0.254994	1.05481
0.220538	0.0647154	0.0528249	0.357452	0.0804357	0.134242	0.345112	0.151017	0.141909	0.761431	0.283729	0.66028
0.171909	0.0671571	0.0340626	0.408323	0.0892749	0.174697	0.607369	0.272139	0.442956	0.552326	0.299077	0.394511
0.189082	0.066603	0.040188	0.296981	0.0830594	0.0950967	0.145407	0.0942893	0.0300336	0.301873	0.205066	0.13318
0.10019	0.0669308	0.0145178	0.239693	0.0681534	0.0620975	0.225702	0.112887	0.063685	0.505075	0.193213	0.292432
0.238525	0.0679564	0.061512	0.34397	0.0793537	0.124612	0.330152	0.284897	0.190167	0.523691	0.271345	0.34788
0.112568	0.0704809	0.0176391	0.32718	0.0832519	0.113977	0.11755	0.135218	0.0321018	0.419049	0.233316	0.230038
0.133747	0.0662541	0.0222779	0.254787	0.0675291	0.0694768	0.248104	0.129634	0.0783607	0.392709	0.242838	0.213191
0.189895	0.0679878	0.0406824	0.360829	0.100041	0.140205	0.451347	0.278139	0.281076	0.574345	0.266181	0.400724
0.184842	0.0685109	0.0388603	0.285337	0.0820055	0.0881418	0.250354	0.0974823	0.0721797	0.604497	0.262952	0.43456
0.11135	0.0622297	0.0162713	0.427627	0.113405	0.195725	0.394452	0.268604	0.227741	0.754521	0.265693	0.639895
0.196088	0.0686838	0.0431678	0.421957	0.0989092	0.187831	0.0926621	0.104692	0.0195466	0.317684	0.241808	0.159394
0.254833	0.0669898	0.0694274	0.362648	0.0821618	0.138264	0.212349	0.136796	0.0638053	0.245437	0.202168	0.101111
0.17041	0.068233	0.0336955	0.265201	0.0696124	0.0751775	0.432625	0.247554	0.248447	0.532281	0.273929	0.35836
0.199439	0.0673014	0.0443053	0.297656	0.0804888	0.0950776	0.253346	0.128685	0.0807442	0.289344	0.171549	0.113149
0.180719	0.0707231	0.0376612	0.251201	0.0684521	0.0677874	0.395789	0.284988	0.237867	0.631043	0.268849	0.470495
0.18459	0.0645734	0.0382432	0.264239	0.0692116	0.0746128	0.464976	0.278689	0.29387	0.848153	0.268007	0.791191
0.166973	0.0642728	0.032011	0.327083	0.0803927	0.113446	0.00431257	0.131327	0.0172653	0.375192	0.215172	0.187068
0.193335	0.0691191	0.0421559	0.396945	0.0915485	0.165946	0.596657	0.290316	0.440283	0.788028	0.261491	0.689366
0.22394	0.0688497	0.0548892	0.432966	0.0995647	0.197373	0.209656	0.138795	0.0632196	0.424282	0.256404	0.245758
0.141683	0.0668999	0.0245496	0.316969	0.08272	0.107312	0.567445	0.249825	0.384406	0.601363	0.332106	0.471931
0.182881	0.0698042	0.0383181	0.267342	0.0722398	0.0766901	0.47712	0.275799	0.303708	0.707966	0.288764	0.5846
0.194131	0.0685596	0.0423872	0.351229	0.0772853	0.129335	0.449483	0.264587	0.272041	0.699807	0.283794	0.570269
0.167312	0.0686958	0.0327124	0.358998	0.0826967	0.135718	0.367169	0.275086	0.210485	0.515586	0.275829	0.34191
0.161382	0.065856	0.0303813	0.20717	0.0699922	0.0478185	0.270638	0.121749	0.0880678	0.852917	0.272264	0.801596
0.0728072	0.0692241	0.0100929	0.232077	0.0686918	0.0585783	0.305012	0.282312	0.172732	0.216476	0.32553	0.152831
0.206958	0.0685894	0.0475361	0.354675	0.0818355	0.132492	0.695492	0.323864	0.588597	0.915991	0.273746	0.913976
0.191441	0.07283	0.041954	0.296936	0.0795494	0.0944989	0.404188	0.265388	0.233798	0.62969	0.283072	0.47664
0.147248	0.0682983	0.0263466	0.387999	0.0881712	0.158317	0.472725	0.327375	0.330643	0.586184	0.312332	0.441163
0.263245	0.0644983	0.0734579	0.529711	0.115854	0.294016	0.160716	0.116837	0.0394806	0.353011	0.211227	0.169233
0.203838	0.0694793	0.0463774	0.356667	0.0908037	0.135456	0.567256	0.224974	0.372393	0.808712	0.267593	0.72562
0.214392	0.0677523	0.0505543	0.319508	0.0719204	0.107258	0.549294	0.260372	0.369518	0.742718	0.265158	0.621939
0.183445	0.0690935	0.0384259	0.42614	0.101592	0.191916	0.51858	0.276002	0.345103	0.689139	0.279913	0.553264
0.119884	0.0681946	0.0190228	0.349637	0.0659136	0.126591	0.157252	0.111717	0.0372089	0.367887	0.212626	0.180551
0.17988	0.0693504	0.0371661	0.311384	0.0710361	0.102006	0.300413	0.283246	0.170476	0.38382	0.303553	0.239463
0.22425	0.06854	0.0549857	0.263999	0.0689459	0.0744488	0.124918	0.150105	0.0381362	0.48192	0.25167	0.295585
0.20513	0.0674122	0.0466228	0.266663	0.0710729	0.0761606	0.283366	0.159485	0.105731	0.707324	0.296424	0.588174
0.138962	0.0658867	0.0236516	0.346237	0.0813338	0.126495	0.420669	0.266462	0.247964	0.549735	0.271396	0.375864
0.215306	0.068032	0.0509849	0.301201	0.0819975	0.0974458	0.769265	0.266495	0.662788	0.753449	0.287213	0.650177
0.175348	0.0689463	0.0355005	0.273919	0.0700209	0.0799346	0.547602	0.296915	0.388026	0.580165	0.306303	0.430412
0.241021	0.0686964	0.0628105	0.279676	0.0826717	0.0850531	0.661428	0.300471	0.52777	0.700087	0.300577	0.580468
0.176237	0.069986	0.0359575	0.305626	0.0782194	0.0995258	0.51874	0.323612	0.373816	0.644186	0.311403	0.511948
0.181686	0.0702045	0.0379384	0.339029	0.0812424	0.121541	0.156204	0.147958	0.0462913	0.342887	0.271003	0.191014
0.121116	0.0672988	0.0191982	0.30749	0.0684486	0.0992353	0.39539	0.274528	0.231699	0.648089	0.282269	0.499695
0.1663	0.0692864	0.0324564	0.261733	0.081659	0.0751725	0.468129	0.26837	0.291168	0.658534	0.288533	0.516918
0.213793	0.0688232	0.050444	0.358549	0.0820954	0.135297	0.538869	0.295458	0.377676	0.612558	0.301323	0.466023
0.182009	0.067602	0.0376974	0.33548	0.0894442	0.120547	0.341141	0.287107	0.198808	0.510719	0.283361	0.341128
0.192313	0.069257	0.0417808	0.320065	0.0815182	0.109087	0.179882	0.130439	0.049372	0.522236	0.241517	0.331061
0.116886	0.0720909	0.0188593	0.243445	0.0719301	0.0644396	0.399078	0.251069	0.222299	0.422206	0.292532	0.263833
0.227468	0.0684076	0.0564212	0.412524	0.0903415	0.178337	0.561643	0.302725	0.407086	0.723806	0.302798	0.615581
0.263532	0.0691077	0.074225	0.411756	0.0920237	0.178012	0.206636	0.118068	0.0566385	0.460647	0.221641	0.26132
0.179102	0.0701291	0.0369955	0.269321	0.0717812	0.0776865	0.588436	0.293459	0.432375	0.683112	0.306776	0.560754
0.125204	0.0684642	0.0203633	0.253459	0.084729	0.0714207	0.363941	0.278962	0.210273	0.453743	0.302572	0.297433
0.179878	0.0674898	0.0369111	0.317082	0.0829964	0.107429	0.380341	0.261375	0.212976	0.566302	0.273979	0.395763
0.241751	0.0683981	0.0631217	0.366932	0.0741419	0.140136	0.11291	0.14545	0.0339042	0.228178	0.225224	0.102791
0.124436	0.0675425	0.0200463	0.275287	0.0661483	0.0801585	0.595025	0.296026	0.441686	0.777467	0.289754	0.688412
0.159493	0.0672045	0.0299543	0.409564	0.0908439	0.175996	0.354026	0.273194	0.199969	0.410197	0.283035	0.24837
0.139329	0.068491	0.0241037	0.30262	0.0791411	0.097842	0.342996	0.273116	0.192239	0.509414	0.311968	0.356826
0.199544	0.0669304	0.0442976	0.301389	0.082264	0.0976027	0.435515	0.25216	0.253257	0.872946	0.282379	0.841773
0.176757	0.0678241	0.0358431	0.328177	0.080123	0.11412	0.486968	0.247932	0.298608	0.8148	0.264028	0.73361
0.194629	0.0681335	0.0425227	0.392228	0.090522	0.162037	0.56912	0.300392	0.414133	0.681097	0.31041	0.560248
0.140618	0.0692352	0.024567	0.419513	0.108666	0.187799	0.330167	0.269685	0.18174	0.455835	0.276023	0.283974
0.1741	0.070734	0.0353139	0.359401	0.0801842	0.135598	0.614614	0.270055	0.45068	0.815673	0.296153	0.753029
0.211944	0.0668367	0.0493874	0.30466	0.0783476	0.0989558	0.118318	0.0972624	0.0234592	0.369796	0.223952	0.186904
0.18844	0.0681314	0.0401513	0.324777	0.0794088	0.111786	0.598127	0.300138	0.447839	0.746727	0.285557	0.639144
0.176524	0.0684317	0.0358438	0.271934	0.0711234	0.0790068	0.484597	0.256953	0.300859	0.583057	0.272889	0.414423
0.204566	0.0658641	0.0461855	0.249808	0.0707827	0.0674143	0.296842	0.0976566	0.0976518	0.662979	0.265857	0.510222
0.12187	0.0658322	0.0191861	0.194216	0.0696022	0.0425642	0.429996	0.273447	0.25967	0.638194	0.286323	0.489273
0.155381	0.0642538	0.0282718	0.331755	0.0820486	0.116793	0.488222	0.26552	0.308862	0.448342	0.285599	0.282577
0.16091	0.0649444	0.0301099	0.266089	0.0684576	0.0754897	0.269061	0.288544	0.155652	0.591274	0.280364	0.428209
0.171988	0.0665192	0.0340048	0.313917	0.0805087	0.105025	0.130589	0.0956514	0.0262028	0.292359	0.213475	0.131045
0.178686	0.0694332	0.0367496	0.339469	0.0804483	0.121711	0.421442	0.349192	0.299548	0.581672	0.324546	0.443673
0.202322	0.0649643	0.0451544	0.297419	0.0689239	0.0932085	0.397568	0.26208	0.226746	0.78902	0.257648	0.688936
0.209808	0.0678265	0.04862	0.276472	0.0685359	0.0811342	0.224418	0.137155	0.0691747	0.571725	0.27305	0.401426
0.224784	0.0636844	0.0545835	0.315421	0.0802157	0.105925	0.242251	0.124557	0.0742	0.423316	0.253446	0.243431
0.162887	0.0685875	0.0312365	0.446683	0.0999664	0.209519	0.501453	0.312989	0.349418	0.583734	0.328047	0.44836
0.12828	0.0680594	0.0210878	0.287004	0.065984	0.0867254	0.62203	0.294301	0.473534	0.610015	0.313418	0.470349
0.135872	0.0693552	0.0232714	0.231435	0.0672594	0.0580862	0.387709	0.251611	0.213626	0.855247	0.233913	0.786162
0.179092	0.0673793	0.036614	0.352203	0.0933726	0.132765	0.445524	0.253714	0.262862	0.585185	0.268506	0.414536
0.181697	0.0713283	0.0381015	0.332958	0.0930296	0.119516	0.358295	0.271317	0.201988	0.716368	0.274565	0.588569
0.211617	0.0668719	0.0492537	0.369837	0.0886906	0.144645	0.409481	0.260032	0.235291	0.420691	0.275784	0.253038
0.211794	0.0661184	0.0492282	0.339494	0.0827064	0.122097	0.0841433	0.116562	0.0206668	0.447409	0.242992	0.25922
0.225065	0.0680068	0.055279	0.290311	0.0834824	0.0912498	0.152214	0.116023	0.0366306	0.36846	0.190316	0.171983
0.145942	0.0663891	0.0257065	0.294119	0.0668838	0.0909791	0.30383	0.137274	0.111157	0.740693	0.265459	0.619094
0.128542	0.0654682	0.0208091	0.322923	0.0781288	0.110383	0.419579	0.264252	0.245876	0.831263	0.300986	0.781591
0.189773	0.0654782	0.0403011	0.354926	0.0903697	0.134139	0.0205485	0.118912	0.0145624	0.225143	0.231991	0.104509
0.172267	0.0683049	0.0343416	0.299454	0.0700156	0.0945749	0.563423	0.297825	0.406145	0.715022	0.30616	0.60499
0.151997	0.0672622	0.0276274	0.27397	0.0678766	0.079667	0.344176	0.276185	0.194735	0.525166	0.296011	0.363422
0.201098	0.0679948	0.0450638	0.341947	0.0799902	0.123327	0.454536	0.279028	0.284459	0.589803	0.272558	0.422156
0.168411	0.0679613	0.0329811	0.256219	0.0691724	0.0704328	0.20179	0.114408	0.0538083	0.23358	0.17101	0.0838043
0.11683	0.0666675	0.0180938	0.299456	0.0899421	0.0977635	0.407218	0.34636	0.285791	0.478284	0.342731	0.346221
0.150615	0.0666104	0.0271219	0.345542	0.089342	0.127381	0.420226	0.257357	0.242822	0.684603	0.270086	0.541628
0.161767	0.0695142	0.0310007	0.300915	0.0928068	0.0991632	0.326922	0.129443	0.123634	0.649859	0.259811	0.489819
0.118178	0.0657732	0.018292	0.290149	0.0820591	0.0909199	0.350112	0.161837	0.14877	0.617642	0.243911	0.440973
0.124867	0.067842	0.0201944	0.337399	0.0822833	0.120609	0.465562	0.258398	0.283517	0.746348	0.255499	0.622314
0.184633	0.0690615	0.0388589	0.21939	0.0694206	0.0529514	0.184726	0.135412	0.0524599	0.355846	0.242217	0.185295
0.158556	0.0666104	0.0295768	0.270587	0.0692175	0.0780082	0.425273	0.260505	0.24872	0.728983	0.273336	0.606129
0.123985	0.0677743	0.0199657	0.206204	0.0703164	0.0474646	0.201275	0.123647	0.0558	0.568476	0.244592	0.38299
0.146395	0.067835	0.026033	0.292628	0.0688917	0.0903771	0.346014	0.284743	0.200804	0.386909	0.304746	0.242568
0.16265	0.0663791	0.0308613	0.318098	0.0745869	0.10675	0.437948	0.269944	0.264668	0.656195	0.286033	0.512407
0.222875	0.0647908	0.0538711	0.325543	0.0792305	0.112256	0.677588	0.308563	0.554336	0.939322	0.263727	0.951878
0.164548	0.0703451	0.0320246	0.320392	0.0815484	0.109301	0.524841	0.303713	0.3677	0.740723	0.294103	0.635167
0.123211	0.0695291	0.0200153	0.376864	0.0918751	0.150468	0.573284	0.301355	0.419469	0.688634	0.299958	0.564192
0.156378	0.0650613	0.0286871	0.266054	0.0790539	0.0770341	0.503913	0.26495	0.324127	0.816491	0.262788	0.735716
0.117261	0.0649175	0.0179645	0.339872	0.10068	0.12565	0.366431	0.262096	0.202966	0.820818	0.26647	0.744748
0.178546	0.0695396	0.0367146	0.324277	0.0889708	0.113071	0.534701	0.320792	0.388813	0.67611	0.30686	0.551287
0.155087	0.0650202	0.0282796	0.331921	0.0914227	0.11853	0.41096	0.264277	0.238731	0.811137	0.279187	0.735889
0.162212	0.0681262	0.030954	0.318278	0.0820838	0.108039	0.406564	0.266398	0.236262	0.568637	0.296549	0.41129
0.180058	0.0663643	0.0368253	0.417174	0.0903932	0.182205	0.326729	0.286944	0.189089	0.452657	0.286011	0.286701
0.15003	0.067147	0.0270178	0.375025	0.0915166	0.149019	0.182766	0.137146	0.0522126	0.325495	0.207501	0.149003
0.157509	0.0667442	0.0292638	0.376053	0.100938	0.151604	0.405877	0.254551	0.229532	0.544382	0.292412	0.381857
0.107717	0.0679074	0.0162143	0.24931	0.06635	0.0665576	0.433546	0.250488	0.250706	0.560057	0.279944	0.392032
0.128609	0.0683993	0.0212187	0.265753	0.0911321	0.0789296	0.748121	0.316146	0.659633	0.731567	0.314734	0.634248
0.159278	0.0696288	0.0302175	0.313836	0.0724422	0.103741	0.307393	0.158223	0.119525	0.85992	0.277467	0.816451
0.227537	0.0675948	0.0563424	0.293732	0.071432	0.0913808	0.504686	0.251007	0.317712	0.910596	0.26566	0.89976
0.20662	0.0674736	0.0472445	0.329145	0.0828458	0.1152	0.394024	0.253005	0.219266	0.474447	0.247149	0.286182
0.1466	0.0702573	0.0264277	0.317576	0.0928244	0.109471	0.0416621	0.0980617	0.0113518	0.373464	0.216645	0.18641
0.25894	0.068477	0.0717388	0.289635	0.0692747	0.0886876	0.594729	0.286853	0.435987	0.771438	0.282461	0.674901
0.19721	0.0702183	0.0438225	0.357654	0.0829468	0.134797	0.20528	0.128214	0.0585789	0.476629	0.209957	0.271257
0.167988	0.070246	0.0331546	0.352827	0.0925235	0.133048	0.57775	0.292393	0.419288	0.801383	0.268139	0.714113
0.176463	0.0690858	0.0359119	0.264616	0.0809779	0.076579	0.380143	0.271137	0.218024	0.466972	0.315614	0.317675
0.155054	0.0675247	0.0286014	0.300434	0.0822478	0.0970251	0.596901	0.287792	0.439115	0.694714	0.293349	0.568682
0.136869	0.0696143	0.0235792	0.234693	0.0693652	0.0598925	0.387146	0.167488	0.177934	0.61595	0.250318	0.442054
0.176106	0.0673401	0.0355479	0.280997	0.0806345	0.0854613	0.580527	0.300947	0.427581	0.655297	0.288424	0.512602
0.201279	0.0651403	0.0447564	0.373718	0.0917222	0.148078	0.692139	0.283685	0.559533	0.798917	0.277982	0.715543
0.173429	0.0675733	0.0346437	0.299283	0.0703911	0.0945254	0.442743	0.250982	0.259013	0.306249	0.28714	0.176238
0.206584	0.0667297	0.0471298	0.340882	0.0803654	0.122659	0.146688	0.107482	0.0330697	0.423909	0.218511	0.227446
0.114237	0.0697229	0.0179113	0.242454	0.0687111	0.063505	0.385938	0.265802	0.219599	0.508989	0.300577	0.349417
0.142894	0.0695308	0.0252533	0.279326	0.0807024	0.0845362	0.193703	0.141047	0.0574149	0.665154	0.237764	0.498961
0.210933	0.0679294	0.0491071	0.264395	0.0675868	0.0744726	0.748041	0.289043	0.643111	0.95664	0.303433	1.00723
0.129957	0.0656909	0.0212042	0.31203	0.0795842	0.103696	0.286814	0.17807	0.113971	0.861228	0.270319	0.814786
0.174403	0.0697225	0.0352778	0.275087	0.0704392	0.0806346	0.311122	0.151711	0.119813	0.484008	0.23928	0.291519
0.180322	0.0695943	0.0373595	0.333284	0.0905161	0.119271	0.345155	0.263288	0.188452	0.59036	0.246768	0.409419
0.165219	0.0702387	0.0322309	0.31883	0.0829916	0.10854	0.201656	0.152096	0.0637982	0.538001	0.248181	0.351038
0.139343	0.0674459	0.0239655	0.288588	0.0842396	0.0903793	0.50174	0.243938	0.311248	0.81722	0.289576	0.751702
0.175215	0.0672258	0.0352196	0.249919	0.068874	0.0672032	0.307427	0.132195	0.111987	0.647772	0.226309	0.470825
0.184625	0.0649067	0.0382992	0.303498	0.0700678	0.0970203	0.251637	0.144434	0.0841822	0.2939	0.20219	0.127258
0.21664	0.0676882	0.0515144	0.308815	0.0814874	0.102007	0.562203	0.312525	0.413744	0.920202	0.271875	0.920688
0.187992	0.0690291	0.0401059	0.294624	0.0712444	0.0918789	0.453797	0.253192	0.270038	0.597786	0.284311	0.43818
0.145851	0.0710597	0.0263221	0.343208	0.0807525	0.124313	0.822612	0.286984	0.759051	0.910778	0.284804	0.91063
0.16614	0.0702932	0.0325437	0.367406	0.089099	0.142926	0.655815	0.283112	0.510246	0.749811	0.310095	0.658375
0.168248	0.0666649	0.0327515	0.313722	0.0816536	0.105089	0.44489	0.251732	0.261296	0.651556	0.263779	0.494105
0.171061	0.0681522	0.0339065	0.300059	0.068347	0.0947069	0.429377	0.274772	0.259865	0.65356	0.285142	0.508446
0.118027	0.0667315	0.0183835	0.334098	0.0997201	0.121566	0.216405	0.1456	0.0680303	0.31579	0.206182	0.142234
0.183922	0.0714961	0.0389389	0.322178	0.0894739	0.111804	0.67953	0.280684	0.540544	0.56161	0.315916	0.415209
0.221633	0.0677046	0.0537053	0.321018	0.0800051	0.109453	0.141994	0.10218	0.0306029	0.275863	0.208943	0.119757
0.178654	0.0662838	0.0363108	0.348143	0.0812249	0.127801	0.320153	0.275113	0.178185	0.500593	0.297591	0.339154
0.164022	0.068155	0.0315484	0.299468	0.0793739	0.0959814	0.220678	0.142733	0.0690715	0.503824	0.264757	0.323935
0.107161	0.0700165	0.0163857	0.262509	0.0685202	0.073606	0.217375	0.157149	0.0719475	0.752521	0.259945	0.633859
0.158253	0.0661129	0.029415	0.341869	0.0885022	0.124707	0.364881	0.258819	0.200125	0.619118	0.257092	0.449403
0.201869	0.0661524	0.0451273	0.272722	0.069236	0.0791708	0.268584	0.137517	0.0910484	0.506422	0.258604	0.323339
0.180328	0.0667268	0.0369707	0.309108	0.0661217	0.0999197	0.519746	0.300491	0.360431	0.570564	0.316423	0.425667
0.174063	0.0677303	0.0348854	0.332314	0.0843428	0.117546	0.147855	0.128191	0.0382941	0.467262	0.236948	0.274478
0.179204	0.0705428	0.0370902	0.278104	0.07028	0.082281	0.697074	0.302792	0.577596	0.827125	0.26984	0.75695
0.173261	0.069619	0.0348661	0.307185	0.0830779	0.101265	0.350855	0.289906	0.207144	0.526098	0.295373	0.364024
0.241146	0.0702426	0.0630855	0.387872	0.0837347	0.157457	0.48662	0.325787	0.342936	0.667777	0.296073	0.533586
0.166287	0.0645418	0.0318169	0.393265	0.0998016	0.164618	0.15308	0.114424	0.0365262	0.433362	0.240654	0.245717
0.0954755	0.0658092	0.0134464	0.254299	0.0665258	0.0690934	0.170855	0.119164	0.0433916	0.481312	0.239054	0.288808
0.202233	0.0652482	0.0451554	0.410574	0.0911178	0.176873	0.2836	0.122694	0.0954828	0.41631	0.232417	0.227332
0.181215	0.0651505	0.0370833	0.296055	0.0803992	0.0941124	0.422134	0.142025	0.198368	0.465043	0.224349	0.266598
0.185011	0.0696233	0.0390766	0.282688	0.0699926	0.0848116	0.837127	0.299316	0.790372	0.869679	0.299181	0.845851
0.197388	0.0706913	0.0439591	0.339997	0.081247	0.122199	0.17249	0.0948806	0.0387552	0.578688	0.251069	0.397915
0.137553	0.0688377	0.0236594	0.307016	0.0805699	0.10075	0.187175	0.116048	0.0485016	0.406801	0.206359	0.208072
0.207782	0.0669752	0.0476591	0.34846	0.0834954	0.128396	0.271535	0.0925479	0.0822963	0.346423	0.18719	0.155049
0.203338	0.0669171	0.0458244	0.330124	0.08355	0.115962	0.615607	0.297675	0.467582	0.799428	0.279067	0.716964
0.208541	0.0663984	0.0478983	0.285579	0.0821175	0.0882986	0.408469	0.254024	0.231375	0.54503	0.287513	0.379722
0.256618	0.0692284	0.0706456	0.373458	0.0821597	0.146221	0.312171	0.17008	0.126378	0.609692	0.261316	0.44001
0.187986	0.0653852	0.0396141	0.329953	0.0825613	0.115685	0.334027	0.284004	0.192232	0.480349	0.266347	0.301676
0.224767	0.0722485	0.0557402	0.408119	0.0900832	0.174676	0.638406	0.273069	0.482129	0.962114	0.249426	0.987876
0.186983	0.0702406	0.0398966	0.256606	0.0687155	0.0705682	0.313957	0.286984	0.180929	0.573057	0.296448	0.416275
0.169219	0.0678869	0.0332437	0.288402	0.0868854	0.0907249	0.560971	0.288346	0.397831	0.668831	0.292712	0.533016
0.147356	0.0668308	0.0261802	0.216322	0.0689971	0.0515559	0.238526	0.133959	0.0748397	0.639134	0.257857	0.474983
0.164146	0.0672702	0.0314693	0.198634	0.0704209	0.0444145	0.212096	0.149962	0.0674735	0.277272	0.2512	0.139981
0.178905	0.0677981	0.0366035	0.345745	0.0820534	0.126273	0.331764	0.137048	0.12885	0.744837	0.267443	0.626308
0.1324	0.0687281	0.0222533	0.323288	0.0831592	0.111431	0.0988442	0.116289	0.0232932	0.394217	0.203413	0.196784
0.234676	0.0651885	0.0593223	0.366762	0.0906901	0.142739	0.485337	0.263144	0.304797	0.603217	0.287749	0.446671
0.13219	0.0662316	0.0218609	0.301507	0.0802843	0.0973519	0.292061	0.159784	0.110831	0.376044	0.214944	0.18761
0.215015	0.0668915	0.0507061	0.326929	0.0805163	0.113366	0.546878	0.298292	0.388053	0.547826	0.316529	0.400304
0.18886	0.0646376	0.0398462	0.40154	0.0972586	0.170694	0.300769	0.138679	0.109694	0.64348	0.265865	0.484751
0.179659	0.0675024	0.0368338	0.360206	0.0898343	0.137819	0.384764	0.122323	0.163006	0.930801	0.283152	0.946565
0.166782	0.0670557	0.0323128	0.263141	0.072537	0.074505	0.225274	0.115701	0.0641349	0.396785	0.27292	0.231924
0.139587	0.0650846	0.0237204	0.313669	0.0673702	0.102927	0.726156	0.314156	0.625996	0.854845	0.272183	0.804844
0.213676	0.0644118	0.0498063	0.324618	0.0772662	0.111347	0.287019	0.134412	0.100446	0.828301	0.236808	0.74216
0.172508	0.0672668	0.0342839	0.2686	0.0688152	0.0768817	0.671082	0.311195	0.547193	0.704388	0.304951	0.589157
0.103116	0.0666531	0.0150756	0.289694	0.0806282	0.0904236	0.555813	0.250736	0.371796	1.01574	0.275148	1.10743
0.138374	0.0680494	0.0237782	0.26329	0.0803042	0.0757703	0.249877	0.120234	0.076895	0.557822	0.238436	0.368017
0.205831	0.069394	0.047182	0.310488	0.0718435	0.101564	0.726479	0.323752	0.632587	0.782345	0.323454	0.716686
0.1459	0.0672761	0.025813	0.305431	0.0827915	0.100142	0.164134	0.131405	0.0442073	0.358384	0.247584	0.189737
0.190532	0.0652063	0.0405544	0.314388	0.0700589	0.103748	0.270321	0.294977	0.160085	0.450973	0.311134	0.300181
0.187931	0.067141	0.039826	0.371869	0.0894058	0.14628	0.14689	0.119325	0.0358151	0.436801	0.229933	0.243664
0.222862	0.0654902	0.0539563	0.382242	0.0899169	0.154194	0.4664	0.251354	0.280707	0.592012	0.254691	0.415345
0.191212	0.0703201	0.0415071	0.393327	0.0938309	0.163511	0.321384	0.163634	0.130064	1.00971	0.289353	1.10323
0.149942	0.0695152	0.0273151	0.309703	0.0801361	0.102338	0.360949	0.265871	0.200971	0.593286	0.250857	0.414918
0.112768	0.0656554	0.0170273	0.406792	0.099151	0.175311	0.545246	0.313622	0.395652	0.687273	0.307322	0.566791
0.145886	0.0689507	0.026037	0.246096	0.0694654	0.0653885	0.419029	0.257286	0.241781	0.754719	0.271504	0.643315
0.201189	0.0665842	0.0449103	0.30874	0.0731644	0.100674	0.157311	0.114548	0.0378681	0.435213	0.229294	0.241986
0.125035	0.0684562	0.0203199	0.281103	0.0709288	0.0840497	0.653746	0.325039	0.533034	0.803457	0.286333	0.727529
0.116464	0.0706309	0.0185527	0.337938	0.0808067	0.120732	0.424717	0.264078	0.250122	0.562266	0.260303	0.383901
0.149299	0.0680947	0.0269271	0.388803	0.103243	0.161827	0.217939	0.110593	0.0597284	0.583753	0.251625	0.404083
0.19978	0.0676904	0.044494	0.380946	0.0911149	0.153422	0.359704	0.270515	0.202565	0.392867	0.27296	0.228851
0.227728	0.0649227	0.056075	0.279689	0.067852	0.08283	0.318264	0.278528	0.17887	0.525097	0.306298	0.369545
0.208296	0.0659808	0.0477408	0.318488	0.0678399	0.106037	0.135571	0.100532	0.0284861	0.308676	0.225182	0.145988
0.206069	0.0707358	0.0474681	0.321881	0.0808608	0.110146	0.393719	0.172574	0.184796	0.958936	0.305843	1.0131
0.178057	0.0672092	0.0362215	0.335759	0.0821181	0.119477	0.242422	0.144388	0.0796165	0.322811	0.234207	0.15906
0.138968	0.0680704	0.0239458	0.271789	0.079919	0.0802563	0.288647	0.124502	0.0988175	0.599708	0.264905	0.429824
0.16135	0.0655359	0.0303287	0.25133	0.0808643	0.0697058	0.467982	0.244026	0.278556	0.899698	0.248179	0.871049
0.170608	0.067627	0.0336803	0.300075	0.068019	0.0946715	0.144618	0.112371	0.0335416	0.492491	0.262021	0.311202
0.188825	0.0663925	0.0400628	0.409323	0.0893115	0.175522	0.456614	0.258427	0.275281	0.731317	0.298821	0.624118
0.158117	0.0698114	0.0298745	0.407438	0.0895747	0.17403	0.487898	0.249254	0.300172	0.769316	0.267445	0.663373
0.170562	0.0685465	0.0337899	0.380586	0.102134	0.155277	0.602498	0.295804	0.450504	0.820331	0.288892	0.756402
0.141814	0.0684284	0.0247936	0.32987	0.0692569	0.113611	0.408488	0.355532	0.293265	0.516818	0.355789	0.393686
0.133641	0.0669567	0.0223432	0.30893	0.0771272	0.101386	0.181496	0.138883	0.0522293	0.608499	0.266825	0.441466
0.151999	0.0677901	0.0276991	0.26468	0.0705625	0.0750345	0.422936	0.254837	0.243817	0.505623	0.277541	0.332684
0.110947	0.06561	0.0166139	0.255194	0.0802365	0.0715621	0.286696	0.100517	0.0922981	0.586782	0.23051	0.397448
0.236164	0.0672858	0.060301	0.354876	0.0705265	0.130911	0.290158	0.295639	0.171594	0.388404	0.291504	0.235832
0.130709	0.0674663	0.0216367	0.235717	0.0723607	0.0607987	0.168135	0.142926	0.0486969	0.597324	0.28117	0.435852
0.187067	0.0664706	0.0394126	0.292524	0.0786249	0.091752	0.466244	0.264055	0.287109	0.607713	0.281558	0.44859
0.143709	0.0689788	0.0254104	0.285957	0.0711371	0.0868321	0.175358	0.11214	0.0433259	0.363362	0.226949	0.183538
0.171245	0.0682847	0.0339875	0.346433	0.0793026	0.126305	0.366075	0.275649	0.209994	0.735539	0.283521	0.621402
0.157525	0.0692552	0.0296106	0.340707	0.0817128	0.122758	0.158298	0.136019	0.0435594	0.313759	0.237186	0.154702
0.128663	0.0677754	0.0211477	0.225306	0.0691799	0.0555486	0.434675	0.264991	0.259162	0.607358	0.273439	0.443653
0.0742761	0.0647481	0.00970926	0.227297	0.0693899	0.0564791	0.393887	0.262967	0.224299	0.619911	0.301233	0.475032
0.237431	0.0686103	0.0610806	0.305492	0.0818074	0.100018	0.570942	0.295682	0.413403	0.575663	0.319675	0.43358
0.142716	0.0697814	0.0252372	0.330871	0.0678742	0.114083	0.402984	0.269841	0.23521	0.593946	0.26187	0.421347
0.178484	0.0677501	0.0364467	0.349679	0.0896517	0.130313	0.476822	0.246167	0.287957	0.561379	0.293193	0.401109
0.193376	0.0682474	0.0420521	0.311415	0.0827062	0.103819	0.409182	0.267924	0.239213	0.855155	0.238562	0.788201
0.260319	0.0676095	0.0723371	0.36739	0.0823777	0.141762	0.310647	0.164598	0.123594	0.463058	0.257089	0.280517
0.16409	0.0684801	0.0316151	0.294028	0.0794733	0.0927687	0.24713	0.0882116	0.0688548	0.360411	0.225541	0.180765
0.163501	0.0675895	0.0313009	0.361241	0.0795308	0.13682	0.0512253	0.107282	0.0141334	0.263708	0.230603	0.122719
0.174972	0.067089	0.0351163	0.203783	0.0678619	0.0461329	0.260916	0.136504	0.0867103	0.583973	0.256187	0.406657
0.183582	0.0700817	0.0386138	0.301764	0.0702587	0.0959979	0.381234	0.265451	0.215804	0.80454	0.267817	0.719011
0.208556	0.0664358	0.0479091	0.325909	0.0712986	0.1113	0.429974	0.268269	0.256846	0.711168	0.287806	0.588592
0.129098	0.0677903	0.0212619	0.353209	0.0808656	0.131296	0.283955	0.0928624	0.0892536	0.656121	0.243012	0.48955
0.168772	0.0698878	0.0333684	0.354351	0.0928711	0.13419	0.393955	0.251195	0.218299	0.426354	0.272502	0.256035
0.17627	0.0670163	0.0355623	0.365672	0.090996	0.141996	0.297919	0.118313	0.102753	0.599506	0.238311	0.416199
0.183551	0.0672965	0.0382198	0.255766	0.0662002	0.0697985	0.130476	0.109617	0.0290399	0.362976	0.15038	0.154366
0.180958	0.0682026	0.0373974	0.302017	0.0712144	0.0962855	0.233104	0.12678	0.0704106	0.668459	0.248176	0.508429
0.132668	0.0648417	0.0218051	0.273791	0.0697667	0.0798287	0.579027	0.301828	0.426372	0.809272	0.27635	0.731291
0.269167	0.0657444	0.076773	0.275613	0.0693877	0.0807774	0.278725	0.135897	0.0961555	0.4764	0.244614	0.286793
0.226372	0.0699616	0.0561389	0.313909	0.0701256	0.103456	0.305503	0.150571	0.116004	0.587162	0.262344	0.413584
0.149108	0.0658886	0.0265746	0.324711	0.0682086	0.11009	0.623196	0.270261	0.461414	0.766537	0.299939	0.677543
0.143064	0.0672421	0.0249887	0.296724	0.069346	0.0928541	0.243054	0.131971	0.0764916	0.330681	0.212222	0.154388
0.184769	0.0672051	0.0386563	0.351877	0.0800134	0.13022	0.153907	0.0958179	0.0328685	0.479742	0.226419	0.281418
0.190236	0.0658494	0.0405258	0.282872	0.068691	0.0847351	0.60189	0.333584	0.47355	0.788827	0.290516	0.706647
0.166729	0.0676498	0.0323752	0.365656	0.0901022	0.141823	0.666755	0.261458	0.512923	0.737341	0.284934	0.624858
0.158219	0.0656051	0.0293372	0.220806	0.0807714	0.0552791	0.252309	0.135486	0.0820164	0.382559	0.201723	0.187043
0.181957	0.0660465	0.0374705	0.323354	0.0787409	0.110758	0.174807	0.122775	0.0456312	0.587265	0.250979	0.407871
0.205624	0.0696472	0.0471318	0.355013	0.0927705	0.13464	0.320922	0.287538	0.185669	0.463574	0.318246	0.316182
0.139197	0.0690246	0.0241402	0.289699	0.0807156	0.0904406	0.230469	0.13636	0.0717099	0.36346	0.211328	0.176763
0.148794	0.068898	0.0268865	0.262984	0.0696565	0.0740124	0.418026	0.248234	0.236366	0.6312	0.285281	0.479798
0.226621	0.0681725	0.0560045	0.364541	0.0920633	0.141366	0.20252	0.0924084	0.0495536	0.0974297	0.17333	0.0395359
0.168723	0.0654585	0.0327523	0.319018	0.0818555	0.108473	0.32747	0.15243	0.130471	0.636068	0.280624	0.483333
0.16817	0.069436	0.0331026	0.266171	0.0701843	0.0757726	0.611563	0.275994	0.450182	0.943699	0.254371	0.955273
0.145998	0.0692178	0.0261065	0.408726	0.0904524	0.175239	0.580789	0.283102	0.417463	0.658497	0.282646	0.513507
0.175788	0.0693002	0.035704	0.212613	0.0708698	0.0502267	0.37148	0.172564	0.167775	0.617065	0.267391	0.452267
0.180654	0.0694745	0.0374625	0.413929	0.0903604	0.179502	0.298189	0.11713	0.102636	0.628467	0.249634	0.457287
0.18343	0.0692531	0.0384426	0.254146	0.0723137	0.0698195	0.311772	0.279659	0.175411	0.588359	0.281122	0.425196
0.193434	0.0697904	0.0422875	0.353453	0.081612	0.131589	0.234537	0.147993	0.0769096	0.622501	0.266012	0.45827
0.121374	0.0683517	0.0194035	0.439421	0.0908217	0.201339	0.0421328	0.131033	0.0189449	0.0430273	0.188647	0.0374391
0.209891	0.0665812	0.0484872	0.289267	0.0691906	0.0884628	0.6305	0.27139	0.471183	0.778591	0.282302	0.685899
0.202858	0.0683323	0.0458208	0.362884	0.0903672	0.139851	0.407767	0.265686	0.236863	0.663203	0.272489	0.514089
0.142537	0.0676873	0.0248985	0.296851	0.0683004	0.0927853	0.433489	0.246528	0.248688	0.708527	0.266515	0.57304
0.158113	0.068078	0.0296343	0.385477	0.0915223	0.156969	0.704407	0.326563	0.602834	0.904248	0.290894	0.902283
0.19956	0.0627183	0.0437578	0.459068	0.0975385	0.220257	0.348483	0.26822	0.193383	0.510382	0.271094	0.333982
0.174965	0.0683606	0.0352859	0.294998	0.0826019	0.093847	0.427893	0.261663	0.25156	0.795215	0.282665	0.712267
0.19645	0.0685472	0.0432914	0.264199	0.0685688	0.0745028	0.402735	0.263277	0.23151	0.626308	0.284308	0.473093
0.137183	0.067489	0.0233739	0.246936	0.0682458	0.0656348	0.513476	0.318219	0.364922	0.635719	0.291449	0.489081
0.196117	0.0680218	0.043089	0.313786	0.0924951	0.107017	0.407157	0.345412	0.285086	0.413466	0.36224	0.302172
0.199549	0.0657685	0.0441454	0.268612	0.0717504	0.0773006	0.606764	0.287358	0.450738	0.786713	0.281549	0.698187
0.121073	0.0684507	0.0193441	0.372063	0.0819019	0.145139	0.286147	0.289147	0.165486	0.494593	0.303787	0.336909
0.175441	0.0695781	0.0356207	0.351708	0.101717	0.134045	0.74206	0.305183	0.64379	0.868232	0.313475	0.852094
0.112066	0.0664092	0.0169689	0.261601	0.0802971	0.0748829	0.599979	0.274735	0.435454	0.844661	0.264996	0.783674
0.222886	0.068285	0.0543412	0.392969	0.0917483	0.162842	0.218671	0.147891	0.0696888	0.366726	0.195059	0.172536
0.162271	0.0670246	0.030824	0.297584	0.0807531	0.0950773	0.333083	0.286144	0.192823	0.75332	0.272887	0.641959
0.158688	0.0672721	0.0297074	0.324092	0.0915415	0.113416	0.525109	0.237524	0.332157	0.715125	0.264679	0.581458
0.203067	0.0673189	0.045768	0.296436	0.0686976	0.0925936	0.270079	0.150462	0.0955814	0.596756	0.270444	0.429258
0.1319	0.0675692	0.0219632	0.231588	0.069248	0.0584282	0.198878	0.149875	0.0620152	0.387093	0.234814	0.204978
0.176615	0.067871	0.0357994	0.359633	0.0820596	0.136069	0.472549	0.337869	0.337458	0.622923	0.298353	0.477048
0.169944	0.0678113	0.0334795	0.361215	0.099747	0.140426	0.211592	0.145659	0.0659879	0.5612	0.226122	0.366077
0.171049	0.0661445	0.0336329	0.317201	0.081239	0.107216	0.383821	0.259123	0.214463	0.6575	0.29717	0.520616
0.209333	0.0679744	0.0484409	0.322348	0.0669476	0.10839	0.470422	0.25254	0.285073	0.704873	0.272456	0.571078
0.128248	0.0682042	0.0210994	0.374572	0.102184	0.150746	0.421306	0.276329	0.253856	0.730925	0.247632	0.595573
0.175812	0.0671816	0.0354234	0.350908	0.0891062	0.131076	0.423971	0.25458	0.244562	0.653157	0.287303	0.509157
0.114286	0.0685953	0.0177666	0.397813	0.0997698	0.168209	0.319119	0.13591	0.120308	0.622705	0.263276	0.457076
0.153552	0.0659929	0.0279333	0.359551	0.0820972	0.136017	0.349823	0.277267	0.199253	0.617891	0.264488	0.451743
0.175748	0.0667189	0.0353387	0.279744	0.0721388	0.0834606	0.389295	0.268393	0.223586	0.85265	0.2979	0.815756
0.156327	0.0678638	0.0290437	0.262744	0.0830778	0.0759364	0.34996	0.118416	0.136494	0.489101	0.224509	0.289624
0.234618	0.0679826	0.0596671	0.385548	0.0798743	0.155027	0.164734	0.101458	0.0374311	0.499435	0.256067	0.315006
0.151746	0.0703753	0.0279795	0.348549	0.0905273	0.129682	0.275581	0.152895	0.0993217	0.652938	0.254469	0.491082
0.194727	0.0658619	0.0422563	0.308682	0.0809242	0.101833	0.487744	0.309773	0.333853	0.619825	0.296952	0.472363
0.135123	0.0662309	0.0226446	0.290928	0.0907426	0.0928735	0.133183	0.124174	0.0331568	0.446517	0.231629	0.25303
0.223978	0.0655874	0.0544677	0.313348	0.0824561	0.104986	0.392514	0.275049	0.229719	0.636759	0.292342	0.490926
0.152362	0.0674853	0.0277684	0.345353	0.0917842	0.127693	0.43694	0.333695	0.302269	0.649118	0.280651	0.500119
0.188923	0.0675771	0.0402587	0.42302	0.0919224	0.187396	0.130287	0.125311	0.0326774	0.23865	0.192263	0.093919
0.190383	0.0680979	0.0408829	0.454934	0.0910656	0.215258	0.536096	0.241923	0.345926	0.897355	0.273593	0.8801
0.147243	0.0691637	0.026464	0.259786	0.0720274	0.0726766	0.191238	0.115381	0.0498848	0.290608	0.195927	0.12284
0.122042	0.0663263	0.0192933	0.318655	0.0824953	0.108347	0.0946938	0.141227	0.0289121	0.540303	0.225163	0.342626
0.215179	0.0672726	0.0508275	0.292918	0.0812374	0.0924004	0.515028	0.315348	0.364698	0.620832	0.312429	0.483045
0.218722	0.0681788	0.0524877	0.411214	0.0904415	0.177276	0.568446	0.315228	0.422499	0.629147	0.314307	0.494616
0.139844	0.0694378	0.0243779	0.323817	0.0811635	0.111445	0.564921	0.304991	0.412155	0.729893	0.274102	0.607875
0.168943	0.0686868	0.0332595	0.292845	0.081002	0.0923196	0.54054	0.304968	0.385189	0.768113	0.289444	0.673776
0.193709	0.0697468	0.0423878	0.463956	0.100482	0.225352	0.236098	0.137098	0.074538	0.69143	0.275551	0.554004
0.141233	0.0683381	0.0246168	0.272905	0.0683447	0.079148	0.350694	0.284972	0.204195	0.63343	0.290453	0.485597
0.205039	0.0668909	0.0465154	0.343133	0.0901245	0.125863	0.35605	0.273582	0.201618	0.543429	0.296042	0.382956
0.188375	0.0681284	0.0401266	0.390699	0.10152	0.162952	0.465528	0.243892	0.2762	0.660213	0.272729	0.510262
0.167029	0.0693532	0.0327086	0.32227	0.0718899	0.109026	0.198154	0.134166	0.0572653	0.608034	0.243689	0.42909
0.198667	0.0659942	0.043824	0.307243	0.0679809	0.0990198	0.185362	0.136398	0.0529633	0.617559	0.256072	0.446952
0.180069	0.071368	0.0375184	0.261776	0.0721441	0.0737314	0.500864	0.322434	0.354829	0.519901	0.330135	0.379287
0.137722	0.0665528	0.0233965	0.350079	0.090189	0.13069	0.490252	0.23227	0.294296	0.908235	0.294406	0.911565
0.172324	0.0679796	0.0343169	0.250233	0.0696955	0.0674742	0.55622	0.244971	0.369391	0.538286	0.276624	0.366273
0.234241	0.0670549	0.0593652	0.372401	0.0812948	0.145292	0.56897	0.292447	0.409252	0.752251	0.292928	0.651689
0.150092	0.0667627	0.0269847	0.298329	0.071552	0.0941197	0.575324	0.297592	0.419559	0.727519	0.294188	0.61583
0.124903	0.0671801	0.020114	0.220572	0.0699137	0.0535398	0.146633	0.0966548	0.0308435	0.286469	0.278697	0.159736
0.190818	0.0701387	0.0413308	0.27318	0.071657	0.079762	0.273758	0.184557	0.109005	0.44701	0.249659	0.262148
0.217179	0.0683173	0.0518338	0.316141	0.0709997	0.104986	0.254944	0.286257	0.14694	0.433542	0.297935	0.276724
0.20486	0.069302	0.0467702	0.29964	0.0810071	0.0963465	0.460317	0.235692	0.267442	0.581927	0.277484	0.415636
0.213917	0.0690081	0.0505226	0.307019	0.0683638	0.0989343	0.688489	0.320476	0.576722	0.803039	0.286298	0.726838
0.154488	0.0698038	0.0287392	0.343734	0.0911678	0.126464	0.428666	0.254279	0.248412	0.522738	0.270841	0.34661
0.213837	0.0698045	0.0505988	0.388213	0.0819164	0.15742	0.339674	0.282136	0.194979	0.511188	0.298705	0.350539
0.128741	0.0688276	0.0213114	0.265936	0.0722668	0.0759447	0.451662	0.275149	0.279705	0.481428	0.291833	0.31694
0.210821	0.0657236	0.0487652	0.270438	0.0693122	0.0779409	0.186767	0.128572	0.0514126	0.376821	0.233458	0.196496
0.137073	0.0667231	0.023241	0.294513	0.0689422	0.091491	0.124325	0.159387	0.0408607	0.585569	0.254311	0.407565
0.134052	0.0651222	0.0222108	0.296026	0.0802848	0.0940769	0.662991	0.265777	0.510195	0.865828	0.269869	0.822487
0.177877	0.0657186	0.0359592	0.294399	0.0815118	0.0933152	0.409605	0.282801	0.247752	0.453392	0.30969	0.301472
0.218694	0.0650927	0.0520641	0.334248	0.0706187	0.116709	0.381767	0.268689	0.217939	0.813123	0.30573	0.75464
0.212964	0.0655494	0.0496502	0.322753	0.0682822	0.108832	0.760651	0.303326	0.670596	0.877439	0.277148	0.846711
0.208571	0.0659788	0.0478549	0.24654	0.0702272	0.0657139	0.336965	0.293304	0.199573	0.362026	0.336927	0.244583
0.167268	0.0650963	0.032216	0.395795	0.0902181	0.164793	0.15134	0.130513	0.0399374	0.535905	0.262487	0.356094
0.138044	0.067155	0.0235661	0.277159	0.0828839	0.0836866	0.37777	0.263346	0.212061	0.442229	0.254454	0.260313
0.227922	0.0702108	0.0568778	0.261365	0.0689434	0.0730649	0.61638	0.288061	0.462904	0.691841	0.279717	0.556886
0.135326	0.0669756	0.0227988	0.27994	0.0797804	0.0847316	0.600839	0.269659	0.433724	0.786435	0.29854	0.707606
0.193243	0.0661807	0.0417229	0.340197	0.0936233	0.124499	0.242501	0.168024	0.0870386	0.541557	0.258557	0.360136
0.167797	0.0661643	0.0325337	0.309088	0.0811085	0.102114	0.404849	0.26991	0.236754	0.577172	0.257247	0.399304
0.202359	0.0698515	0.0458285	0.32561	0.0807996	0.11255	0.252976	0.146509	0.085462	0.482973	0.251113	0.296321
0.151595	0.0662927	0.0273758	0.310702	0.0784861	0.102696	0.212359	0.115734	0.0584906	0.343306	0.212727	0.163112
0.259517	0.0638637	0.0714278	0.305347	0.0701731	0.0981611	0.258179	0.158634	0.0918213	0.514972	0.24444	0.324948
0.175528	0.068598	0.0355157	0.269004	0.0685683	0.0770648	0.216386	0.135167	0.0650929	0.188301	0.220236	0.0839611
0.23345	0.068141	0.0591423	0.3892	0.0911921	0.159793	0.162365	0.138713	0.0456036	0.491158	0.235444	0.29667
0.122996	0.0705129	0.0201001	0.277151	0.0820358	0.0835424	0.389161	0.267189	0.222836	0.720442	0.269321	0.591571
0.209657	0.0670738	0.0484548	0.418602	0.0893819	0.183216	0.172622	0.115932	0.0432386	0.245075	0.192452	0.0970999
0.151085	0.0688782	0.027571	0.329325	0.0787569	0.114657	0.44055	0.266687	0.265207	0.666005	0.277303	0.520459
0.129114	0.0665881	0.0211043	0.36955	0.0897553	0.144624	0.667983	0.259849	0.513723	0.766462	0.266367	0.658415
0.208329	0.0697158	0.0482611	0.391184	0.092	0.161489	0.355345	0.278534	0.203852	0.585793	0.282138	0.422755
0.207217	0.0679353	0.0475542	0.278679	0.0688324	0.0823997	0.192287	0.135989	0.0554672	0.337742	0.224032	0.16426
0.19755	0.0664433	0.0434406	0.318809	0.0885351	0.109478	0.398014	0.26296	0.227563	0.537515	0.287183	0.371396
0.135495	0.0688065	0.0230931	0.436868	0.089453	0.198855	0.452546	0.262506	0.273707	0.844817	0.299501	0.803417
0.196759	0.0671905	0.0432287	0.282339	0.0687679	0.0844442	0.14862	0.100279	0.0321437	0.334123	0.23311	0.165979
0.176689	0.0705016	0.0361896	0.313886	0.0817367	0.105206	0.646311	0.27966	0.495927	0.584412	0.32425	0.446676
0.197729	0.0676275	0.0436703	0.345307	0.0810304	0.125803	0.67952	0.300568	0.552088	0.727556	0.282497	0.609142
0.223528	0.0689403	0.0547174	0.321997	0.0706723	0.108677	0.197713	0.144947	0.0601	0.445337	0.270081	0.271269
0.137071	0.0678145	0.0233872	0.228893	0.0696457	0.0572425	0.165721	0.136482	0.0460908	0.354893	0.211918	0.170859
0.174813	0.068887	0.0353051	0.225363	0.0673139	0.0553196	0.39384	0.287457	0.237741	0.675683	0.275043	0.532195
0.189862	0.0689994	0.0408084	0.391716	0.0912392	0.161766	0.189032	0.121107	0.0503999	0.412788	0.213519	0.215984
0.126361	0.0627879	0.0199093	0.298033	0.0804033	0.0952884	0.209959	0.160817	0.069945	0.290262	0.23642	0.140147
0.151657	0.0660152	0.0273579	0.340948	0.0822434	0.123009	0.082924	0.0883986	0.0146907	0.288011	0.225434	0.133771
0.149547	0.0664629	0.0267817	0.251289	0.0729664	0.0684705	0.545409	0.299163	0.38697	0.689661	0.276144	0.551888
0.247768	0.0691578	0.0661719	0.312519	0.0833047	0.104607	0.322592	0.277127	0.180865	0.460484	0.289466	0.295836
0.15354	0.0662023	0.0279572	0.383286	0.080589	0.153402	0.640128	0.311828	0.507	0.755224	0.292248	0.655772
0.152324	0.0699571	0.0280965	0.238941	0.0687428	0.0618184	0.472557	0.270336	0.296391	0.8065	0.284517	0.731392
0.165247	0.066479	0.031726	0.322016	0.0883539	0.111501	0.123447	0.092519	0.0237988	0.215021	0.231851	0.0999888
0.132247	0.0656497	0.021799	0.197184	0.0693586	0.0436921	0.590087	0.295027	0.435243	0.7267	0.272904	0.602569
0.1602	0.0667271	0.0301165	0.407244	0.089827	0.173916	0.627172	0.277678	0.47045	0.845532	0.242085	0.77353
0.216569	0.0686887	0.0516204	0.354191	0.0814271	0.132082	0.0496704	0.117239	0.0162121	0.300866	0.192463	0.127562
0.144533	0.0674027	0.025433	0.267556	0.0682096	0.0762388	0.300905	0.147586	0.112326	0.594423	0.219409	0.401479
0.156981	0.0675729	0.0292091	0.314328	0.0816641	0.105471	0.721412	0.287636	0.603171	0.862905	0.280736	0.823417
0.171083	0.0662784	0.0336622	0.340671	0.0903622	0.124222	0.32013	0.137104	0.121281	0.721255	0.243486	0.579495
0.206272	0.0689725	0.0473052	0.349941	0.0826971	0.129297	0.564445	0.299999	0.408597	0.631545	0.309642	0.494727
0.144689	0.0684558	0.025621	0.254383	0.0719442	0.0698867	0.414172	0.252222	0.235154	0.648357	0.274365	0.495642
0.189231	0.0669782	0.0402945	0.243078	0.0648532	0.0632931	0.455999	0.278317	0.285395	0.57356	0.30261	0.420544
0.172264	0.0679786	0.034296	0.279236	0.0711109	0.0830295	0.339388	0.270279	0.188235	0.449769	0.289638	0.286182
0.196565	0.0644287	0.0427888	0.38915	0.0923807	0.159972	0.291333	0.164402	0.111903	0.781129	0.281531	0.689422
0.1917	0.0641158	0.0408597	0.292821	0.081486	0.0923843	0.40038	0.282794	0.240277	0.4779	0.310365	0.324715
0.235666	0.0668693	0.0600101	0.349503	0.0809447	0.128704	0.690245	0.266114	0.547254	0.893053	0.26275	0.866581
0.198486	0.0702977	0.0443386	0.308517	0.0696866	0.100039	0.512612	0.248837	0.324691	0.757863	0.28515	0.655666
0.178047	0.0696704	0.0365546	0.374278	0.0895733	0.148107	0.120507	0.0905411	0.0227197	0.182364	0.21271	0.0785025
0.170638	0.0680421	0.0337471	0.34414	0.0819506	0.125148	0.140048	0.121341	0.0343371	0.455217	0.21539	0.253615
0.162658	0.0698512	0.0313369	0.306611	0.080395	0.100473	0.228711	0.115097	0.0655561	0.295203	0.213941	0.132916
0.167365	0.0657558	0.0323347	0.220383	0.0689567	0.0533238	0.358379	0.268914	0.20075	0.425812	0.281916	0.260792
0.212478	0.068285	0.0498099	0.304457	0.0812662	0.0992981	0.614599	0.2837	0.458217	0.825515	0.293626	0.767691
0.173524	0.0682469	0.0347684	0.352916	0.0829855	0.131436	0.609542	0.275858	0.447639	0.57925	0.294517	0.422271
0.178194	0.068536	0.0364502	0.267213	0.0830354	0.0782977	0.384587	0.276245	0.224218	0.647833	0.263032	0.488874
0.137687	0.0703684	0.0239093	0.202875	0.0683695	0.0458325	0.289291	0.138774	0.102948	0.722883	0.245114	0.582641
0.19512	0.0664237	0.0424841	0.456866	0.105269	0.219808	0.429345	0.257974	0.250888	0.793839	0.276178	0.706456
0.158937	0.0669749	0.0297465	0.429848	0.110094	0.19689	0.621358	0.327462	0.493317	0.850036	0.304376	0.815206
0.162659	0.0712065	0.0315282	0.303952	0.0811409	0.0989705	0.483916	0.263968	0.303853	0.719708	0.305578	0.611357
0.158562	0.0663727	0.0295472	0.218898	0.0725686	0.0531825	0.253865	0.112628	0.0771328	0.185677	0.190682	0.0708353
0.158152	0.0694645	0.0298373	0.316375	0.0781052	0.106194	0.320078	0.144519	0.123335	0.567847	0.25319	0.386555
0.149519	0.0690148	0.0271189	0.4493	0.100271	0.211924	0.353523	0.174415	0.155399	0.949237	0.287203	0.983537
0.189928	0.0669099	0.0405496	0.287111	0.0718383	0.0875937	0.194239	0.161517	0.0638166	0.4762	0.24328	0.285952
0.157513	0.0688265	0.0295474	0.356276	0.0824353	0.133728	0.730137	0.280014	0.611508	0.865982	0.257112	0.81603
0.193602	0.0699981	0.0423814	0.287983	0.0685819	0.0876379	0.195442	0.140616	0.0579704	0.606309	0.273572	0.442453
0.115515	0.0719842	0.0185254	0.347917	0.0918293	0.129479	0.621643	0.327523	0.493712	0.888173	0.257061	0.854932
0.248648	0.0652548	0.066084	0.356838	0.0805427	0.133821	0.234667	0.150298	0.0776579	0.458048	0.214697	0.255903
0.140766	0.0699563	0.0247089	0.391021	0.100033	0.162904	0.201341	0.151259	0.0634176	0.422348	0.252882	0.242327
0.194511	0.0683349	0.042504	0.415039	0.101863	0.182634	0.50031	0.224788	0.30084	0.669042	0.275895	0.523735
0.134348	0.0690925	0.022823	0.348329	0.0822477	0.128098	0.54022	0.244081	0.351413	0.857884	0.25388	0.80042
0.170737	0.0671387	0.0336586	0.283862	0.0731979	0.0859355	0.207083	0.132852	0.0605332	0.509848	0.253148	0.324029
0.152242	0.0692696	0.0279759	0.271007	0.0696288	0.0782927	0.572034	0.298759	0.416479	0.807456	0.292499	0.737541
0.150611	0.0675127	0.0272415	0.32472	0.0834791	0.112412	0.358427	0.267322	0.199931	0.470522	0.279742	0.299647
0.173998	0.0688456	0.0350149	0.256189	0.0718682	0.0707979	0.19193	0.15019	0.059394	0.622707	0.223918	0.437903
0.181517	0.0638226	0.0370218	0.319835	0.0816588	0.108962	0.443711	0.256647	0.262747	0.609895	0.288822	0.45539
0.233882	0.0658563	0.0590379	0.280555	0.0685277	0.0834071	0.345941	0.0963006	0.128949	0.767057	0.242835	0.647345
0.171694	0.0665907	0.0339133	0.262342	0.0721836	0.074034	0.563859	0.296363	0.405768	0.856187	0.275001	0.808683
0.221246	0.068147	0.0535938	0.30473	0.0823433	0.0996407	0.355048	0.280255	0.204602	0.608436	0.310439	0.466566
0.0882939	0.0690611	0.0125653	0.223766	0.069365	0.0548826	0.250518	0.148654	0.0848575	0.494909	0.249424	0.307147
0.174916	0.0676328	0.0351697	0.313268	0.0820623	0.104871	0.358473	0.263864	0.198127	0.754068	0.298806	0.657904
0.108567	0.0667235	0.0162389	0.277574	0.0797247	0.0834034	0.138308	0.144467	0.0399998	0.26019	0.198268	0.107009
0.193911	0.0682098	0.0422539	0.350026	0.0910136	0.130802	0.274336	0.285577	0.156814	0.555085	0.292479	0.393663
0.256352	0.0710167	0.0707598	0.340245	0.0809914	0.122326	0.175144	0.0929965	0.0393238	0.499826	0.21331	0.295327
0.215132	0.0675302	0.0508423	0.329194	0.0810076	0.114931	0.638251	0.324842	0.512886	0.829062	0.292245	0.77275
0.1905	0.0708062	0.0413036	0.271917	0.0692916	0.0787401	0.385611	0.268681	0.220886	0.510397	0.25993	0.328069
0.189954	0.0635171	0.040117	0.34674	0.0932479	0.128924	0.429833	0.260927	0.252839	0.660236	0.296494	0.523821
0.177018	0.0674894	0.0358904	0.335602	0.0842698	0.11973	0.187348	0.123437	0.050336	0.445141	0.199499	0.23795
0.245795	0.0656793	0.0647292	0.479803	0.0988348	0.239979	0.354641	0.283078	0.205903	0.6956	0.285886	0.56559
0.202483	0.0675218	0.0455584	0.282207	0.0824919	0.0864458	0.702663	0.316021	0.593605	0.75883	0.319093	0.677644
0.184547	0.0676779	0.0386379	0.282906	0.0743547	0.0855646	0.457484	0.333291	0.320374	0.598148	0.301799	0.448863
0.178888	0.0701789	0.036926	0.41277	0.0925393	0.178942	0.430079	0.276015	0.261152	0.544282	0.282272	0.37592
0.186235	0.0703931	0.0396388	0.263823	0.0814471	0.0762362	0.370959	0.276127	0.213857	0.661085	0.271205	0.510586
0.171999	0.0671261	0.0340896	0.254801	0.0661051	0.0692935	0.4717	0.260622	0.290425	0.823317	0.239204	0.735069
0.225608	0.0641798	0.055018	0.451068	0.0928614	0.212085	0.481802	0.323689	0.336908	0.724736	0.291752	0.610361
0.18271	0.0651199	0.0376236	0.318271	0.0844731	0.108432	0.487886	0.317774	0.339013	0.658378	0.302688	0.525082
0.206636	0.069025	0.047463	0.32888	0.0681082	0.112801	0.427278	0.264178	0.252356	0.835318	0.24187	0.756257
0.127212	0.0665263	0.0206086	0.28572	0.0679156	0.0862483	0.378014	0.27285	0.217342	0.528193	0.311413	0.375966
0.205633	0.068279	0.0469469	0.327628	0.0794708	0.113656	0.523162	0.316817	0.374072	0.7521	0.276796	0.64227
0.211448	0.065979	0.0490634	0.376577	0.0800929	0.148225	0.201884	0.127286	0.0569589	0.449208	0.24781	0.263197
0.242543	0.0664818	0.063247	0.256595	0.066661	0.0702845	0.161407	0.112177	0.0386361	0.506219	0.247462	0.317495
0.186152	0.0698652	0.0395337	0.312435	0.0674915	0.102171	0.327572	0.120223	0.121757	0.830433	0.258219	0.756296
0.137711	0.0671453	0.0234727	0.225797	0.0826004	0.057807	0.411213	0.269937	0.241962	0.760829	0.281529	0.65812
0.135907	0.0668778	0.0229434	0.331808	0.0921088	0.11858	0.275768	0.295423	0.163323	0.487532	0.296536	0.325621
0.120231	0.0700041	0.0193561	0.355636	0.0919763	0.134936	0.253836	0.176572	0.0956105	0.612959	0.269081	0.448123
0.175544	0.0683359	0.0354855	0.381312	0.0918759	0.15384	0.552815	0.31269	0.403379	0.850609	0.281251	0.802638
0.204753	0.0696167	0.0467702	0.306052	0.0775437	0.0996806	0.302733	0.161176	0.117625	0.606567	0.266122	0.438744
0.206308	0.0699751	0.0474595	0.354379	0.067963	0.130203	0.439726	0.248535	0.255129	0.574893	0.284088	0.411208
0.177471	0.0687193	0.0362184	0.270432	0.0684328	0.0778163	0.110765	0.139625	0.0317641	0.593739	0.268076	0.424391
0.154384	0.0669754	0.0283202	0.311975	0.0832004	0.104251	0.26772	0.114692	0.084828	0.423354	0.230467	0.232344
0.213276	0.0666313	0.0499264	0.253424	0.0715751	0.0693467	0.307966	0.282026	0.174382	0.533886	0.292502	0.370591
0.205002	0.0651661	0.0462725	0.348279	0.0825107	0.128106	0.363913	0.276785	0.209043	0.370857	0.289279	0.221217
0.156884	0.0689728	0.0293698	0.274009	0.0703062	0.0800237	0.698857	0.301037	0.579024	0.697055	0.307346	0.580348
0.1772	0.0677908	0.0359956	0.302735	0.0834412	0.0986109	0.413916	0.263868	0.240953	0.700812	0.258449	0.557934
0.176152	0.0715495	0.0361488	0.241183	0.0715222	0.0632846	0.135021	0.113348	0.0310784	0.415988	0.212891	0.218368
0.19927	0.0666961	0.0441568	0.402109	0.0992311	0.171538	0.186831	0.16561	0.0623325	0.647584	0.281414	0.498559
0.174049	0.0651265	0.0345346	0.35456	0.0806404	0.132215	0.231498	0.135931	0.0720687	0.807677	0.266023	0.723111
0.179724	0.0682251	0.0369553	0.27563	0.0691875	0.080759	0.255738	0.144829	0.0863771	0.59196	0.24784	0.411842
0.235514	0.0668017	0.0599292	0.377682	0.0820714	0.14938	0.16201	0.0943342	0.0351462	0.596679	0.250209	0.41863
0.157211	0.0686658	0.0294302	0.402855	0.0902109	0.17043	0.19367	0.115069	0.0507489	0.564766	0.227782	0.370845
0.17959	0.0692446	0.0370474	0.355964	0.100237	0.136758	0.562756	0.286903	0.399008	0.774977	0.279238	0.678564
0.214934	0.0677502	0.0507868	0.327341	0.0837585	0.114168	0.169132	0.0983531	0.0382789	0.31093	0.217261	0.14388
0.208619	0.0686866	0.0482396	0.311049	0.0793502	0.103048	0.290971	0.277654	0.161756	0.442511	0.282688	0.275728
0.220607	0.0654116	0.0529459	0.322924	0.0679025	0.108891	0.26653	0.134323	0.0890809	0.437893	0.224488	0.242145
0.21012	0.0682204	0.0488046	0.352848	0.0917762	0.132924	0.261194	0.14278	0.0886084	1.0059	0.282233	1.09148
0.138139	0.0631203	0.0230664	0.277535	0.0672803	0.0815525	0.336956	0.112187	0.126125	0.496854	0.235115	0.302143
0.0899375	0.068579	0.0127918	0.212164	0.0657973	0.0493428	0.257626	0.149366	0.0886816	0.468118	0.251557	0.282415
0.216348	0.0645837	0.0509775	0.340441	0.0897837	0.123961	0.20726	0.118333	0.0569593	0.697414	0.2322	0.540303
0.173689	0.0686538	0.0348813	0.308036	0.0803656	0.101345	0.466895	0.253479	0.282243	0.751732	0.25831	0.631825
0.16713	0.0660628	0.0322967	0.317681	0.079824	0.107293	0.595052	0.293518	0.44024	0.570297	0.311932	0.422541
0.20001	0.0671608	0.0445147	0.302129	0.0700052	0.0961829	0.333133	0.280257	0.189521	0.660114	0.284894	0.516914
0.211038	0.0660586	0.0489008	0.338364	0.0698951	0.119375	0.448774	0.329102	0.309706	0.627672	0.309304	0.48964
0.170053	0.0676123	0.0334895	0.327899	0.0838557	0.11455	0.431104	0.254538	0.25064	0.726295	0.262225	0.596266
0.146726	0.0698609	0.0264092	0.331818	0.0804973	0.116583	0.664766	0.305785	0.535417	0.76155	0.310639	0.676456
0.210075	0.0690483	0.048899	0.319544	0.0847732	0.109295	0.557131	0.300213	0.400522	0.585496	0.311021	0.43954
0.134224	0.0676346	0.0225904	0.255264	0.0690404	0.0699263	0.440641	0.331008	0.303731	0.637421	0.314723	0.505357
0.183448	0.0675551	0.038217	0.289479	0.0684258	0.08848	0.152377	0.150643	0.045912	0.320037	0.268593	0.174566
0.168321	0.0662157	0.0327165	0.26053	0.0692086	0.072666	0.481447	0.313285	0.329939	0.644262	0.304728	0.507933
0.181253	0.0683518	0.0375245	0.278263	0.0687723	0.0821601	0.26543	0.135447	0.0887988	0.679928	0.25364	0.526635
0.184428	0.0668159	0.0384781	0.399437	0.0906074	0.16776	0.512771	0.317531	0.36376	0.74754	0.273483	0.63361
0.183532	0.0680356	0.0383128	0.271139	0.0667327	0.0779695	0.296653	0.147035	0.109622	0.73009	0.25045	0.595757
0.121525	0.0671005	0.0192708	0.302933	0.068371	0.096443	0.414005	0.272426	0.245616	0.791114	0.292455	0.711392
0.188071	0.0673057	0.0399006	0.285076	0.0703472	0.0862169	0.68191	0.267307	0.536454	0.850022	0.288291	0.805649
0.199426	0.0643646	0.0439137	0.239449	0.0687826	0.0620668	0.378158	0.283418	0.223329	0.718047	0.275108	0.591276
0.157035	0.0679691	0.0292798	0.256895	0.0693717	0.0708073	0.417011	0.249415	0.236106	0.557885	0.264601	0.381249
0.153331	0.06739	0.0280517	0.310834	0.0829086	0.103491	0.254607	0.153751	0.0884641	0.457645	0.261079	0.277601
0.19866	0.0667465	0.0439209	0.437533	0.0986142	0.20116	0.335444	0.282954	0.192586	0.548335	0.274746	0.376156
0.229068	0.068486	0.0571626	0.289021	0.0693083	0.088337	0.545401	0.305509	0.390798	0.709366	0.269022	0.575574
0.188297	0.0682513	0.0401139	0.439835	0.0978933	0.203038	0.337868	0.279834	0.192461	0.499841	0.289164	0.333457
0.197132	0.0684368	0.0435446	0.307788	0.0693529	0.0995435	0.389888	0.255331	0.217207	0.783304	0.265467	0.684037
0.187105	0.0692398	0.0398026	0.326629	0.0784019	0.112834	0.629435	0.271478	0.469888	0.911642	0.266176	0.90194
0.131842	0.0669033	0.0218584	0.241408	0.0665276	0.0627039	0.272858	0.134472	0.0925342	0.422221	0.242576	0.237114
0.11352	0.067625	0.0174599	0.27521	0.0688471	0.0804805	0.446669	0.276125	0.275758	0.648003	0.312436	0.517523
0.197031	0.0682195	0.0434751	0.413571	0.100152	0.181072	0.391124	0.268501	0.225071	0.474129	0.263076	0.294008
0.214999	0.066847	0.0506929	0.401599	0.0914804	0.16965	0.390883	0.266726	0.223932	0.459526	0.290272	0.295422
0.240583	0.0677659	0.0624722	0.306671	0.082923	0.100923	0.442513	0.251687	0.259164	0.546662	0.280583	0.377567
0.10659	0.0709383	0.0163936	0.254258	0.0720556	0.0698394	0.286225	0.121044	0.0965764	0.581912	0.254945	0.403618
0.165978	0.0662531	0.0319382	0.285731	0.0833784	0.0885944	0.532452	0.317609	0.38438	0.726365	0.303326	0.619613
0.182425	0.0688174	0.0380146	0.381828	0.0895722	0.153816	0.379341	0.148109	0.165836	0.867527	0.246413	0.813322
0.186978	0.066848	0.0394293	0.293468	0.0815461	0.0927734	0.438017	0.252724	0.255729	0.545147	0.29799	0.385983
0.20405	0.0672937	0.0461648	0.295787	0.0678593	0.0920949	0.186988	0.13692	0.0537116	0.817499	0.244239	0.727958
0.172549	0.0717367	0.0349194	0.395268	0.0920805	0.164715	0.696208	0.295062	0.571767	0.845281	0.316562	0.814712
0.179429	0.070099	0.0371086	0.29702	0.0730389	0.0935556	0.336363	0.273147	0.18775	0.492105	0.279969	0.32055
0.130823	0.0657293	0.0214349	0.321711	0.0813338	0.110113	0.37299	0.278862	0.216886	0.595346	0.285115	0.435727
0.140705	0.0680024	0.0244223	0.414718	0.107899	0.183633	0.401889	0.258574	0.228375	0.632844	0.268929	0.472815
0.204976	0.0658698	0.0463539	0.324461	0.0825741	0.112093	0.660268	0.356073	0.562742	0.735158	0.335292	0.652877
0.162482	0.068828	0.0311377	0.275133	0.0711998	0.0807676	0.12629	0.130835	0.033067	0.27703	0.212569	0.121931
0.18477	0.0684661	0.0388277	0.278139	0.0699525	0.0822549	0.128154	0.113864	0.0293885	0.534789	0.25746	0.352285
0.163701	0.0687823	0.0315289	0.282451	0.069528	0.0846128	0.373304	0.256816	0.20531	0.438346	0.293369	0.278212
0.154584	0.0679954	0.0285195	0.362801	0.0808859	0.138167	0.121052	0.121345	0.0293781	0.547999	0.236118	0.356055
0.183328	0.0675431	0.0381713	0.346615	0.0800302	0.126547	0.698955	0.259694	0.555979	1.03131	0.270247	1.13663
0.234831	0.0703743	0.0600983	0.504744	0.116377	0.26831	0.732745	0.322347	0.640823	0.809773	0.33216	0.766062
0.128361	0.0688333	0.0212146	0.226968	0.0712634	0.0565929	0.296593	0.121882	0.102822	0.516007	0.254868	0.331221
0.141309	0.0649364	0.0241851	0.353632	0.082964	0.131938	0.559547	0.344144	0.431528	0.684995	0.312279	0.566736
0.205467	0.0668776	0.0466891	0.384376	0.089802	0.15581	0.155052	0.0879882	0.0317831	0.151692	0.20094	0.0633874
0.153439	0.0679763	0.0281644	0.359622	0.0822158	0.136087	0.340571	0.283355	0.196279	0.498307	0.295345	0.335538
0.179598	0.0700185	0.0371579	0.34615	0.0908217	0.128069	0.163276	0.17005	0.0555761	0.545245	0.248242	0.358917
0.175635	0.0692907	0.0356488	0.32692	0.091152	0.115185	0.416362	0.287412	0.255963	0.477566	0.31214	0.325501
0.193837	0.0687827	0.042304	0.283084	0.0701963	0.085064	0.272212	0.140739	0.0939067	0.549161	0.230478	0.354698
0.208274	0.0672521	0.047901	0.47516	0.0904127	0.233951	0.253014	0.133717	0.0818962	0.507396	0.212941	0.302795
0.189525	0.0659572	0.0402701	0.356964	0.0918121	0.135852	0.541753	0.313709	0.391909	0.710386	0.310283	0.600924
0.159467	0.0706559	0.030422	0.346428	0.09268	0.128602	0.464815	0.245841	0.27649	0.708793	0.270639	0.575633
0.169784	0.0674176	0.0333719	0.409632	0.0911711	0.176111	0.196611	0.11393	0.0516358	0.480132	0.234746	0.285633
0.174808	0.0726923	0.0358421	0.352927	0.0902912	0.13271	0.363915	0.149365	0.154744	0.831925	0.246553	0.752888
0.209505	0.0710251	0.0489368	0.302849	0.070622	0.0967052	0.570703	0.295605	0.413085	0.694248	0.304025	0.574411
0.223638	0.0674602	0.0545649	0.392502	0.0924131	0.162598	0.608861	0.282018	0.450245	0.853533	0.262239	0.797289
0.108375	0.066982	0.0162317	0.285127	0.0694521	0.086121	0.342956	0.261654	0.186082	0.620775	0.260369	0.453154
0.120184	0.0686737	0.0191603	0.266568	0.0698376	0.0759355	0.441596	0.244115	0.2546	0.718981	0.274473	0.592269
0.188342	0.0684875	0.0401633	0.300021	0.0808657	0.0965517	0.360317	0.162445	0.156216	0.495516	0.23737	0.30188
0.200453	0.0670188	0.044673	0.273318	0.0688796	0.079447	0.506875	0.31648	0.357082	0.707276	0.291905	0.585448
0.153691	0.0657047	0.0279381	0.311337	0.0708169	0.101946	0.516652	0.32394	0.371867	0.814279	0.304941	0.75604
0.211148	0.0680878	0.0492196	0.369975	0.0905596	0.145083	0.433363	0.332766	0.298536	0.583792	0.298914	0.430162
0.157139	0.0679991	0.0293166	0.362101	0.0914442	0.139479	0.462549	0.246567	0.274747	0.895807	0.243014	0.861527
0.144242	0.0666576	0.0252491	0.358067	0.0996248	0.138137	0.416826	0.251491	0.236991	0.511336	0.286389	0.343484
0.167686	0.0668282	0.0325846	0.29974	0.0820679	0.0965793	0.685945	0.305575	0.563896	0.849373	0.289048	0.804983
0.12521	0.0656046	0.0199816	0.24846	0.0690458	0.0664998	0.200308	0.13158	0.0574366	0.39627	0.240269	0.214759
0.174369	0.0652873	0.0346671	0.42963	0.0991206	0.194407	0.270608	0.126906	0.0893339	0.58559	0.235378	0.398318
0.182113	0.0701074	0.03808	0.372512	0.0800831	0.145178	0.685197	0.319726	0.57172	0.772903	0.330264	0.706453
0.195645	0.0646643	0.0424583	0.45443	0.100585	0.216624	0.301424	0.14127	0.110814	0.360963	0.202996	0.171502
0.153074	0.0664118	0.0278422	0.316015	0.0686165	0.104573	0.31801	0.134135	0.119122	0.690361	0.269497	0.549227
0.177653	0.0689358	0.0363129	0.256304	0.0705806	0.0706736	0.643929	0.329885	0.523469	0.771086	0.296537	0.682508
0.185712	0.0676514	0.0390656	0.332066	0.0906298	0.118482	0.26796	0.177009	0.103135	0.54604	0.275074	0.373825
0.144936	0.069787	0.0258766	0.345161	0.0812901	0.125744	0.484184	0.252399	0.298139	0.696369	0.289097	0.568507
0.134466	0.0642177	0.0222052	0.23407	0.0684545	0.0594746	0.623232	0.322624	0.492504	0.798175	0.277782	0.714246
0.18112	0.0693258	0.0376105	0.368412	0.0814238	0.142357	0.250884	0.14603	0.0842677	0.54067	0.240843	0.350329
0.153759	0.0684991	0.0283339	0.314615	0.0818044	0.105674	0.195248	0.114738	0.0512865	0.532885	0.257944	0.350501
0.1836	0.0650124	0.0379357	0.227455	0.0686174	0.0564441	0.18491	0.142078	0.0543779	0.54383	0.255416	0.360988
0.160583	0.0676088	0.0303578	0.32571	0.0839271	0.11313	0.115565	0.0929796	0.0220004	0.37088	0.266826	0.208748
0.170505	0.0677229	0.0336585	0.30375	0.0678714	0.0968705	0.321416	0.122856	0.118402	0.624337	0.260489	0.457652
0.125747	0.0644948	0.0199718	0.344653	0.0892966	0.12676	0.632262	0.281361	0.47892	0.755063	0.28146	0.64934
0.132544	0.0695579	0.0224063	0.239897	0.0664153	0.0619614	0.55537	0.30673	0.402519	0.693809	0.288395	0.564543
0.158771	0.0698049	0.030081	0.319725	0.0902942	0.110377	0.0952112	0.0865662	0.0165589	0.345053	0.187028	0.154041
0.227474	0.0673489	0.0562802	0.317447	0.0686649	0.105488	0.399908	0.254464	0.224678	0.589324	0.27579	0.423363
0.226144	0.0698287	0.0560172	0.360011	0.081853	0.136308	0.223672	0.11513	0.0632841	0.377425	0.232847	0.196668
0.216402	0.0653518	0.0511007	0.406769	0.0890059	0.173383	0.173099	0.133373	0.0477519	0.366053	0.179763	0.16631
0.165113	0.0683892	0.0319394	0.296642	0.0814873	0.0946368	0.534279	0.30351	0.377572	0.616206	0.310413	0.476066
0.147942	0.0659905	0.0262415	0.314192	0.0700654	0.103626	0.430711	0.240374	0.243292	0.83881	0.269416	0.776187
0.178774	0.0675411	0.0365218	0.317206	0.080407	0.107085	0.108017	0.0972971	0.0211345	0.247459	0.199453	0.101018
0.200024	0.0666545	0.0444524	0.294373	0.0856	0.0939829	0.38349	0.260285	0.214813	0.649492	0.296988	0.510042
0.16841	0.0664265	0.0327743	0.357876	0.0807699	0.134599	0.184748	0.120049	0.0485436	0.64554	0.213199	0.462175
0.150266	0.0660009	0.026936	0.296211	0.0662429	0.0921289	0.433486	0.260689	0.255869	0.628283	0.291322	0.479608
0.178003	0.066456	0.0361015	0.329684	0.0809853	0.11525	0.409555	0.253392	0.231943	0.650474	0.263114	0.492345
0.217178	0.0698931	0.0520515	0.275771	0.0682349	0.0807057	0.469619	0.251537	0.283813	0.683372	0.287838	0.549848
0.129999	0.0670872	0.0214005	0.276905	0.0687003	0.081396	0.617628	0.284549	0.462432	0.710593	0.273487	0.579738
0.176827	0.0706335	0.036257	0.22922	0.0664681	0.05696	0.497133	0.313508	0.345428	0.59301	0.307086	0.445963
0.176215	0.0664939	0.0354731	0.248705	0.0679439	0.0664707	0.375604	0.261164	0.209285	0.73869	0.263372	0.615028
0.220059	0.0659751	0.0527788	0.343153	0.0911615	0.126064	0.390908	0.267087	0.224144	0.52717	0.280585	0.356635
0.131336	0.0693514	0.0220587	0.249606	0.0706577	0.0672956	0.556063	0.289373	0.392943	0.590487	0.303957	0.441064
0.0697789	0.0670166	0.00936032	0.250555	0.0668487	0.0672465	0.616037	0.316977	0.479977	0.766131	0.280961	0.665895
0.175086	0.066126	0.0350279	0.393092	0.0984378	0.164211	0.607052	0.279258	0.446497	0.653191	0.310423	0.523021
0.165701	0.0691917	0.0322442	0.287776	0.0689124	0.087564	0.547017	0.294046	0.385691	0.71267	0.309208	0.603509
0.176507	0.0668037	0.0356176	0.395363	0.089723	0.164362	0.522618	0.317482	0.373924	0.716538	0.302576	0.604979
0.113644	0.0676829	0.0174959	0.230344	0.0698377	0.0579355	0.365623	0.281602	0.21298	0.580689	0.32847	0.445093
0.160783	0.0680749	0.0304853	0.277873	0.0707685	0.0822215	0.326028	0.132197	0.12377	0.417233	0.226723	0.225486
0.16421	0.0703992	0.0319208	0.304878	0.0815098	0.0995942	0.606071	0.337374	0.481143	0.787834	0.280176	0.699181
0.165567	0.0657893	0.0317407	0.419244	0.107401	0.1873	0.212489	0.139597	0.0646387	0.476285	0.211111	0.271415
0.197659	0.0653041	0.0433337	0.439896	0.106666	0.204886	0.256087	0.17441	0.0959995	0.572892	0.240754	0.386168
0.235724	0.0675051	0.0601226	0.440117	0.0893233	0.201682	0.215402	0.154544	0.0702819	0.636358	0.267757	0.476645
0.139927	0.0671459	0.0240882	0.296322	0.0680827	0.0924423	0.223322	0.094859	0.058871	0.370369	0.228751	0.189501
0.23659	0.066869	0.0604463	0.302774	0.070267	0.0966095	0.458383	0.25421	0.274737	0.847336	0.26848	0.79006
0.208334	0.0696435	0.0482531	0.358117	0.0698081	0.133121	0.317693	0.295389	0.188183	0.434524	0.301846	0.279922
0.161622	0.0679675	0.0307412	0.28701	0.079655	0.0887196	0.467271	0.264246	0.288168	0.972074	0.267853	1.01667
0.118338	0.0641514	0.0181193	0.345075	0.0915239	0.127453	0.367237	0.190499	0.171153	0.681665	0.247169	0.52576
0.174085	0.064411	0.0344544	0.252449	0.0680226	0.0683574	0.498958	0.234615	0.304003	0.662846	0.264188	0.50916
0.166871	0.0675702	0.0324117	0.330069	0.0716284	0.114076	0.400416	0.268275	0.232305	0.474487	0.297177	0.313452
0.121782	0.0690515	0.019599	0.304949	0.0827955	0.0998488	0.622243	0.274208	0.462377	0.780806	0.242662	0.668542
0.208096	0.0679796	0.0479252	0.361725	0.069316	0.13565	0.360024	0.279186	0.207562	0.533192	0.271565	0.358041
0.178725	0.0685699	0.0366443	0.297452	0.0806496	0.0949818	0.373557	0.267546	0.211126	0.34825	0.304811	0.214188
0.128326	0.0701618	0.0213902	0.301077	0.0689443	0.0954005	0.598869	0.290637	0.443114	0.711323	0.256771	0.571911
0.130006	0.0657942	0.0212303	0.241092	0.068441	0.0628097	0.404882	0.262242	0.2327	0.673408	0.281681	0.532822
0.155667	0.0671106	0.0287361	0.199052	0.066708	0.0440716	0.215346	0.129081	0.0630356	0.535797	0.237552	0.34351
0.199607	0.0673894	0.0443842	0.25782	0.071837	0.0716315	0.795447	0.26853	0.704844	1.04979	0.280071	1.1805
0.193703	0.0657216	0.0418402	0.274585	0.0701376	0.0803162	0.563271	0.28111	0.396297	0.645384	0.264836	0.486659
0.186956	0.0678107	0.0395508	0.331191	0.0910788	0.117983	0.361204	0.262091	0.19916	0.607569	0.272835	0.443578
0.185153	0.0647387	0.0384727	0.298394	0.0687133	0.0937607	0.566907	0.283733	0.401888	0.724532	0.294073	0.611426
0.171982	0.0687247	0.0343009	0.19524	0.0690072	0.0428806	0.180831	0.150242	0.0552726	0.250697	0.216137	0.109564
0.183526	0.0670921	0.0381833	0.24459	0.0700478	0.0647311	0.411867	0.176966	0.200951	0.805804	0.280978	0.728268
0.194933	0.067832	0.0426002	0.280287	0.0798767	0.0849408	0.112384	0.0976273	0.0221612	0.486439	0.250649	0.299447
0.134124	0.0672604	0.0225133	0.224763	0.0681169	0.0551585	0.641259	0.317552	0.512052	0.744348	0.299679	0.643861
0.181841	0.0685436	0.0377645	0.353706	0.094665	0.134069	0.524359	0.257981	0.341506	0.842409	0.264596	0.779664
0.170353	0.066863	0.0334908	0.252967	0.070007	0.0688934	0.66898	0.282668	0.527436	0.78865	0.2678	0.693685
0.204703	0.0679424	0.0465193	0.32389	0.0842347	0.112	0.304229	0.291427	0.177485	0.481283	0.294408	0.31831
0.167246	0.0686903	0.0326897	0.35796	0.0799093	0.134521	0.20656	0.161859	0.0688655	0.451651	0.220977	0.252819
0.208049	0.0676405	0.0478595	0.325808	0.0806517	0.112656	0.452286	0.271064	0.278038	0.621987	0.30087	0.477391
0.238041	0.0682058	0.0613157	0.359924	0.0834643	0.136512	0.352949	0.284044	0.205254	0.522407	0.284995	0.354131
0.181579	0.0669391	0.0374519	0.352045	0.0803612	0.130394	0.323072	0.280527	0.18307	0.415138	0.289672	0.25625
0.175117	0.0688616	0.035408	0.286446	0.0800729	0.0884631	0.557571	0.228454	0.363076	0.86907	0.27825	0.832706
0.196183	0.0662532	0.0428774	0.272838	0.0718801	0.0796075	0.591316	0.297247	0.438011	0.751199	0.291322	0.649168
0.202504	0.0666313	0.0454475	0.433168	0.0994913	0.197533	0.645216	0.313202	0.514398	0.845695	0.277675	0.792304
0.13916	0.0696175	0.024212	0.286828	0.0814361	0.0889024	0.24928	0.110503	0.0743515	0.682324	0.239676	0.523011
0.171597	0.0661838	0.0338259	0.223511	0.0707112	0.0549572	0.741303	0.317238	0.65017	0.894436	0.274509	0.875372
0.125912	0.0702905	0.0207947	0.264881	0.0810759	0.0767353	0.173313	0.147313	0.0517387	0.341315	0.236955	0.172643
0.218379	0.0681808	0.0523379	0.317375	0.0694093	0.105545	0.347183	0.135219	0.13882	0.737397	0.277372	0.620689
0.164521	0.0655022	0.0313576	0.360097	0.0944913	0.138599	0.496309	0.264615	0.316343	0.583261	0.270904	0.413582
0.14911	0.0667829	0.0266939	0.424661	0.0926157	0.188915	0.454583	0.343023	0.324311	0.698362	0.327912	0.595235
0.222252	0.0679346	0.0540109	0.309731	0.0691309	0.100712	0.355214	0.197987	0.165376	0.916163	0.279734	0.917605
0.207599	0.0685508	0.0477967	0.355232	0.0736429	0.131613	0.259604	0.154503	0.0912655	0.53322	0.239409	0.34164
0.190827	0.067775	0.0410083	0.355543	0.0816821	0.133083	0.181863	0.120005	0.0474753	0.670479	0.227956	0.501506
0.192692	0.0659762	0.0414829	0.3623	0.0815596	0.137914	0.69168	0.303369	0.570454	0.712088	0.291503	0.592043
0.145856	0.0683761	0.0259492	0.399136	0.0884795	0.167138	0.503805	0.25536	0.319028	0.644238	0.25477	0.47995
0.211832	0.0664604	0.0492896	0.270779	0.0694985	0.0781513	0.372083	0.264535	0.208424	0.490402	0.274496	0.315842
0.203977	0.0668182	0.0460713	0.308572	0.0802899	0.101663	0.668297	0.260174	0.514312	0.913597	0.284725	0.915729
0.15647	0.0664629	0.0289002	0.33672	0.0815872	0.120037	0.56262	0.29896	0.405919	0.687248	0.288419	0.555496
0.228404	0.0704427	0.0571304	0.324746	0.0672785	0.109987	0.549104	0.289083	0.385084	0.806738	0.264793	0.720941
0.165565	0.0655331	0.0317065	0.310066	0.0681867	0.10079	0.510671	0.323219	0.365255	0.615631	0.318831	0.480654
0.236146	0.0662897	0.0601593	0.388794	0.0813254	0.157775	0.388446	0.275507	0.226794	0.44534	0.286916	0.280649
0.2234	0.0672622	0.054432	0.451584	0.0901741	0.212059	0.374161	0.271121	0.213503	0.681352	0.282433	0.544008
0.172285	0.0679483	0.034299	0.46187	0.0987489	0.223075	0.406277	0.260033	0.232678	0.827127	0.283758	0.764657
0.200302	0.0682575	0.0447799	0.268525	0.0826536	0.0789374	0.558798	0.296142	0.399955	0.707571	0.312601	0.598376
0.209095	0.0705146	0.0486929	0.271204	0.0827508	0.0803993	0.305639	0.16461	0.120512	0.502265	0.250072	0.314806
0.183704	0.0697183	0.0386076	0.365927	0.0905579	0.142104	0.541312	0.290711	0.377532	0.691819	0.268225	0.550559
0.183516	0.0673536	0.0382146	0.369058	0.0914698	0.14457	0.66728	0.298937	0.534626	0.639562	0.308209	0.504032
0.18268	0.0679723	0.0379923	0.327497	0.0816839	0.113927	0.408042	0.136317	0.185081	0.804337	0.259009	0.714043
0.215678	0.0658998	0.0508596	0.32613	0.0675178	0.110919	0.216228	0.154903	0.0707496	0.471616	0.258424	0.289205
0.17061	0.068623	0.033817	0.315696	0.0817969	0.106355	0.132049	0.117801	0.031314	0.325257	0.246144	0.166379
0.178749	0.0690863	0.0367241	0.292106	0.0799991	0.0917256	0.664539	0.313668	0.54	0.748025	0.29959	0.649296
0.150259	0.0693157	0.0273824	0.311248	0.0817254	0.103554	0.66052	0.328534	0.544221	0.684701	0.341967	0.585757
0.140837	0.0641806	0.0239541	0.227097	0.0681575	0.0562183	0.186928	0.146018	0.0562635	0.480343	0.253413	0.294947
0.068405	0.0685269	0.00937519	0.27306	0.0694328	0.0793828	0.673709	0.338177	0.568248	0.787312	0.327387	0.727043
0.161234	0.067264	0.0305208	0.318018	0.0805975	0.107631	0.339813	0.279128	0.193386	0.557736	0.287023	0.393451
0.172784	0.0733951	0.035241	0.264182	0.0705222	0.0747655	0.434709	0.243733	0.248377	0.755968	0.252842	0.635417
0.185136	0.0668796	0.0387482	0.327781	0.08071	0.113954	0.154336	0.159358	0.0492148	0.368782	0.259315	0.203244
0.153155	0.0674463	0.0280055	0.323241	0.0911818	0.112799	0.511773	0.260164	0.329598	0.889409	0.280651	0.869812
0.167451	0.0680875	0.0326756	0.395937	0.092092	0.165247	0.593022	0.283297	0.431932	0.786489	0.298647	0.707755
0.141435	0.065992	0.0243587	0.27573	0.0712254	0.0811002	0.320748	0.270367	0.175977	0.63478	0.25194	0.46642
0.179212	0.0649702	0.036338	0.221968	0.0696908	0.0541265	0.706641	0.321467	0.602682	0.804571	0.291245	0.732158
0.211321	0.0678599	0.0492615	0.308217	0.0822281	0.101759	0.186526	0.137743	0.0537652	0.405756	0.239167	0.221838
0.140751	0.067675	0.0243906	0.256538	0.0792364	0.0720902	0.131142	0.11441	0.0302879	0.419692	0.214195	0.222021
0.206111	0.0668417	0.0469494	0.38278	0.0897966	0.154584	0.384993	0.264175	0.218008	0.744262	0.262788	0.622984
0.249955	0.0674642	0.0670288	0.438013	0.0911245	0.200159	0.535044	0.257211	0.35243	1.01982	0.286129	1.12189
0.22132	0.0682419	0.0536394	0.456629	0.106745	0.219905	0.427752	0.270754	0.25628	0.653819	0.255583	0.492803
0.133186	0.0687819	0.0224695	0.238102	0.065466	0.0609785	0.610264	0.287258	0.454939	0.718264	0.276757	0.592497
0.167235	0.0651657	0.032214	0.251654	0.0687325	0.0680539	0.400364	0.273052	0.234849	0.67526	0.286942	0.538312
0.17334	0.0692989	0.0348492	0.211468	0.067613	0.0492902	0.565056	0.251495	0.382537	0.550176	0.303554	0.394839
0.172509	0.0700075	0.0346605	0.316025	0.0810344	0.106439	0.468237	0.247236	0.280372	0.825231	0.278832	0.758754
0.163168	0.0684586	0.0313105	0.361259	0.0896837	0.138551	0.216138	0.103735	0.0574763	0.812725	0.2759	0.736642
0.162967	0.0682693	0.0312189	0.336299	0.0797809	0.119462	0.681068	0.298517	0.552965	0.81366	0.282521	0.74186
0.130035	0.0688104	0.0216439	0.26375	0.0797385	0.0759223	0.208602	0.116067	0.0569865	0.363123	0.264328	0.201728
0.216804	0.0664568	0.0514205	0.353376	0.0882505	0.132663	0.596156	0.342024	0.472383	0.703673	0.32101	0.598203
0.186915	0.067718	0.0395231	0.343576	0.0723617	0.123281	0.145927	0.0860666	0.0287022	0.24075	0.164777	0.085112
0.142331	0.0660551	0.0246213	0.316488	0.0799326	0.106554	0.457263	0.326483	0.315681	0.542436	0.311619	0.391343
0.196719	0.0672298	0.0432182	0.318607	0.0822374	0.108274	0.522988	0.30861	0.368756	0.6902	0.31136	0.573321
0.162913	0.0657233	0.0308601	0.247792	0.0663514	0.0658032	0.570466	0.292287	0.410863	0.576061	0.292934	0.417657
0.178564	0.0684106	0.036565	0.294131	0.0827205	0.0933556	0.174943	0.120614	0.0451527	0.491305	0.261768	0.309903
0.211732	0.0642393	0.048957	0.357378	0.0786185	0.1339	0.360387	0.277012	0.206615	0.496475	0.281535	0.325749
0.190388	0.0696578	0.0410999	0.292577	0.0675143	0.0901593	0.33873	0.261633	0.18319	0.772986	0.283808	0.678055
0.20587	0.0688002	0.0471161	0.392222	0.10145	0.164131	0.465786	0.251604	0.280261	0.720322	0.251341	0.582036
0.165808	0.0675175	0.0320508	0.369421	0.0897753	0.144531	0.10109	0.145081	0.0312676	0.263308	0.170577	0.098428
0.214571	0.0713176	0.051127	0.293465	0.0721926	0.0913336	0.401945	0.159157	0.186891	0.336985	0.24807	0.175097
0.152596	0.0681087	0.0279242	0.245075	0.0716876	0.0652009	0.302855	0.27819	0.169111	0.570451	0.255722	0.390808
0.179838	0.0674224	0.0368876	0.349088	0.0828549	0.128727	0.184579	0.151237	0.0569421	0.504525	0.244132	0.314146
0.182767	0.0663403	0.037805	0.299554	0.0697141	0.0945925	0.40537	0.261682	0.232802	0.518464	0.281817	0.348226
0.134148	0.0677985	0.0225923	0.328612	0.0707796	0.112996	0.687237	0.309882	0.568322	0.603188	0.343753	0.482002
0.174695	0.0676544	0.0350956	0.361779	0.0809005	0.137429	0.553649	0.274696	0.381985	0.678817	0.31051	0.557209
0.15842	0.0695588	0.0299354	0.235854	0.0706866	0.0606239	0.414519	0.148186	0.193785	0.922267	0.253607	0.914893
0.120128	0.0673788	0.0189706	0.279357	0.0809503	0.0845934	0.277177	0.284176	0.157583	0.54407	0.252369	0.359703
0.187324	0.0680496	0.0397211	0.317938	0.0810983	0.107662	0.353943	0.267076	0.196605	0.534226	0.280611	0.364139
0.181192	0.0671336	0.0373376	0.379146	0.0919012	0.152197	0.324885	0.280851	0.184428	0.578871	0.29982	0.424984
0.153541	0.0662993	0.0279705	0.306955	0.082316	0.100998	0.309926	0.305462	0.189361	0.498579	0.291275	0.333422
0.173237	0.067608	0.034582	0.349718	0.0691821	0.127089	0.428747	0.270232	0.25685	0.509426	0.244018	0.31906
0.149796	0.0665118	0.0268625	0.24171	0.0713711	0.0635174	0.407964	0.263159	0.235687	0.561082	0.268973	0.38716
0.139772	0.0708699	0.0245588	0.332233	0.0906898	0.118603	0.18684	0.139449	0.0543553	0.485527	0.232427	0.289759
0.121715	0.0654445	0.0190974	0.274291	0.0683353	0.0799052	0.47991	0.3176	0.331183	0.590393	0.313622	0.446923
0.117498	0.0681864	0.0184553	0.305507	0.0795192	0.0996579	0.463877	0.261049	0.283328	0.615314	0.294443	0.465308
0.176301	0.0657616	0.0354067	0.327052	0.0819838	0.113685	0.127335	0.118768	0.0303199	0.521108	0.268897	0.34386
0.197058	0.0693427	0.0436403	0.400754	0.0920437	0.169076	0.532131	0.32062	0.385961	0.725041	0.293559	0.611862
0.146509	0.0665402	0.0258924	0.284327	0.0709201	0.0858716	0.218289	0.114803	0.0608301	0.389929	0.180211	0.184521
0.166524	0.0664148	0.0321411	0.281191	0.0880027	0.0868127	0.264613	0.163243	0.0966685	0.47507	0.222732	0.275301
0.203064	0.0685772	0.0459378	0.323662	0.0818506	0.111456	0.442681	0.253665	0.260312	0.730021	0.267639	0.604561
0.244883	0.0674651	0.0645194	0.301039	0.078936	0.0968554	0.398963	0.255725	0.224567	0.581473	0.25382	0.402535
0.191354	0.0659919	0.0409714	0.307648	0.0835148	0.101622	0.52257	0.233058	0.327395	0.92675	0.225809	0.909856
0.178221	0.0684509	0.0364483	0.378789	0.100845	0.153651	0.379979	0.289608	0.228257	0.585206	0.290186	0.426674
0.195924	0.06748	0.0429398	0.300489	0.0699105	0.0951814	0.345894	0.295431	0.206922	0.61572	0.294849	0.466047
0.135447	0.0667552	0.0228021	0.261922	0.0812666	0.0752075	0.247572	0.287681	0.144052	0.574025	0.314806	0.428607
0.138861	0.0672847	0.0238097	0.305393	0.0691249	0.0980434	0.186137	0.0933252	0.0433567	0.247591	0.197953	0.100487
0.143289	0.0651304	0.0247737	0.387737	0.0896202	0.158372	0.265477	0.152315	0.0936778	0.567819	0.264985	0.392636
0.141155	0.0665509	0.0243537	0.238545	0.0689155	0.0616529	0.159962	0.0968821	0.0349739	0.200208	0.159002	0.0653651
0.186807	0.0665552	0.0393265	0.278508	0.0696465	0.0824173	0.168469	0.123843	0.043719	0.603497	0.266485	0.435223
0.207991	0.0669282	0.0477396	0.257479	0.0708582	0.0713165	0.404093	0.273244	0.237954	0.896881	0.262571	0.87334
0.172147	0.0683164	0.0343018	0.282839	0.0813587	0.0866173	0.219744	0.152848	0.07165	0.468732	0.206753	0.262456
0.245631	0.0677715	0.0649274	0.304674	0.0911589	0.101136	0.29361	0.134694	0.104349	0.500578	0.25937	0.317851
0.181921	0.0665285	0.0375212	0.33467	0.0840096	0.119062	0.463654	0.243407	0.274222	0.788678	0.287881	0.704889
0.204599	0.0680034	0.0464851	0.449809	0.0900282	0.210434	0.360619	0.159185	0.155386	0.356274	0.256288	0.192615
0.168832	0.0695455	0.033341	0.287296	0.0831516	0.0894534	0.536851	0.311808	0.385433	0.601711	0.310808	0.458658
0.160293	0.068476	0.0303828	0.40989	0.0879755	0.175749	0.244514	0.120422	0.0742885	0.385451	0.22942	0.201206
0.230208	0.0672751	0.0575215	0.313192	0.0671747	0.102602	0.603076	0.304803	0.456605	0.90927	0.272037	0.900777
0.12084	0.0650984	0.01884	0.240875	0.0703925	0.0629758	0.264951	0.147572	0.0919766	0.389534	0.234633	0.206789
0.171838	0.0679348	0.0341433	0.310297	0.0813783	0.102907	0.520582	0.308566	0.366219	0.675035	0.275689	0.531676
0.20051	0.0673968	0.0447464	0.354618	0.0892252	0.133715	0.22093	0.130842	0.0659294	0.464161	0.23939	0.272753
0.198444	0.0668049	0.0438429	0.353748	0.0810605	0.131708	0.467459	0.256679	0.284402	0.767097	0.250645	0.65126
0.170671	0.0716117	0.034257	0.330078	0.080002	0.115352	0.410034	0.259459	0.235447	0.756403	0.250106	0.634698
0.162153	0.0711828	0.0313605	0.322468	0.079919	0.110372	0.668365	0.297642	0.535303	0.872124	0.275857	0.836697
0.126289	0.0700469	0.0208554	0.351598	0.0807942	0.130149	0.392096	0.277178	0.230567	0.502923	0.310488	0.349334
0.142771	0.068438	0.0250673	0.336954	0.0919724	0.121997	0.170361	0.160899	0.0549115	0.484232	0.232929	0.288736
0.219126	0.0687363	0.052741	0.602062	0.120355	0.376964	0.346773	0.269803	0.193045	0.51635	0.26035	0.334399
0.07641	0.0654422	0.0101212	0.27415	0.0809964	0.0817189	0.237569	0.112239	0.0690365	0.378277	0.209171	0.186846
0.122671	0.0654501	0.0193319	0.332143	0.0707691	0.115327	0.279901	0.1578	0.103246	0.764638	0.260919	0.652751
0.111143	0.0672525	0.0168756	0.246687	0.06867	0.06557	0.275694	0.152461	0.0992512	0.770733	0.255597	0.65936
0.14523	0.0641019	0.0252007	0.217879	0.0702007	0.0523993	0.533724	0.308115	0.379796	0.806696	0.264137	0.720528
0.18303	0.0703523	0.0384494	0.30859	0.0670014	0.0997172	0.551103	0.311098	0.400496	0.741876	0.28557	0.63193
0.194483	0.0701398	0.0427431	0.322324	0.082264	0.11066	0.649499	0.309697	0.517761	0.750451	0.299732	0.653016
0.156511	0.0640844	0.0286024	0.36897	0.0982925	0.1458	0.207683	0.145501	0.064303	0.357153	0.21562	0.17405
0.168141	0.0666405	0.0327122	0.231913	0.0682779	0.0584456	0.209464	0.147679	0.0656842	0.548385	0.252467	0.364466
0.185701	0.0689941	0.0392449	0.307325	0.0679557	0.0990666	0.173053	0.12923	0.0466477	0.467459	0.234867	0.273681
0.213214	0.0699635	0.050355	0.282447	0.0679734	0.0843965	0.146108	0.10237	0.0318272	0.416734	0.192219	0.210615
0.210979	0.0684268	0.0491943	0.339038	0.0828463	0.121811	0.165803	0.125741	0.0433015	0.618532	0.246861	0.443521
0.185197	0.0692826	0.0390979	0.278234	0.0702235	0.0823456	0.362852	0.276894	0.208332	0.625972	0.27219	0.465928
0.214427	0.0648898	0.0501898	0.262453	0.0695705	0.0737215	0.274097	0.133823	0.0930375	0.760231	0.253122	0.642021
0.226137	0.0675953	0.0557069	0.380001	0.0893238	0.152379	0.695701	0.315433	0.583498	0.756546	0.308803	0.667721
0.170148	0.0695292	0.0337847	0.268023	0.0700938	0.0767496	0.315051	0.147666	0.121063	0.478522	0.237994	0.285624
0.197128	0.0644079	0.0430078	0.263776	0.0710945	0.0746323	0.451532	0.250397	0.26658	0.904833	0.267399	0.890226
0.199996	0.0659894	0.0443532	0.350762	0.0808349	0.129568	0.583858	0.307902	0.435693	0.74363	0.282071	0.63255
0.157325	0.0675886	0.0293193	0.288407	0.0831261	0.0900886	0.272734	0.166428	0.102082	1.02614	0.29231	1.1384
0.168187	0.0685652	0.032988	0.1914	0.068393	0.0413115	0.443028	0.257942	0.262808	0.527731	0.293519	0.364654
0.230562	0.0644256	0.0573096	0.340596	0.088981	0.123923	0.479506	0.257629	0.296299	0.724014	0.310379	0.620532
0.158356	0.0702066	0.0300057	0.331951	0.090332	0.118351	0.464592	0.251259	0.278977	0.800056	0.29117	0.72487
0.149583	0.0715707	0.0274974	0.422526	0.101597	0.188851	0.300981	0.283608	0.171023	0.438639	0.29467	0.279235
0.177424	0.0658885	0.0358204	0.329274	0.0739866	0.113895	0.659293	0.272131	0.508723	0.734321	0.297028	0.627453
0.201299	0.0688664	0.0452638	0.389785	0.0791939	0.158204	0.67943	0.29807	0.550471	0.797398	0.290553	0.720265
0.198977	0.0682085	0.0442444	0.349075	0.0676988	0.126436	0.580356	0.292177	0.42218	0.751209	0.303307	0.65631
0.199435	0.0650328	0.0440037	0.355696	0.0925792	0.13509	0.486122	0.250002	0.298816	0.575906	0.268419	0.403717
0.204296	0.0700931	0.0466499	0.286545	0.0795526	0.0884367	0.32567	0.135155	0.124328	0.694489	0.276061	0.558524
0.171886	0.0682802	0.0342071	0.246793	0.0698886	0.0657914	0.324467	0.282524	0.185099	0.381257	0.31711	0.245916
0.190208	0.0665093	0.0406025	0.228842	0.0700281	0.0572727	0.315217	0.166277	0.12701	0.796675	0.294681	0.721528
0.203181	0.0675927	0.0458512	0.407725	0.099377	0.176115	0.319156	0.292165	0.187221	0.551015	0.290601	0.388067
0.156862	0.0696467	0.0294563	0.233566	0.0686008	0.059259	0.42099	0.338483	0.291803	0.666773	0.298766	0.533847
0.138974	0.0685658	0.0240151	0.279213	0.0712445	0.0830355	0.246907	0.0933157	0.0696707	0.572722	0.188487	0.363538
0.193476	0.0685338	0.0421299	0.2981	0.0817309	0.0955435	0.387477	0.258426	0.216923	0.656899	0.281499	0.510758
0.18942	0.0665368	0.040307	0.371642	0.0906433	0.146334	0.615673	0.328605	0.487034	0.596629	0.333031	0.466876
0.205142	0.0660327	0.0464434	0.493403	0.0979434	0.25304	0.175852	0.11761	0.0447561	0.416802	0.217896	0.221202
0.161467	0.0675826	0.030639	0.339569	0.0807045	0.12182	0.836922	0.289889	0.784474	0.929602	0.260304	0.931918
0.188054	0.067119	0.0398693	0.254923	0.0703629	0.0699367	0.67307	0.299042	0.54245	0.774527	0.28387	0.680475
0.204395	0.0708433	0.0467961	0.350317	0.081785	0.129411	0.639612	0.289282	0.492787	1.02341	0.265213	1.11771
0.205413	0.0658368	0.0465289	0.367959	0.0797183	0.141749	0.495114	0.265185	0.315461	0.642146	0.290787	0.496909
0.187929	0.0672182	0.0398358	0.436979	0.0978623	0.200528	0.623432	0.293079	0.474563	0.854793	0.268039	0.802516
0.221955	0.068422	0.0539457	0.373863	0.0784658	0.145931	0.596596	0.289497	0.439735	0.726483	0.298758	0.617034
0.178803	0.0699107	0.0368579	0.311427	0.0821481	0.103735	0.455488	0.248078	0.269012	0.865604	0.291071	0.833992
0.188976	0.0683359	0.0403817	0.346859	0.0906359	0.128526	0.242429	0.151746	0.0817987	0.548362	0.26931	0.373229
0.195881	0.0698835	0.0432532	0.272171	0.0837155	0.0810853	0.606701	0.292791	0.453813	0.764393	0.283443	0.664636
0.173072	0.0684686	0.0346419	0.359531	0.0807531	0.135784	0.548195	0.237764	0.35705	0.674558	0.261373	0.523344
0.147211	0.0673731	0.0262102	0.312952	0.0682487	0.102597	0.138578	0.163149	0.0458218	0.380165	0.251311	0.207683
0.211227	0.0686477	0.0493294	0.298739	0.06688	0.0937176	0.247822	0.136488	0.0800449	0.77576	0.24284	0.660775
0.170024	0.0673171	0.0334396	0.290092	0.0806479	0.0906577	0.610531	0.283507	0.453124	0.801805	0.275269	0.718665
0.205632	0.0652806	0.0465463	0.390214	0.0990142	0.162071	0.13845	0.0885212	0.0270043	0.225216	0.198477	0.0901153
0.144176	0.0629322	0.0247472	0.34273	0.0914011	0.125818	0.150338	0.155773	0.0468668	0.383772	0.231193	0.200731
0.209354	0.0637023	0.0478871	0.395155	0.0789659	0.162383	0.203143	0.11906	0.0554424	0.50246	0.227921	0.304414
0.276611	0.0653874	0.0807892	0.347952	0.0832386	0.127999	0.388986	0.256595	0.217151	0.557774	0.30317	0.403023
0.208953	0.0688365	0.0483999	0.289426	0.0823298	0.0905458	0.492382	0.248438	0.304161	0.669553	0.268406	0.520343
0.178764	0.0660875	0.0363243	0.259603	0.0702475	0.0723283	0.325468	0.144197	0.126722	0.319703	0.169681	0.131001
0.223301	0.0689855	0.0546222	0.321642	0.0823334	0.110232	0.484196	0.261953	0.303065	0.756969	0.297804	0.661689
0.178243	0.0683691	0.0364448	0.330838	0.0808889	0.115997	0.518951	0.311775	0.366513	0.645861	0.284819	0.498258
0.192543	0.070446	0.0420355	0.264952	0.0799333	0.0765887	0.170516	0.132769	0.0467033	0.348852	0.224148	0.17194
0.122623	0.0704345	0.0199973	0.296669	0.0826598	0.0948453	0.420513	0.280062	0.255266	0.567021	0.310666	0.418026
0.110378	0.068772	0.0169129	0.348601	0.0898013	0.129587	0.537385	0.234636	0.343837	0.624602	0.27407	0.465242
0.217452	0.0666344	0.0517253	0.280079	0.0685421	0.0831422	0.0719303	0.123857	0.0205145	0.101594	0.216899	0.0573665
0.0932995	0.0705132	0.0136769	0.391063	0.089511	0.160943	0.48253	0.322447	0.336807	0.656226	0.305004	0.52366
0.157528	0.0654673	0.029101	0.298629	0.0673653	0.0937171	0.285452	0.13828	0.100604	0.794249	0.309035	0.726334
0.182467	0.069211	0.0380845	0.28165	0.0705641	0.0843058	0.599988	0.285745	0.441636	0.879757	0.27378	0.848928
0.153502	0.0678821	0.0281708	0.295588	0.0825729	0.0941904	0.138882	0.140629	0.0390648	0.397124	0.212986	0.20307
0.158029	0.0688406	0.0297122	0.251078	0.0685935	0.0677454	0.0673798	0.119045	0.0187117	0.388797	0.255046	0.216211
0.135762	0.0705944	0.023415	0.261361	0.0824861	0.0751134	0.399727	0.260041	0.227403	0.484457	0.281963	0.314202
0.186724	0.0717986	0.0400209	0.316034	0.0802473	0.106317	0.34787	0.284093	0.201722	0.735984	0.284243	0.622466
0.121223	0.0664469	0.0191102	0.318364	0.0794609	0.10767	0.396545	0.271083	0.230734	0.695001	0.251576	0.546317
0.183154	0.0706283	0.0385336	0.323178	0.0838569	0.111476	0.604265	0.278015	0.442428	0.866396	0.269392	0.823215
0.166927	0.0639342	0.0319521	0.279336	0.0681602	0.0826745	0.183438	0.139484	0.0531051	0.644039	0.293698	0.501045
0.14919	0.0671155	0.0267622	0.419238	0.0923778	0.184294	0.437275	0.258735	0.258153	0.810605	0.274622	0.732498
0.1629	0.0692289	0.0313291	0.277906	0.0811924	0.0838242	0.493936	0.317922	0.345047	0.619472	0.302719	0.475385
0.159494	0.0666735	0.0298836	0.291546	0.0719378	0.0901742	0.246066	0.0887172	0.068419	0.505914	0.215712	0.302481
0.189349	0.0673488	0.040389	0.292594	0.0712041	0.0906813	0.262166	0.170631	0.0978459	0.426028	0.256741	0.247416
0.187201	0.069337	0.0398519	0.266991	0.0797366	0.0776422	0.35022	0.274486	0.197996	0.491453	0.304224	0.334079
0.140151	0.0668735	0.0241143	0.335822	0.0915794	0.121163	0.674419	0.310729	0.551394	0.849877	0.267341	0.793762
0.194252	0.0693045	0.042537	0.300047	0.0707738	0.0950371	0.492064	0.237376	0.298474	0.67343	0.256286	0.519191
0.0925903	0.0672507	0.0130956	0.199425	0.0698926	0.0446552	0.404633	0.260711	0.231698	0.702498	0.295078	0.580574
0.131711	0.0674256	0.0218941	0.275939	0.0817875	0.0828315	0.180926	0.148178	0.0546907	0.387226	0.240793	0.207925
0.158039	0.0648321	0.0291797	0.236286	0.0710668	0.0608814	0.500887	0.238895	0.307958	0.660226	0.281822	0.515322
0.186408	0.0666313	0.0391878	0.246166	0.0663249	0.0649969	0.229839	0.0980648	0.0624426	0.720539	0.290275	0.603436
0.151487	0.066928	0.0274278	0.41968	0.099491	0.186029	0.105304	0.136625	0.0297554	0.366881	0.188525	0.170143
0.159862	0.0691034	0.0303311	0.3104	0.067412	0.100893	0.155	0.133051	0.0417274	0.42891	0.235409	0.239381
0.162924	0.0681663	0.031191	0.334292	0.0828826	0.118621	0.275557	0.110767	0.0882011	0.493171	0.219679	0.291477
0.1794	0.0708771	0.0372079	0.321058	0.0806587	0.109584	0.119742	0.0909908	0.0226174	0.460611	0.260759	0.280157
0.198226	0.0687603	0.0440215	0.348998	0.0717922	0.126954	0.286126	0.288946	0.165358	0.415926	0.300646	0.263382
0.19341	0.0697759	0.0422761	0.428107	0.0816703	0.189946	0.136669	0.172827	0.0485477	0.452096	0.25384	0.268826
0.145953	0.0658774	0.0256422	0.22251	0.0689569	0.0542658	0.28744	0.131104	0.0998098	0.504824	0.221981	0.304123
0.233038	0.0666376	0.0587471	0.375584	0.084077	0.148132	0.155205	0.124697	0.0396382	0.438226	0.217466	0.239333
0.216313	0.0668693	0.0512629	0.372335	0.0904533	0.146815	0.52312	0.316541	0.373852	0.54719	0.329383	0.407909
0.177382	0.0704942	0.0364338	0.281671	0.07205	0.0845298	0.314658	0.28659	0.181143	0.554707	0.276034	0.383895
0.158612	0.0683873	0.0298345	0.254585	0.0679085	0.0694249	0.49669	0.241898	0.305215	0.827001	0.262247	0.752704
0.173836	0.0665793	0.0346518	0.277879	0.0821294	0.0839621	0.339088	0.303091	0.206844	0.526167	0.330188	0.385875
0.18895	0.0679514	0.0403196	0.253849	0.0687193	0.0691616	0.220746	0.162849	0.0752485	0.295889	0.228794	0.139897
0.176927	0.0662442	0.0356914	0.390635	0.0900204	0.160699	0.111949	0.0884203	0.0203506	0.629494	0.218535	0.44402
0.184036	0.0672784	0.0383957	0.318633	0.0821836	0.108281	0.4084	0.250224	0.229403	0.602158	0.273232	0.43725
0.183101	0.0665946	0.0379606	0.353052	0.0808537	0.131183	0.451753	0.247456	0.265315	0.647926	0.254564	0.484611
0.173152	0.0692713	0.0347801	0.337781	0.0836264	0.12109	0.166826	0.145474	0.0489935	0.513781	0.257899	0.330483
0.220641	0.0677491	0.0532723	0.392672	0.0899784	0.162287	0.292599	0.0896154	0.0936449	0.507363	0.217823	0.304864
0.107451	0.0673809	0.0160859	0.308302	0.0808524	0.101587	0.17769	0.102173	0.0420131	0.480824	0.21707	0.278311
0.140475	0.0680604	0.0243654	0.325747	0.0837063	0.113118	0.434111	0.244632	0.248297	0.731745	0.234761	0.590564
0.212053	0.0676196	0.049539	0.301944	0.0901243	0.0992927	0.648749	0.325492	0.526821	0.935331	0.273347	0.949562
0.139436	0.0678173	0.0240416	0.290103	0.0776195	0.0901846	0.452421	0.237198	0.260948	0.825944	0.249258	0.744313
0.119724	0.0671238	0.0188395	0.331033	0.0830224	0.116476	0.515154	0.309376	0.361097	0.614301	0.311497	0.474396
0.152194	0.0682115	0.0278159	0.324781	0.0911166	0.113785	0.688876	0.31849	0.575986	0.785731	0.317538	0.718203
0.204468	0.0667931	0.0462685	0.341694	0.0832843	0.123691	0.438675	0.268467	0.26451	0.546701	0.288956	0.382377
0.163071	0.0646442	0.0307709	0.372945	0.0922679	0.147601	0.596066	0.33538	0.467775	0.757483	0.307273	0.668197
0.196071	0.0689486	0.0431976	0.307779	0.0807695	0.101252	0.154947	0.105955	0.035235	0.394114	0.207386	0.198335
0.180382	0.0695402	0.0373737	0.47117	0.098496	0.231702	0.544933	0.308255	0.391973	0.728208	0.310255	0.626544
0.158971	0.0679628	0.0298907	0.283543	0.069481	0.0852243	0.441107	0.25807	0.261175	0.834983	0.264393	0.7671
0.143632	0.0694964	0.0254598	0.285619	0.080987	0.0881371	0.470388	0.270686	0.294536	0.655827	0.289192	0.513741
0.175307	0.0638233	0.0348058	0.266282	0.0692116	0.0756961	0.22356	0.115607	0.0633441	0.404191	0.228601	0.215629
0.162654	0.0675896	0.0310246	0.421939	0.089964	0.186126	0.531949	0.317113	0.383531	0.668773	0.291036	0.531959
0.186869	0.0673217	0.0394521	0.484353	0.0987332	0.244346	0.371304	0.276874	0.214526	0.517973	0.296304	0.356092
0.174357	0.0669784	0.0348865	0.384232	0.0809054	0.15418	0.476926	0.25157	0.290746	0.859769	0.307389	0.833691
0.149607	0.0638553	0.0264598	0.346478	0.0895174	0.12806	0.524636	0.316927	0.375686	0.692241	0.266641	0.550295
0.15974	0.0676701	0.0300962	0.249688	0.0680484	0.0669748	0.405621	0.267892	0.236294	0.561175	0.310152	0.411112
0.165879	0.0663402	0.031917	0.257273	0.0660615	0.0705536	0.458869	0.332101	0.320852	0.485398	0.340397	0.351481
0.189016	0.0659447	0.0400759	0.310404	0.0795074	0.102672	0.218041	0.12244	0.0625336	0.653756	0.257602	0.493756
0.196973	0.0671837	0.0433121	0.315859	0.0700832	0.104679	0.651802	0.305959	0.518457	0.744659	0.291622	0.639561
0.180542	0.0700253	0.0374988	0.266955	0.0703322	0.0762116	0.401024	0.279917	0.239174	0.651025	0.270541	0.497026
0.201125	0.0679514	0.0450688	0.282854	0.067393	0.084548	0.187141	0.115215	0.0482961	0.458199	0.240575	0.267823
0.204118	0.0677688	0.0462567	0.273479	0.0713566	0.0798826	0.127229	0.0926268	0.024767	0.41691	0.224092	0.224031
0.137078	0.0643099	0.0229261	0.436378	0.107483	0.201978	0.348732	0.113199	0.134428	0.855107	0.281628	0.810522
0.184269	0.0660728	0.0383209	0.450551	0.0992137	0.21284	0.384936	0.271756	0.222028	0.718382	0.289746	0.600025
0.230807	0.0685323	0.0579686	0.32078	0.0808377	0.109434	0.376358	0.273248	0.216309	0.550169	0.293299	0.38871
0.166096	0.0638983	0.031671	0.398453	0.0913849	0.167116	0.427071	0.260455	0.250227	0.626307	0.273103	0.466845
0.210431	0.0677048	0.048865	0.269605	0.0792037	0.0789602	0.591841	0.310174	0.446484	0.705033	0.315011	0.596303
0.192713	0.069665	0.0419916	0.37843	0.0912981	0.151545	0.309841	0.162018	0.122251	0.778323	0.278645	0.68343
0.20342	0.0699178	0.0462682	0.367442	0.0911123	0.143315	0.37524	0.254434	0.205542	0.835973	0.267959	0.770653
0.179232	0.0693904	0.0369392	0.370229	0.0905472	0.145268	0.261414	0.137677	0.0872919	0.555392	0.24921	0.370566
0.229538	0.0645822	0.0568584	0.237755	0.0710922	0.0615817	0.332516	0.146364	0.131989	0.770412	0.265407	0.663975
0.162345	0.0693645	0.0311674	0.229164	0.0723373	0.0577488	0.50154	0.264837	0.321681	0.592486	0.284488	0.431973
0.1847	0.0675445	0.0386762	0.509749	0.107272	0.271352	0.561128	0.307279	0.409285	0.736564	0.295902	0.630084
0.219961	0.0676169	0.0529551	0.330944	0.0826151	0.116349	0.182943	0.0932433	0.0421625	0.492292	0.233447	0.296849
0.152506	0.0651165	0.0274984	0.378246	0.0989039	0.152852	0.314555	0.287571	0.181642	0.399317	0.32282	0.263666
0.158264	0.0680241	0.0296749	0.278684	0.0670801	0.0821644	0.273351	0.148274	0.0967061	0.618562	0.262548	0.45155
0.107397	0.0671072	0.0160376	0.2837	0.0707161	0.0854867	0.370212	0.268196	0.208986	0.456324	0.29809	0.297089
0.223378	0.0681742	0.0545457	0.40577	0.0901003	0.172768	0.744072	0.313243	0.651765	0.89958	0.295852	0.896773
0.191902	0.0655185	0.0411192	0.343148	0.0910959	0.126049	0.411071	0.269702	0.241718	0.646844	0.265715	0.489012
0.191001	0.0669747	0.0409668	0.311537	0.0810305	0.103621	0.396985	0.273419	0.232355	0.556004	0.260417	0.376958
0.2057	0.0694633	0.0471375	0.369904	0.0995937	0.146748	0.14009	0.110176	0.0317639	0.296793	0.213754	0.133777
0.198056	0.0686283	0.043936	0.39726	0.0909263	0.166083	0.439045	0.265582	0.263295	0.729843	0.270059	0.605602
0.234822	0.0701862	0.0600674	0.286559	0.0740763	0.0876032	0.775724	0.33212	0.712052	0.823495	0.292819	0.763886
0.122023	0.0684324	0.0195726	0.175558	0.0680421	0.0354504	0.767177	0.293268	0.674567	0.934593	0.304782	0.966357
0.187734	0.0656069	0.0395483	0.283288	0.0692713	0.0850507	0.100688	0.0993588	0.0200102	0.391793	0.183956	0.187342
0.156069	0.0653278	0.0286252	0.294753	0.0808233	0.0934119	0.196315	0.133765	0.0564325	0.535776	0.260195	0.354758
0.233267	0.0664735	0.0588323	0.30513	0.0683162	0.0977717	0.23712	0.133255	0.0739826	0.437834	0.214407	0.237669
0.19513	0.0665749	0.0425079	0.375247	0.0934817	0.149549	0.344418	0.278802	0.196354	0.396864	0.270288	0.230556
0.0845908	0.0690116	0.0119182	0.325864	0.0909382	0.114457	0.179992	0.119992	0.0467954	0.483923	0.195573	0.27243
0.198261	0.0686666	0.0440226	0.345686	0.0786179	0.12568	0.106295	0.0940772	0.0201491	0.42333	0.198504	0.218612
0.211649	0.0641275	0.0489077	0.493857	0.0982964	0.253556	0.423771	0.267867	0.251334	0.702226	0.278525	0.570698
0.160739	0.0686382	0.0305483	0.340496	0.0898279	0.124006	0.194481	0.148574	0.0598972	0.686384	0.295425	0.558399
0.202395	0.06823	0.045619	0.344654	0.0797357	0.125144	0.099844	0.122042	0.0248632	0.499142	0.228795	0.30149
0.243633	0.0653699	0.0636303	0.322357	0.0700885	0.108826	0.546403	0.29711	0.386831	0.694636	0.301626	0.573497
0.151005	0.0675964	0.0273716	0.223685	0.0680571	0.0546668	0.399454	0.152595	0.182849	0.511655	0.220238	0.310296
0.178959	0.0664405	0.0364406	0.315127	0.0801964	0.105736	0.350132	0.287329	0.205151	0.414688	0.295828	0.259481
0.200307	0.0692191	0.0449144	0.401583	0.100312	0.171331	0.429199	0.172792	0.214069	0.967228	0.273242	1.01019
0.209359	0.065439	0.0481134	0.228268	0.0681201	0.0567467	0.21844	0.127839	0.0640589	0.389568	0.22912	0.204259
0.231333	0.0672865	0.0580424	0.24714	0.0659502	0.0654277	0.213092	0.133219	0.0631556	0.412598	0.219788	0.218544
0.166783	0.0702767	0.0327555	0.326017	0.0918668	0.114727	0.208371	0.1351	0.0616704	0.50568	0.265628	0.32627
0.213351	0.0693439	0.0503274	0.286152	0.0687373	0.086608	0.188502	0.140429	0.0552533	0.364185	0.258619	0.199514
0.157588	0.0693522	0.0296438	0.255633	0.0665548	0.0697776	0.554375	0.36209	0.438441	0.596498	0.335613	0.468446
0.187417	0.0669678	0.03961	0.348991	0.0693873	0.126609	0.288937	0.132425	0.101021	0.481556	0.201212	0.272382
0.157822	0.0662275	0.0292939	0.263232	0.0808607	0.0758297	0.424896	0.26463	0.250566	0.632724	0.292511	0.485902
0.221926	0.0661908	0.0536324	0.297932	0.0692473	0.0935586	0.603426	0.343018	0.481784	0.58374	0.345152	0.459883
0.148057	0.0677696	0.0265135	0.407222	0.100466	0.175923	0.362033	0.271482	0.20477	0.526333	0.267253	0.348451
0.206638	0.068772	0.0474289	0.351206	0.0904513	0.131527	0.22853	0.125449	0.0679633	0.684895	0.232088	0.522946
0.202585	0.0682242	0.0456953	0.351093	0.0821696	0.130018	0.653264	0.316376	0.526847	0.71072	0.307341	0.599581
0.144222	0.0656877	0.0251148	0.251418	0.0681388	0.0678538	0.47932	0.250041	0.292268	0.723725	0.28908	0.607344
0.192122	0.0666242	0.0413497	0.286115	0.0737837	0.0873059	0.0908876	0.0949611	0.0172782	0.381624	0.226759	0.197057
0.160495	0.0687362	0.0304833	0.368332	0.0902782	0.143819	0.521547	0.262415	0.340873	0.739058	0.265456	0.616674
0.13763	0.0691707	0.0237266	0.356885	0.100036	0.137374	0.235397	0.1587	0.0805975	0.634944	0.26039	0.470956
0.185954	0.0690976	0.0393532	0.314704	0.0676173	0.103611	0.605758	0.292537	0.452521	0.881704	0.28032	0.855982
0.160787	0.0689454	0.0306058	0.326745	0.0805469	0.11325	0.560292	0.282238	0.393585	0.673844	0.275284	0.529847
0.189304	0.0660615	0.0402003	0.29554	0.0697818	0.0922132	0.625079	0.272039	0.464729	0.986419	0.30044	1.06329
0.160661	0.0679321	0.0304267	0.326962	0.0929037	0.115535	0.409104	0.281439	0.246575	0.608836	0.297523	0.459202
0.141616	0.0703566	0.025005	0.291556	0.0732249	0.0903666	0.370783	0.145219	0.158569	0.775605	0.248355	0.663243
0.145836	0.0646469	0.0254474	0.350377	0.0896378	0.130799	0.415114	0.265654	0.242892	0.509996	0.275956	0.336247
0.154466	0.0663541	0.0282625	0.295819	0.0817702	0.0941953	0.402835	0.257518	0.228592	0.525317	0.261419	0.344297
0.172362	0.0693899	0.0345235	0.260544	0.0724714	0.0731351	0.592481	0.284885	0.432193	0.7814	0.265207	0.680921
0.134407	0.0665777	0.0224978	0.366975	0.0905199	0.142864	0.212374	0.0994407	0.0549911	0.574863	0.206452	0.37309
0.196813	0.0692762	0.0435344	0.252094	0.0727347	0.0688418	0.370345	0.274823	0.212683	0.530035	0.26977	0.353713
0.204243	0.0686196	0.0464237	0.336474	0.0841036	0.120288	0.510204	0.230293	0.313343	0.814259	0.297531	0.751543
0.232333	0.0683543	0.0586511	0.386225	0.0833782	0.156122	0.285815	0.134525	0.099787	0.577329	0.267872	0.405064
0.172105	0.0653158	0.0338863	0.307577	0.0805978	0.1011	0.328182	0.283191	0.187901	0.736807	0.245248	0.603031
0.111626	0.0673871	0.0170013	0.233874	0.0839985	0.0617526	0.213931	0.117356	0.0595391	0.454118	0.261029	0.274359
0.181861	0.067084	0.0375738	0.430992	0.099545	0.195663	0.179763	0.107876	0.0439519	0.607745	0.233047	0.423665
0.109105	0.0691534	0.0166861	0.285304	0.0922721	0.0899127	0.446755	0.239423	0.256914	0.813364	0.24675	0.722447
0.182662	0.0698964	0.0382509	0.28755	0.0734132	0.0880743	0.280416	0.128668	0.0951884	0.37712	0.224279	0.192521
0.148018	0.0683757	0.0265844	0.463021	0.107158	0.225871	0.247274	0.16321	0.087782	0.473828	0.224122	0.274744
0.212303	0.0682645	0.0497327	0.313301	0.0718614	0.103321	0.593055	0.342855	0.469264	0.860958	0.284937	0.822438
0.153353	0.0673184	0.028049	0.281261	0.0737974	0.0845536	0.547878	0.305682	0.393611	0.599494	0.307759	0.454109
0.11762	0.0674265	0.0183807	0.211563	0.0689028	0.0495066	0.508221	0.366372	0.392517	0.570039	0.331107	0.434576
0.183169	0.0694473	0.0383738	0.310309	0.0717579	0.101441	0.166438	0.0977649	0.0372594	0.549701	0.240675	0.360095
0.192231	0.0675992	0.0415225	0.264532	0.067535	0.0745381	0.241001	0.123048	0.0732225	0.535911	0.237062	0.343399
0.117721	0.0687247	0.0185813	0.242019	0.0811635	0.0651605	0.312015	0.160119	0.122991	0.42014	0.219933	0.224888
0.205541	0.0702543	0.0471826	0.55071	0.106506	0.314625	0.467554	0.261751	0.28712	0.500591	0.319804	0.352866
0.166739	0.0690352	0.0325677	0.335882	0.0889737	0.120733	0.27055	0.143103	0.0936759	0.559793	0.229312	0.365952
0.176997	0.0660425	0.0356896	0.282929	0.0724013	0.0852908	0.456003	0.268868	0.280229	0.575448	0.266421	0.402121
0.191605	0.0672796	0.0412388	0.338514	0.0703844	0.119546	0.457575	0.247039	0.270403	0.702194	0.27569	0.569082
0.211888	0.067261	0.0494207	0.374723	0.101387	0.150697	0.383888	0.275451	0.223243	0.549094	0.269426	0.374094
0.160886	0.0648809	0.0300938	0.265317	0.070971	0.0754302	0.210016	0.154536	0.0679881	0.552058	0.255077	0.369832
0.175201	0.0677522	0.0352856	0.309809	0.0790318	0.102228	0.744378	0.286337	0.636087	0.81162	0.292198	0.744107
0.138295	0.0678335	0.0237269	0.300672	0.0675893	0.0949719	0.381091	0.276148	0.221488	0.628058	0.271792	0.468328
0.17645	0.0654485	0.035418	0.298596	0.0829766	0.0960446	0.555247	0.355287	0.434528	0.770981	0.291242	0.679233
0.166276	0.0682378	0.0323041	0.304803	0.0672432	0.0974264	0.174241	0.116287	0.0438826	0.495656	0.227693	0.297519
0.205545	0.0668695	0.0467204	0.367701	0.0792453	0.141484	0.20529	0.123297	0.0573464	0.406998	0.20236	0.206597
0.182967	0.0687603	0.0382048	0.337677	0.0906874	0.12225	0.5669	0.234326	0.376284	0.801559	0.274006	0.717576
0.244573	0.0695577	0.0646541	0.32497	0.0714203	0.110706	0.40008	0.258033	0.226645	0.667079	0.239472	0.502341
0.15976	0.0693036	0.0303263	0.326382	0.0808274	0.113058	0.561663	0.291041	0.40017	0.475474	0.322731	0.330232
0.190792	0.0688596	0.0411433	0.389589	0.0820149	0.158506	0.294658	0.140045	0.106436	0.744009	0.269517	0.626189
0.145107	0.0694796	0.0258836	0.3303	0.0699901	0.113997	0.28342	0.119809	0.0946809	0.642771	0.25125	0.476281
0.219606	0.068003	0.0528511	0.258998	0.0679501	0.071697	0.226456	0.174763	0.0818244	0.397574	0.209139	0.201804
0.188887	0.0658501	0.0400145	0.325655	0.0806438	0.112555	0.290028	0.168025	0.112349	0.416864	0.227282	0.225432
0.162514	0.068292	0.0310745	0.282204	0.0704723	0.0846055	0.415986	0.261807	0.241587	0.621029	0.266412	0.456653
0.205834	0.0667372	0.0468213	0.370555	0.0815919	0.143968	0.333231	0.283331	0.191319	0.595404	0.294435	0.441198
0.221815	0.0688054	0.0539359	0.400044	0.0930166	0.168688	0.368428	0.365811	0.269557	0.527872	0.340614	0.394666
0.100809	0.0652215	0.0144163	0.273237	0.0808596	0.0811967	0.72003	0.328946	0.626648	0.805595	0.297718	0.737619
0.211693	0.0693555	0.0496242	0.313195	0.0670321	0.102585	0.258621	0.165043	0.094124	0.619245	0.254167	0.448066
0.243672	0.0672059	0.0638925	0.435859	0.0786761	0.196163	0.433146	0.336188	0.300638	0.646179	0.298798	0.506828
0.248301	0.0692078	0.0664429	0.358326	0.0848574	0.135598	0.334669	0.29387	0.198362	0.641594	0.279014	0.489491
0.1048	0.0687602	0.0157111	0.223338	0.0698228	0.0547552	0.285657	0.135573	0.0999797	0.483324	0.228904	0.286
0.161364	0.0670367	0.0305321	0.399075	0.0903292	0.16742	0.529306	0.297388	0.368605	0.623011	0.318655	0.489683
0.18547	0.067066	0.038897	0.319701	0.072811	0.10751	0.34209	0.288565	0.200296	0.543158	0.309382	0.390738
0.141896	0.0677832	0.0247291	0.229692	0.0700563	0.0576664	0.234094	0.126037	0.0706853	0.802554	0.261757	0.71261
0.150609	0.0673591	0.0272204	0.266202	0.0830046	0.0777532	0.356446	0.184507	0.161096	0.707551	0.279194	0.578578
0.191533	0.0685309	0.0413814	0.260791	0.0703881	0.0729663	0.546212	0.242117	0.356968	0.682774	0.273206	0.540822
0.15906	0.0667581	0.0297569	0.276181	0.0663211	0.0806745	0.541713	0.312387	0.391039	0.634944	0.302294	0.494536
0.219988	0.0669513	0.0528771	0.377454	0.0905884	0.150678	0.222835	0.0937641	0.0584473	0.588506	0.260601	0.414252
0.204668	0.0661217	0.046261	0.364801	0.0819928	0.139802	0.264032	0.179888	0.102073	0.640012	0.269517	0.482254
0.185162	0.0697196	0.0391459	0.347251	0.0907387	0.128817	0.234472	0.12575	0.0707903	0.347559	0.230593	0.17397
0.141144	0.0700161	0.0248238	0.296144	0.0695309	0.0925356	0.469375	0.243679	0.279692	0.803639	0.232472	0.699878
0.154779	0.0709408	0.0289893	0.248327	0.0687288	0.06639	0.764642	0.324041	0.68968	0.94098	0.299255	0.974997
0.161408	0.0686429	0.0307644	0.272152	0.0914378	0.0824276	0.537466	0.242385	0.34762	0.73325	0.25997	0.605239
0.184611	0.0661754	0.0384606	0.297884	0.0685905	0.0934396	0.510995	0.241556	0.319465	0.639577	0.299768	0.498919
0.210765	0.065786	0.0487496	0.323826	0.0825857	0.111683	0.390361	0.267526	0.223952	0.809649	0.29859	0.744687
0.13309	0.0688939	0.0224594	0.280507	0.0799739	0.0850799	0.305045	0.275329	0.168859	0.370209	0.269488	0.209679
0.250545	0.0671584	0.0672829	0.439064	0.101035	0.202985	0.389998	0.264406	0.222009	0.634456	0.306506	0.49648
0.149695	0.0689505	0.0271628	0.292535	0.0668194	0.0900416	0.303676	0.165642	0.119656	0.815086	0.286935	0.746696
0.161849	0.0687673	0.0309239	0.259856	0.0692401	0.0723193	0.211562	0.167049	0.0726641	0.571898	0.268526	0.399173
0.177975	0.0652383	0.0359311	0.363914	0.0804865	0.138912	0.575555	0.302296	0.422646	0.573042	0.313331	0.426554
0.142128	0.0688279	0.0249377	0.322343	0.0797475	0.110265	0.616212	0.319404	0.481736	0.793369	0.276901	0.706108
0.20583	0.0684886	0.0470565	0.333362	0.0841023	0.118203	0.256518	0.146666	0.0873124	0.72999	0.251426	0.5961
0.217745	0.0669542	0.0518956	0.43252	0.099609	0.196995	0.561212	0.307835	0.409721	0.73187	0.266499	0.606655
0.176902	0.0702473	0.0362289	0.323568	0.0909177	0.112962	0.381732	0.288992	0.229235	0.666451	0.289024	0.527692
0.137873	0.0664131	0.0234197	0.247326	0.0721781	0.0663799	0.25479	0.148273	0.0869027	0.414706	0.185307	0.20632
0.184514	0.0665688	0.0384768	0.335253	0.0923177	0.120917	0.30277	0.131568	0.10898	0.638741	0.251198	0.471091
0.179838	0.067367	0.0368799	0.276401	0.0708224	0.0814135	0.475921	0.272428	0.300717	0.442254	0.3234	0.300176
0.174649	0.0704386	0.0354638	0.292706	0.0810986	0.0922536	0.502883	0.320808	0.355809	0.599649	0.318751	0.461181
0.278616	0.0656987	0.0819432	0.257161	0.0704292	0.071092	0.186951	0.133563	0.0527899	0.631621	0.256272	0.46462
0.151341	0.0672571	0.0274277	0.315476	0.0793004	0.105813	0.266441	0.136873	0.0897253	0.721915	0.261743	0.58967
0.133127	0.0653931	0.021999	0.241278	0.0820157	0.0649417	0.428292	0.249824	0.245846	0.626705	0.279169	0.470694
0.154763	0.067928	0.0285658	0.310368	0.0802917	0.102775	0.249357	0.130805	0.0792888	0.735387	0.237525	0.597213
0.142556	0.0670455	0.0248173	0.274378	0.0702358	0.0802165	0.774623	0.305251	0.693219	0.878941	0.275473	0.848423
0.221471	0.0698468	0.0539279	0.253527	0.0689684	0.0690328	0.538001	0.351811	0.413216	0.495287	0.356026	0.372063
0.222403	0.0655798	0.0537639	0.360706	0.0908363	0.13836	0.526773	0.327453	0.384715	0.606622	0.327666	0.475355
0.161316	0.0683378	0.0306931	0.313245	0.0839058	0.105163	0.563469	0.305121	0.410596	0.778263	0.30866	0.700965
0.154451	0.069056	0.0286239	0.250252	0.0663702	0.067031	0.392636	0.270852	0.227524	0.494744	0.294157	0.3313
0.153146	0.0658101	0.0277847	0.260577	0.083184	0.0748199	0.279206	0.166162	0.105566	0.50341	0.257526	0.319741
0.211083	0.0668398	0.0490235	0.24436	0.0686991	0.0644314	0.236872	0.14551	0.0772818	0.529193	0.241352	0.338297
0.207612	0.0666941	0.0475508	0.27422	0.0712528	0.0802734	0.241793	0.111266	0.0708439	0.475692	0.195061	0.264331
0.157459	0.0660887	0.0291609	0.313271	0.0820869	0.104877	0.317513	0.143391	0.121376	0.691952	0.277733	0.555934
0.179058	0.0673406	0.0365964	0.349775	0.0888433	0.130236	0.65675	0.317254	0.53197	0.811593	0.263738	0.728241
0.134817	0.0680202	0.0228025	0.316577	0.082071	0.106957	0.236978	0.148122	0.0780987	0.515213	0.262798	0.334507
0.175564	0.070375	0.0357752	0.40757	0.0916617	0.174516	0.272349	0.161193	0.100157	0.595939	0.250853	0.41807
0.179425	0.0687873	0.0369252	0.300579	0.080872	0.0968882	0.541203	0.305817	0.386424	0.574176	0.321034	0.432741
0.172141	0.068174	0.0342802	0.338783	0.0803029	0.121222	0.583336	0.280037	0.418701	0.719568	0.287941	0.600688
0.177145	0.0671898	0.0358948	0.320257	0.0809717	0.109121	0.465595	0.258139	0.283414	0.453643	0.27783	0.282981
0.206094	0.0682	0.047126	0.302836	0.0782029	0.0978254	0.516392	0.255528	0.331955	0.727702	0.27511	0.605236
0.152579	0.0675208	0.0278393	0.307242	0.0727045	0.0996835	0.369467	0.269901	0.209353	0.809642	0.263339	0.724868
0.161741	0.0665724	0.030592	0.400586	0.0989243	0.170256	0.686932	0.330856	0.581341	0.778928	0.298792	0.696005
0.173286	0.0675401	0.0345898	0.334818	0.0805283	0.118588	0.463373	0.270885	0.288094	0.642225	0.266903	0.48369
0.119947	0.0663069	0.0187838	0.29091	0.0905867	0.0928347	0.243642	0.092653	0.0679458	0.397558	0.23967	0.215494
0.235377	0.0686826	0.0601194	0.477208	0.0989073	0.23751	0.637265	0.285729	0.487748	0.922283	0.264432	0.920531
0.184256	0.0699818	0.0388478	0.329492	0.078908	0.114791	0.44162	0.287488	0.277678	0.553157	0.281313	0.38512
0.18237	0.0672935	0.0377872	0.304504	0.0926573	0.101308	0.246123	0.132358	0.0780952	0.589625	0.245355	0.407857
0.169979	0.0679854	0.0335147	0.288476	0.0696823	0.0880738	0.336489	0.279229	0.191194	0.570253	0.282961	0.405256
0.148169	0.0661483	0.0263295	0.237376	0.0699813	0.0612446	0.120906	0.152021	0.0377285	0.556411	0.266004	0.380352
0.173609	0.0682016	0.0347916	0.418192	0.0993334	0.184751	0.248323	0.13246	0.0792098	0.698699	0.273825	0.56316
0.210894	0.0682522	0.0491345	0.404283	0.0830684	0.170345	0.465974	0.252855	0.281068	0.872406	0.281559	0.840368
0.153924	0.0668515	0.0281616	0.259198	0.0691363	0.0719637	0.539314	0.360727	0.420984	0.625999	0.319588	0.494011
0.163404	0.0655166	0.0309933	0.242573	0.0669962	0.0633303	0.617899	0.286946	0.464137	0.747559	0.2979	0.64759
0.138806	0.0700575	0.0241752	0.546045	0.128452	0.314665	0.730833	0.278588	0.611729	0.842529	0.294355	0.7965
0.206408	0.0715003	0.0477165	0.241506	0.068976	0.0630828	0.377042	0.270954	0.215577	0.720839	0.303638	0.611805
0.0849643	0.0685521	0.0119183	0.266292	0.0918003	0.0793388	0.639333	0.283775	0.489275	1.02386	0.257685	1.11469
0.255924	0.0664337	0.0699104	0.42259	0.0981522	0.188216	0.424054	0.268997	0.252181	0.599754	0.311259	0.456587
0.17727	0.0690354	0.0361904	0.277377	0.0701382	0.0818574	0.217295	0.119994	0.0616157	0.522077	0.23798	0.329199
0.177783	0.0649508	0.0358254	0.273092	0.0818804	0.0812836	0.686439	0.303118	0.563079	0.743277	0.300252	0.642612
0.165299	0.0685174	0.0320183	0.339466	0.0810626	0.121808	0.477772	0.256651	0.294136	0.705672	0.288699	0.58132
0.196272	0.0700161	0.0434251	0.35211	0.0794617	0.130296	0.433553	0.266176	0.258818	0.593147	0.264687	0.421882
0.207545	0.0671092	0.0475786	0.301406	0.0818176	0.0975395	0.343929	0.164915	0.145484	0.853124	0.219011	0.775786
0.224122	0.0688085	0.0549654	0.241063	0.0703928	0.0630666	0.225386	0.133663	0.0686646	0.556962	0.211292	0.354851
0.151376	0.0666317	0.0273544	0.434981	0.107908	0.200853	0.376142	0.277682	0.21859	0.762296	0.272833	0.655534
0.17239	0.0690173	0.0344818	0.339023	0.0799008	0.121321	0.575412	0.284312	0.411932	0.602446	0.310613	0.459422
0.16242	0.0682844	0.031043	0.286477	0.0707062	0.0870686	0.419378	0.257201	0.24203	0.597146	0.255224	0.421723
0.212645	0.0662698	0.0496096	0.326203	0.0729026	0.111723	0.554633	0.322673	0.411735	0.667469	0.32725	0.552608
0.162272	0.0651705	0.0305795	0.357642	0.0840495	0.134972	0.273476	0.136274	0.0933594	0.812079	0.248723	0.721335
0.230236	0.068314	0.0576753	0.250308	0.0684707	0.0673421	0.217851	0.150531	0.0701186	0.345933	0.21895	0.167609
0.121737	0.067767	0.0194124	0.27053	0.0673183	0.077718	0.0557533	0.102249	0.0135632	0.718114	0.23595	0.57136
0.177479	0.0628031	0.035443	0.377251	0.0791908	0.14859	0.379977	0.146778	0.165926	0.627341	0.258632	0.460446
0.162466	0.0669448	0.0308768	0.297228	0.0715322	0.0934611	0.447423	0.264684	0.270245	0.641137	0.259779	0.478542
0.152366	0.0694576	0.0280397	0.27852	0.0711841	0.0826405	0.516462	0.25048	0.329473	0.784239	0.273109	0.689619
0.17257	0.067022	0.0342723	0.310451	0.0832416	0.103309	0.330465	0.282919	0.18925	0.613339	0.289536	0.460016
0.209129	0.0686286	0.048445	0.269481	0.0659716	0.0769725	0.451442	0.26973	0.276554	0.687782	0.280441	0.551691
0.175354	0.0691623	0.0355323	0.248509	0.0669435	0.066238	0.517504	0.366828	0.402373	0.638677	0.321631	0.511355
0.179234	0.067901	0.0367355	0.240389	0.0694882	0.0626154	0.360907	0.146131	0.151608	0.487564	0.250534	0.300486
0.144384	0.0665535	0.0252763	0.304621	0.0802127	0.0992277	0.586392	0.334633	0.455835	0.604521	0.329375	0.473934
0.200394	0.0654453	0.0444409	0.353752	0.0911613	0.133451	0.43661	0.261182	0.258844	0.649217	0.293126	0.507406
0.107954	0.0670239	0.0161462	0.266578	0.083406	0.0780204	0.632415	0.281811	0.479366	0.887811	0.252684	0.852058
0.195919	0.0663016	0.04278	0.255071	0.0671375	0.0695688	0.144838	0.120189	0.0354233	0.3282	0.165726	0.135181
0.172628	0.067671	0.0343798	0.277845	0.0737714	0.0826403	0.52789	0.264162	0.348449	0.688408	0.274063	0.549016
0.186398	0.0693449	0.0395529	0.350686	0.0795248	0.129305	0.113235	0.0881735	0.0205968	0.502738	0.242306	0.311457
0.145149	0.0710285	0.0261132	0.2511	0.0778969	0.0691191	0.193746	0.151108	0.0603712	0.492862	0.223867	0.293029
0.181123	0.0652206	0.0370594	0.28343	0.0710489	0.0853808	0.338523	0.273897	0.189617	0.538944	0.314887	0.389614
0.179169	0.0700935	0.0370147	0.447091	0.0980459	0.209503	0.448486	0.274953	0.276739	0.548324	0.290784	0.385215
0.173074	0.0664848	0.0343748	0.280338	0.0797095	0.0849428	0.430846	0.254995	0.250651	0.57809	0.291175	0.418971
0.194984	0.071342	0.0431084	0.378553	0.0920396	0.151773	0.347023	0.278983	0.198256	0.630096	0.261223	0.465258
0.170277	0.0678026	0.0335913	0.345356	0.0807482	0.125791	0.446621	0.255244	0.264619	0.552028	0.274396	0.380027
0.188089	0.067177	0.03989	0.256139	0.067648	0.0701835	0.46587	0.331445	0.326891	0.549141	0.306171	0.395297
0.203678	0.0693648	0.0462961	0.276425	0.0690692	0.0811812	0.638111	0.272513	0.481449	0.595488	0.318044	0.455758
0.213078	0.0679865	0.0500242	0.338525	0.0904152	0.122774	0.0553385	0.136833	0.0217855	0.330369	0.235928	0.164806
0.281908	0.067966	0.0840914	0.268935	0.068305	0.0769915	0.151977	0.139656	0.0426006	0.410393	0.229463	0.221076
0.208463	0.0674225	0.0480027	0.347528	0.0780619	0.126869	0.499421	0.261052	0.31757	0.870721	0.282896	0.838185
0.149169	0.0663418	0.0266526	0.327183	0.0826116	0.113873	0.264612	0.163174	0.0966456	0.414208	0.23139	0.22511
0.146043	0.0697516	0.0261937	0.378196	0.0905436	0.15123	0.226814	0.140127	0.0710799	0.830659	0.261773	0.75852
0.140726	0.0673195	0.0243358	0.295141	0.0689163	0.0918577	0.237325	0.162576	0.0827543	0.544023	0.257511	0.362273
0.191311	0.069824	0.0414751	0.290384	0.0685649	0.0890238	0.33083	0.163152	0.136067	0.550008	0.271017	0.375959
0.169921	0.0663427	0.0332743	0.234055	0.0676508	0.0593583	0.271755	0.117872	0.0877448	0.696321	0.245442	0.545105
0.165643	0.0689078	0.0321858	0.310855	0.0806537	0.103136	0.0858981	0.11279	0.0201001	0.329931	0.230273	0.16188
0.175831	0.0709815	0.0359549	0.282159	0.0683263	0.0842822	0.204611	0.117188	0.0555988	0.624144	0.249469	0.45179
0.159328	0.0650109	0.0296117	0.275874	0.0772843	0.0820791	0.164959	0.113304	0.0400493	0.417876	0.189009	0.210344
0.19135	0.0684145	0.0412954	0.353904	0.090126	0.133371	0.489343	0.239619	0.296873	0.648426	0.266624	0.491544
0.170587	0.0670041	0.0335895	0.449597	0.0897437	0.210191	0.48389	0.326197	0.340554	0.728695	0.313521	0.629292
0.164183	0.0679157	0.0315685	0.380769	0.0996028	0.154906	0.655553	0.31889	0.53144	0.793471	0.290008	0.713701
0.170286	0.0685145	0.0336916	0.237127	0.0675855	0.0607969	0.534339	0.316281	0.385551	0.703844	0.296221	0.583143
0.222116	0.0647528	0.0535284	0.297677	0.0709289	0.0936424	0.423608	0.333302	0.290534	0.513882	0.338997	0.378994
0.158782	0.0634289	0.0292351	0.319166	0.0801181	0.108286	0.367289	0.269864	0.207728	0.518052	0.291202	0.353177
0.156149	0.0694719	0.0292088	0.230959	0.0682891	0.0580053	0.504071	0.243469	0.313365	0.723201	0.272829	0.597456
0.177816	0.0671524	0.0361279	0.250903	0.0683968	0.0676307	0.379753	0.262052	0.212883	0.699246	0.253751	0.553335
0.212293	0.0688391	0.0498071	0.337594	0.0811447	0.120554	0.230757	0.0964723	0.0625555	0.586198	0.255381	0.408848
0.216386	0.0703329	0.0517698	0.273288	0.0699321	0.0795766	0.693213	0.267874	0.552301	0.992567	0.253994	1.0497
0.243838	0.066362	0.063861	0.325751	0.0676283	0.110687	0.761365	0.27102	0.653129	0.9264	0.262316	0.927027
0.194083	0.0675606	0.0422325	0.358032	0.083057	0.135085	0.0339497	0.132397	0.0186815	0.38201	0.222241	0.195323
0.206983	0.0680247	0.0474693	0.412348	0.0902494	0.178176	0.333383	0.128675	0.127702	0.325547	0.210773	0.150406
0.157369	0.0700414	0.0296708	0.367985	0.0911267	0.143717	0.409551	0.264354	0.237615	0.578249	0.262195	0.403119
0.198783	0.0660455	0.0438765	0.282515	0.0686073	0.0845219	0.282379	0.10902	0.0916235	0.365615	0.204728	0.175588
0.171219	0.0716858	0.0344547	0.293575	0.0832295	0.0931134	0.476754	0.251196	0.290394	0.616304	0.295824	0.467342
0.209149	0.0668065	0.0482063	0.320432	0.0920411	0.111148	0.185515	0.155866	0.0587099	0.395135	0.279103	0.23403
0.19691	0.0691142	0.0435505	0.274699	0.0714452	0.0805638	0.592271	0.283166	0.430968	0.87302	0.275001	0.837791
0.224682	0.0648683	0.0546898	0.315789	0.0701717	0.104647	0.315873	0.286737	0.181994	0.321631	0.333389	0.214595
0.200692	0.0654098	0.0445557	0.334544	0.0826141	0.118745	0.608111	0.341255	0.486254	0.804609	0.281509	0.726643
0.129012	0.0663869	0.0210513	0.373737	0.0903147	0.147836	0.557792	0.30163	0.402113	0.638656	0.29993	0.497839
0.153545	0.0701834	0.0285016	0.275552	0.0652694	0.0801889	0.225763	0.11634	0.0645042	0.591012	0.259966	0.416878
0.163439	0.0683898	0.0313895	0.266068	0.0699774	0.0756892	0.393546	0.263834	0.224487	0.597081	0.286843	0.438784
0.189698	0.0679211	0.0405985	0.258375	0.0819124	0.0734673	0.461554	0.333449	0.32422	0.618235	0.322696	0.486347
0.206722	0.0680684	0.0473674	0.310157	0.0727246	0.101486	0.196175	0.125667	0.0542768	0.860999	0.28688	0.823619
0.162066	0.067492	0.0308206	0.276294	0.0691981	0.0811269	0.198237	0.161309	0.0653184	0.593303	0.268315	0.424001
0.198594	0.0705691	0.0444196	0.352629	0.0886491	0.132206	0.592675	0.295712	0.438709	0.706318	0.276985	0.575606
0.201265	0.069707	0.0453666	0.337848	0.0806801	0.120651	0.455461	0.2631	0.276666	0.617482	0.270004	0.454187
0.251697	0.0686887	0.0680693	0.297542	0.0666105	0.0929683	0.550541	0.27672	0.379669	0.695416	0.291685	0.568684
0.133368	0.0662095	0.0221707	0.39528	0.0997048	0.166187	0.240348	0.136746	0.0764666	0.498785	0.256638	0.31465
0.260465	0.068734	0.0725664	0.378003	0.0798998	0.14927	0.304766	0.284212	0.173659	0.668866	0.286033	0.529196
0.145051	0.0683926	0.0257173	0.27029	0.070535	0.0780319	0.63476	0.322956	0.507221	0.634504	0.325848	0.508772
0.219874	0.0697596	0.0532109	0.389274	0.0903089	0.15969	0.469967	0.252656	0.284704	0.803264	0.277749	0.722377
0.198992	0.0695276	0.0444319	0.262127	0.0709881	0.0737497	0.45055	0.270254	0.276032	0.811359	0.283557	0.738708
0.206496	0.0656123	0.0469457	0.258468	0.0674253	0.0713521	0.354361	0.274318	0.200823	0.363657	0.278355	0.209728
0.163252	0.0643809	0.030796	0.360917	0.0897058	0.138308	0.557893	0.291406	0.396162	0.741881	0.272479	0.624633
0.18237	0.0666649	0.0377028	0.346906	0.0843571	0.12746	0.655855	0.262007	0.498794	0.827444	0.272559	0.758952
0.159889	0.0684365	0.0302482	0.232202	0.0734982	0.05932	0.241662	0.106929	0.0698345	0.678512	0.277654	0.53747
0.172617	0.070026	0.0347004	0.376681	0.0928914	0.150517	0.737008	0.277858	0.620385	0.967738	0.27766	1.01361
0.220959	0.0687757	0.053553	0.355622	0.0806218	0.132967	0.458186	0.251855	0.273366	0.523339	0.270565	0.347089
0.211572	0.0634526	0.0487888	0.268674	0.0681085	0.0768246	0.368797	0.273231	0.210666	0.520819	0.297492	0.359754
0.191069	0.0667602	0.0409643	0.295726	0.0672704	0.0919789	0.56659	0.296207	0.408763	0.818447	0.292658	0.755504
0.110183	0.0645257	0.0163038	0.270249	0.0695622	0.0778736	0.69372	0.296967	0.569437	0.851862	0.291562	0.810677
0.126168	0.066157	0.0202952	0.284256	0.067405	0.0853448	0.0719836	0.122936	0.0202949	0.305361	0.228445	0.145432
0.175412	0.0657	0.0350859	0.294836	0.0808067	0.0934582	0.511794	0.367652	0.397102	0.608188	0.33657	0.483172
0.197775	0.0705189	0.0440881	0.415287	0.0893483	0.180446	0.24433	0.295465	0.146997	0.440562	0.300725	0.28453
0.25204	0.0691193	0.0683014	0.398527	0.081534	0.165472	0.172226	0.15422	0.0534455	0.400326	0.25805	0.22685
0.157292	0.0688888	0.0294864	0.254464	0.0724577	0.0700019	0.419276	0.269473	0.248408	0.516921	0.288355	0.350356
0.16438	0.0692372	0.0318144	0.254673	0.0809572	0.0714122	0.574289	0.302837	0.421518	0.887199	0.298225	0.87606
0.165993	0.0650391	0.0317837	0.244818	0.0713503	0.0650269	0.483019	0.234108	0.288114	0.764719	0.264116	0.654553
0.202759	0.0648265	0.0453139	0.423427	0.0996409	0.189219	0.0816445	0.082485	0.0134696	0.36557	0.232071	0.187498
0.200368	0.0691942	0.0449352	0.292884	0.0723675	0.0910178	0.455852	0.261052	0.275949	0.601462	0.277782	0.438919
0.196636	0.0677217	0.043252	0.266432	0.0686612	0.0757004	0.243414	0.151337	0.0821533	0.254912	0.242089	0.123587
0.172063	0.0691284	0.0343843	0.369573	0.102459	0.147082	0.249074	0.174064	0.0923358	0.653671	0.249048	0.489311
0.172791	0.0640525	0.0339595	0.26024	0.0677708	0.0723178	0.247478	0.162057	0.0875078	0.277336	0.223753	0.126981
0.124379	0.0671928	0.0199851	0.259575	0.0703908	0.0723338	0.635787	0.367254	0.539101	0.709023	0.344549	0.621428
0.147399	0.0682884	0.0263899	0.23718	0.0668099	0.0607179	0.636804	0.331548	0.515443	0.831269	0.296266	0.778782
0.161448	0.0679587	0.0306838	0.257522	0.0693203	0.0711231	0.225118	0.097031	0.060093	0.561433	0.250719	0.378067
0.185164	0.0709924	0.0393258	0.346129	0.0819802	0.126526	0.364229	0.263302	0.201991	0.658737	0.269858	0.506758
0.214027	0.0704035	0.0507642	0.383412	0.072765	0.1523	0.541392	0.302515	0.38462	0.64421	0.311484	0.512028
0.188187	0.0661821	0.0397944	0.408758	0.0991704	0.176918	0.122189	0.114681	0.028082	0.542687	0.258407	0.361284
0.181417	0.0650846	0.0371481	0.372289	0.0898265	0.146668	0.373271	0.25845	0.206128	0.708012	0.245344	0.561476
0.197108	0.0687914	0.0435839	0.251942	0.0686445	0.0681867	0.227106	0.148062	0.0734997	0.439655	0.237726	0.24981
0.185301	0.0705072	0.0393077	0.313244	0.0703418	0.10307	0.168469	0.163973	0.055269	0.382204	0.250693	0.208927
0.145453	0.0682601	0.0258161	0.229467	0.0690605	0.0574245	0.245534	0.137429	0.0791734	0.609187	0.237009	0.427282
0.140272	0.0662328	0.0240631	0.356449	0.0998561	0.137027	0.422549	0.34817	0.29977	0.519634	0.325379	0.37589
0.198303	0.0677577	0.0439152	0.2726	0.0804813	0.0807882	0.581424	0.349523	0.460221	0.633571	0.330513	0.510651
0.191542	0.0679605	0.0413068	0.307311	0.0795472	0.100768	0.437393	0.24138	0.249577	0.602816	0.263539	0.43284
0.144524	0.0681444	0.0255308	0.27113	0.0696372	0.078361	0.632079	0.326287	0.505987	0.630891	0.321745	0.501544
0.180597	0.0696752	0.0374701	0.294104	0.0814511	0.0931314	0.243027	0.113201	0.0718767	0.621636	0.209206	0.430198
0.143543	0.0688024	0.0253384	0.248216	0.0733598	0.0669928	0.257796	0.148505	0.0885125	0.511557	0.257985	0.328246
0.195122	0.0699043	0.0429591	0.406948	0.0908166	0.173855	0.458045	0.272463	0.284041	0.654694	0.275016	0.504258
0.153772	0.0661414	0.0280205	0.3111	0.0793327	0.103077	0.422682	0.262521	0.247578	0.587743	0.274965	0.421048
0.190081	0.0669177	0.0406086	0.410336	0.101886	0.178756	0.524802	0.25152	0.33868	0.812926	0.272789	0.735262
0.177397	0.067227	0.0359891	0.286687	0.0810735	0.0887626	0.319519	0.278516	0.179664	0.516014	0.296162	0.353982
0.137531	0.0647581	0.0231084	0.343787	0.0996191	0.128113	0.54405	0.29313	0.381916	0.67168	0.286653	0.533324
0.142908	0.0689398	0.0251755	0.216543	0.0714542	0.0519964	0.348938	0.157884	0.146685	0.488081	0.222866	0.287892
0.208332	0.0673005	0.0479317	0.404097	0.0914669	0.171661	0.5269	0.228592	0.329878	0.75714	0.26165	0.641722
0.221167	0.0658353	0.0532491	0.440352	0.0999542	0.2039	0.5594	0.29788	0.401661	0.734511	0.2884	0.622681
0.180013	0.0665046	0.0368275	0.321184	0.0813206	0.109772	0.437184	0.266264	0.262026	0.573712	0.287558	0.411835
0.106222	0.071374	0.0163774	0.30007	0.0926662	0.0986287	0.353322	0.275725	0.200861	0.538944	0.266294	0.361373
0.183965	0.071755	0.0389919	0.256655	0.0699611	0.0707663	0.37749	0.261813	0.211045	0.546402	0.272329	0.372718
0.157366	0.0669175	0.029242	0.408907	0.101148	0.177436	0.500518	0.359868	0.380023	0.531711	0.36685	0.417295
0.226471	0.0688771	0.0560334	0.395993	0.0793951	0.163114	0.563777	0.287849	0.400701	0.76387	0.274711	0.658964
0.173487	0.0651462	0.0343417	0.394143	0.0991421	0.165178	0.503392	0.319918	0.355751	0.553727	0.324903	0.412176
0.159392	0.0730935	0.0307485	0.337618	0.080922	0.120534	0.506678	0.24529	0.31689	0.525864	0.264064	0.346263
0.187691	0.066204	0.0396108	0.36187	0.100881	0.141127	0.164308	0.136621	0.0456622	0.65566	0.246869	0.490834
0.18283	0.0651563	0.0376721	0.354965	0.0996668	0.135934	0.243119	0.142411	0.0793878	0.330467	0.201479	0.149802
0.225039	0.0679456	0.055259	0.336056	0.0728147	0.118236	0.457881	0.340614	0.325672	0.757623	0.310699	0.670526
0.191003	0.0672704	0.0410073	0.269989	0.0734109	0.0782831	0.115801	0.135589	0.0317942	0.241353	0.229439	0.110893
0.16526	0.0699605	0.0322055	0.291681	0.0694855	0.0899063	0.666751	0.319517	0.546648	0.670626	0.296281	0.537522
0.119612	0.067897	0.0189169	0.247937	0.0786793	0.0676633	0.588987	0.30071	0.437332	0.818681	0.29067	0.754727
0.144094	0.0673348	0.025297	0.281107	0.0828855	0.0858909	0.442726	0.253225	0.260129	0.507417	0.299945	0.347439
0.168742	0.0673042	0.0330039	0.223816	0.068769	0.0548229	0.424856	0.260644	0.248438	0.73159	0.283294	0.615479
0.19845	0.0673836	0.0439229	0.330151	0.0918849	0.117443	0.378207	0.27856	0.220637	0.49699	0.301964	0.338181
0.235719	0.0696475	0.0604142	0.337887	0.0809914	0.120727	0.150341	0.136167	0.0411438	0.511222	0.243189	0.320489
0.180785	0.067073	0.0371821	0.289372	0.0704984	0.088706	0.715308	0.250411	0.574371	0.835268	0.276061	0.773882
0.16065	0.0679831	0.03043	0.214878	0.0709428	0.0512053	0.102744	0.124544	0.0260674	0.485168	0.270405	0.308506
0.149856	0.065941	0.0268051	0.310588	0.0784016	0.102612	0.334757	0.274304	0.187305	0.442418	0.322438	0.2997
0.184505	0.0663222	0.0384407	0.449537	0.0910996	0.210383	0.589574	0.286333	0.429584	0.866861	0.280068	0.829887
0.24277	0.0712054	0.0640075	0.411719	0.0823111	0.176288	0.684608	0.305497	0.562017	0.814504	0.298143	0.752307
0.223946	0.0694148	0.05497	0.355133	0.079266	0.132402	0.246255	0.120318	0.0751178	0.742629	0.246556	0.612287
0.132445	0.067131	0.0220482	0.28809	0.0808315	0.0895294	0.362739	0.259322	0.198828	0.542765	0.272754	0.368989
0.17117	0.0649527	0.0335181	0.348446	0.0813455	0.128032	0.605409	0.274658	0.441958	0.81548	0.247395	0.726212
0.180906	0.0690578	0.0374959	0.372338	0.0818568	0.145336	0.491786	0.254734	0.306743	0.73472	0.250104	0.602366
0.177378	0.0661631	0.0358407	0.383211	0.0891806	0.154804	0.149023	0.150388	0.0448242	0.447955	0.250601	0.263465
0.166967	0.0647926	0.0320759	0.373085	0.0904069	0.147365	0.407371	0.266044	0.23673	0.682728	0.258049	0.532706
0.190953	0.0650153	0.0406899	0.280317	0.0685816	0.083281	0.467364	0.251519	0.281691	0.707895	0.269381	0.573681
0.220118	0.0646669	0.0526336	0.424417	0.0911797	0.188443	0.254514	0.133306	0.0825477	0.598678	0.307527	0.452988
0.150479	0.0691859	0.0274306	0.265056	0.0826264	0.077082	0.534539	0.303424	0.377799	0.599039	0.305827	0.452378
0.154102	0.0679288	0.0283617	0.291247	0.0698092	0.0896983	0.225945	0.164629	0.0781537	0.353075	0.231656	0.178326
0.181705	0.0666871	0.0374638	0.431016	0.0999627	0.195768	0.287569	0.15017	0.105247	0.816474	0.263282	0.735947
0.198585	0.0651475	0.0436802	0.275067	0.0671603	0.0801726	0.185436	0.132553	0.0519567	0.329317	0.261295	0.176724
0.202475	0.0659457	0.0453451	0.373662	0.0926989	0.148216	0.287513	0.132884	0.100322	0.555582	0.239455	0.366009
0.16245	0.0683737	0.031065	0.279546	0.0742605	0.0836605	0.375347	0.275103	0.216567	0.580625	0.280625	0.415876
0.134922	0.069414	0.0230224	0.270786	0.0702711	0.0782633	0.187164	0.133614	0.0528831	0.269198	0.211778	0.117317
0.20286	0.066682	0.0455987	0.309486	0.0811121	0.102361	0.126298	0.111687	0.0284251	0.394602	0.176894	0.187002
0.181377	0.0685254	0.0375932	0.242792	0.0706357	0.0639372	0.289314	0.138034	0.102756	0.55979	0.211251	0.357992
0.198033	0.0708719	0.0442397	0.359375	0.091885	0.137593	0.188721	0.09401	0.0444536	0.496831	0.258276	0.313547
0.152444	0.066595	0.0276741	0.299075	0.0709399	0.0944782	0.483428	0.2816	0.313001	0.554413	0.321098	0.410478
0.119875	0.0676958	0.0189527	0.355152	0.0824905	0.132938	0.569274	0.307016	0.418332	0.659457	0.305056	0.527942
0.233637	0.0665204	0.0590113	0.288878	0.0664495	0.0878662	0.356501	0.267664	0.198737	0.472262	0.300247	0.31318
0.195927	0.0674768	0.0429404	0.289975	0.0794035	0.0903901	0.568684	0.2373	0.379712	0.895771	0.28442	0.8833
0.164972	0.067596	0.031785	0.300637	0.090106	0.0985015	0.429608	0.269936	0.257429	0.606278	0.277133	0.444376
0.176116	0.0654844	0.0353049	0.392371	0.0899051	0.162038	0.261605	0.299271	0.158	0.311499	0.285209	0.178376
0.173331	0.0673895	0.0345849	0.287942	0.0689151	0.08766	0.298915	0.152	0.112454	0.850833	0.279518	0.802047
0.167037	0.0663499	0.0323037	0.341627	0.101827	0.127078	0.687623	0.262695	0.541834	0.684935	0.307191	0.563502
0.116066	0.0685562	0.0181712	0.263414	0.0729882	0.0747141	0.419897	0.269759	0.249084	0.627868	0.275373	0.470048
0.198234	0.0696571	0.0441489	0.345862	0.081128	0.126202	0.367921	0.264356	0.20525	0.572365	0.29309	0.413503
0.178522	0.0687209	0.0365926	0.266346	0.0668973	0.0754155	0.389433	0.262008	0.220307	0.670436	0.252535	0.513258
0.219582	0.0670452	0.0527114	0.354828	0.0801249	0.132323	0.684802	0.292382	0.554441	0.76325	0.306762	0.676653
0.135812	0.0685934	0.02315	0.251102	0.0823026	0.069826	0.616647	0.324664	0.485661	0.743074	0.295076	0.639229
0.135089	0.0652777	0.0225102	0.269841	0.0825485	0.0796283	0.419614	0.265389	0.246508	0.386028	0.303046	0.240855
0.146341	0.0675699	0.0259814	0.333263	0.0878063	0.118774	0.224755	0.116438	0.0640725	0.309323	0.246401	0.156394
0.219851	0.0674515	0.0528843	0.317903	0.0800826	0.107476	0.185651	0.115898	0.0478986	0.219204	0.227339	0.0997332
0.0924921	0.0687044	0.0132751	0.330949	0.0905405	0.117725	0.687481	0.293587	0.558824	0.822224	0.269786	0.748837
0.20932	0.0650522	0.0480465	0.358625	0.0924877	0.137166	0.350463	0.1739	0.153065	0.813221	0.258697	0.728253
0.172836	0.0691822	0.0346585	0.289959	0.0702654	0.0890135	0.236544	0.168756	0.0844315	0.5211	0.262292	0.340342
0.180448	0.0693622	0.0373725	0.365028	0.0911532	0.141555	0.270817	0.187427	0.108471	0.383712	0.255718	0.212627
0.190284	0.0695508	0.0410453	0.317209	0.0703936	0.105577	0.206089	0.134991	0.060695	0.492326	0.2523	0.30604
0.226657	0.0645852	0.0555446	0.333791	0.0786221	0.117598	0.415029	0.270707	0.245531	0.663571	0.275433	0.516189
0.135878	0.0669381	0.0229435	0.297237	0.0700883	0.0932621	0.535075	0.303003	0.378116	0.700643	0.281203	0.569975
0.121861	0.0671924	0.0193649	0.3768	0.090094	0.150095	0.417217	0.253947	0.238559	0.877516	0.263902	0.839679
0.191943	0.0650474	0.0410731	0.364621	0.0842049	0.140039	0.201463	0.116878	0.0542479	0.715227	0.262684	0.580552
0.197129	0.0706925	0.0438572	0.361236	0.0805858	0.136986	0.292011	0.278129	0.162626	0.661424	0.270125	0.510449
0.174359	0.0680911	0.0350374	0.342863	0.0812799	0.124162	0.704161	0.281604	0.575144	0.843575	0.294589	0.798401
0.175197	0.067583	0.0352613	0.225854	0.0681242	0.0556508	0.528722	0.303299	0.371537	0.662188	0.299973	0.528477
0.114147	0.0705647	0.018009	0.200988	0.0716166	0.0455252	0.340418	0.271683	0.189697	0.512573	0.280823	0.341592
0.204055	0.0654337	0.04592	0.261722	0.0670103	0.072989	0.36108	0.264114	0.200135	0.482331	0.266857	0.303856
0.155626	0.0677674	0.028812	0.329493	0.0904916	0.116754	0.396237	0.159318	0.182386	0.640755	0.239547	0.46795
0.159403	0.0717446	0.0305565	0.262151	0.0704025	0.0736796	0.229306	0.14263	0.0729245	0.445747	0.2501	0.26124
0.126155	0.0647993	0.020114	0.244582	0.0679128	0.0644324	0.0986296	0.121251	0.0244295	0.33674	0.225418	0.164207
0.181088	0.064315	0.0369292	0.297458	0.0709993	0.093522	0.447004	0.248941	0.261785	0.622013	0.297908	0.475649
0.187852	0.0670163	0.0397797	0.335649	0.0924382	0.121205	0.505715	0.320521	0.358482	0.676961	0.301637	0.549261
0.194663	0.071221	0.0429661	0.288939	0.0696386	0.088335	0.541896	0.293688	0.379905	0.732818	0.28013	0.615495
0.133042	0.0663445	0.0221019	0.315763	0.0705012	0.104677	0.692871	0.313708	0.578483	0.802174	0.291362	0.728374
0.150007	0.0660159	0.0268603	0.405817	0.10121	0.174931	0.312114	0.288947	0.180905	0.451491	0.293643	0.290071
0.194132	0.0673685	0.0422257	0.214544	0.0673679	0.0505677	0.395962	0.259751	0.224256	0.541371	0.288286	0.376192
0.15851	0.0699189	0.0300139	0.238091	0.0689328	0.0614393	0.598352	0.288885	0.44148	0.695401	0.279577	0.561746
0.132687	0.0694907	0.0224348	0.341261	0.0816731	0.12313	0.243585	0.128048	0.0757298	0.460651	0.234368	0.267128
0.159413	0.0671645	0.0299234	0.314662	0.0821412	0.10576	0.143313	0.113146	0.0333406	0.659799	0.244303	0.495019
0.179359	0.066854	0.036639	0.275888	0.0720542	0.081306	0.240595	0.153322	0.0813937	0.44422	0.242496	0.256135
0.180383	0.0701178	0.0374546	0.515005	0.106503	0.276573	0.446109	0.259705	0.26646	0.639917	0.265826	0.480158
0.131394	0.0693116	0.0220684	0.327912	0.0694452	0.112349	0.476588	0.267714	0.298807	0.56625	0.2928	0.406371
0.10941	0.0680844	0.0166061	0.333347	0.0808602	0.117658	0.665695	0.312438	0.540767	0.880735	0.283184	0.855888
0.183229	0.0669452	0.0380544	0.314511	0.0810225	0.105482	0.468015	0.252686	0.282889	0.843305	0.286891	0.79347
0.152602	0.0704909	0.0282562	0.364494	0.0800537	0.139264	0.47015	0.27331	0.295739	0.69831	0.286054	0.569464
0.0907261	0.0687279	0.0129547	0.249224	0.0692296	0.0669055	0.508638	0.322856	0.362948	0.578287	0.332525	0.444988
0.147158	0.0682595	0.0263147	0.384918	0.0899216	0.156248	0.285689	0.29058	0.166055	0.498123	0.286083	0.32997
0.161986	0.0696569	0.0310915	0.372153	0.0926123	0.147075	0.156339	0.103822	0.0352208	0.46395	0.25007	0.277784
0.149039	0.0680597	0.0268448	0.278469	0.0687215	0.0822677	0.566914	0.288685	0.40473	0.863127	0.265782	0.815628
0.173475	0.0679173	0.0347062	0.335219	0.0924581	0.12092	0.357971	0.272615	0.202462	0.791567	0.266311	0.6975
0.159874	0.0688487	0.0302998	0.32944	0.0814215	0.11516	0.242357	0.15053	0.0813963	0.547111	0.258788	0.366301
0.209769	0.0673389	0.0485375	0.23799	0.0723794	0.061878	0.467186	0.26386	0.287884	0.848561	0.277345	0.796977
0.139885	0.0671227	0.0240734	0.317032	0.0831704	0.107427	0.692437	0.294795	0.566373	0.973014	0.267518	1.01832
0.140679	0.0672437	0.0243122	0.272921	0.0699859	0.0793842	0.420982	0.25209	0.240776	0.527411	0.282773	0.358123
0.152487	0.0676507	0.027829	0.349459	0.0895443	0.13014	0.31209	0.272257	0.171524	0.513548	0.253876	0.328184
0.188762	0.0681816	0.0402797	0.412557	0.101066	0.180418	0.172216	0.117646	0.0434991	0.277559	0.205327	0.119198
0.160287	0.0666496	0.0301341	0.318177	0.0809526	0.10779	0.247389	0.145604	0.0824018	0.33256	0.230465	0.16371
0.171405	0.0680829	0.0340149	0.303851	0.0824676	0.0991261	0.324189	0.270036	0.178018	0.626878	0.291111	0.477722
0.176516	0.0712145	0.0362294	0.350163	0.0897077	0.130662	0.315268	0.127872	0.115745	0.617691	0.243693	0.440928
0.191096	0.069619	0.0413646	0.299309	0.0783229	0.0957202	0.214349	0.114025	0.0589473	0.376977	0.283295	0.222367
0.144627	0.0673754	0.0254565	0.288019	0.0718488	0.0881171	0.458563	0.335701	0.322976	0.650391	0.302376	0.514439
0.236292	0.0689121	0.0605826	0.345867	0.0687863	0.124356	0.721353	0.310944	0.617037	0.821312	0.310406	0.770905
0.206837	0.0677317	0.0473693	0.336484	0.0888486	0.121115	0.54415	0.230304	0.349139	0.736313	0.291546	0.627156
0.189535	0.068184	0.0405724	0.365459	0.0819868	0.140282	0.601435	0.287561	0.444415	0.708629	0.30264	0.593746
0.164716	0.0661539	0.0315078	0.350159	0.0825294	0.129422	0.588622	0.333959	0.458005	0.671654	0.31277	0.548944
0.112074	0.0662648	0.0169516	0.216196	0.0693183	0.0515459	0.22399	0.137638	0.0691158	0.709262	0.24034	0.560816
0.171659	0.070884	0.0344914	0.348401	0.0883909	0.129196	0.500591	0.319833	0.352885	0.76913	0.295078	0.678631
0.179348	0.0669857	0.0366527	0.395641	0.0933919	0.165254	0.228328	0.150292	0.0747211	0.557564	0.212007	0.355824
0.173895	0.0687008	0.0349591	0.361203	0.092931	0.139104	0.280892	0.136204	0.097452	0.734814	0.270837	0.613304
0.204426	0.067077	0.0462893	0.242605	0.0813123	0.065469	0.303781	0.125957	0.108148	0.761481	0.256938	0.64587
0.21626	0.069758	0.0516347	0.3165	0.0819018	0.10688	0.398355	0.251999	0.22219	0.513827	0.286449	0.346072
0.18347	0.0684464	0.0383463	0.304084	0.0691533	0.0972494	0.136565	0.146849	0.0402146	0.480088	0.239868	0.28802
0.171052	0.0693712	0.0340713	0.389615	0.0823722	0.158585	0.366752	0.163264	0.161162	0.687692	0.243995	0.532454
0.190434	0.0672433	0.0407868	0.295807	0.0811778	0.0940919	0.706424	0.301614	0.590006	0.824731	0.285635	0.761769
0.181632	0.0665098	0.0374136	0.383387	0.093016	0.155637	0.155758	0.163922	0.0511309	0.537809	0.23994	0.34681
0.159182	0.067097	0.029841	0.337904	0.0780199	0.120266	0.592283	0.285149	0.432109	0.527134	0.314315	0.376664
0.137822	0.0682928	0.0236589	0.241852	0.0680059	0.0631172	0.458804	0.334162	0.322165	0.592238	0.304707	0.443592
0.20379	0.0676224	0.046103	0.328517	0.0695887	0.112766	0.445548	0.249909	0.260968	0.577936	0.304584	0.426781
0.202393	0.0676476	0.0455391	0.264413	0.0674864	0.0744684	0.409556	0.25575	0.233145	0.69907	0.25474	0.553592
0.148949	0.0681402	0.0268288	0.254555	0.0685029	0.0694909	0.529402	0.323129	0.384679	0.665234	0.323361	0.547099
0.154894	0.0680935	0.0286288	0.299149	0.0730229	0.0948224	0.172022	0.17763	0.061144	0.415964	0.237321	0.229347
0.185209	0.0684644	0.0389897	0.288343	0.0707254	0.0881436	0.110121	0.112407	0.024762	0.398933	0.213635	0.204788
0.144736	0.0671049	0.0254516	0.230053	0.0670423	0.0574192	0.413354	0.277635	0.247943	0.671301	0.259856	0.51817
0.156535	0.0684312	0.0291861	0.314425	0.0804695	0.105339	0.491996	0.255225	0.3072	0.723313	0.27608	0.599402
0.202884	0.0692124	0.0459521	0.321425	0.0805049	0.109795	0.489664	0.338782	0.354544	0.562429	0.322339	0.420229
0.164272	0.0687428	0.0317109	0.198189	0.0712686	0.0443582	0.341738	0.283638	0.197235	0.634582	0.279011	0.480542
0.188048	0.0671392	0.0398699	0.36967	0.0807337	0.143174	0.45938	0.266349	0.281972	0.817588	0.285971	0.750229
0.194543	0.0637936	0.0419167	0.341251	0.0798948	0.122835	0.346126	0.28074	0.198618	0.558669	0.274189	0.387291
0.16521	0.0706262	0.0322825	0.229387	0.0715332	0.0577354	0.129511	0.118101	0.0307209	0.492389	0.206554	0.285112
0.212049	0.0669715	0.0494501	0.345616	0.0814145	0.126079	0.118078	0.155249	0.0380447	0.243561	0.225316	0.110089
0.174272	0.0649495	0.034589	0.361641	0.092982	0.13943	0.446519	0.242363	0.258119	0.734118	0.263926	0.608586
0.214887	0.0672462	0.0506985	0.308243	0.0809994	0.101575	0.178275	0.135269	0.0500798	0.434842	0.218181	0.236691
0.146305	0.0704247	0.0263648	0.286593	0.0696595	0.0869882	0.311538	0.158552	0.122195	0.712676	0.270614	0.581139
0.194367	0.0691992	0.0425672	0.277017	0.0708858	0.0817632	0.702921	0.307557	0.588689	0.694747	0.309185	0.578268
0.175955	0.0659275	0.0353067	0.373779	0.0877568	0.147412	0.698963	0.345765	0.608103	0.791706	0.321479	0.730147
0.195353	0.0658309	0.0424966	0.36621	0.0838756	0.141145	0.400766	0.132792	0.178247	0.820145	0.224018	0.722822
0.194788	0.0664516	0.0423582	0.303162	0.074673	0.097483	0.286959	0.286688	0.164535	0.475211	0.280816	0.304684
0.170352	0.0702337	0.0339527	0.421371	0.0899579	0.185646	0.208051	0.116157	0.0567774	0.665467	0.227248	0.494487
0.205211	0.0678938	0.046721	0.273631	0.0704847	0.0798419	0.161148	0.119146	0.0401644	0.644637	0.248191	0.477156
0.154896	0.0634226	0.0280151	0.256592	0.0676034	0.0704099	0.489225	0.275813	0.315415	0.701523	0.284587	0.573124
0.154314	0.0681118	0.0284521	0.342429	0.0928567	0.12588	0.574927	0.298047	0.419373	0.631643	0.311457	0.495979
0.210509	0.0655	0.0486044	0.429063	0.0993593	0.193967	0.32155	0.146425	0.124834	0.307694	0.258085	0.161284
0.154355	0.0689113	0.0285743	0.274817	0.0672091	0.0800416	0.270168	0.149654	0.0953871	0.96781	0.273993	1.01173
0.182978	0.0688924	0.0382271	0.318422	0.0831456	0.108306	0.19814	0.143236	0.0597762	0.632962	0.267749	0.472331
0.187177	0.0668833	0.0395084	0.382698	0.0988321	0.156226	0.569023	0.346941	0.444155	0.725506	0.318171	0.627591
[truncated: 8,004 more rows]

## Sheet: Fig 3B
Fig 3B Data
Light excitation (ms)	Elongation rates (min-1)	Age (New=1,Old=0)
70	0.0299121	NA
70	0.0276233	0
70	0.0277806	0
70	0.0283445	0
70	0.0297757	0
70	0.0282134	0
70	0.0297121	0
70	0.0265222	0
70	0.0257472	0
70	0.028767	0
70	0.0296234	0
70	0.0312445	0
70	0.0310142	0
70	0.0297101	0
70	0.0299811	0
70	0.0284328	0
70	0.0290628	0
70	0.0280342	0
70	0.0278192	0
70	0.0267448	0
70	0.0254341	0
70	0.0343695	1
70	0.0321364	1
70	0.034764	1
70	0.0369889	1
70	0.0311076	1
70	0.0327441	1
70	0.0316446	1
70	0.0348112	1
70	0.0351315	1
70	0.0323391	1
70	0.032883	1
70	0.0318181	1
70	0.0327992	1
70	0.0338666	1
70	0.0290656	1
70	0.0306741	1
70	0.033138	1
70	0.031822	1
70	0.0321878	1
70	0.0377264	1
70	0.0336938	1
70	0.0322477	1
70	0.0345939	1
70	0.032603	1
70	0.0332325	1
70	0.0323429	NA
70	0.0314969	0
70	0.0308023	0
70	0.0310281	0
70	0.0286258	0
70	0.0311292	0
70	0.0326349	0
70	0.0312299	0
70	0.0352651	0
70	0.0327625	0
70	0.0348152	0
70	0.0297931	0
70	0.0289132	0
70	0.0288633	0
70	0.0262162	0
70	0.030719	0
70	0.0281619	0
70	0.0280008	0
70	0.0303632	0
70	0.0307247	0
70	0.033011	0
70	0.0291103	0
70	0.0278075	0
70	0.0315006	0
70	0.0316517	0
70	0.0325391	0
70	0.0296777	0
70	0.0290524	0
70	0.0269067	0
70	0.0278114	0
70	0.0303869	0
70	0.0296958	0
70	0.0297925	0
70	0.030097	0
70	0.0305231	0
70	0.0292417	0
70	0.0261498	0
70	0.0342815	1
70	0.032956	1
70	0.0352786	1
70	0.0322365	1
70	0.0349677	1
70	0.0340001	1
70	0.0353824	1
70	0.0306969	1
70	0.0317483	1
70	0.0338344	1
70	0.032289	1
70	0.0325495	1
70	0.0323359	1
70	0.0302104	1
70	0.0348495	1
70	0.0350884	1
70	0.0327148	1
70	0.0354668	1
70	0.0300937	1
70	0.034553	1
70	0.0335006	1
70	0.0336615	1
70	0.0319295	1
70	0.0323206	1
70	0.0309439	1
70	0.0299714	1
70	0.0339052	1
70	0.0314129	1
70	0.0353426	1
70	0.0331093	1
70	0.033769	1
70	0.033563	1
70	0.0335194	1
70	0.0320972	1
70	0.0310517	1
70	0.0327314	1
70	0.0355737	1
70	0.0296945	1
70	0.0355567	1
70	0.0317608	1
70	0.0329246	1
70	0.0341162	1
70	0.0331593	1
70	0.0323077	1
70	0.031785	1
70	0.0334203	1
70	0.0325591	1
70	0.0309138	1
70	0.0338634	1
70	0.0290731	1
70	0.0326419	1
70	0.0339667	1
70	0.0355893	1
70	0.0360154	1
70	0.0341632	1
70	0.0313285	1
70	0.032839	1
70	0.0323952	1
70	0.0342066	1
70	0.0350839	1
70	0.0319331	0
70	0.0345014	1
70	0.0335373	1
70	0.0330719	1
70	0.0353387	NA
70	0.0348277	NA
70	0.0285659	NA
70	0.0319873	NA
70	0.0319532	NA
70	0.0277249	0
70	0.0341795	1
70	0.0328737	1
70	0.0324032	1
70	0.0301509	0
70	0.0306507	1
70	0.0283935	0
70	0.0286176	1
70	0.032437	0
70	0.0282959	1
70	0.0284789	0
70	0.0284774	1
70	0.0302947	1
70	0.0295882	1
70	0.0340643	0
70	0.031433	1
70	0.0325467	0
70	0.0315174	1
70	0.0320455	1
70	0.0314884	1
70	0.0313339	0
70	0.0332376	0
70	0.0332106	1
70	0.0366668	1
70	0.0359464	0
70	0.0304513	0
70	0.0356313	1
70	0.0274742	0
70	0.0338731	1
70	0.0327046	1
70	0.0255825	0
70	0.0265543	1
70	0.0292964	0
70	0.0283236	1
70	0.0311625	1
70	0.0329257	0
70	0.0319201	0
70	0.0287544	1
70	0.0302335	1
70	0.0302457	0
70	0.0300223	1
70	0.0321841	0
70	0.0324525	1
70	0.0335629	0
70	0.032891	1
70	0.0352797	1
70	0.0307048	0
70	0.0342365	1
70	0.0337562	0
70	0.0309991	0
70	0.0309547	1
70	0.029253	0
70	0.0298024	1
70	0.0297928	1
70	0.0302719	0
70	0.0313145	1
70	0.0332366	0
70	0.0327274	0
70	0.0318328	1
70	0.0299599	0
70	0.0302635	1
70	0.0302783	1
70	0.0297153	0
70	0.0294254	1
70	0.0311567	0
70	0.0330441	0
70	0.0306571	1
70	0.0340794	0
70	0.0344767	1
70	0.0327199	1
70	0.0327573	1
70	0.03314	0
70	0.0317486	1
70	0.0350921	1
70	0.0344955	0
70	0.0342206	1
70	0.0324368	0
70	0.0352077	1
70	0.0348103	1
70	0.0264316	0
70	0.0309445	1
70	0.0315971	1
70	0.0276488	0
70	0.0292825	1
70	0.0258856	1
70	0.0226884	0
70	0.0252913	1
70	0.0297862	0
70	0.0276962	1
70	0.0286564	1
70	0.0305243	0
70	0.0296418	1
70	0.0296933	0
70	0.0308044	1
70	0.03291	1
70	0.031262	0
70	0.030971	1
70	0.0324603	1
70	0.0294385	0
70	0.0328566	1
70	0.0328366	0
70	0.0329431	1
70	0.0330704	1
70	0.0331782	1
70	0.0297066	0
70	0.0321348	1
70	0.0300143	0
70	0.0318077	1
70	0.032503	1
70	0.0354529	1
70	0.032448	0
70	0.0296983	0
70	0.0307691	1
70	0.0332327	1
70	0.0259221	0
70	0.0303955	1
70	0.0310284	1
70	0.0299543	0
70	0.0333792	1
70	0.0321279	0
70	0.0337536	1
70	0.0313081	1
70	0.0339811	1
70	0.0327004	0
70	0.0351922	1
70	0.0318395	1
70	0.031693	0
70	0.0338487	1
70	0.0314443	0
70	0.0314654	1
70	0.0323544	1
70	0.0326774	0
70	0.0320091	1
70	0.0306166	1
70	0.0303982	0
70	0.0316998	1
70	0.0286518	0
70	0.0312124	1
70	0.0288768	0
70	0.0301808	1
70	0.0332418	1
70	0.0292744	0
70	0.0324563	1
70	0.0327109	1
70	0.0297903	0
70	0.0315268	1
70	0.0283539	1
70	0.0281862	0
70	0.0291888	1
70	0.0302352	0
70	0.0333837	1
70	0.0344351	1
70	0.0294897	1
70	0.0328492	0
70	0.0331762	0
70	0.0306419	1
70	0.0321335	0
70	0.0331234	1
70	0.0296813	0
70	0.0286318	1
70	0.0317831	1
70	0.0309113	1
70	0.0298847	0
70	0.0298904	1
70	0.0297509	0
70	0.0292189	1
70	0.0326661	1
70	0.0293449	0
70	0.030777	1
70	0.0322396	1
70	0.0349552	1
70	0.0311704	0
70	0.0319843	1
70	0.0330574	0
70	0.032341	1
70	0.0308545	0
70	0.033412	1
70	0.0322387	0
70	0.0349794	1
70	0.0341239	1
70	0.0271949	NA
70	0.0301538	0
70	0.0321297	0
70	0.0251437	0
70	0.028244	0
70	0.0279827	0
70	0.0292894	0
70	0.0342574	0
70	0.0273972	0
70	0.0276072	0
70	0.0296288	0
70	0.0249329	0
70	0.0254926	0
70	0.0320932	0
70	0.0259498	0
70	0.0289912	0
70	0.0334909	0
70	0.0271208	0
70	0.0289157	0
70	0.0296703	0
70	0.0340097	0
70	0.0326887	0
70	0.0323777	0
70	0.0327517	0
70	0.0314869	0
70	0.029124	0
70	0.0270219	0
70	0.0312257	0
70	0.0299955	0
70	0.0294618	0
70	0.0283299	0
70	0.0323637	0
70	0.0301086	0
70	0.0283136	0
70	0.0306112	0
70	0.0328413	0
70	0.0300388	0
70	0.0322142	0
70	0.0317412	0
70	0.0282512	0
70	0.0355237	0
70	0.0328299	0
70	0.0290144	0
70	0.0285934	0
70	0.0301493	0
70	0.0314015	0
70	0.030169	0
70	0.0293523	0
70	0.0268462	0
70	0.0302854	0
70	0.0290097	0
70	0.0305905	0
70	0.0333346	0
70	0.0323863	0
70	0.0287598	0
70	0.0276126	0
70	0.0294841	0
70	0.0307456	0
70	0.0318705	1
70	0.0328871	1
70	0.028387	1
70	0.0291532	1
70	0.0323692	1
70	0.0302227	1
70	0.0306375	1
70	0.0299144	1
70	0.0352638	1
70	0.0333927	1
70	0.0329816	1
70	0.0339745	1
70	0.0336646	0
70	0.0340067	1
70	0.032882	1
70	0.0311677	1
70	0.0350603	1
70	0.0327187	1
70	0.033949	1
70	0.0317953	1
70	0.0339228	1
70	0.0359467	1
70	0.0322639	1
70	0.0317858	1
70	0.0339569	1
70	0.0331871	1
70	0.0312204	1
70	0.0322556	1
70	0.0344543	1
70	0.0316029	1
70	0.034332	1
70	0.0313047	1
70	0.029785	1
70	0.0340004	1
70	0.035575	1
70	0.0326399	1
70	0.0355732	0
70	0.0359004	1
70	0.0341489	1
70	0.0335804	1
70	0.0318661	1
70	0.0324487	1
70	0.0323648	1
70	0.0324787	1
70	0.030531	1
70	0.0325977	1
70	0.0356108	1
70	0.032946	1
70	0.0353432	1
70	0.0318098	1
70	0.0339981	1
70	0.0358765	1
70	0.0337775	1
70	0.032184	1
70	0.0339933	1
70	0.0321276	1
70	0.0327022	1
70	0.0328844	1
70	0.0296903	1
70	0.033472	1
70	0.0285888	1
70	0.0339008	1
70	0.0307933	1
70	0.0339269	1
70	0.0324109	1
70	0.0327845	1
70	0.0337654	1
70	0.0329866	0
70	0.0348691	1
70	0.0292904	1
70	0.0326505	1
70	0.030659	1
70	0.0307366	0
70	0.0299014	1
70	0.030829	1
70	0.030589	1
70	0.0286129	1
70	0.0308939	1
70	0.0323897	1
70	0.0302465	0
70	0.030807	1
70	0.0342306	1
70	0.0358821	1
70	0.0302325	1
70	0.0300469	0
70	0.0295799	1
70	0.0322337	1
70	0.031901	1
70	0.0331012	1
70	0.0298447	1
70	0.0329385	1
70	0.0284275	1
70	0.0286112	1
70	0.033439	1
70	0.0313712	NA
70	0.0270774	0
70	0.030464	0
70	0.0292949	0
70	0.0279194	0
70	0.0290435	0
70	0.0306905	0
70	0.0304334	0
70	0.0281243	0
70	0.0282611	0
70	0.028437	0
70	0.0312293	0
70	0.0282201	0
70	0.0313888	0
70	0.0261232	0
70	0.0311003	0
70	0.0289403	0
70	0.0278269	0
70	0.0281403	0
70	0.0309174	0
70	0.0296484	0
70	0.0283606	0
70	0.0307846	0
70	0.0272457	0
70	0.027381	0
70	0.0275848	0
70	0.0280735	0
70	0.0263471	0
70	0.0282564	0
70	0.0292077	0
70	0.0256572	0
70	0.0282895	0
70	0.0283233	0
70	0.0283844	0
70	0.0313829	0
70	0.0309195	0
70	0.0259773	0
70	0.0316136	0
70	0.0286898	0
70	0.0282061	0
70	0.0268653	0
70	0.027469	0
70	0.0304426	0
70	0.0286783	0
70	0.0311934	0
70	0.0312111	0
70	0.0272669	0
70	0.0256384	0
70	0.0123325	0
70	0.0151027	0
70	0.0138724	1
70	0.0171051	1
70	0.0222437	0
70	0.0306847	0
70	0.0253433	0
70	0.023084	1
70	0.034463	1
70	0.0350271	1
70	0.0337006	1
70	0.0340333	1
70	0.0295011	1
70	0.0314178	1
70	0.0352363	1
70	0.0297693	1
70	0.0317675	1
70	0.031066	1
70	0.0343949	1
70	0.0340331	1
70	0.0352559	1
70	0.0309808	1
70	0.0309315	1
70	0.0325126	1
70	0.0339632	1
70	0.031291	1
70	0.0313776	1
70	0.0314479	1
70	0.0318554	1
70	0.0354023	1
70	0.0338521	1
70	0.0333288	1
70	0.0368919	1
70	0.0335139	1
70	0.0326522	1
70	0.031344	1
70	0.0304182	1
70	0.0317321	0
70	0.0321519	1
70	0.0342805	1
70	0.0316934	1
70	0.031898	1
70	0.0331662	1
70	0.0340216	1
70	0.0322766	0
70	0.0360188	1
70	0.030718	1
70	0.0319082	1
70	0.0353631	1
70	0.0355931	1
70	0.0310644	1
70	0.033644	1
70	0.0331984	1
70	0.0346799	1
70	0.0311834	1
70	0.0360433	1
70	0.0328449	1
70	0.0335146	0
70	0.0374988	1
70	0.0331206	1
70	0.0309987	1
70	0.0324819	1
70	0.0333354	1
70	0.0345924	1
70	0.0349862	1
70	0.0345725	1
70	0.0339849	1
70	0.0327736	1
70	0.0309122	0
70	0.0351846	1
70	0.0320079	1
70	0.0346656	1
70	0.0321764	1
70	0.0333996	1
70	0.0380073	1
70	0.0339874	1
70	0.0336006	1
70	0.0315219	1
70	0.0313367	0
70	0.0355066	1
70	0.0335295	1
70	0.0344497	1
70	0.0324502	1
70	0.0343487	1
70	0.0328082	NA
70	0.0305088	0
70	0.0307503	0
70	0.0302721	0
70	0.0320401	0
70	0.0290222	0
70	0.0313639	0
70	0.035817	0
70	0.0326179	0
70	0.0339644	0
70	0.0359325	0
70	0.0321313	0
70	0.0317815	0
70	0.0292933	0
70	0.0327863	0
70	0.0323592	0
70	0.0316389	0
70	0.0314394	0
70	0.0312347	0
70	0.0312964	0
70	0.0301945	0
70	0.0339149	0
70	0.0324278	0
70	0.0302723	0
70	0.0357163	0
70	0.0299739	0
70	0.0337221	0
70	0.0379967	0
70	0.0303579	0
70	0.0297251	0
70	0.0288685	0
70	0.0278646	0
70	0.0297483	0
70	0.032073	0
70	0.0330574	0
70	0.0273183	0
70	0.0320079	0
70	0.0377275	0
70	0.0354698	0
70	0.0334544	0
70	0.0268309	0
70	0.0273048	0
70	0.0271101	0
70	0.0262463	0
70	0.0308467	0
70	0.0278525	0
70	0.0311084	0
70	0.0267006	0
70	0.029708	0
70	0.0286249	0
70	0.0272854	0
70	0.0297916	0
70	0.0282662	0
70	0.0308321	0
70	0.030728	0
70	0.0301801	0
70	0.0320462	0
70	0.0303597	0
70	0.0286772	0
70	0.0313562	0
70	0.031973	0
70	0.0323294	1
70	0.0369594	1
70	0.0322793	1
70	0.0365002	1
70	0.0291427	0
70	0.0300602	1
70	0.0323102	1
70	0.0310757	1
70	0.0309377	1
70	0.0336103	1
70	0.0316159	1
70	0.0320898	1
70	0.0328517	1
70	0.0323316	1
70	0.0350514	1
70	0.0322105	1
70	0.0344905	1
70	0.0333414	1
70	0.0287887	0
70	0.0346542	1
70	0.0349253	1
70	0.0320966	0
70	0.033105	1
70	0.0306249	1
70	0.0313467	1
70	0.0326608	1
70	0.0339145	1
70	0.0334646	1
70	0.0323849	1
70	0.0364012	0
70	0.0344862	1
70	0.0306716	1
70	0.0303094	1
70	0.0316055	1
70	0.0307908	1
70	0.0311514	0
70	0.0323693	1
70	0.034197	1
70	0.0314923	1
70	0.0356559	1
70	0.0345405	1
70	0.0358972	1
70	0.0356691	1
70	0.0324813	1
70	0.0332908	1
70	0.0306492	0
70	0.0326005	1
70	0.0347097	1
70	0.0323075	0
70	0.0323942	1
70	0.0327479	1
70	0.0313047	1
70	0.0342336	1
70	0.0349018	1
70	0.0356924	1
70	0.0347981	1
70	0.0298929	1
70	0.0326368	1
70	0.0293051	1
70	0.0292296	0
70	0.0289497	1
70	0.0286297	1
70	0.0321859	0
70	0.0299889	1
70	0.0298359	1
70	0.0332117	1
70	0.0330056	1
70	0.0316609	1
70	0.0326185	1
70	0.0348345	1
70	0.0298219	1
70	0.0343144	1
70	0.0340807	1
70	0.0332025	1
70	0.0343917	1
70	0.0314688	1
70	0.0312954	1
70	0.0290164	1
70	0.0362419	1
70	0.0322124	1
70	0.0318397	1
70	0.0320598	1
70	0.031709	1
70	0.0370533	1
70	0.0369159	1
70	0.0333107	1
70	0.0340514	1
70	0.0305088	1
70	0.0341461	1
70	0.0341708	1
70	0.0359921	1
70	0.0338313	1
70	0.0350429	1
70	0.0317436	1
70	0.0310206	1
70	0.032865	1
70	0.031263	1
70	0.0318569	1
70	0.0335482	1
70	0.0337181	1
70	0.0319633	1
70	0.0320503	1
70	0.033347	1
70	0.0305737	1
70	0.0320317	1
70	0.0335045	1
70	0.0345384	1
70	0.0336526	1
70	0.0326675	1
70	0.033903	1
70	0.0332483	1
70	0.0320332	1
70	0.0312931	1
70	0.0317047	0
70	0.0350059	1
70	0.0353104	1
70	0.0316793	1
70	0.0317128	1
70	0.0329604	0
70	0.0340842	1
70	0.0321071	1
70	0.0345126	1
70	0.0333546	1
70	0.0361453	1
70	0.0323177	1
70	0.0348056	1
70	0.0311078	1
70	0.0358746	1
70	0.0308505	1
70	0.0352706	0
70	0.0341135	0
70	0.0339592	0
70	0.0329831	0
700	0.0274222	NA
700	0.0307932	0
700	0.0281783	0
700	0.0264968	0
700	0.0275514	0
700	0.0259493	0
700	0.0284393	0
700	0.0300469	0
700	0.0258412	0
700	0.0257894	0
700	0.0286681	0
700	0.0259637	0
700	0.0262314	0
700	0.0270197	0
700	0.029126	0
700	0.0272952	0
700	0.0273886	0
700	0.0267834	0
700	0.0248786	0
700	0.0288172	0
700	0.0255264	0
700	0.0273224	0
700	0.0270439	0
700	0.0259375	0
700	0.0263274	0
700	0.02696	0
700	0.0290991	1
700	0.0305106	1
700	0.030752	1
700	0.0321562	1
700	0.0311081	1
700	0.0288729	1
700	0.0278142	1
700	0.0295184	1
700	0.0298044	1
700	0.0294698	1
700	0.0312635	1
700	0.0315612	1
700	0.0318359	1
700	0.0302975	1
700	0.0324083	1
700	0.0313855	1
700	0.029624	1
700	0.0300714	NA
700	0.0273842	0
700	0.0294542	0
700	0.0287464	0
700	0.0323308	0
700	0.0277806	0
700	0.0203451	0
700	0.0306491	0
700	0.0324305	0
700	0.0305924	0
700	0.0249494	0
700	0.0277621	0
700	0.029673	0
700	0.0271533	0
700	0.0283353	0
700	0.0333984	1
700	0.0321349	1
700	0.0312349	1
700	0.0299336	1
700	0.0298203	1
700	0.0308058	1
700	0.0308409	1
700	0.0279151	1
700	0.0301412	1
700	0.0293738	1
700	0.0326553	1
700	NA	NA
700	0.0340131	NA
700	0.0284292	NA
700	0.0309949	NA
700	0.0352494	1
700	0.0277485	0
700	0.0314153	1
700	0.027431	0
700	0.0292787	1
700	0.026892	0
700	0.027335	0
700	0.0294482	0
700	0.0293096	1
700	0.0309192	1
700	0.0276596	0
700	0.0319337	1
700	0.0284742	0
700	0.0309384	1
700	0.0284945	0
700	0.032301	1
700	0.0261227	0
700	0.0290482	1
700	0.0264706	0
700	0.025235	0
700	0.0297885	1
700	0.027836	0
700	0.0263864	0
700	0.0291112	1
700	0.0320772	0
700	0.0318234	1
700	0.0264901	0
700	0.0284262	1
700	0.0331551	1
700	0.0278018	0
700	0.0330919	1
700	0.0264773	0
700	0.0287713	1
700	0.0295561	0
700	0.030004	1
700	0.0330602	0
700	0.0321637	1
700	0.0278192	0
700	0.0295425	1
700	0.028639	0
700	0.0276209	1
700	0.0293174	0
700	0.0297722	1
700	0.0294916	0
700	0.030284	1
700	0.0311868	0
700	0.0314481	1
700	0.0261789	0
700	0.0308492	1
700	0.025735	1
700	0.0246162	0
700	0.0298456	1
700	0.0236388	0
700	0.0282248	0
700	0.0305178	1
700	0.0271635	0
700	0.0313662	1
700	0.0328959	1
700	0.0284461	0
700	0.0304956	1
700	0.0294349	1
700	0.0336817	0
700	NA	0
700	0.0289458	0
700	0.0251886	0
700	0.0290024	1
700	0.0266868	0
700	0.0301913	1
700	0.0261922	0
700	0.0323584	1
700	0.0320932	1
700	0.0272557	0
700	0.0326384	1
700	0.0311728	1
700	0.0264893	0
700	0.0301218	1
700	0.0266135	0
700	0.0293116	1
700	0.0332297	1
700	0.0261722	0
700	0.0298883	1
700	0.0278531	0
700	0.0292378	1
700	0.0352715	1
700	0.0269829	0
700	0.0261024	0
700	0.0299993	1
700	0.0280456	0
700	0.0290699	1
700	0.0238705	0
700	0.0319561	1
700	0.0268021	0
700	0.0338234	1
700	0.0220487	0
700	0.02997	1
700	0.0257461	0
700	0.0308243	1
700	0.032187	1
700	0.0322024	0
700	0.0329577	1
700	0.0278447	1
700	0.0274557	0
700	0.0290621	1
700	0.0310695	1
700	0.0297628	0
700	0.0249252	0
700	0.025246	0
700	0.0281588	1
700	0.0278922	0
700	0.030895	1
700	0.0270998	0
700	0.0305969	1
700	0.0248709	0
700	0.0256393	0
700	0.0278141	1
700	0.0262179	0
700	0.033788	1
700	0.0310833	1
700	0.0299718	NA
700	0.0298452	0
700	0.0274879	0
700	0.027346	0
700	0.0289363	0
700	0.0290452	0
700	0.0332513	0
700	0.0307523	0
700	0.0273719	0
700	0.026152	0
700	0.0276364	0
700	0.028716	0
700	0.0271612	0
700	0.0273923	0
700	0.0254194	0
700	0.0235594	0
700	0.0239148	0
700	0.0300274	0
700	0.0313501	0
700	0.0282769	0
700	0.0291824	0
700	0.0294156	0
700	0.0279466	0
700	0.0318012	0
700	0.0319781	0
700	0.0300705	0
700	0.0315924	0
700	0.0246155	0
700	0.0273758	0
700	0.024847	0
700	0.0304768	0
700	0.0281997	0
700	0.0281966	0
700	0.0294146	0
700	0.0279825	0
700	0.0255516	0
700	0.0246335	0
700	0.0263097	0
700	0.0291404	0
700	0.032079	0
700	0.0266436	0
700	0.0299094	0
700	0.0286709	0
700	0.0262748	0
700	0.0277783	0
700	0.0294331	0
700	0.0328548	0
700	0.0304316	1
700	0.0329034	1
700	0.0343188	1
700	0.0301441	1
700	0.0325422	1
700	0.0320556	1
700	0.0335574	1
700	0.0302072	1
700	0.0290046	1
700	0.0320539	1
700	0.0281716	1
700	0.0290998	1
700	0.030663	1
700	0.0316622	1
700	0.0327401	1
700	0.0289709	1
700	0.0283486	1
700	0.0289487	1
700	0.0341107	1
700	0.0326116	1
700	0.029497	1
700	0.0307919	1
700	0.0330405	1
700	0.0316594	1
700	0.0305905	1
700	0.0307799	1
700	0.0299514	1
700	0.033156	1
700	0.0279641	1
700	0.0256986	1
700	0.0274288	1
700	0.0306699	1
700	0.0308184	1
700	0.0316637	1
700	0.0317654	1
700	0.031392	1
700	0.0319382	1
700	0.0300651	1
700	0.0322875	1
700	0.0301602	1
700	0.0307102	1
700	0.0306602	1
700	0.0322598	1
700	0.031023	1
700	0.0308527	NA
700	0.0283756	0
700	0.0268396	0
700	0.026192	0
700	0.0267539	0
700	0.0277771	0
700	0.0301291	0
700	0.0321805	0
700	0.0309599	0
700	0.0293619	0
700	0.0268996	0
700	0.0246156	0
700	0.0279535	0
700	0.0244514	0
700	0.0279538	0
700	0.0284699	0
700	0.0286388	0
700	0.0242177	0
700	0.0279129	0
700	0.0258582	0
700	0.0250662	0
700	0.0283306	0
700	0.0268691	0
700	0.0266966	0
700	0.0296678	0
700	0.0259874	0
700	0.0283951	0
700	0.0285109	0
700	0.0274458	0
700	0.025884	0
700	0.0263017	0
700	0.0309229	0
700	0.0233417	0
700	0.0253076	0
700	0.0290617	0
700	0.0243716	0
700	0.0265407	0
700	0.0297421	0
700	0.0277982	0
700	0.0276163	0
700	0.0249459	0
700	0.0281054	1
700	0.0313178	1
700	0.0284829	1
700	0.0306752	1
700	0.0316252	1
700	0.031717	1
700	0.0324931	1
700	0.0301186	1
700	0.0318364	1
700	0.031065	1
700	0.0348598	1
700	0.0318274	1
700	0.0302074	1
700	0.028384	1
700	0.0306618	1
700	0.0286375	1
700	0.0324636	1
700	0.0303984	1
700	0.0268501	1
700	0.0289008	1
700	0.0320899	1
700	0.0279203	1
700	0.0320006	1
700	0.0322673	1
700	0.0310662	1
700	0.0330939	1
700	0.029767	1
700	0.033088	1
700	0.0320489	1
700	0.0310019	1
700	0.0279984	NA
700	0.0311429	0
700	0.0278667	0
700	0.029175	0
700	0.0262517	0
700	0.0267642	0
700	0.0276573	0
700	0.0265025	0
700	0.028903	0
700	0.0282846	0
700	0.0256916	0
700	0.0274435	0
700	0.0303385	0
700	0.0293463	0
700	0.0295044	0
700	0.0266303	0
700	0.0275666	0
700	0.0296446	0
700	0.0272949	0
700	0.0310202	0
700	0.0288483	0
700	0.0278668	0
700	0.0273953	0
700	0.0249568	0
700	0.0297411	0
700	0.02799	0
700	0.0303548	0
700	0.0279611	0
700	0.0299173	0
700	0.0294376	0
700	0.0305654	0
700	0.0257722	0
700	0.0268999	0
700	0.0302211	0
700	0.0278395	0
700	0.0284507	0
700	0.0292731	0
700	0.02979	0
700	0.0293256	0
700	0.0290256	0
700	0.0273078	0
700	0.0263458	0
700	0.0267248	0
700	0.0233678	0
700	0.02741	0
700	0.0301561	0
700	0.0244888	0
700	0.0254848	0
700	0.0269079	0
700	0.0247504	0
700	0.0241292	0
700	0.0261834	0
700	0.0317189	1
700	0.0310314	1
700	0.029053	1
700	0.0276827	1
700	0.029953	1
700	0.0290312	1
700	0.0317916	1
700	0.0307195	1
700	0.0315081	1
700	0.0291868	1
700	0.0316621	1
700	0.0320137	1
700	0.0303691	1
700	0.0314511	1
700	0.0344234	1
700	0.0311236	1
700	0.0307244	1
700	0.0297664	1
700	0.032901	1
700	0.0301822	1
700	0.0320542	1
700	0.031249	1
700	0.0303438	1
700	0.0331592	1
700	0.0293077	1
700	0.0297081	1
700	0.0323708	1
700	0.0309936	1
700	0.0313661	1
700	0.030081	1
700	0.0264986	1
700	0.0306537	1
700	0.0314083	1
700	0.0298447	1
700	0.0291585	1
700	0.028857	1
700	0.031024	1
700	0.0303034	1
700	0.0301476	1
700	0.0304015	1
700	0.0309886	1
700	0.0289065	1
700	0.0303196	1
700	0.0297858	1
700	0.0294233	1
700	0.0321164	1
700	0.029826	1
700	0.0312263	1
700	0.0314558	NA
700	0.0302469	0
700	0.0266559	0
700	0.030081	0
700	0.0318933	0
700	0.0260424	0
700	0.0283571	0
700	0.0303934	0
700	0.0305227	0
700	0.0289766	0
700	0.0315236	0
700	0.0282664	0
700	0.0303813	0
700	0.0294957	0
700	0.0236583	0
700	0.0228452	0
700	0.0239295	0
700	0.0247423	0
700	0.0234462	0
700	0.0282427	0
700	0.0319157	0
700	0.0300441	0
700	0.027726	0
700	0.0277286	0
700	0.0288171	0
700	0.0266247	0
700	0.0286112	0
700	0.0250766	0
700	0.0286623	0
700	0.0265277	0
700	0.0308296	0
700	0.0274131	0
700	0.0297976	0
700	0.0277446	0
700	0.026969	0
700	0.0272543	0
700	0.0282078	0
700	0.0307705	0
700	0.0176894	0
700	0.027846	0
700	0.0265372	0
700	0.024734	0
700	0.0276341	0
700	0.0305958	0
700	0.0280265	0
700	0.0292293	0
700	0.0306902	0
700	0.0320163	0
700	0.0312353	0
700	0.0298286	0
700	0.0257524	0
700	0.0278502	0
700	0.0311415	0
700	0.0275079	0
700	0.0283981	0
700	0.0273942	0
700	0.0258481	0
700	0.0221478	0
700	0.032936	1
700	0.0297314	1
700	0.0324839	1
700	0.030483	1
700	0.0298881	1
700	0.0286926	1
700	0.0303802	1
700	0.029558	1
700	0.0307579	1
700	0.0299914	1
700	0.0334984	1
700	0.0303513	1
700	0.0322586	1
700	0.0315999	1
700	0.0298559	1
700	0.0312433	1
700	0.0297449	1
700	0.0319906	1
700	0.0333837	1
700	0.0318883	1
700	0.0328105	1
700	0.0319921	1
700	0.0290751	1
700	0.0286756	1
700	0.0319672	1
700	0.028929	1
700	0.0293586	1
700	0.0288271	1
700	0.0303533	1
700	0.0306313	1
700	0.0305509	1
700	0.0287383	1
700	0.0299966	1
700	0.029429	1
700	0.0309937	1
700	0.0301783	1
700	0.0274996	1
700	0.0283616	1
700	0.0307412	1
700	0.0302229	1
700	0.0308796	1
700	0.0315444	1
700	0.0276257	1
700	0.0291554	1
700	0.0290628	1
700	0.0290207	1
700	0.0284471	1
700	0.0309726	1
700	0.0303873	1
700	0.0273124	1
700	0.0257458	1
700	0.0238083	1
700	0.0250243	1
700	0.0261599	1
700	0.0246853	1
700	0.0299616	1
700	0.0307208	1
700	0.0290406	1
700	0.0315355	1
700	0.0312437	1
700	0.0285437	1
700	0.0286106	1
700	0.0302076	1
700	0.0298885	1
700	0.0286999	1
700	0.03142	1
700	0.0319864	1
700	0.0302309	1
700	0.0321048	1
700	0.0260688	1
700	0.0273835	1
700	0.0325098	NA
700	0.0289414	0
700	0.0296136	0
700	0.0269911	0
700	0.0280057	0
700	0.0311649	0
700	0.027998	0
700	0.027948	0
700	0.0321621	0
700	0.0298974	0
700	0.0262033	0
700	0.0297559	0
700	0.0295676	0
700	0.0289763	0
700	0.0312288	0
700	0.0266894	0
700	0.0252609	0
700	0.0260808	0
700	0.0296779	0
700	0.0270878	0
700	0.0245114	0
700	0.0286139	0
700	0.0287353	0
700	0.0270354	0
700	0.0292066	0
700	0.029515	0
700	0.0286698	0
700	0.0284494	0
700	0.0279398	0
700	0.0272251	0
700	0.0275205	0
700	0.030085	0
700	0.0301779	0
700	0.0280182	0
700	0.0303853	0
700	0.0285528	0
700	0.024919	0
700	0.0248317	0
700	0.0245334	0
700	0.0269466	0
700	0.028321	0
700	0.0288974	0
700	0.0277756	0
700	0.0306785	0
700	0.0280204	0
700	0.0283796	0
700	0.0261443	0
700	0.026565	0
700	0.0276509	0
700	0.0291187	1
700	0.0288708	1
700	0.033474	1
700	0.0291359	1
700	0.0316406	1
700	0.0314181	1
700	0.0279629	1
700	0.029369	1
700	0.0285071	1
700	0.0262286	1
700	0.0298807	1
700	0.0325561	1
700	0.03288	1
700	0.0324236	1
700	0.0310555	1
700	0.0327719	1
700	0.0288891	1
700	0.0311043	1
700	0.0314633	1
700	0.0303512	1
700	0.0323787	1
700	0.0290082	1
700	0.0295203	1
700	0.0326745	1
700	0.0290306	1
700	0.0325046	1
700	0.0286949	1
700	0.0277879	1
700	0.0280588	1
700	0.0291784	1
700	0.0315835	1
700	0.0288789	1
700	0.0303869	1
700	0.0293108	1
700	0.0289216	1
700	0.02876	1
700	0.0320138	1
700	0.02991	1
700	0.0314785	1
700	0.0312096	1
700	0.0290774	1
700	0.0312906	1
700	0.0331051	1
700	0.0303681	1
700	0.03412	1
700	0.0281849	NA
700	0.029308	0
700	0.0275236	0
700	0.0275837	0
700	0.0266595	0
700	0.0278053	0
700	0.0297927	0
700	0.0283233	0
700	0.0273438	0
700	0.0277459	0
700	0.0283741	0
700	0.0276188	0
700	0.0259229	0
700	0.0277306	0
700	0.0318789	0
700	0.028753	0
700	0.0253472	0
700	0.0285121	0
700	0.0286332	0
700	0.0293848	0
700	0.029252	0
700	0.0317982	0
700	0.0303298	0
700	0.0283067	0
700	0.0303731	0
700	0.0299066	0
700	0.028472	0
700	0.0267079	0
700	0.0298659	0
700	0.0303246	0
700	0.0341227	0
700	0.0280378	0
700	0.0278804	0
700	0.0279237	0
700	0.0268689	0
700	0.0281144	0
700	0.0301562	0
700	0.0283021	0
700	0.0283681	0
700	0.0288482	0
700	0.0312981	0
700	0.0280343	0
700	0.0313278	0
700	0.0274163	0
700	0.0259802	0
700	0.0272781	0
700	0.0283903	0
700	0.0289083	0
700	0.0289625	0
700	0.0289729	0
700	0.0233385	0
700	0.026162	0
700	0.0267126	0
700	0.0306705	0
700	0.0290702	0
700	0.0271675	0
700	0.0298857	0
700	0.0290123	0
700	0.0273356	0
700	0.0276948	0
700	0.0310436	1
700	0.0309213	1
700	0.0291601	1
700	0.0330959	1
700	0.0291647	1
700	0.0297909	1
700	0.0313523	1
700	0.0275673	1
700	0.0285463	1
700	0.0293745	1
700	0.0257636	1
700	0.0279706	1
700	0.0312878	1
700	0.0325969	1
700	0.0311284	1
700	0.0337328	1
700	0.0292852	1
700	0.0298693	1
700	0.0304995	1
700	0.0304745	1
700	0.0274051	1
700	0.0296581	1
700	0.0342247	1
700	0.0344987	1
700	0.0285268	1
700	0.033677	1
700	0.0276513	1
700	0.0317846	1
700	0.0321266	1
700	0.0321372	1
700	0.0310454	1
700	0.0283586	1
700	0.0293907	1
700	0.0303154	1
700	0.0297188	1
700	0.0306445	1
700	0.0284343	1
700	0.0306654	1
700	0.033061	1
700	0.0288282	1
700	0.0273372	1
700	0.028102	1
700	0.0341667	1
700	0.0283867	1
700	0.0327711	1
700	0.0317957	1
700	0.0305341	1
700	0.0300201	1
700	0.0315756	1
700	0.0299885	1
700	0.031419	1
700	0.0323246	1
700	0.0266306	1
700	0.0299551	1
700	0.0278558	1
700	0.0306029	1
700	0.031555	1
1000	0.0301354	NA
1000	0.0262668	0
1000	0.0270149	0
1000	0.0306166	0
1000	0.0281237	0
1000	0.0258419	0
1000	0.0274024	0
1000	0.027227	0
1000	0.0278453	0
1000	0.0253932	0
1000	0.0283873	0
1000	0.0252473	0
1000	0.0273649	0
1000	0.0267293	0
1000	0.0226084	0
1000	0.0281936	0
1000	0.0254642	0
1000	0.0273929	0
1000	0.0238493	0
1000	0.0220916	0
1000	0.0232378	0
1000	0.0220534	0
1000	0.0236996	0
1000	0.0253167	0
1000	0.0268165	0
1000	0.0258924	0
1000	0.0266863	1
1000	0.0287806	1
1000	0.0276895	1
1000	0.0275829	1
1000	0.0285034	1
1000	0.0257193	1
1000	0.0272133	1
1000	0.0258064	1
1000	0.0268439	1
1000	0.0252751	0
1000	0.0225578	1
1000	0.0260785	1
1000	0.026156	1
1000	0.0303711	1
1000	0.0284589	1
1000	0.0259339	0
1000	0.0282832	1
1000	0.0302375	1
1000	0.0248043	1
1000	0.0267009	1
1000	0.0266739	1
1000	0.0272519	1
1000	0.0278658	1
1000	0.0283522	1
1000	0.026371	1
1000	0.0286681	1
1000	0.0287686	1
1000	0.0283279	1
1000	0.028866	1
1000	0.0271136	1
1000	0.0268342	1
1000	0.0290092	1
1000	0.0286858	1
1000	0.0262897	1
1000	0.0280058	NA
1000	0.0258286	0
1000	0.0274464	0
1000	0.0266093	0
1000	0.0256374	0
1000	0.0253267	0
1000	0.0221167	0
1000	0.0206381	0
1000	0.0229664	0
1000	0.0220447	0
1000	0.0250877	0
1000	0.025045	0
1000	0.021281	0
1000	0.0217169	0
1000	0.0249533	0
1000	0.0264279	0
1000	0.0248136	0
1000	0.024561	0
1000	0.0274171	0
1000	0.026027	0
1000	0.0247068	0
1000	0.0259837	0
1000	0.0245819	0
1000	0.0244716	1
1000	0.02552	1
1000	0.0301483	0
1000	0.0292495	1
1000	0.0290394	1
1000	0.0264861	1
1000	0.0266058	1
1000	0.0281274	1
1000	0.0279459	1
1000	0.028622	1
1000	0.0275909	1
1000	0.0284462	1
1000	0.0261499	1
1000	0.0278326	1
1000	0.0285914	1
1000	0.0244429	1
1000	0.0300945	1
1000	0.0286007	1
1000	0.0254194	1
1000	0.0292208	1
1000	0.0303658	1
1000	0.0272245	1
1000	0.0300394	1
1000	0.031224	1
1000	0.0297526	NA
1000	0.0254925	0
1000	0.0249273	0
1000	0.0260066	0
1000	0.0281198	0
1000	0.022615	0
1000	0.0284241	0
1000	0.0272883	0
1000	0.0289228	0
1000	0.0281607	0
1000	0.0273909	0
1000	0.027462	0
1000	0.0284072	0
1000	0.0241398	0
1000	0.0225046	0
1000	0.0236065	0
1000	0.0257143	0
1000	0.0258053	0
1000	0.0263769	0
1000	0.0255672	0
1000	0.0232182	0
1000	0.0250874	0
1000	0.0247967	0
1000	0.0261174	0
1000	0.0245211	0
1000	0.0245077	0
1000	0.0238717	0
1000	0.0242692	1
1000	0.0246573	1
1000	0.028316	1
1000	0.0266078	1
1000	0.0267906	1
1000	0.0292349	1
1000	0.0304592	1
1000	0.0305721	1
1000	0.0269798	1
1000	0.0256363	1
1000	0.0315411	0
1000	0.0253207	1
1000	0.0259139	1
1000	0.0251892	1
1000	0.0257327	1
1000	0.0252164	1
1000	0.032858	1
1000	0.0328261	1
1000	0.0244807	0
1000	0.0224287	1
1000	0.0276096	1
1000	0.0270185	1
1000	0.0287362	1
1000	0.0237383	0
1000	0.0260709	1
1000	0.0262639	1
1000	0.0259738	1
1000	0.032392	1
1000	0.0286103	1
1000	0.0293613	1
1000	0.0268025	1
1000	0.0243243	1
1000	0.024785	1
1000	0.0265018	1
1000	0.0280763	1
1000	0.0268644	1
1000	0.0258467	1
1000	0.0247251	1
1000	0.0279371	1
1000	0.0290476	1
1000	0.0259698	0
1000	0.0289394	1
1000	0.0257062	1
1000	0.0243094	1
1000	0.0245824	1
1000	0.0292596	1
1000	0.0255161	NA
1000	0.0311159	NA
1000	0.0345981	NA
1000	0.0287028	NA
1000	0.0284722	NA
1000	0.0300466	NA
1000	0.0226532	0
1000	0.0315645	1
1000	0.0292098	1
1000	0.0292649	0
1000	0.0274402	0
1000	0.0250393	1
1000	0.0245882	0
1000	0.0249908	1
1000	0.0290305	1
1000	0.0281472	0
1000	0.0265886	0
1000	0.0283675	1
1000	0.0238139	0
1000	0.0269068	1
1000	0.0283015	1
1000	0.0260882	1
1000	0.0235056	0
1000	0.0261246	1
1000	0.0295739	1
1000	0.0235856	0
1000	0.0306478	1
1000	0.0286746	1
1000	0.0277528	0
1000	0.0254853	1
1000	0.0268186	0
1000	0.0282416	1
1000	0.0300736	1
1000	0.0276167	0
1000	0.0285628	1
1000	0.0225693	0
1000	0.0279351	1
1000	0.0284853	1
1000	0.0256637	1
1000	0.0295006	1
1000	0.0295237	NA
1000	0.0333525	NA
1000	0.0284972	NA
1000	0.0312851	NA
1000	0.02783	1
1000	0.0289835	0
1000	0.0300536	1
1000	0.0299788	1
1000	0.0284127	0
1000	0.0303723	1
1000	0.0282268	1
1000	0.026544	0
1000	0.0291197	1
1000	0.0279074	1
1000	0.026421	0
1000	0.0334186	1
1000	0.026995	1
1000	0.0281092	0
1000	0.0281826	0
1000	0.0267887	1
1000	0.0282191	1
1000	0.0250247	0
1000	0.0338615	1
1000	0.0283748	1
1000	0.0239328	0
1000	0.0269943	1
1000	0.0245196	0
1000	0.0293005	1
1000	0.0314471	1
1000	0.0226373	0
1000	0.0243482	1
1000	0.0271539	0
1000	0.0279291	1
1000	0.0284792	1
1000	0.0278678	0
1000	0.027406	1
1000	0.0259273	0
1000	0.0270591	1
1000	0.0269919	1
1000	0.027202	0
1000	0.0275083	1
1000	0.0270165	0
1000	0.0277287	1
1000	0.034832	1
1000	0.0289265	0
1000	0.0285577	1
1000	0.0275984	1
1000	0.0256242	0
1000	0.0290388	1
1000	0.0258276	1
1000	0.0277838	0
1000	0.0275891	1
1000	0.0253408	0
1000	0.0287281	1
1000	0.029079	1
1000	0.0268442	0
1000	0.0241134	1
1000	0.0272385	1
1000	0.0228789	0
1000	0.0242952	1
1000	0.026281	1
1000	0.0234535	0
1000	0.0264276	1
1000	0.0250689	0
1000	0.0279803	1
1000	0.028259	1
1000	0.0230007	0
1000	0.0231036	0
1000	0.0261856	1
1000	0.0284843	1
1000	0.023954	0
1000	0.0320365	NA
1000	0.0283185	NA
1000	0.0278633	NA
1000	0.0284182	NA
1000	0.0261577	0
1000	0.0283428	1
1000	0.0285534	0
1000	0.0279276	1
1000	0.0279351	1
1000	0.0272408	0
1000	0.0254747	1
1000	0.0286802	1
1000	0.0311025	1
1000	0.0257213	0
1000	0.0263836	1
1000	0.033279	1
1000	0.0266599	0
1000	0.0275586	1
1000	0.0312483	0
1000	0.028205	1
1000	0.0244507	0
1000	0.0263544	1
1000	0.0232776	0
1000	0.0273553	1
1000	0.0238749	1
1000	0.0205065	0
1000	0.026935	1
1000	0.0281464	1
1000	0.025336	0
1000	0.0238122	0
1000	0.0292499	1
1000	0.0239107	1
1000	0.0252127	0
1000	0.0232204	0
1000	0.0265462	1
1000	0.0256595	1
1000	0.0276051	0
1000	0.0279104	1
1000	0.0307835	1
1000	0.0283215	1
1000	0.0242587	0
1000	0.0262094	1
1000	0.026008	0
1000	0.025678	1
1000	0.0260713	1
1000	0.0218615	0
1000	0.0294787	1
1000	0.0247387	1
1000	0.0261695	0
1000	0.023944	1
1000	0.0242177	1
1000	0.0259029	1
1000	0.0262821	0
1000	0.0258055	1
1000	0.0249603	0
1000	0.0282877	1
1000	0.0295909	1
1000	0.0253371	1
1000	0.0273781	0
1000	0.0276599	0
1000	0.0263229	1
1000	0.0244219	0
1000	0.0289134	1
1000	0.028026	1
1000	0.0276071	1
1000	0.0290347	0
1000	0.0259558	0
1000	0.0266793	1
1000	0.027198	1
1000	0.0293193	0
1000	0.0266801	0
1000	0.0273851	0
1000	0.0276035	0
1000	0.0298249	1
1000	0.0248382	0
1000	0.0263278	1
1000	0.025433	1
1000	0.0258362	1
1000	0.0257457	0
1000	0.0310027	1
1000	0.0271527	NA
1000	0.0295204	0
1000	0.0280746	0
1000	0.0269441	0
1000	0.0260046	0
1000	0.0221074	0
1000	0.0240882	0
1000	0.0245815	0
1000	0.0255293	0
1000	0.0288016	1
1000	0.0261681	1
1000	0.0290324	1
1000	0.0247424	1
1000	0.0318994	1
1000	0.0317416	1
1000	0.0321994	1
1000	0.0331272	1
1000	0.0318683	1
1000	0.0261052	NA
1000	0.0292104	0
1000	0.025992	0
1000	0.0259274	0
1000	0.0239064	0
1000	0.0257334	0
[truncated: 1,220 more rows]

## Sheet: Fig 3C 4C
Fig 3C and 4C Bootstrap data
Light excitation (ms)	λ (min-1)	a
70	0.00236898	0.350764
70	0.00266183	0.329032
70	0.00283763	0.362247
70	0.00218707	0.353737
70	0.00220462	0.311689
70	0.00261419	0.351823
70	0.00230743	0.355335
70	0.00216434	0.351682
70	0.00240074	0.359822
70	0.00263443	0.314362
70	0.00238804	0.348544
70	0.00234266	0.353018
70	0.00264278	0.361151
70	0.00244987	0.327605
70	0.00227168	0.365289
70	0.00223631	0.344999
70	0.00220762	0.357786
70	0.00247441	0.345685
70	0.00256012	0.318058
70	0.00241135	0.327307
70	0.00254529	0.339747
70	0.00247581	0.345409
70	0.00257936	0.346803
70	0.00233783	0.348228
70	0.00214878	0.358421
70	0.00233088	0.349332
70	0.00241216	0.344725
70	0.00277219	0.370883
70	0.00247277	0.34841
70	0.00263497	0.34666
70	0.0026411	0.365945
70	0.00250432	0.344102
70	0.00243618	0.360647
70	0.00233434	0.361399
70	0.00282583	0.374651
70	0.00236452	0.337949
70	0.00233963	0.364168
70	0.00264272	0.359095
70	0.00270813	0.352842
70	0.00210535	0.324936
70	0.0024898	0.351232
70	0.00221171	0.34558
70	0.00255876	0.373077
70	0.00259141	0.353801
70	0.00269422	0.357389
70	0.00227801	0.34705
70	0.00240701	0.338436
70	0.00242482	0.359696
70	0.0025657	0.342532
70	0.00217084	0.350998
70	0.00243303	0.374621
70	0.00237407	0.347084
70	0.00261332	0.331402
70	0.00242909	0.341406
70	0.00241074	0.368556
70	0.00236613	0.367654
70	0.0022547	0.357001
70	0.00246844	0.337089
70	0.00245984	0.329702
70	0.00250748	0.337597
70	0.00242714	0.364174
70	0.00261664	0.373614
70	0.00216865	0.360273
70	0.00243513	0.345221
70	0.00256205	0.364427
70	0.00262088	0.334682
70	0.00249	0.358201
70	0.00255707	0.353508
70	0.00232785	0.344926
70	0.00256669	0.338424
70	0.00242045	0.34407
70	0.00261424	0.367259
70	0.00243025	0.323314
70	0.00263315	0.342614
70	0.00251711	0.361779
70	0.00262763	0.34968
70	0.00253679	0.359264
70	0.00276613	0.379624
70	0.00222859	0.34898
70	0.00235748	0.362695
70	0.00230103	0.365289
70	0.00235298	0.34322
70	0.00234825	0.362871
70	0.0025268	0.344483
70	0.00254178	0.361269
70	0.00241018	0.359729
70	0.00256957	0.370321
70	0.00238873	0.350575
70	0.00231022	0.369638
70	0.00236042	0.370515
70	0.00260273	0.365274
70	0.00235025	0.340816
70	0.00247994	0.361322
70	0.00227197	0.344722
70	0.00257213	0.388375
70	0.00243375	0.334751
70	0.00225907	0.348493
70	0.00233605	0.370283
70	0.00251103	0.346467
70	0.00234879	0.373898
70	0.00246664	0.331986
70	0.00222281	0.332779
70	0.00253656	0.363222
70	0.00250094	0.361908
70	0.00218982	0.346954
70	0.00237382	0.372288
70	0.00259207	0.341562
70	0.00241103	0.347306
70	0.00217471	0.369676
70	0.00243535	0.351444
70	0.00275569	0.339899
70	0.00258152	0.357538
70	0.00256395	0.359499
70	0.00246291	0.362324
70	0.00216183	0.364959
70	0.0025246	0.340286
70	0.00229912	0.351756
70	0.0023202	0.346964
70	0.00224189	0.344382
70	0.00245664	0.373126
70	0.00273074	0.333331
70	0.00263134	0.380392
70	0.00251311	0.369708
70	0.00226277	0.347934
70	0.00260915	0.360702
70	0.00233688	0.352559
70	0.00250412	0.34618
70	0.00186546	0.323754
70	0.00227463	0.354352
70	0.00229626	0.339993
70	0.00240835	0.354934
70	0.00300945	0.38345
70	0.00264936	0.337133
70	0.0024335	0.345657
70	0.0023668	0.366574
70	0.00227516	0.34894
70	0.00254726	0.383341
70	0.00250266	0.335415
70	0.00238694	0.349391
70	0.0026786	0.36856
70	0.00254035	0.342499
70	0.00282155	0.349289
70	0.00225914	0.340786
70	0.00232241	0.337805
70	0.00240915	0.346788
70	0.00228024	0.331906
70	0.00231563	0.358064
70	0.00237902	0.346337
70	0.00265489	0.351726
70	0.00268386	0.352999
70	0.00266837	0.332885
70	0.00227364	0.341803
70	0.00226815	0.333059
70	0.00238519	0.365121
70	0.00228384	0.341027
70	0.00251448	0.355929
70	0.0026054	0.350942
70	0.00243494	0.319898
70	0.00270535	0.332296
70	0.00225621	0.345078
70	0.00255951	0.325176
70	0.00252143	0.361151
70	0.0023269	0.36423
70	0.0024356	0.347438
70	0.00265036	0.372449
70	0.00269883	0.34735
70	0.0021964	0.330597
70	0.00256196	0.352816
70	0.00249989	0.338205
70	0.00225695	0.365537
70	0.00260847	0.357236
70	0.00263665	0.337644
70	0.00283983	0.338795
70	0.00245251	0.339588
70	0.00256629	0.359413
70	0.00249446	0.343302
70	0.0022241	0.332536
70	0.00264774	0.38409
70	0.00251368	0.334929
70	0.00240491	0.363999
70	0.00246091	0.35775
70	0.00230137	0.371128
70	0.0023369	0.354464
70	0.00243477	0.355663
70	0.00269583	0.373675
70	0.00243773	0.352736
70	0.00254239	0.357455
70	0.00292614	0.367145
70	0.00266152	0.361542
70	0.00246541	0.364986
70	0.002392	0.339318
70	0.00258609	0.350755
70	0.00233979	0.346552
70	0.00240963	0.35937
70	0.00237235	0.348578
70	0.00208499	0.325508
70	0.00262957	0.330693
70	0.00237275	0.356942
70	0.00232338	0.363649
70	0.00266268	0.367866
70	0.0023231	0.347992
70	0.00241372	0.315274
70	0.00238487	0.33352
70	0.00246592	0.358853
70	0.00253862	0.356212
70	0.00233076	0.344825
70	0.00241376	0.343366
70	0.00253607	0.348924
70	0.00243855	0.340915
70	0.0024549	0.354006
70	0.00237307	0.340664
70	0.00235469	0.353177
70	0.00249608	0.341677
70	0.00220654	0.331895
70	0.00222439	0.346237
70	0.00277828	0.37011
70	0.00255716	0.371327
70	0.00283522	0.35829
70	0.00247942	0.352472
70	0.0024131	0.358655
70	0.00230135	0.341782
70	0.00247468	0.3457
70	0.00250571	0.352259
70	0.00244206	0.363631
70	0.0027492	0.357877
70	0.00249984	0.340364
70	0.00219755	0.322454
70	0.00250567	0.346107
70	0.00269565	0.360951
70	0.00224087	0.363488
70	0.00216991	0.349475
70	0.00240985	0.350661
70	0.00245488	0.365283
70	0.00243539	0.346034
70	0.00250316	0.339389
70	0.00231645	0.323909
70	0.00270547	0.37236
70	0.0022947	0.340537
70	0.00257107	0.372948
70	0.00215505	0.338405
70	0.00215092	0.332343
70	0.00232663	0.342862
70	0.00251433	0.362861
70	0.00235274	0.342324
70	0.00222775	0.341276
70	0.00264465	0.373598
70	0.00233789	0.370717
70	0.0025761	0.365297
70	0.00225247	0.337064
70	0.00239611	0.326631
70	0.00217533	0.36332
70	0.00244539	0.344673
70	0.00232192	0.354594
70	0.00232651	0.34815
70	0.00225558	0.321103
70	0.00241932	0.346999
70	0.00241743	0.342476
70	0.0023917	0.351419
70	0.00250098	0.34112
70	0.00214074	0.334922
70	0.00219372	0.348044
70	0.00272425	0.375662
70	0.00258139	0.377946
70	0.00233095	0.341831
70	0.00263343	0.355954
70	0.00255454	0.354232
70	0.00249802	0.344216
70	0.00223523	0.370502
70	0.00253749	0.350234
70	0.00220799	0.336252
70	0.00253915	0.314167
70	0.00257283	0.349281
70	0.00216077	0.32222
70	0.00259437	0.372577
70	0.0022743	0.349298
70	0.00225393	0.350944
70	0.00245567	0.335143
70	0.00236578	0.360292
70	0.00256635	0.325998
70	0.00255624	0.349505
70	0.00250379	0.333729
70	0.00245758	0.345851
70	0.00235869	0.349629
70	0.0021877	0.346977
70	0.00249158	0.349649
70	0.00267127	0.368863
70	0.00254136	0.336498
70	0.00254873	0.377913
70	0.00260421	0.358538
70	0.00264401	0.351731
70	0.00276078	0.343261
70	0.00241521	0.330829
70	0.00227003	0.360137
70	0.00225856	0.381496
70	0.00230739	0.338011
70	0.00265512	0.351796
70	0.00224034	0.367448
70	0.00256224	0.347834
70	0.00256404	0.364954
70	0.00239178	0.353286
70	0.00234601	0.361008
70	0.0021282	0.328673
70	0.00221139	0.302962
70	0.00230891	0.32937
70	0.00251942	0.364716
70	0.00270363	0.356957
70	0.00240717	0.327484
70	0.00214098	0.327599
70	0.00245259	0.343378
70	0.00209412	0.348563
70	0.00260813	0.341269
70	0.00253613	0.345632
70	0.00276389	0.367323
70	0.00249263	0.363307
70	0.00259089	0.381111
70	0.00248889	0.343212
70	0.00211423	0.352199
70	0.00253268	0.377513
70	0.00242227	0.348283
70	0.00232492	0.333702
70	0.00254763	0.324194
70	0.00243736	0.314552
70	0.00243064	0.359329
70	0.00226534	0.342394
70	0.00203395	0.333355
70	0.00226168	0.354506
70	0.0024902	0.36631
70	0.00239486	0.347758
70	0.00251104	0.353156
70	0.00247607	0.365032
70	0.00222455	0.333733
70	0.00229056	0.335762
70	0.00230957	0.337519
70	0.00251074	0.366963
70	0.00225629	0.344136
70	0.0022406	0.346172
70	0.00227143	0.340166
70	0.00256574	0.371566
70	0.00238798	0.350595
70	0.00241943	0.332224
70	0.00246217	0.342658
70	0.00250064	0.364465
70	0.00251886	0.340284
70	0.0021713	0.353709
70	0.00268601	0.378295
70	0.00244158	0.360996
70	0.00223325	0.35155
70	0.00235296	0.380155
70	0.00225271	0.356499
70	0.00233662	0.348044
70	0.00244994	0.349602
70	0.00228922	0.324768
70	0.00202624	0.32372
70	0.00207616	0.354744
70	0.00251746	0.385402
70	0.00243067	0.351039
70	0.00232437	0.345504
70	0.00265047	0.350028
70	0.00234321	0.368166
70	0.00244363	0.326531
70	0.00246109	0.34279
70	0.00227625	0.330111
70	0.00230314	0.329106
70	0.00237962	0.358252
70	0.00239064	0.391081
70	0.00265902	0.356085
70	0.00246499	0.340499
70	0.00243461	0.357288
70	0.00251017	0.363903
70	0.002536	0.352905
70	0.00239056	0.367698
70	0.0020715	0.335269
70	0.00237609	0.347902
70	0.0024105	0.357922
70	0.00235507	0.345709
70	0.00236786	0.347829
70	0.00252274	0.362367
70	0.0024024	0.326404
70	0.00216885	0.330008
70	0.00231783	0.339545
70	0.00230087	0.335581
70	0.00248716	0.376791
70	0.0023532	0.339903
70	0.00230312	0.341556
70	0.00269303	0.345395
70	0.002313	0.348744
70	0.00262844	0.346372
70	0.00243371	0.336467
70	0.00218745	0.326403
70	0.00235177	0.350567
70	0.00264946	0.368426
70	0.00243741	0.366625
70	0.00257424	0.3878
70	0.00248143	0.362322
70	0.00242141	0.367722
70	0.00261057	0.366937
70	0.00266621	0.334589
70	0.00214994	0.36409
70	0.00221508	0.34168
70	0.0020921	0.329217
70	0.00252933	0.345155
70	0.00247709	0.370188
70	0.00221344	0.336733
70	0.00250568	0.355918
70	0.00262227	0.350578
70	0.00211904	0.340104
70	0.00274542	0.348102
70	0.0025291	0.350729
70	0.0024235	0.338314
70	0.00243159	0.338908
70	0.00224509	0.352539
70	0.00220802	0.34928
70	0.00242185	0.346299
70	0.00261095	0.35839
70	0.00262424	0.376692
70	0.00244186	0.342051
70	0.00255216	0.325397
70	0.0023949	0.326525
70	0.00256574	0.357585
70	0.00249392	0.357875
70	0.00252252	0.321715
70	0.00245171	0.370305
70	0.00247587	0.324149
70	0.00239499	0.359244
70	0.00238981	0.333252
70	0.00244773	0.369577
70	0.00256056	0.371275
70	0.0025804	0.331873
70	0.00278479	0.338726
70	0.0021869	0.337436
70	0.00225376	0.349541
70	0.00244432	0.327271
70	0.00268788	0.339115
70	0.00243883	0.337764
70	0.00268884	0.367221
70	0.00252262	0.362627
70	0.00255452	0.356977
70	0.00240595	0.351706
70	0.00248266	0.321446
70	0.00226808	0.367873
70	0.0027435	0.361004
70	0.00241856	0.326102
70	0.00270569	0.376821
70	0.00241695	0.361193
70	0.00252179	0.362121
70	0.0024394	0.33784
70	0.00249545	0.361744
70	0.0026319	0.344909
70	0.00229494	0.325885
70	0.0024878	0.31419
70	0.00238841	0.342728
70	0.00278547	0.349728
70	0.00228537	0.359553
70	0.00236766	0.348233
70	0.00212333	0.388291
70	0.00256139	0.331647
70	0.00267812	0.338895
70	0.00259847	0.36301
70	0.00226612	0.331391
70	0.00232195	0.344214
70	0.00260302	0.346223
70	0.00238795	0.367733
70	0.00218773	0.32504
70	0.00256888	0.339965
70	0.00227065	0.358972
70	0.00209804	0.367769
70	0.00248395	0.343493
70	0.00239468	0.375368
70	0.00233589	0.352826
70	0.0025743	0.370083
70	0.00226941	0.342878
70	0.00212345	0.329635
70	0.00229845	0.344374
70	0.00231388	0.37521
70	0.00257206	0.381387
70	0.00244574	0.342662
70	0.00266019	0.354043
70	0.00243033	0.347299
70	0.00279819	0.339764
70	0.00258825	0.323661
70	0.00229112	0.350773
70	0.00246199	0.340745
70	0.00238178	0.363275
70	0.0023538	0.359811
70	0.00252899	0.343731
70	0.0026309	0.335522
70	0.00244828	0.330735
70	0.00239511	0.340182
70	0.00214529	0.332828
70	0.00253714	0.368018
70	0.0024238	0.368793
70	0.00226879	0.34725
70	0.00259524	0.332788
70	0.0024238	0.343558
70	0.00242234	0.341619
70	0.00229204	0.318456
70	0.00258528	0.359739
70	0.00243412	0.353153
70	0.00214486	0.340558
70	0.00226305	0.341819
70	0.00287806	0.351887
70	0.0022303	0.368234
70	0.00257508	0.36025
70	0.00214734	0.324013
70	0.00236022	0.330901
70	0.00276315	0.361451
70	0.00229732	0.368908
70	0.00220051	0.319106
70	0.00225679	0.382271
70	0.00232829	0.356577
70	0.00265569	0.318051
70	0.00255056	0.337823
70	0.00232755	0.357922
70	0.00283029	0.349771
70	0.00217759	0.38021
70	0.00216785	0.338572
70	0.00265674	0.340669
70	0.00242254	0.355254
70	0.00240543	0.339991
70	0.00276541	0.369613
70	0.0023599	0.326863
70	0.00283771	0.348812
70	0.00236946	0.352117
70	0.00253257	0.351533
70	0.00262968	0.352884
70	0.00244346	0.384291
70	0.00255613	0.358424
70	0.00213531	0.324176
70	0.00225612	0.358856
70	0.00269562	0.348766
70	0.00231106	0.328287
70	0.00266974	0.355859
70	0.00201059	0.331843
70	0.00234076	0.355533
70	0.00254192	0.364253
70	0.00285338	0.337606
70	0.00264412	0.34595
70	0.00248087	0.352918
70	0.0026359	0.340027
70	0.00262063	0.354197
70	0.0021995	0.335576
70	0.00243647	0.369903
70	0.00227608	0.347467
70	0.00204553	0.337923
70	0.0025945	0.357654
70	0.00239816	0.346616
70	0.00264728	0.356376
70	0.00243377	0.366456
70	0.00224757	0.327086
70	0.00228668	0.338544
70	0.00253492	0.367479
70	0.00254021	0.325476
70	0.00231492	0.323152
70	0.00270636	0.368347
70	0.00227264	0.323011
70	0.00261867	0.360317
70	0.00245458	0.366086
70	0.00258382	0.335983
70	0.00222503	0.354874
70	0.00243429	0.332823
70	0.00233726	0.357962
70	0.00207235	0.349538
70	0.00258516	0.360649
70	0.00239482	0.33106
70	0.00254099	0.36123
70	0.00230151	0.341293
70	0.00249392	0.356101
70	0.00252737	0.352491
70	0.00229522	0.385862
70	0.00226366	0.347082
70	0.00236688	0.342348
70	0.00202581	0.338747
70	0.0025549	0.352937
70	0.00249476	0.341001
70	0.00242442	0.356254
70	0.00226189	0.349504
70	0.00244098	0.355257
70	0.00254579	0.362222
70	0.00234105	0.339782
70	0.00270424	0.369691
70	0.00232381	0.37217
70	0.00226514	0.335513
70	0.00234402	0.350955
70	0.00257657	0.335276
70	0.00252252	0.346645
70	0.00240561	0.356388
70	0.0023864	0.349158
70	0.00259525	0.345766
70	0.00254814	0.359483
70	0.0024458	0.349839
70	0.00234619	0.374308
70	0.00225859	0.353027
70	0.00238731	0.339206
70	0.00259723	0.367506
70	0.00224357	0.355332
70	0.00221207	0.348155
70	0.00260359	0.352217
70	0.00261056	0.361939
70	0.00245583	0.325146
70	0.00248025	0.37435
70	0.00237536	0.318709
70	0.00264643	0.353803
70	0.00268027	0.347115
70	0.00247432	0.350137
70	0.00239569	0.335245
70	0.00220933	0.336289
70	0.00217634	0.341341
70	0.00251299	0.36894
70	0.00221374	0.325518
70	0.00259513	0.371663
70	0.00222329	0.346003
70	0.00255722	0.345512
70	0.002372	0.351929
70	0.00225446	0.341963
70	0.00260646	0.36884
70	0.00244433	0.351126
70	0.00261525	0.376622
70	0.00219715	0.365469
70	0.00240453	0.346376
70	0.002235	0.322771
70	0.00245498	0.352892
70	0.00221711	0.343668
70	0.00273442	0.349559
70	0.00235243	0.359635
70	0.00227407	0.341197
70	0.00244726	0.344989
70	0.00248106	0.346979
70	0.00219235	0.369471
70	0.00246052	0.348257
70	0.00267358	0.361831
70	0.00223164	0.323338
70	0.00259568	0.335439
70	0.00237737	0.34571
70	0.00265629	0.359758
70	0.00260733	0.34849
70	0.0025654	0.334553
70	0.00226852	0.331824
70	0.00218433	0.321167
70	0.00231972	0.329444
70	0.00224562	0.354596
70	0.00230876	0.365938
70	0.002545	0.321617
70	0.00239109	0.358805
70	0.00242328	0.344302
70	0.00246528	0.322299
70	0.00277635	0.324935
70	0.00222433	0.336627
70	0.00264751	0.359793
70	0.0025348	0.347762
70	0.0024725	0.358314
70	0.00255609	0.332925
70	0.00254654	0.371042
70	0.0024307	0.347644
70	0.00246526	0.370752
70	0.00249573	0.361956
70	0.00237435	0.358162
70	0.00218058	0.342052
70	0.00262726	0.362357
70	0.002289	0.353726
70	0.00254572	0.355092
70	0.00235051	0.380184
70	0.00234771	0.351168
70	0.00286702	0.356926
70	0.00225005	0.356461
70	0.0025205	0.365202
70	0.00239882	0.346441
70	0.00234288	0.367941
70	0.00224858	0.359757
70	0.00288801	0.361255
70	0.00254451	0.359647
70	0.00243572	0.368757
70	0.00255489	0.34906
70	0.0025316	0.358222
70	0.00226034	0.357802
70	0.00262536	0.373764
70	0.00251514	0.332658
70	0.0026895	0.339914
70	0.00215112	0.328155
70	0.00233422	0.341434
70	0.00220425	0.331431
70	0.00223223	0.361445
70	0.00215615	0.367233
70	0.00274768	0.363716
70	0.00270043	0.36769
70	0.00254147	0.356274
70	0.0023142	0.321099
70	0.00257687	0.321539
70	0.00265711	0.360483
70	0.0028367	0.357948
70	0.00252826	0.329939
70	0.00250407	0.344543
70	0.00261894	0.371685
70	0.00235448	0.32894
70	0.00209733	0.336437
70	0.00261858	0.371641
70	0.00261859	0.330359
70	0.0023691	0.3377
70	0.0023742	0.345319
70	0.00221718	0.345139
70	0.00250217	0.337607
70	0.00247663	0.3561
70	0.00241813	0.343373
70	0.00231845	0.343997
70	0.00217218	0.3586
70	0.00257184	0.344917
70	0.00275218	0.329267
70	0.00277265	0.384256
70	0.00250905	0.36902
70	0.00224349	0.370128
70	0.00259981	0.376441
70	0.00255677	0.341348
70	0.00245827	0.34635
70	0.00244356	0.340058
70	0.00225967	0.357108
70	0.00271309	0.347954
70	0.00224903	0.354248
70	0.00263709	0.336644
70	0.00265451	0.358548
70	0.00231467	0.364258
70	0.00228106	0.35043
70	0.00228987	0.369265
70	0.00209458	0.357407
70	0.00252176	0.353503
70	0.00236615	0.364495
70	0.00238476	0.345928
70	0.0026812	0.33997
70	0.00215622	0.376883
70	0.00227378	0.33906
70	0.00223609	0.355016
70	0.00228659	0.328573
70	0.00233663	0.346142
70	0.00235051	0.353793
70	0.00243734	0.353018
70	0.00230954	0.33568
70	0.00263068	0.377327
70	0.00260353	0.343832
70	0.00233769	0.338031
70	0.00213814	0.328068
70	0.0023718	0.342524
70	0.00233805	0.328678
70	0.00206225	0.366898
70	0.00233625	0.367332
70	0.00235649	0.352267
70	0.00212438	0.348557
70	0.00252818	0.348119
70	0.00242349	0.314433
70	0.00218043	0.364474
70	0.00250486	0.340608
70	0.00274334	0.333191
70	0.00221118	0.364289
70	0.00212306	0.344762
70	0.0023797	0.355651
70	0.00268829	0.327849
70	0.00261462	0.390436
70	0.00221796	0.371759
70	0.00244514	0.340309
70	0.00273218	0.344997
70	0.00256106	0.323896
70	0.00258242	0.349008
70	0.00231838	0.35199
70	0.00249517	0.356249
70	0.00241428	0.386271
70	0.00241317	0.386473
70	0.00252307	0.32736
70	0.00239109	0.358805
70	0.00223852	0.339408
70	0.00281287	0.348393
70	0.00260363	0.35746
70	0.0025307	0.364402
70	0.00227239	0.350971
70	0.00227617	0.33867
70	0.00253248	0.371476
70	0.00260682	0.347304
70	0.00250095	0.352712
70	0.00243554	0.324164
70	0.0024963	0.35495
70	0.00230413	0.354587
70	0.00256662	0.335501
70	0.00229348	0.318664
70	0.0026596	0.359897
70	0.0024415	0.371025
70	0.00240722	0.317321
70	0.00221128	0.355226
70	0.00270666	0.362709
70	0.00265831	0.355123
70	0.00248221	0.347093
70	0.00258777	0.339233
70	0.00242209	0.36941
70	0.00235724	0.35006
70	0.00244984	0.363734
70	0.00260596	0.35432
70	0.00251231	0.337965
70	0.00221986	0.344875
70	0.00265316	0.347274
70	0.0022533	0.344708
70	0.00239688	0.357704
70	0.00279893	0.366258
70	0.00232308	0.340978
70	0.00236342	0.33447
70	0.00236637	0.331854
70	0.00213436	0.336011
70	0.00249041	0.352644
70	0.00258908	0.354072
70	0.00236758	0.340511
70	0.00222466	0.354
70	0.00218028	0.352066
70	0.00257847	0.326694
70	0.00255036	0.35788
70	0.00213789	0.355412
70	0.00204304	0.32842
70	0.00242746	0.33672
70	0.00239978	0.332669
70	0.00252945	0.335407
70	0.00243986	0.349642
70	0.00253201	0.359731
70	0.00269567	0.36615
70	0.00250843	0.372077
70	0.00256944	0.372077
70	0.00243823	0.353689
70	0.00226004	0.3413
70	0.00260693	0.35738
70	0.00236376	0.351644
70	0.00260257	0.38949
70	0.0023487	0.356377
70	0.00263026	0.343793
70	0.00235758	0.339227
70	0.00233503	0.34038
70	0.00218439	0.343222
70	0.00236348	0.332205
70	0.00247614	0.370226
70	0.00230517	0.360121
70	0.00221817	0.313558
70	0.00259196	0.365099
70	0.0023288	0.3469
70	0.00255783	0.360222
70	0.00251298	0.361252
70	0.00219101	0.351174
70	0.00244816	0.364897
70	0.00252195	0.345007
70	0.00228475	0.375195
70	0.00231582	0.361563
70	0.00245453	0.350158
70	0.00263737	0.336544
70	0.00251917	0.359384
70	0.00240506	0.327196
70	0.00242111	0.3395
70	0.00246216	0.344255
70	0.00253884	0.349958
70	0.00200432	0.356801
70	0.00240807	0.354831
70	0.00250461	0.358631
70	0.00254024	0.362485
70	0.00268622	0.353114
70	0.00219521	0.340862
70	0.0024129	0.330481
70	0.00253977	0.359247
70	0.0023414	0.335675
70	0.00246064	0.342398
70	0.00236233	0.316707
70	0.00246287	0.35171
70	0.00250398	0.365689
70	0.00249199	0.365908
70	0.00240792	0.365455
70	0.00251812	0.339931
70	0.00238528	0.343546
70	0.00237864	0.341711
70	0.00259217	0.35077
70	0.00269774	0.348925
70	0.00240279	0.353809
70	0.00265541	0.367171
70	0.00211291	0.345729
70	0.00245044	0.348683
70	0.00252467	0.34333
70	0.00218165	0.378071
70	0.00258433	0.354062
70	0.0024413	0.36041
70	0.00274384	0.342607
70	0.00282724	0.342692
70	0.00245683	0.361752
70	0.00255041	0.351191
70	0.00199681	0.346142
70	0.00242215	0.34978
70	0.00237704	0.3598
70	0.00287541	0.359175
70	0.00224957	0.344091
70	0.00252473	0.35644
70	0.00248483	0.358112
70	0.00230946	0.361054
70	0.00234477	0.347232
70	0.00225671	0.369192
70	0.00233711	0.32904
70	0.00273412	0.363786
70	0.00241875	0.351518
70	0.00237403	0.360211
70	0.00252235	0.328003
70	0.00238411	0.34633
70	0.00260283	0.349954
70	0.00273127	0.381361
70	0.00238288	0.324808
70	0.00228262	0.349081
70	0.00226907	0.344763
70	0.00220729	0.368194
70	0.00245147	0.343455
70	0.00232421	0.353305
70	0.00249888	0.367344
70	0.00260475	0.358619
70	0.00263258	0.345966
70	0.00258859	0.347948
70	0.00269854	0.344425
70	0.00272537	0.362676
70	0.00232974	0.363505
70	0.00284913	0.361977
70	0.00229679	0.342265
70	0.00242422	0.332915
70	0.00258622	0.343569
70	0.00248429	0.351249
70	0.00224672	0.358351
70	0.00241958	0.331823
70	0.00243379	0.361575
70	0.00238859	0.36044
70	0.00250061	0.32292
70	0.00244829	0.342747
70	0.00225958	0.353127
70	0.00236462	0.347858
70	0.00261221	0.350512
70	0.00247112	0.350467
70	0.00229333	0.330819
70	0.00258238	0.355554
70	0.00237846	0.340812
70	0.00234661	0.348981
70	0.002457	0.341719
70	0.00232148	0.333808
70	0.00249834	0.353581
70	0.00226521	0.325704
70	0.0026651	0.337433
70	0.0023697	0.352385
70	0.00257345	0.351468
70	0.00209883	0.356494
70	0.00222258	0.350863
70	0.0023749	0.34668
70	0.00245064	0.370789
70	0.00238271	0.321568
70	0.00250645	0.385701
70	0.00229408	0.348963
70	0.00258338	0.348128
70	0.002425	0.347367
70	0.00256458	0.34975
70	0.00266949	0.338578
70	0.00255057	0.344008
70	0.00222538	0.329829
70	0.00245862	0.332631
70	0.00240966	0.354242
70	0.00216601	0.325357
70	0.00251033	0.330432
70	0.00217709	0.350607
70	0.00236164	0.346178
70	0.00272265	0.368885
70	0.00243692	0.324638
70	0.00237253	0.32137
70	0.00251857	0.360972
70	0.00220329	0.354717
70	0.00255684	0.328823
70	0.00236807	0.345522
70	0.00242959	0.339294
70	0.00246483	0.355525
70	0.00249071	0.339277
70	0.00218233	0.357713
70	0.00243476	0.3388
70	0.00219203	0.360752
70	0.00220546	0.34769
70	0.00220014	0.357457
70	0.00245896	0.33855
70	0.00238951	0.355723
70	0.00237022	0.341854
70	0.00243743	0.336003
70	0.0025219	0.370085
70	0.00209948	0.329423
70	0.00235921	0.314047
70	0.00254126	0.362807
70	0.00244089	0.375041
70	0.00279505	0.367338
70	0.00218589	0.350239
70	0.00246232	0.343855
70	0.00242636	0.338297
70	0.00244313	0.349939
70	0.00267551	0.32454
70	0.00256677	0.344195
70	0.00241519	0.350241
70	0.00228221	0.324831
70	0.00250327	0.367772
70	0.00244397	0.327375
70	0.00244686	0.317395
70	0.00264658	0.372178
70	0.00244368	0.348806
70	0.00268262	0.351806
70	0.0025918	0.354979
70	0.00223045	0.338511
70	0.00226472	0.344729
70	0.00256265	0.384281
70	0.00214827	0.343443
70	0.00259115	0.363047
70	0.00232254	0.341163
70	0.00228307	0.340331
70	0.00248041	0.363753
70	0.00238188	0.348263
70	0.00257991	0.377529
70	0.00254019	0.37872
70	0.00230576	0.372781
70	0.00243938	0.35683
70	0.00249407	0.338124
70	0.00248461	0.356039
70	0.00243414	0.349747
70	0.00224364	0.35484
70	0.00282212	0.375998
70	0.00248972	0.340652
70	0.00237073	0.317984
70	0.00245676	0.376076
70	0.00253821	0.331801
70	0.00245597	0.323955
70	0.00239137	0.366104
70	0.00229511	0.335354
70	0.00246079	0.36232
70	0.00246205	0.369375
70	0.00243529	0.343346
70	0.00235207	0.365993
70	0.00238735	0.331295
70	0.0023862	0.332148
70	0.0025638	0.362871
70	0.00219204	0.344269
70	0.00265525	0.349177
70	0.00242896	0.364838
70	0.0020397	0.336426
70	0.00222894	0.363553
70	0.00259675	0.317069
70	0.00240128	0.352211
70	0.00242839	0.346152
70	0.00273901	0.359951
70	0.00217231	0.355152
70	0.00252581	0.360589
70	0.00270288	0.365436
70	0.00236395	0.350329
70	0.00251818	0.352983
70	0.00211972	0.327057
70	0.00235656	0.344859
70	0.00254332	0.371939
70	0.00258243	0.357499
70	0.00216886	0.365933
70	0.00233464	0.32698
70	0.00249444	0.350317
70	0.0026667	0.350086
70	0.00239853	0.331078
70	0.00235397	0.366002
70	0.0022711	0.34562
70	0.00226712	0.368856
70	0.00236524	0.343826
70	0.00282689	0.358306
70	0.00238495	0.348703
70	0.00216395	0.342242
70	0.00240695	0.343462
70	0.002213	0.338571
70	0.00252014	0.351989
70	0.00237125	0.358118
70	0.00247128	0.358464
70	0.00291088	0.36718
70	0.00246189	0.349742
70	0.00231521	0.324731
70	0.00260079	0.379514
70	0.00254799	0.342894
70	0.00257009	0.342741
70	0.00264794	0.351249
70	0.00248674	0.351437
70	0.00242003	0.335586
70	0.00232207	0.339049
70	0.00206922	0.330345
70	0.00252171	0.360999
70	0.00214038	0.354802
70	0.00242585	0.345833
70	0.00199339	0.371449
70	0.00254301	0.366485
70	0.00230937	0.320754
70	0.00228898	0.32954
70	0.00239663	0.350087
70	0.00248299	0.352595
70	0.00225739	0.365975
70	0.00247131	0.355611
70	0.00216149	0.361209
70	0.00239774	0.347467
70	0.00243787	0.361453
70	0.00227323	0.3397
70	0.00212339	0.347112
70	0.00214728	0.337809
70	0.00253639	0.388379
70	0.00259485	0.338734
70	0.0024892	0.349028
70	0.00240309	0.362117
70	0.0020947	0.342888
70	0.00256244	0.356968
70	0.00237442	0.351287
70	0.00247006	0.335004
70	0.00248105	0.372412
70	0.00275976	0.385242
70	0.00250779	0.355927
70	0.00258251	0.358822
70	0.00302402	0.359436
70	0.00243142	0.36389
70	0.00237908	0.356417
70	0.00256691	0.351198
70	0.00244427	0.370073
70	0.0020478	0.349671
70	0.00224423	0.369689
70	0.00221471	0.338262
70	0.00246164	0.353621
70	0.00261686	0.364013
70	0.00229501	0.321895
70	0.00267016	0.348678
70	0.00228708	0.328583
70	0.00268305	0.346886
70	0.0025277	0.365001
70	0.00231522	0.341077
70	0.00222904	0.323991
70	0.00254709	0.372752
70	0.00256309	0.370123
70	0.00254771	0.346557
70	0.00225767	0.347779
70	0.00232814	0.35224
70	0.00242686	0.341292
70	0.00252926	0.350107
70	0.00237341	0.358487
70	0.00237538	0.367982
70	0.00290749	0.347087
70	0.00265919	0.337461
70	0.00249265	0.37046
70	0.00228102	0.355053
70	0.00244469	0.350625
70	0.00253167	0.322549
70	0.00228849	0.349705
70	0.00241046	0.325139
70	0.00253331	0.389292
70	0.00242758	0.349066
70	0.00248411	0.354803
70	0.00240906	0.368944
70	0.00200724	0.355812
70	0.00251004	0.344524
70	0.00264355	0.360344
70	0.00228159	0.373331
70	0.00233322	0.342322
70	0.00262472	0.345293
70	0.00235645	0.353042
70	0.00214856	0.334564
70	0.00251031	0.347691
70	0.00274574	0.340717
70	0.00275628	0.338016
70	0.00264354	0.361936
70	0.00258089	0.348103
70	0.0027171	0.341643
70	0.00239796	0.363618
70	0.00240361	0.336359
70	0.00258214	0.359589
70	0.00255305	0.349184
70	0.00246212	0.334563
70	0.00268611	0.349717
70	0.00243591	0.34428
70	0.00246706	0.350252
70	0.00232718	0.344693
70	0.00244257	0.343065
70	0.00242561	0.337227
70	0.00249594	0.35686
70	0.00253935	0.347186
70	0.00238455	0.35358
70	0.00244712	0.337736
70	0.00248135	0.360068
70	0.0024666	0.345182
70	0.00259407	0.348228
70	0.00238558	0.354667
70	0.00207733	0.345322
70	0.00263633	0.313822
70	0.00233686	0.348403
70	0.00240923	0.369604
70	0.00234687	0.364038
70	0.0025048	0.334425
70	0.00245821	0.355473
70	0.00263723	0.338703
70	0.0024693	0.362448
70	0.00272254	0.335127
70	0.00259409	0.363622
70	0.00244253	0.352987
70	0.0022184	0.335695
70	0.00238343	0.341292
70	0.00253754	0.356163
70	0.00238958	0.318994
70	0.00249145	0.344635
70	0.00222793	0.330815
70	0.00237507	0.365312
70	0.00273998	0.363495
70	0.00233088	0.367253
70	0.00249859	0.348657
70	0.00264557	0.375232
70	0.00240749	0.358285
70	0.00269036	0.381233
70	0.00243363	0.349513
70	0.0020831	0.353307
70	0.00257663	0.319223
70	0.00214756	0.342822
70	0.00284046	0.342594
70	0.00246198	0.333453
70	0.00236618	0.35536
70	0.00238727	0.349883
70	0.00217083	0.377959
70	0.00250257	0.351509
70	0.00263016	0.346605
70	0.00253353	0.341801
70	0.00237806	0.31558
70	0.00241043	0.353267
70	0.00227217	0.32421
70	0.00242168	0.330479
70	0.00264397	0.371021
70	0.00252456	0.366427
70	0.00242698	0.363498
70	0.00253988	0.367702
70	0.00265849	0.359109
70	0.00248916	0.332769
70	0.0025973	0.369056
70	0.00253881	0.335415
70	0.00209449	0.341812
70	0.00242776	0.366913
70	0.00246013	0.32655
70	0.00271611	0.362992
70	0.00262954	0.338744
70	0.0021866	0.376403
70	0.00226386	0.352857
70	0.00231024	0.342917
70	0.00244078	0.354659
70	0.00263836	0.371687
70	0.00261413	0.360946
70	0.00239814	0.330651
70	0.00218367	0.344057
70	0.00234916	0.342656
70	0.00225982	0.332357
70	0.00230275	0.353316
70	0.00231312	0.336592
70	0.00224404	0.332805
70	0.00219486	0.349254
70	0.00259849	0.359457
70	0.0026102	0.343448
70	0.00256599	0.343843
70	0.00221275	0.368276
70	0.00243468	0.3429
70	0.00238476	0.344641
70	0.00240099	0.370699
70	0.00229419	0.350002
70	0.00272692	0.342762
70	0.00244713	0.319178
70	0.00227371	0.344722
70	0.00256089	0.349683
70	0.0022958	0.342367
70	0.0025603	0.358538
70	0.0022318	0.342448
70	0.00269787	0.325311
70	0.00262714	0.350264
70	0.00223501	0.344264
70	0.00250879	0.373677
70	0.00238256	0.351347
70	0.00249834	0.36112
70	0.00228746	0.32869
70	0.00258562	0.355541
70	0.0024547	0.357964
70	0.00230855	0.367365
70	0.00255468	0.328976
70	0.00253388	0.37059
70	0.00242391	0.362335
70	0.00243485	0.359177
70	0.00253655	0.339144
70	0.00248156	0.357242
70	0.00260554	0.361767
70	0.00257451	0.340612
70	0.0028422	0.360604
70	0.00242795	0.365946
70	0.00227072	0.349589
70	0.00265471	0.321585
70	0.00253048	0.346465
70	0.0024224	0.34269
70	0.00234061	0.337738
70	0.00247562	0.352636
70	0.00245118	0.317506
70	0.00210779	0.321383
70	0.00253219	0.360407
70	0.00227591	0.360758
70	0.00241951	0.369281
70	0.00236169	0.355719
70	0.00242285	0.332447
70	0.00247452	0.348578
70	0.00233648	0.338021
70	0.00236123	0.353577
70	0.00251002	0.349481
70	0.00255801	0.338092
70	0.0024909	0.366804
70	0.00236086	0.35423
70	0.00263189	0.34648
70	0.00265001	0.35388
70	0.0024666	0.335561
70	0.00264984	0.367265
70	0.00203989	0.329799
70	0.00268229	0.374062
70	0.00267103	0.372113
70	0.00268708	0.369681
70	0.00233736	0.35823
70	0.00240777	0.337642
70	0.00269712	0.355814
70	0.00225373	0.331161
70	0.00235465	0.359206
70	0.00227355	0.347267
70	0.00267066	0.347341
70	0.00221242	0.374369
70	0.0026084	0.361916
70	0.00268704	0.368454
70	0.00252103	0.348237
70	0.00219728	0.333136
70	0.0025376	0.374721
70	0.00251589	0.350285
70	0.00253686	0.356149
70	0.00264486	0.350414
70	0.00246062	0.345306
70	0.00232243	0.34686
70	0.00248985	0.358459
70	0.00238172	0.329745
70	0.00262291	0.368433
70	0.00257829	0.345918
70	0.00220328	0.366072
70	0.00263083	0.361321
70	0.00245361	0.345768
70	0.00260502	0.347048
70	0.00221094	0.354774
70	0.00239132	0.355313
70	0.00265457	0.340375
70	0.0023277	0.346071
70	0.00235971	0.357281
70	0.0024565	0.360956
70	0.00217968	0.357343
70	0.00231347	0.339357
70	0.00249691	0.335451
70	0.00208965	0.350947
70	0.00257133	0.353619
70	0.00249642	0.355716
70	0.00243346	0.351941
70	0.00248939	0.351079
70	0.00249604	0.336065
70	0.00240904	0.350751
70	0.00226129	0.341659
70	0.00252257	0.359811
70	0.00227763	0.339595
70	0.00263191	0.345904
70	0.00252135	0.348184
70	0.00233702	0.339669
70	0.00267315	0.328494
70	0.00256945	0.362165
70	0.00261904	0.342046
70	0.00252501	0.331321
70	0.00223245	0.368209
70	0.00265287	0.357008
70	0.00250502	0.349069
70	0.00242272	0.344283
70	0.0023348	0.369213
70	0.00240989	0.362303
70	0.00225619	0.381935
70	0.00250679	0.364004
70	0.00252616	0.314084
70	0.00220762	0.331852
70	0.00240658	0.343572
70	0.00182979	0.349108
70	0.00261067	0.364163
70	0.0026052	0.359056
70	0.00258856	0.344278
70	0.00250924	0.34572
70	0.00241394	0.353188
70	0.00211591	0.352661
70	0.00225883	0.338682
70	0.00255916	0.358128
70	0.0023351	0.366462
70	0.00239537	0.34021
70	0.00287644	0.347428
70	0.00247365	0.337581
70	0.00222779	0.37633
70	0.00250066	0.340751
70	0.00237653	0.351792
70	0.00250378	0.341328
70	0.0022926	0.328958
70	0.00234396	0.331487
70	0.00249122	0.345742
70	0.00235951	0.341962
70	0.00243726	0.358959
70	0.00227626	0.337923
70	0.00236629	0.347663
70	0.00257527	0.34108
70	0.0027864	0.351018
70	0.00214286	0.333494
70	0.00230257	0.338164
70	0.0025196	0.33637
70	0.0026395	0.37151
70	0.00219994	0.355672
70	0.00240522	0.3014
70	0.00243612	0.370506
70	0.00240419	0.326771
70	0.00248054	0.357344
70	0.00216298	0.336376
70	0.00231329	0.342426
70	0.00265869	0.346834
70	0.00247477	0.355371
70	0.00216766	0.346735
70	0.00264425	0.35988
70	0.00224895	0.362126
70	0.00256856	0.345124
70	0.00253635	0.343038
70	0.00227289	0.351272
70	0.0025728	0.376249
70	0.00260711	0.344184
70	0.00249949	0.344864
70	0.00241443	0.352354
70	0.00229704	0.361132
70	0.00237743	0.360248
70	0.00255211	0.356096
70	0.00240865	0.342529
70	0.00248162	0.353831
70	0.00218057	0.342125
70	0.00271024	0.320088
70	0.00226593	0.376917
70	0.00266901	0.332384
70	0.00231496	0.366109
70	0.00247381	0.344529
70	0.00233971	0.350748
70	0.00245494	0.372822
70	0.00247233	0.382919
70	0.00254678	0.36435
70	0.00251639	0.343404
70	0.00258446	0.365429
70	0.0024487	0.37038
70	0.00268059	0.36516
70	0.00227728	0.356067
70	0.0024228	0.364843
70	0.00233026	0.343837
70	0.00271274	0.346765
70	0.00247773	0.332295
70	0.00227561	0.325175
70	0.00257507	0.342125
70	0.00242209	0.33832
70	0.00245379	0.342136
70	0.00221343	0.33328
70	0.00240144	0.323936
70	0.00244964	0.365478
70	0.00259326	0.350409
70	0.0026822	0.348089
70	0.00236215	0.342456
70	0.00221255	0.353347
70	0.00215176	0.368356
70	0.00275071	0.365001
70	0.00231806	0.344638
70	0.00235021	0.310986
70	0.00237295	0.357398
70	0.00245048	0.384606
70	0.00273632	0.362225
70	0.00270877	0.34769
70	0.00230332	0.358864
70	0.00234244	0.365382
70	0.002536	0.34635
70	0.00250533	0.333013
70	0.00283974	0.366767
70	0.00216928	0.325857
70	0.00235316	0.354311
70	0.0024346	0.370557
70	0.0021312	0.364131
70	0.00226607	0.34347
70	0.00217986	0.3531
70	0.00241174	0.341721
70	0.00252222	0.35873
70	0.00233584	0.327777
70	0.00244741	0.374836
70	0.00232626	0.354362
70	0.00244714	0.364291
70	0.00237221	0.351005
70	0.00216843	0.343583
70	0.00273159	0.341488
70	0.00255847	0.380573
70	0.00247513	0.362606
70	0.00233298	0.330025
70	0.00239817	0.365402
70	0.00253664	0.366289
70	0.00238102	0.367635
70	0.00258167	0.358218
70	0.00239274	0.345012
70	0.00237882	0.350691
70	0.00251222	0.353957
70	0.00255285	0.365387
70	0.00232631	0.30823
70	0.00268796	0.346756
70	0.00255179	0.353665
70	0.00242039	0.35968
70	0.00247334	0.367787
70	0.00247035	0.343772
70	0.0022875	0.343743
70	0.00241227	0.356322
70	0.00258638	0.372549
70	0.00266448	0.381923
70	0.00222456	0.362254
70	0.00250658	0.35385
70	0.00243197	0.340131
70	0.00229371	0.361998
70	0.00218947	0.350054
70	0.00249338	0.363047
70	0.00234768	0.370107
70	0.00250014	0.372178
70	0.00216185	0.336387
70	0.00250766	0.329638
70	0.00263868	0.351035
70	0.00235776	0.355642
70	0.00245986	0.349751
70	0.00265615	0.338776
70	0.00236266	0.35949
70	0.00253196	0.332967
70	0.00266801	0.351604
70	0.00240999	0.373197
70	0.00264699	0.340771
70	0.00257088	0.334423
70	0.00243968	0.341473
70	0.00258682	0.35137
70	0.00261412	0.356718
70	0.00226288	0.359486
70	0.00226853	0.354569
70	0.00264399	0.355662
70	0.00258458	0.357088
70	0.00253286	0.363573
70	0.00251734	0.339514
70	0.00242005	0.377657
70	0.0023324	0.366581
70	0.0023798	0.345548
70	0.00249312	0.333975
70	0.00254482	0.340725
70	0.00233777	0.363439
70	0.00222206	0.352236
70	0.00240272	0.366
70	0.00278629	0.356568
70	0.00276846	0.366749
70	0.00232574	0.339778
70	0.00237873	0.334241
70	0.00256684	0.346679
70	0.00264176	0.340263
70	0.00256841	0.346008
70	0.00273804	0.366386
70	0.00230012	0.37253
70	0.00267033	0.310112
70	0.00237001	0.355875
70	0.00269862	0.349123
70	0.0024771	0.361346
70	0.00259322	0.383872
70	0.0022151	0.343453
70	0.00259445	0.369714
70	0.00275587	0.342422
70	0.00256514	0.336296
70	0.00237356	0.331932
70	0.00293712	0.356082
70	0.00207995	0.368985
70	0.00262184	0.383622
70	0.00251473	0.360802
70	0.00239843	0.353741
70	0.00268685	0.357379
70	0.00239946	0.340689
70	0.0025407	0.341834
70	0.00213567	0.340314
70	0.00251307	0.36555
70	0.002365	0.353306
70	0.00266461	0.359944
70	0.0025078	0.365547
70	0.00256598	0.303523
70	0.00234602	0.336964
70	0.00223178	0.34747
70	0.00256832	0.348176
70	0.00249381	0.326136
70	0.00228726	0.343368
70	0.00216795	0.346466
70	0.00225113	0.352568
70	0.00240215	0.348978
70	0.00252398	0.349984
70	0.00235699	0.370053
70	0.00242421	0.366648
70	0.00252595	0.345018
70	0.00257832	0.361314
70	0.00207253	0.35488
70	0.0025793	0.340441
70	0.00283872	0.34129
70	0.00246391	0.343786
70	0.0022681	0.349955
70	0.00250366	0.367953
70	0.00240038	0.355481
70	0.00220875	0.35334
70	0.00251893	0.350927
70	0.00237054	0.359334
70	0.00242937	0.357652
70	0.00262243	0.332121
70	0.00235716	0.330482
70	0.00246102	0.346649
70	0.0023382	0.344938
70	0.00248229	0.349877
70	0.00216648	0.366157
70	0.0024378	0.348347
70	0.0025308	0.347595
70	0.00240506	0.341908
70	0.00253411	0.342036
70	0.00244885	0.362829
70	0.00254763	0.368967
70	0.00235312	0.316737
70	0.00217593	0.341061
70	0.0020276	0.341444
70	0.00250557	0.34792
70	0.00278899	0.338235
70	0.00221129	0.3547
70	0.00242978	0.36161
70	0.0024443	0.371353
70	0.00214002	0.360712
70	0.00256034	0.351859
70	0.00246623	0.374567
70	0.00246432	0.33547
70	0.00254067	0.350755
70	0.00258377	0.376394
70	0.00248703	0.329205
70	0.00228963	0.336211
70	0.00246926	0.350119
70	0.00255633	0.326772
70	0.00224603	0.341488
70	0.00264989	0.344776
70	0.00199672	0.355063
70	0.00231579	0.352107
70	0.00199648	0.33438
70	0.00262779	0.360428
70	0.00243584	0.365372
70	0.00232056	0.338302
70	0.00248208	0.361592
70	0.00239435	0.343387
70	0.00255978	0.362705
70	0.00258162	0.332903
70	0.00259945	0.397193
70	0.0025983	0.347319
70	0.00264285	0.349543
70	0.00248056	0.354448
70	0.00263768	0.335128
70	0.00228239	0.342325
70	0.00247674	0.353788
70	0.00203294	0.338507
70	0.00216042	0.363752
70	0.00268746	0.383495
70	0.00242253	0.362716
70	0.0023198	0.350527
70	0.00225225	0.349414
70	0.00231495	0.325479
70	0.0024145	0.337914
70	0.00202054	0.337978
70	0.00232329	0.339448
70	0.00225735	0.355757
70	0.00232493	0.350452
70	0.00251427	0.338442
70	0.00270826	0.350385
70	0.00267134	0.364627
70	0.00228027	0.335899
70	0.00252284	0.352266
70	0.0026782	0.360635
70	0.00269009	0.340476
70	0.00223637	0.355165
70	0.00254282	0.38026
70	0.00250279	0.356219
70	0.00237917	0.347333
70	0.00216597	0.365536
70	0.00253367	0.327118
70	0.00235753	0.354999
70	0.00240777	0.369538
70	0.00194594	0.346813
70	0.00234935	0.351531
70	0.0022522	0.359081
70	0.00241321	0.357756
70	0.00241494	0.357297
70	0.0024237	0.375245
70	0.00248108	0.346833
70	0.00237793	0.356624
70	0.00247204	0.343768
70	0.00262248	0.36533
70	0.00226596	0.381148
70	0.00222168	0.329798
70	0.00260503	0.342005
70	0.00251979	0.348953
70	0.00250685	0.342619
70	0.00222712	0.344447
70	0.00268597	0.359835
70	0.00264885	0.36995
70	0.00253813	0.331727
70	0.00265414	0.336379
70	0.00245684	0.338195
70	0.00245909	0.3615
70	0.00231038	0.356335
70	0.00228596	0.333968
70	0.00262247	0.365381
70	0.00271823	0.357911
70	0.00276374	0.372594
70	0.00248765	0.362812
70	0.00251459	0.333011
70	0.00256292	0.370281
70	0.00248825	0.321161
70	0.00235799	0.352045
70	0.002641	0.379021
70	0.00233901	0.340009
70	0.00258608	0.34679
70	0.00255014	0.340837
70	0.00242568	0.35121
70	0.00249146	0.363166
70	0.00241048	0.354318
70	0.00265147	0.322198
70	0.00245157	0.339555
70	0.00265293	0.342335
70	0.00252556	0.343356
70	0.00272823	0.351205
70	0.00224009	0.355546
70	0.00239221	0.386085
70	0.00257991	0.340012
70	0.00249339	0.330258
70	0.00270143	0.362994
70	0.00242142	0.3543
70	0.00294143	0.370221
70	0.00238443	0.350249
70	0.0025069	0.362454
70	0.00244001	0.363353
70	0.00253123	0.357299
70	0.00235121	0.342578
70	0.00252274	0.362825
70	0.00239201	0.367638
70	0.00232867	0.364096
70	0.00230775	0.358737
70	0.00226729	0.346609
70	0.00269825	0.33923
70	0.00262687	0.362727
70	0.0023942	0.348091
70	0.00188406	0.358536
70	0.00249951	0.322252
70	0.00237531	0.333269
70	0.00232325	0.309789
70	0.00249955	0.369226
70	0.00220536	0.316416
70	0.00241926	0.368661
70	0.00259152	0.327293
70	0.00239158	0.366664
70	0.00233563	0.369221
70	0.00242764	0.342849
70	0.00234836	0.349379
70	0.00211563	0.360627
70	0.0024298	0.345045
70	0.00229996	0.33727
70	0.00237031	0.358001
70	0.00238454	0.388446
70	0.00236444	0.341186
70	0.00252431	0.336658
70	0.00216737	0.317282
70	0.00257145	0.358253
70	0.00234411	0.341041
70	0.00230729	0.337002
70	0.00253053	0.371589
70	0.00224998	0.343642
70	0.002566	0.351283
70	0.0027243	0.346363
70	0.00257741	0.335725
70	0.00250698	0.364234
70	0.00220177	0.318932
70	0.00226331	0.357067
70	0.00245707	0.350614
70	0.002593	0.33441
70	0.00253069	0.360598
70	0.00212594	0.345227
70	0.0023613	0.346016
70	0.00235242	0.349999
70	0.00252164	0.35254
70	0.00262905	0.334024
70	0.00235146	0.367453
70	0.00213927	0.347533
70	0.00246496	0.335537
70	0.00241243	0.338007
70	0.00285686	0.35885
70	0.00268814	0.334919
70	0.00227028	0.355637
70	0.00279015	0.36495
70	0.00245033	0.338697
70	0.00232765	0.343086
70	0.00271941	0.331392
70	0.00244496	0.366029
70	0.00233709	0.369403
70	0.00269238	0.359055
70	0.00251555	0.340048
70	0.00245185	0.355368
70	0.00255213	0.378398
70	0.00229198	0.360874
70	0.00234705	0.388457
70	0.00250167	0.367043
70	0.00221085	0.341937
70	0.00284985	0.382185
70	0.0023774	0.350273
70	0.00267012	0.343776
70	0.00243057	0.378523
70	0.00238955	0.327269
70	0.00240337	0.321365
70	0.00212742	0.349581
70	0.00231838	0.349866
70	0.00281946	0.381942
70	0.00266049	0.37187
70	0.00276845	0.348174
70	0.0022189	0.330693
70	0.00218692	0.342448
70	0.00218637	0.32819
70	0.00235468	0.343504
70	0.00216781	0.320624
70	0.0023598	0.324979
70	0.00255434	0.351545
70	0.00237533	0.338468
70	0.00268638	0.369615
70	0.00225562	0.335638
70	0.00236803	0.324642
70	0.00262653	0.384664
70	0.00235272	0.340941
70	0.00228438	0.348349
70	0.00210527	0.348637
70	0.00210645	0.340188
70	0.00237868	0.325275
70	0.00265407	0.362329
70	0.00247851	0.367453
70	0.00264809	0.345004
70	0.00266649	0.35991
70	0.00236826	0.348204
70	0.00255313	0.366244
70	0.00214424	0.349424
70	0.00201489	0.329784
70	0.00221655	0.358831
70	0.00249805	0.367057
70	0.00234617	0.339659
70	0.00242909	0.383377
70	0.00253485	0.33954
70	0.00250316	0.361946
70	0.00242184	0.353077
70	0.00222069	0.352559
70	0.00251649	0.349273
70	0.00258495	0.359029
70	0.00250575	0.368913
70	0.00248858	0.32472
70	0.00251704	0.354997
70	0.00246526	0.336125
70	0.00261032	0.331098
70	0.0024808	0.347991
70	0.0023321	0.321186
70	0.00279109	0.352494
70	0.00246368	0.334087
70	0.00288844	0.35362
70	0.00238629	0.330715
70	0.00236053	0.369322
70	0.00253207	0.362408
70	0.0022746	0.362057
70	0.00242534	0.348249
70	0.00242796	0.357019
70	0.00254857	0.372769
70	0.00232216	0.347185
70	0.00249423	0.353579
70	0.00220438	0.341374
70	0.00259613	0.350942
70	0.00237389	0.343966
70	0.00252579	0.341614
70	0.00232446	0.342879
70	0.0024711	0.338878
70	0.00240863	0.34142
70	0.00233621	0.345663
70	0.00275232	0.323772
70	0.00214464	0.322684
70	0.00220635	0.354505
70	0.00195916	0.356607
70	0.00236479	0.334865
70	0.00255434	0.384398
70	0.00253738	0.352011
70	0.00212701	0.335844
70	0.0025792	0.361158
70	0.00237442	0.377655
70	0.00253599	0.371923
70	0.00230779	0.328192
70	0.00222445	0.347922
70	0.00238173	0.368756
70	0.00253287	0.357655
70	0.00244973	0.355092
70	0.00260935	0.367255
70	0.00231979	0.359743
70	0.00203095	0.359983
70	0.00212453	0.348483
70	0.00246169	0.336718
70	0.00268691	0.367209
70	0.00244353	0.35465
70	0.00219096	0.350947
70	0.00248338	0.349754
70	0.00251769	0.35546
70	0.00221001	0.371819
70	0.00244443	0.357707
70	0.00236926	0.352234
70	0.00225052	0.35771
70	0.00256692	0.3574
70	0.00259272	0.333815
70	0.00230926	0.362358
70	0.00280215	0.370877
70	0.00221819	0.335862
70	0.00238137	0.329299
70	0.00264516	0.340263
70	0.00274179	0.38144
70	0.00226905	0.349179
70	0.00242222	0.336104
70	0.00240091	0.354869
70	0.00242754	0.345416
70	0.00236903	0.363236
70	0.00236089	0.354053
70	0.00257162	0.360012
70	0.00227159	0.342231
70	0.00208929	0.330358
70	0.00261151	0.353378
70	0.00243816	0.352363
70	0.00246281	0.370123
70	0.00244662	0.330568
70	0.0026764	0.375851
70	0.00227749	0.345924
70	0.0027086	0.365761
70	0.00221032	0.360175
70	0.00244908	0.344247
70	0.00261313	0.34773
70	0.00234708	0.351137
70	0.00253387	0.363415
70	0.00226066	0.365488
70	0.00209812	0.339559
70	0.00250109	0.374889
70	0.0025645	0.352065
70	0.00265799	0.349235
70	0.00217483	0.34736
70	0.00232765	0.343509
70	0.00256358	0.338923
70	0.00254551	0.373335
70	0.00244415	0.331924
70	0.00259308	0.338254
70	0.00242952	0.364898
70	0.00238244	0.312959
70	0.0026668	0.362242
70	0.00239335	0.368135
70	0.00240588	0.364008
70	0.00270494	0.338048
70	0.00236242	0.353445
70	0.00245438	0.345455
70	0.00227051	0.352593
70	0.00270669	0.35239
70	0.00222683	0.366615
70	0.00271407	0.368833
70	0.00231981	0.333869
70	0.00230693	0.314464
70	0.00230936	0.355489
70	0.00241111	0.375538
70	0.0023794	0.373381
70	0.00205549	0.343865
70	0.00210236	0.33342
70	0.00229845	0.344374
70	0.00246946	0.36284
70	0.00232208	0.334866
70	0.00233407	0.3246
70	0.00261346	0.395623
70	0.00239837	0.326883
70	0.00264	0.358646
70	0.0022261	0.385203
70	0.00241684	0.349505
70	0.00261697	0.387825
70	0.00244927	0.336717
70	0.00265504	0.348651
70	0.00254695	0.376959
70	0.00239027	0.345782
70	0.00252294	0.371309
70	0.00252375	0.348892
70	0.00227988	0.358146
70	0.00237694	0.341754
70	0.00230301	0.347325
70	0.00246644	0.347368
70	0.00257527	0.34108
70	0.00240021	0.351911
70	0.00229535	0.347218
70	0.00255483	0.367787
70	0.00249979	0.352882
70	0.00255977	0.339293
70	0.00231378	0.35328
70	0.00238478	0.341592
70	0.00225099	0.343754
70	0.00255386	0.355838
70	0.00223096	0.368837
70	0.00271344	0.342206
70	0.00224009	0.345704
70	0.00258438	0.360862
70	0.00257849	0.345862
70	0.00250691	0.351515
70	0.00233225	0.350613
70	0.00227917	0.36655
70	0.00260742	0.369923
70	0.0026316	0.349529
70	0.00271044	0.340659
[truncated: 48,002 more rows]

## Sheet: Fig 4J
Fig 4J Bootstrap data
Light exposure (ms)	New lineages			Old lineages
	a	σ1	a^2 + σ1^2	a	σ1	a^2 + σ1^2
70	0.25011	0.0579034	0.065908	0.363212	0.0747511	0.137511
70	0.123686	0.0646615	0.0194794	0.37701	0.0738553	0.147591
70	0.265354	0.0691372	0.0751929	0.438863	0.0748228	0.198199
70	0.207353	0.0715299	0.0481119	0.39433	0.0684303	0.160179
70	0.0638801	0.0675327	0.00864132	0.393487	0.0717071	0.159974
70	0.213168	0.0736879	0.0508707	0.455429	0.0786196	0.213597
70	0.15656	0.0680724	0.029145	0.399042	0.0681199	0.163875
70	0.264331	0.071934	0.0750455	0.465444	0.0705834	0.22162
70	0.101412	0.0628286	0.0142318	0.288212	0.0665949	0.0875012
70	0.144462	0.0669585	0.0253526	0.370807	0.0667078	0.141948
70	0.0788757	0.060574	0.00989059	0.376443	0.0677832	0.146304
70	0.322379	0.0736131	0.109347	0.410963	0.0706737	0.173885
70	0.108929	0.0629302	0.0158256	0.27702	0.0674423	0.0812884
70	0.230894	0.0697832	0.0581817	0.350342	0.071882	0.127907
70	0.272873	0.0733533	0.0798402	0.426636	0.0744753	0.187565
70	0.106357	0.0659311	0.0156587	0.374835	0.0693158	0.145306
70	0.128946	0.0675829	0.0211945	0.380393	0.0626729	0.148627
70	0.186065	0.0712986	0.0397038	0.37313	0.0724153	0.14447
70	0.213924	0.0694609	0.0505885	0.493069	0.0728374	0.248422
70	0.134212	0.0666285	0.0224522	0.426568	0.0712489	0.187036
70	0.208614	0.0627746	0.0474606	0.41962	0.0725913	0.18135
70	0.162536	0.0718281	0.0315772	0.333097	0.0754017	0.116639
70	0.132706	0.0695972	0.0224546	0.363344	0.0734402	0.137412
70	0.176467	0.0673055	0.0356706	0.32269	0.073798	0.109575
70	0.235996	0.0693293	0.0605006	0.469376	0.0711721	0.22538
70	0.157245	0.0777812	0.0307759	0.44611	0.0691889	0.203801
70	0.245746	0.0702392	0.0653247	0.379332	0.0725203	0.149152
70	0.216296	0.0643699	0.0509276	0.434733	0.0721185	0.194193
70	0.208091	0.0742391	0.0488131	0.436056	0.0725103	0.195402
70	0.1996	0.0710862	0.0448933	0.514503	0.0681477	0.269358
70	0.0802065	0.064692	0.0106181	0.300468	0.0714189	0.0953815
70	0.22419	0.0739151	0.0557246	0.395214	0.0729809	0.16152
70	0.140067	0.0679043	0.0242298	0.329202	0.0744455	0.113916
70	0.0952866	0.065206	0.0133314	0.347721	0.0741504	0.126408
70	0.275357	0.0669428	0.0803029	0.37236	0.072085	0.143848
70	0.206228	0.0678019	0.047127	0.419119	0.070008	0.180562
70	0.0839271	0.06833	0.0117127	0.418504	0.0750394	0.180776
70	0.230582	0.0687068	0.0578888	0.404679	0.0717423	0.168912
70	0.289342	0.0752545	0.0893818	0.391275	0.078728	0.159294
70	0.306861	0.0719239	0.0993369	0.466685	0.072644	0.223072
70	0.322176	0.07537	0.109478	0.414171	0.0764535	0.177383
70	0.235442	0.0767093	0.061317	0.442429	0.0750962	0.201383
70	0.151158	0.0649376	0.0270657	0.415326	0.0716126	0.177624
70	0.22515	0.0686727	0.0554086	0.466805	0.0692941	0.222709
70	0.235991	0.0805102	0.0621735	0.449935	0.0718591	0.207605
70	0.231875	0.070954	0.0588003	0.473371	0.0722207	0.229296
70	0.251898	0.0729172	0.0687697	0.407249	0.0727833	0.171149
70	0.304788	0.0705551	0.0978736	0.477642	0.0767186	0.234028
70	0.202552	0.0642347	0.0451535	0.343915	0.0709628	0.123313
70	0.216148	0.0703043	0.0516626	0.432495	0.0695181	0.191885
70	0.163727	0.0632968	0.030813	0.4497	0.069919	0.207119
70	0.160655	0.0679678	0.0304296	0.430236	0.0754245	0.190792
70	0.212648	0.0693026	0.0500218	0.41661	0.0772048	0.179525
70	0.152365	0.0735088	0.0286187	0.414659	0.0736972	0.177374
70	0.160323	0.0695295	0.0305377	0.336374	0.0705607	0.118126
70	0.194042	0.0690317	0.0424175	0.436455	0.0689349	0.195245
70	0.250524	0.0753987	0.068447	0.447001	0.0764672	0.205658
70	0.198808	0.0718727	0.0446905	0.412776	0.0757277	0.176119
70	0.193934	0.0675585	0.0421745	0.355145	0.0712276	0.131201
70	0.29387	0.0735089	0.0917629	0.412708	0.0778234	0.176385
70	0.246092	0.0756242	0.0662803	0.472239	0.0765375	0.228868
70	0.248895	0.0669375	0.0664296	0.42537	0.0704044	0.185896
70	0.212886	0.0642079	0.0494433	0.394674	0.0783644	0.161909
70	0.198377	0.0708511	0.0443733	0.350058	0.0715621	0.127662
70	0.162066	0.068304	0.0309309	0.456695	0.075834	0.214321
70	0.185412	0.0677896	0.0389729	0.424085	0.0766317	0.18572
70	0.174401	0.0656147	0.0347209	0.37917	0.0714656	0.148877
70	0.17366	0.0713779	0.0352527	0.359881	0.073471	0.134913
70	0.214247	0.0708314	0.0509191	0.432395	0.0772686	0.192936
70	0.206434	0.0708171	0.0476299	0.419685	0.0784862	0.182295
70	0.148176	0.066367	0.0263607	0.380721	0.0759499	0.150717
70	0.19384	0.0651512	0.0418186	0.416714	0.0713203	0.178737
70	0.208891	0.0727743	0.0489315	0.387663	0.0689041	0.15503
70	0.163919	0.0712149	0.0319409	0.370946	0.0736679	0.143028
70	0.286374	0.0700023	0.0869101	0.445268	0.0735951	0.20368
70	0.19861	0.0743383	0.0449721	0.453366	0.0685086	0.210234
70	0.235179	0.0772792	0.0612813	0.421124	0.0733463	0.182725
70	0.182317	0.0683994	0.0379179	0.42544	0.0710535	0.186048
70	0.233694	0.0728409	0.0599187	0.376216	0.0769825	0.147465
70	0.127417	0.0727296	0.0215248	0.485771	0.0704234	0.240933
70	0.155089	0.0755809	0.0297651	0.403782	0.0694642	0.167865
70	0.164979	0.0715194	0.032333	0.433953	0.0720525	0.193507
70	0.272881	0.0745902	0.0800279	0.421787	0.0772337	0.183869
70	0.163517	0.0697776	0.0316067	0.357927	0.0803173	0.134563
70	0.161182	0.0692015	0.0307685	0.389002	0.0716555	0.156457
70	0.171601	0.0666413	0.0338878	0.486953	0.0713667	0.242217
70	0.194258	0.0726326	0.0430115	0.448837	0.0725122	0.206712
70	0.153683	0.0747158	0.0292009	0.404498	0.07402	0.169098
70	0.286039	0.0745533	0.0873768	0.432342	0.0710161	0.191963
70	0.198799	0.0671559	0.0440311	0.461283	0.0687013	0.217501
70	0.240116	0.0754223	0.0633444	0.417436	0.0791559	0.180519
70	0.146683	0.0646336	0.0256934	0.408909	0.0766519	0.173082
70	0.100766	0.0644738	0.0143107	0.375737	0.0725255	0.146438
70	0.232233	0.0723989	0.0591739	0.386637	0.072995	0.154816
70	0.196379	0.0739969	0.0440404	0.43016	0.0706409	0.190028
70	0.177719	0.0707295	0.0365866	0.435625	0.0755524	0.195477
70	0.146856	0.0635526	0.0256055	0.434988	0.0701907	0.194141
70	0.275129	0.0739581	0.0811657	0.420446	0.0745301	0.182329
70	0.284591	0.0763957	0.0868283	0.409493	0.0779402	0.173759
70	0.268706	0.0739434	0.0776703	0.432984	0.0694535	0.192299
70	0.126986	0.0731337	0.0214741	0.375767	0.0719189	0.146373
70	0.280638	0.0676099	0.0833288	0.34556	0.0695706	0.124251
70	0.254316	0.0716342	0.0698079	0.507464	0.0744808	0.263067
70	0.186939	0.0672162	0.0394642	0.384995	0.0730458	0.153557
70	0.225393	0.0727433	0.0560936	0.415398	0.0728636	0.177864
70	0.280939	0.0691595	0.0837099	0.469147	0.0703119	0.225043
70	0.192331	0.0659797	0.0413445	0.340082	0.0739354	0.121122
70	0.192794	0.0634872	0.0412003	0.368119	0.0639769	0.139605
70	0.219858	0.0666522	0.0527803	0.483121	0.0732231	0.238768
70	0.34349	0.0763328	0.123812	0.466823	0.0793153	0.224215
70	0.100569	0.0674562	0.0146645	0.427574	0.0703699	0.187771
70	0.216254	0.0769005	0.0526796	0.412298	0.0718993	0.175159
70	0.291946	0.0699774	0.0901294	0.345882	0.0765907	0.125501
70	0.156958	0.0635682	0.0286768	0.395923	0.0678793	0.161363
70	0.245556	0.0720185	0.0654842	0.464564	0.0708284	0.220836
70	0.120284	0.0616483	0.0182687	0.371727	0.0728394	0.143487
70	0.273193	0.0740619	0.0801196	0.477833	0.0708385	0.233342
70	0.207665	0.0700886	0.0480372	0.392594	0.0734044	0.159518
70	0.191509	0.0694914	0.0415047	0.374191	0.0698439	0.144897
70	0.206548	0.0710345	0.0477081	0.390597	0.0778005	0.158619
70	0.256267	0.0675801	0.0702397	0.396181	0.0716021	0.162086
70	0.219936	0.0757634	0.0541119	0.431314	0.0728963	0.191346
70	0.299328	0.0635998	0.0936422	0.345972	0.0703162	0.124641
70	0.203143	0.0763595	0.0470979	0.479754	0.076457	0.236009
70	0.279299	0.0679459	0.0826244	0.494198	0.0737683	0.249674
70	0.12886	0.0748702	0.0222105	0.381102	0.0753243	0.150912
70	0.142689	0.0612857	0.0241162	0.415605	0.0660524	0.17709
70	0.226954	0.0742108	0.0570154	0.448608	0.074072	0.206735
70	0.137846	0.062719	0.0229351	0.436987	0.0687	0.195678
70	0.147456	0.0617804	0.0255601	0.401292	0.0717478	0.166183
70	0.256242	0.0719711	0.0708397	0.433177	0.0714186	0.192743
70	0.187079	0.0717997	0.0401537	0.445641	0.0791455	0.20486
70	0.28517	0.0777459	0.0873664	0.325807	0.0743577	0.111679
70	0.189871	0.0689551	0.0408057	0.307414	0.0762412	0.100316
70	0.134221	0.0739631	0.0234859	0.3312	0.0796156	0.116032
70	0.240404	0.0686834	0.0625114	0.321818	0.0725319	0.108828
70	0.182288	0.0651881	0.0374785	0.534133	0.0727142	0.290585
70	0.23827	0.0750839	0.0624103	0.444506	0.075877	0.203343
70	0.177091	0.0798589	0.0377386	0.365498	0.0736682	0.139016
70	0.0879988	0.0658181	0.0120758	0.413332	0.0738669	0.1763
70	0.313395	0.0751265	0.10386	0.413895	0.0730622	0.176647
70	0.302869	0.0781804	0.0978417	0.457011	0.0716553	0.213993
70	0.162939	0.072445	0.0317973	0.472865	0.0778202	0.229658
70	0.128614	0.0653033	0.020806	0.39795	0.0694451	0.163187
70	0.229841	0.0750953	0.0584661	0.40681	0.073703	0.170927
70	0.259261	0.0653368	0.0714851	0.414839	0.0753184	0.177764
70	0.188118	0.0695643	0.0402276	0.473634	0.0681888	0.228979
70	0.226982	0.0686545	0.0562342	0.399558	0.0773213	0.165625
70	0.222241	0.0682364	0.0540475	0.362901	0.0750227	0.137326
70	0.168477	0.0658019	0.0327143	0.371996	0.0737004	0.143813
70	0.182768	0.0699596	0.0382983	0.309821	0.0731783	0.101344
70	0.24443	0.0703471	0.0646949	0.361191	0.0747594	0.136048
70	0.175093	0.0712861	0.0357392	0.389278	0.0750575	0.157171
70	0.259507	0.0680877	0.0719801	0.439442	0.0741669	0.19861
70	0.200278	0.0692729	0.04491	0.385741	0.0724024	0.154039
70	0.194335	0.0700847	0.0426779	0.419894	0.0684799	0.181001
70	0.307073	0.0741052	0.0997857	0.398754	0.078854	0.165223
70	0.294147	0.0727997	0.0918225	0.425447	0.0736463	0.186429
70	0.223814	0.0734422	0.0554865	0.401746	0.0692941	0.166201
70	0.110235	0.0669582	0.016635	0.335239	0.0782183	0.118503
70	0.138337	0.0746778	0.0247138	0.382059	0.0718147	0.151127
70	0.277254	0.0680448	0.0814996	0.365936	0.0767813	0.139805
70	0.144016	0.0671974	0.0252561	0.371979	0.0730395	0.143703
70	0.234962	0.0739212	0.0606717	0.466643	0.0760278	0.223536
70	0.228443	0.0725432	0.0574489	0.427234	0.0794011	0.188833
70	0.204814	0.0720469	0.0471395	0.387618	0.0776607	0.156279
70	0.210666	0.0728684	0.0496901	0.30626	0.0716754	0.0989327
70	0.258957	0.0600646	0.0706664	0.415496	0.0754341	0.178327
70	0.179757	0.0688225	0.037049	0.370394	0.0721794	0.142401
70	0.247355	0.0723369	0.066417	0.383527	0.0763119	0.152917
70	0.281053	0.0720806	0.0841863	0.46614	0.0732795	0.222656
70	0.182012	0.0678971	0.0377384	0.363039	0.0769099	0.137712
70	0.200699	0.0735006	0.0456825	0.376082	0.0687532	0.146165
70	0.128373	0.0707919	0.0214912	0.392907	0.0723712	0.159614
70	0.128726	0.0698982	0.021456	0.42694	0.0769578	0.188201
70	0.231427	0.0741843	0.0590618	0.381376	0.0745684	0.151008
70	0.184383	0.0642678	0.0381274	0.321289	0.0731487	0.108578
70	0.150976	0.0783575	0.0289335	0.430715	0.0758309	0.191265
70	0.237026	0.0735244	0.0615871	0.494218	0.067486	0.248806
70	0.210611	0.0805666	0.0508481	0.340596	0.0731949	0.121363
70	0.167026	0.0699237	0.0327869	0.341623	0.0715479	0.121825
70	0.232191	0.0713589	0.0590045	0.349473	0.0781338	0.128236
70	0.153187	0.0637322	0.027528	0.371745	0.0687026	0.142914
70	0.180806	0.0690757	0.0374622	0.389404	0.0774781	0.157638
70	0.32469	0.0728104	0.110725	0.416765	0.081465	0.180329
70	0.119547	0.0701987	0.0192193	0.296213	0.0741708	0.0932437
70	0.304729	0.079362	0.0991584	0.46936	0.0763279	0.226124
70	0.236152	0.0694704	0.0605939	0.478581	0.07068	0.234036
70	0.146612	0.0679756	0.0261157	0.316061	0.0701213	0.104811
70	0.27048	0.0705167	0.0781319	0.331239	0.0706254	0.114707
70	0.278794	0.0724992	0.0829825	0.389943	0.071284	0.157137
70	0.159905	0.0632642	0.029572	0.441349	0.0676047	0.19936
70	0.172392	0.073577	0.0351327	0.334525	0.0693475	0.116716
70	0.195364	0.06844	0.042851	0.367152	0.0680223	0.139427
70	0.241588	0.0693055	0.0631681	0.374596	0.0736392	0.145745
70	0.181437	0.0653652	0.0371919	0.443908	0.0722115	0.202269
70	0.209143	0.0667941	0.0482022	0.46276	0.0717795	0.219299
70	0.302886	0.0714013	0.096838	0.498092	0.0732656	0.253463
70	0.149817	0.0719522	0.0276224	0.377818	0.0773722	0.148733
70	0.217079	0.072033	0.0523121	0.398086	0.0727442	0.163764
70	0.251443	0.0697735	0.068092	0.351104	0.0728619	0.128583
70	0.167849	0.0633162	0.0321822	0.478704	0.0724833	0.234411
70	0.210663	0.0751736	0.05003	0.355521	0.0715585	0.131516
70	0.30191	0.0715095	0.096263	0.442117	0.0703709	0.20042
70	0.197367	0.0731055	0.0442982	0.391294	0.0738174	0.15856
70	0.153707	0.0693822	0.0284398	0.447204	0.0720635	0.205184
70	0.286381	0.0724781	0.0872673	0.401291	0.0663416	0.165436
70	0.365562	0.070083	0.138547	0.4177	0.0775328	0.180485
70	0.215048	0.0774632	0.052246	0.388066	0.0735894	0.156011
70	0.162331	0.0687691	0.0310804	0.442956	0.0712933	0.201292
70	0.186177	0.0705216	0.0396353	0.37544	0.070478	0.145923
70	0.0502539	0.0655288	0.00681948	0.327725	0.0664141	0.111814
70	0.253911	0.0763457	0.0702997	0.384738	0.0696356	0.152873
70	0.276972	0.0712203	0.0817859	0.413909	0.0757356	0.177056
70	0.138591	0.0723038	0.0244354	0.343418	0.069722	0.122797
70	0.234574	0.0661762	0.0594043	0.385436	0.07411	0.154053
70	0.205703	0.0634977	0.0463458	0.481964	0.0777576	0.238335
70	0.266133	0.0743523	0.0763553	0.415157	0.0729674	0.17768
70	0.29963	0.0729154	0.0950947	0.471479	0.0716593	0.227427
70	0.13984	0.0688991	0.0243024	0.336844	0.0745588	0.119023
70	0.246985	0.0696873	0.0658578	0.348336	0.0668729	0.12581
70	0.180635	0.0755964	0.0383439	0.37489	0.0735421	0.145951
70	0.180261	0.0688033	0.0372281	0.340759	0.0735028	0.121519
70	0.265676	0.0738216	0.0760332	0.457492	0.0716115	0.214428
70	0.244259	0.0748919	0.0652713	0.410306	0.0757772	0.174093
70	0.269047	0.0683988	0.0770647	0.488786	0.0770181	0.244844
70	0.3669	0.0690402	0.139383	0.479781	0.0662199	0.234575
70	0.186321	0.0663808	0.0391219	0.309685	0.0698873	0.100789
70	0.219822	0.0709886	0.0533611	0.452225	0.0681415	0.20915
70	0.177255	0.0735243	0.036825	0.349723	0.0730311	0.127639
70	0.30263	0.0753279	0.0972595	0.417771	0.0757572	0.180272
70	0.263836	0.0685033	0.0743024	0.346958	0.077368	0.126365
70	0.119164	0.0709898	0.0192397	0.458544	0.0716355	0.215394
70	0.226804	0.0699564	0.056334	0.413088	0.0731155	0.175988
70	0.181027	0.0694378	0.0375923	0.44465	0.0698911	0.202599
70	0.248635	0.0780877	0.0679171	0.43999	0.07766	0.199622
70	0.204215	0.0688012	0.0464373	0.406815	0.0744401	0.17104
70	0.190005	0.0678778	0.0407092	0.303039	0.0735994	0.0972496
70	0.239884	0.0677759	0.062138	0.361019	0.0710211	0.135379
70	0.213864	0.0717385	0.0508842	0.433817	0.0769462	0.194118
70	0.187135	0.0698441	0.0398976	0.445127	0.081092	0.204714
70	0.249622	0.0733999	0.0676987	0.429567	0.0741781	0.19003
70	0.229251	0.06887	0.0572991	0.402131	0.0723799	0.166948
70	0.055161	0.0687242	0.00776575	0.373133	0.0682749	0.14389
70	0.247953	0.0626673	0.0654081	0.326576	0.0708837	0.111676
70	0.157378	0.0677289	0.0293551	0.380824	0.0695793	0.149868
70	0.266305	0.0724443	0.0761666	0.420367	0.0705054	0.181679
70	0.156996	0.0718162	0.0298053	0.488629	0.0738471	0.244211
70	0.263916	0.0726657	0.0749317	0.453371	0.0681954	0.210196
70	0.288161	0.0694583	0.0878613	0.410631	0.0728391	0.173923
70	0.188441	0.0722533	0.0407307	0.40614	0.0706938	0.169947
70	0.297342	0.0730377	0.0937468	0.405193	0.0732893	0.169553
70	0.130116	0.0656656	0.0212421	0.335264	0.068761	0.11713
70	0.204135	0.068394	0.0463489	0.430177	0.0706823	0.190048
70	0.156484	0.0654664	0.0287732	0.33278	0.072506	0.115999
70	0.182065	0.0677973	0.0377443	0.479729	0.0794601	0.236454
70	0.169759	0.0707128	0.0338184	0.456914	0.0717559	0.213919
70	0.226145	0.072357	0.056377	0.430783	0.0743379	0.1911
70	0.289139	0.0645762	0.0877714	0.374742	0.0694674	0.145257
70	0.235149	0.0703218	0.0602401	0.349475	0.0781198	0.128235
70	0.0601177	0.0740301	0.00909459	0.346518	0.076462	0.125921
70	0.173337	0.0717885	0.0351993	0.411179	0.0732595	0.174435
70	0.355411	0.0818586	0.133018	0.44102	0.0778343	0.200557
70	0.25074	0.0750241	0.0684993	0.474046	0.074774	0.23031
70	0.236274	0.0763046	0.0616479	0.441429	0.0762053	0.200667
70	0.226829	0.0691373	0.0562313	0.402798	0.0696094	0.167092
70	0.160658	0.0763358	0.0316382	0.335601	0.0747539	0.118216
70	0.196633	0.0717731	0.0438161	0.403605	0.0745584	0.168456
70	0.194504	0.0753924	0.0435159	0.477016	0.0724522	0.232793
70	0.252655	0.069011	0.0685968	0.429574	0.0734351	0.189926
70	0.156663	0.0726947	0.0298278	0.340586	0.076233	0.12181
70	0.148073	0.0632055	0.0259205	0.369602	0.07428	0.142123
70	0.277641	0.0662039	0.0814674	0.443082	0.0721729	0.20153
70	0.0215898	0.069184	0.00525254	0.355823	0.0710453	0.131657
70	0.174458	0.0643527	0.0345767	0.356753	0.0687474	0.131999
70	0.194704	0.0663107	0.0423069	0.420756	0.0713052	0.18212
70	0.173647	0.0703053	0.0350961	0.353856	0.0655158	0.129506
70	0.191989	0.0659983	0.0412157	0.42516	0.0732455	0.186126
70	0.152658	0.0686368	0.0280155	0.452099	0.0736313	0.209815
70	0.133814	0.069368	0.0227181	0.391981	0.0683668	0.158323
70	0.1995	0.0690475	0.044568	0.409473	0.0716325	0.172799
70	0.284741	0.0766256	0.0869488	0.461427	0.071879	0.218081
70	0.290274	0.0743176	0.0897819	0.403806	0.0710038	0.168101
70	0.216069	0.0689954	0.0514461	0.411883	0.0707197	0.174649
70	0.268402	0.0740337	0.0775204	0.508242	0.0738513	0.263764
70	0.260058	0.0742495	0.0731432	0.472182	0.0723675	0.228193
70	0.215482	0.0694458	0.0512553	0.367153	0.072448	0.14005
70	0.173859	0.0747253	0.035811	0.404767	0.0742893	0.169355
70	0.233166	0.0745848	0.0599292	0.411455	0.0752898	0.174964
70	0.288788	0.0781611	0.0895079	0.411452	0.0731145	0.174638
70	0.127033	0.0671256	0.0206433	0.468982	0.0691624	0.224727
70	0.260283	0.0766243	0.0736187	0.43676	0.0750727	0.196395
70	0.218535	0.077172	0.0537129	0.382843	0.0772366	0.152534
70	0.248516	0.0779784	0.067841	0.424426	0.0759627	0.185908
70	0.117462	0.0684211	0.0184788	0.339171	0.0791827	0.121307
70	0.286197	0.0674151	0.0864535	0.439813	0.0692014	0.198224
70	0.198472	0.0701765	0.0443159	0.346895	0.0669707	0.124821
70	0.235756	0.0706804	0.0605765	0.403877	0.0755281	0.168821
70	0.237701	0.0697945	0.0613733	0.493683	0.0723462	0.248957
70	0.0998922	0.0719536	0.0151558	0.351528	0.0704753	0.128539
70	0.263947	0.0757289	0.0754029	0.402834	0.0761651	0.168076
70	0.328461	0.0753906	0.11357	0.42277	0.0742085	0.184241
70	0.228954	0.0698637	0.0573011	0.364206	0.0698815	0.137529
70	0.181316	0.0686871	0.0375934	0.433471	0.0709742	0.192934
70	0.272591	0.0735205	0.0797112	0.410686	0.0705718	0.173644
70	0.23119	0.0751489	0.0590962	0.476417	0.0729662	0.232297
70	0.216925	0.0663712	0.0514617	0.424798	0.0701086	0.185369
70	0.289017	0.0715958	0.0886567	0.413451	0.0674434	0.17549
70	0.144178	0.0733779	0.0261717	0.280142	0.0692584	0.0832763
70	0.231527	0.0762306	0.0594157	0.453903	0.0733028	0.211401
70	0.148255	0.0715935	0.0271052	0.374236	0.0764161	0.145892
70	0.0692303	0.0638659	0.00887169	0.358647	0.0743898	0.134162
70	0.350683	0.0772626	0.128948	0.505821	0.0688603	0.260596
70	0.18223	0.0683142	0.0378745	0.335566	0.0695968	0.117448
70	0.201962	0.0772375	0.0467541	0.48858	0.0764204	0.244551
70	0.253217	0.0713754	0.0692133	0.36923	0.0752471	0.141993
70	0.240362	0.0712023	0.0628438	0.433094	0.0677516	0.192161
70	0.0985	0.064527	0.013866	0.314778	0.0719398	0.104261
70	0.211987	0.0675151	0.0494968	0.406545	0.0757705	0.17102
70	0.25139	0.0761772	0.0689999	0.446032	0.0717669	0.204095
70	0.180405	0.0682047	0.0371978	0.459143	0.0710903	0.215866
70	0.226178	0.072743	0.0564482	0.495432	0.0701324	0.250371
70	0.224032	0.0723465	0.0554241	0.420605	0.0761611	0.182709
70	0.176705	0.0728121	0.0365263	0.3812	0.0759187	0.151077
70	0.287612	0.0725957	0.0879911	0.427882	0.0718163	0.18824
70	0.128006	0.068558	0.0210858	0.405787	0.0703421	0.169611
70	0.168666	0.0705362	0.0334236	0.431444	0.071262	0.191222
70	0.135266	0.0653938	0.0225731	0.393575	0.0647315	0.159091
70	0.242152	0.0717609	0.0637872	0.495014	0.072713	0.250326
70	0.212152	0.0724928	0.0502635	0.387709	0.0722234	0.155535
70	0.212393	0.0705146	0.0500829	0.376555	0.0771681	0.147749
70	0.147133	0.0693025	0.026451	0.487413	0.0770652	0.24351
70	0.15554	0.0696167	0.0290391	0.313204	0.0696686	0.102951
70	0.258393	0.0774247	0.0727617	0.381017	0.0774058	0.151166
70	0.316207	0.0721119	0.105187	0.492894	0.0697329	0.247807
70	0.251093	0.0717233	0.068192	0.424367	0.0731059	0.185432
70	0.112052	0.0699367	0.0174468	0.330137	0.0693346	0.113798
70	0.258129	0.0714543	0.0717362	0.474795	0.0703877	0.230385
70	0.157943	0.0655826	0.0292472	0.38351	0.0721909	0.152292
70	0.170044	0.070906	0.0339426	0.369173	0.0689619	0.141044
70	0.243421	0.0714108	0.0643534	0.415652	0.0723058	0.177995
70	0.302994	0.0747381	0.097391	0.439397	0.0785185	0.199235
70	0.32546	0.0668362	0.110391	0.510814	0.0679991	0.265555
70	0.322086	0.0736925	0.10917	0.439758	0.0753874	0.19907
70	0.318699	0.0686583	0.106283	0.4558	0.0697789	0.212623
70	0.208473	0.0744638	0.0490056	0.407814	0.0757062	0.172044
70	0.235593	0.0724067	0.0607466	0.367883	0.0764111	0.141177
70	0.133994	0.0634696	0.0219829	0.408548	0.0755471	0.172619
70	0.265681	0.0768417	0.0764908	0.447228	0.0700857	0.204925
70	0.185839	0.0708317	0.0395531	0.341791	0.0734673	0.122218
70	0.231684	0.0672311	0.0581977	0.390221	0.0724898	0.157527
70	0.288335	0.0704877	0.0881055	0.398664	0.072001	0.164117
70	0.162486	0.0718035	0.0315573	0.416328	0.0769333	0.179247
70	0.184271	0.0686085	0.0386628	0.443624	0.0741715	0.202304
70	0.158354	0.070436	0.0300371	0.354505	0.0716577	0.130808
70	0.177765	0.0706619	0.0365934	0.401855	0.0732573	0.166854
70	0.21737	0.0660012	0.0516058	0.421284	0.0748233	0.183079
70	0.229596	0.0708206	0.0577297	0.365999	0.073062	0.139294
70	0.207272	0.0684206	0.0476432	0.394885	0.0710657	0.160985
70	0.144903	0.0601784	0.0246182	0.307305	0.0675583	0.0990006
70	0.122532	0.0639763	0.0191069	0.412434	0.068514	0.174796
70	0.14912	0.0720387	0.0274264	0.435593	0.0738699	0.195198
70	0.185571	0.0715547	0.0395565	0.408251	0.0739992	0.172144
70	0.244445	0.0650167	0.0639807	0.41534	0.0745519	0.178065
70	0.207974	0.0721191	0.0484545	0.448166	0.0722982	0.20608
70	0.149505	0.0683378	0.0270217	0.382869	0.0739435	0.152056
70	0.20873	0.0807234	0.0500844	0.358337	0.0732015	0.133764
70	0.228098	0.0661546	0.0564052	0.341974	0.0714972	0.122058
70	0.113841	0.0638473	0.0170362	0.369074	0.0701676	0.141139
70	0.178196	0.0697375	0.0366172	0.443572	0.0758807	0.202514
70	0.149323	0.0670911	0.0267986	0.31105	0.0739428	0.10222
70	0.173791	0.07462	0.0357716	0.377885	0.0724252	0.148042
70	0.126596	0.064408	0.020175	0.349691	0.0713538	0.127375
70	0.129364	0.0705634	0.0217143	0.44629	0.0750689	0.20481
70	0.246068	0.069846	0.0654277	0.415008	0.0723225	0.177462
70	0.183826	0.0628612	0.0377437	0.389456	0.073486	0.157077
70	0.295584	0.0763626	0.0932012	0.406283	0.0720225	0.170253
70	0.233015	0.0725638	0.0595615	0.458301	0.0726617	0.21532
70	0.178186	0.0742616	0.0372649	0.53446	0.0743588	0.291177
70	0.224094	0.0681401	0.0548613	0.414593	0.0682752	0.176549
70	0.189321	0.073065	0.041181	0.380704	0.0739862	0.150409
70	0.0933126	0.06416	0.0128238	0.246203	0.0678928	0.0652254
70	0.145956	0.0729003	0.0266176	0.348956	0.0748534	0.127373
70	0.21258	0.0731924	0.0505473	0.411344	0.0673468	0.17374
70	0.148754	0.0712699	0.0272072	0.397001	0.0749006	0.16322
70	0.132409	0.0749256	0.023146	0.469234	0.0695285	0.225015
70	0.213887	0.0676086	0.0503184	0.339536	0.0715941	0.12041
70	0.266944	0.0737101	0.0766921	0.412339	0.0727934	0.175322
70	0.207591	0.0702587	0.0480304	0.387112	0.0772638	0.155825
70	0.264279	0.0747558	0.0754321	0.354753	0.0721941	0.131062
70	0.225154	0.0721801	0.0559043	0.364855	0.0705677	0.138099
70	0.264983	0.0776593	0.0762467	0.439561	0.0768137	0.199114
70	0.178167	0.0712803	0.0368242	0.352327	0.0783174	0.130268
70	0.216938	0.0828192	0.0539213	0.427968	0.0751794	0.188809
70	0.21789	0.0710139	0.0525192	0.370068	0.0788628	0.14317
70	0.0945884	0.0668266	0.0134128	0.28758	0.068856	0.0874432
70	0.375083	0.070825	0.145704	0.379961	0.0778219	0.150427
70	0.137543	0.0643449	0.0230583	0.387977	0.0720869	0.155723
70	0.171541	0.0697087	0.0342857	0.383294	0.0695899	0.151757
70	0.0751641	0.0647789	0.00984596	0.436571	0.0739202	0.196058
70	0.283844	0.0703856	0.0855217	0.486301	0.0743298	0.242013
70	0.252006	0.0747567	0.0690955	0.4489	0.0732639	0.206879
70	0.229162	0.0623088	0.0563974	0.358234	0.0697181	0.133192
70	0.303511	0.0693636	0.0969304	0.434723	0.0732698	0.194353
70	0.206813	0.0682024	0.0474232	0.382655	0.0747853	0.152018
70	0.139448	0.0661437	0.0238208	0.36098	0.0709447	0.13534
70	0.222167	0.0681474	0.0540021	0.45901	0.0718916	0.215859
70	0.162563	0.0651138	0.0306666	0.463757	0.0755978	0.220786
70	0.246745	0.0767066	0.066767	0.445504	0.0763937	0.20431
70	0.225808	0.0734239	0.0563805	0.409509	0.0750456	0.173329
70	0.178092	0.0667203	0.0361683	0.36253	0.0720495	0.136619
70	0.24952	0.0700145	0.0671621	0.298176	0.0764075	0.0947473
70	0.249024	0.0689074	0.0667614	0.400135	0.0761042	0.1659
70	0.224823	0.0640219	0.0546442	0.446514	0.073186	0.204731
70	0.197251	0.0683821	0.0435841	0.5351	0.0703951	0.291287
70	0.280594	0.0737566	0.0841732	0.404741	0.0694394	0.168637
70	0.205175	0.0669396	0.0465776	0.450588	0.0749339	0.208645
70	0.255997	0.0706569	0.0705271	0.472141	0.0754808	0.228615
70	0.254359	0.0741504	0.0701967	0.401139	0.0748886	0.166521
70	0.259123	0.0741491	0.072643	0.493774	0.0697355	0.248676
70	0.366966	0.0776112	0.140688	0.451381	0.0692177	0.208536
70	0.33525	0.0675556	0.116957	0.421277	0.0681443	0.182118
70	0.12561	0.0715038	0.0208906	0.364374	0.0757336	0.138504
70	0.145193	0.0685821	0.0257846	0.36131	0.0745905	0.136109
70	0.297006	0.0735467	0.0936214	0.438157	0.0738635	0.197438
70	0.224178	0.0682483	0.0549135	0.347666	0.0772424	0.126838
70	0.138345	0.0659986	0.0234952	0.403482	0.0717375	0.167944
70	0.360844	0.0768275	0.136111	0.520353	0.0727034	0.276054
70	0.187453	0.0662888	0.0395327	0.466965	0.0713219	0.223143
70	0.202909	0.0731681	0.0465258	0.374525	0.0743751	0.145801
70	0.148369	0.0656371	0.0263215	0.362999	0.0762281	0.137579
70	0.133343	0.0670434	0.022275	0.40004	0.072014	0.165218
70	0.259966	0.0694588	0.072407	0.481614	0.0724195	0.237196
70	0.263409	0.0680183	0.0740108	0.485633	0.0736933	0.24127
70	0.175149	0.0630715	0.034655	0.351483	0.0713793	0.128635
70	0.228365	0.0701168	0.0570671	0.388879	0.0726869	0.15651
70	0.165915	0.0770587	0.0334659	0.441475	0.0680969	0.199537
70	0.247128	0.0674156	0.0656173	0.423645	0.0696536	0.184326
70	0.254432	0.0694431	0.0695581	0.416919	0.075163	0.179471
70	0.252243	0.066239	0.0680142	0.435212	0.070017	0.194312
70	0.215052	0.0748274	0.0518465	0.377423	0.0687162	0.14717
70	0.302211	0.0765765	0.0971957	0.451721	0.0735961	0.209468
70	0.314056	0.0748236	0.10423	0.525639	0.067395	0.280838
70	0.179528	0.0754425	0.0379219	0.417451	0.0768636	0.180173
70	0.135008	0.0694673	0.023053	0.384687	0.0729779	0.15331
70	0.188513	0.0668717	0.040009	0.450734	0.0766427	0.209036
70	0.169298	0.0681941	0.0333123	0.355372	0.0718684	0.131455
70	0.218215	0.0735437	0.0530263	0.398083	0.0755774	0.164182
70	0.154199	0.0725732	0.0290442	0.376009	0.0691845	0.146169
70	0.0796834	0.0647632	0.0105437	0.372626	0.0709026	0.143877
70	0.173936	0.0704951	0.0352233	0.386784	0.0738159	0.155051
70	0.174348	0.0742935	0.0359168	0.372632	0.0754687	0.14455
70	0.213768	0.0762745	0.0515147	0.38674	0.0761319	0.155364
70	0.253474	0.0754229	0.0699378	0.452965	0.0714884	0.210288
70	0.252651	0.0760814	0.069621	0.330545	0.0745806	0.114822
70	0.195484	0.0709943	0.0432542	0.422116	0.0710074	0.183224
70	0.172313	0.0736727	0.0351193	0.307786	0.0731965	0.10009
70	0.201715	0.0697688	0.0455567	0.402796	0.0735332	0.167652
70	0.186579	0.0642243	0.0389365	0.402876	0.0718369	0.167469
70	0.222147	0.0774077	0.0553411	0.464273	0.081878	0.222253
70	0.187054	0.0720308	0.0401775	0.383489	0.073186	0.15242
70	0.218406	0.0708173	0.0527164	0.375987	0.0724368	0.146613
70	0.203225	0.0679358	0.0459158	0.504064	0.0768312	0.259984
70	0.163958	0.0718193	0.0320402	0.447074	0.0740048	0.205352
70	0.296466	0.0719831	0.0930736	0.410962	0.0696697	0.173744
70	-0.0354279	0.0656054	0.00555921	0.404723	0.078805	0.170011
70	0.264369	0.0656795	0.0742045	0.450013	0.0733098	0.207886
70	0.201022	0.0711404	0.0454709	0.427845	0.0727833	0.188348
70	0.155753	0.0637303	0.0283206	0.489169	0.070119	0.244203
70	0.274039	0.0737338	0.0805338	0.346828	0.0774063	0.126281
70	0.134794	0.0676846	0.0227506	0.380803	0.0716906	0.150151
70	0.213954	0.0668046	0.0502391	0.375801	0.077337	0.147207
70	0.146783	0.0721088	0.0267448	0.352389	0.0788346	0.130393
70	0.207094	0.0675061	0.0474451	0.396835	0.0725979	0.162748
70	0.288533	0.0694175	0.0880703	0.386908	0.0736037	0.155115
70	0.152511	0.065	0.0274847	0.323957	0.0731244	0.110295
70	0.251006	0.0668571	0.0674741	0.57187	0.0764097	0.332873
70	0.241656	0.0663901	0.0628052	0.387726	0.0667393	0.154785
70	0.22815	0.0642807	0.0561845	0.351217	0.072917	0.12867
70	0.301618	0.0736329	0.0963953	0.395253	0.0702069	0.161154
70	0.176299	0.0735621	0.0364926	0.328971	0.0758141	0.113969
70	0.227342	0.0787911	0.0578927	0.423573	0.0757676	0.185154
70	0.185054	0.0677032	0.0388287	0.343872	0.0751577	0.123897
70	0.124561	0.0690501	0.0202833	0.413448	0.0704076	0.175897
[truncated: 49,516 more rows]

## Sheet: Fig 5B
Fig 5B Bootstrap data
[truncated: 40,002 more rows]

[truncated: 3 more sheets: Fig 5E, Fig S1DE, Fig S2AB]
